# Supplementary material for: LINEs between Species: Evolutionary Dynamics of LINE-1 Retrotransposons across the Eukaryotic Tree of Life
Source: PubMed Central journal article supplement — Genome Biol Evol. 2016 Nov 9;8(11):3301–22. doi: 10.1093/gbe/evw243 (PMC5203782; doi:10.1093/gbe/evw243), 2016-11-09
Supplement: supp_evw243_Supplementary.pdf [file supp_evw243_Supplementary.pdf]

SUPPLEMENTARY MATERIAL

**LINEs between species:  
Evolutionary dynamics of L1 retrotransposons across  
the eukaryotic tree of life**

Atma M. Ivancevic, R. Daniel Kortschak, Terry Bertozzi,  
David L. Adelson

August 2016

# Contents

|          |                                                                                |           |
|----------|--------------------------------------------------------------------------------|-----------|
| <b>1</b> | <b>Introduction</b>                                                            | <b>3</b>  |
| <b>2</b> | <b>Material and Methods</b>                                                    | <b>3</b>  |
| 2.1      | Extraction of L1 repeats from taxa with full genome data . . . . .             | 3         |
| 2.1.1    | Table 1: Set of 503 genomes used in this study . . . . .                       | 4         |
| 2.1.2    | Figure 1: Phylogenetic representation of the genomic dataset . . . . .         | 25        |
| 2.1.3    | Tables 2, 3: Genome assembly quality check . . . . .                           | 26        |
| 2.1.4    | Figure 2: Pipeline for L1 sequence retrieval from full genome data . . . . .   | 56        |
| 2.2      | Identification of putatively active L1 elements . . . . .                      | 57        |
| 2.2.1    | Figure 3: Categorisation of L1 elements based on open reading frames (ORFs)    | 57        |
| 2.2.2    | Figure 4: Requirements for determining whether an open reading frame is intact | 57        |
| <b>3</b> | <b>Results</b>                                                                 | <b>58</b> |
| 3.1      | Ubiquity of L1 across the eukaryotic tree of life . . . . .                    | 58        |
| 3.1.1    | Table 4: L1s in nucleotide nr/htgs databases, found using TBLASTN . . . . .    | 58        |
| 3.1.2    | Table 5: L1s in the genome, found using LASTZ . . . . .                        | 92        |
| 3.2      | Dead or alive - how many L1s have retained their activity? . . . . .           | 113       |
| 3.2.1    | Table 6: ORF content of L1s in the genome . . . . .                            | 113       |
| 3.2.2    | Table 7: L1 status of each species . . . . .                                   | 123       |
| 3.2.3    | Figure 5: L1 activity superimposed on the inferred tree of life . . . . .      | 136       |
| 3.2.4    | Table 8: Active proportion of full-length L1 elements . . . . .                | 137       |
| 3.3      | Mammalian species typically have a dominant active cluster . . . . .           | 142       |
| 3.3.1    | Table 9: Master versus multiple lineage models . . . . .                       | 142       |
| 3.4      | Reverse transcriptase domain reveals distinct L1 groups . . . . .              | 144       |
| 3.4.1    | Table 10: Plant-specific domains . . . . .                                     | 144       |
| 3.4.2    | Figure 6: ORF2p associated domain network diagrams . . . . .                   | 146       |
| 3.5      | Variation of ORF1 proteins across species . . . . .                            | 154       |
| 3.5.1    | Tables 11, 12: ORF1p domain identification analysis . . . . .                  | 154       |
| 3.5.2    | Figure 7: ORF1p associated domain network diagrams . . . . .                   | 168       |

# **1 Introduction**

The following supplementary material is provided as an all-inclusive recount of the data presented in the main text. As with all large-scale analyses, the sheer scope of the data in this project can be overwhelming, and we acknowledge that many readers will only be interested in certain sections of the text. Accordingly, considerable effort has been made to ensure easy accessibility and reproducibility. The information that follows presents a much more detailed overview of the methods and results, with sections titled the same as in the paper.

## **2 Material and Methods**

### **2.1 Extraction of L1 repeats from taxa with full genome data**

### 2.1.1 Table 1: Set of 503 genomes used in this study

Table 1: **Genomic dataset:** Shows the systematic name, common name, genome version, source and submitter of all the genomes tested for L1 elements. Genomes that were acquired through private collaboration (not publicly available) are marked as ‘Private’ in the source column. The genomes are listed as they appear in our inferred tree of life (Fig. 1) with headings indicating the class or species group (e.g. MAMMALIA) and order (e.g. Monotremata). The following abbreviations are used for submitters:

Agencourt Bioscience Corporation = Agen;  
 Ant Genomics Consortium = AGC;  
 Aquatic Genome Models = AGM;  
 Baylor College of Medicine = BCM;  
 Beijing Genomics Institute = BGI;  
 Broad Institute = Broad;  
 California Institute of Technology = Caltech;  
 Chinese Human Genome Center at Shanghai = CHGC;  
 Chinese University of Hong Kong = CUHK;  
 College of Animal Science, Inner Mongolian Agricultural University, China = IMAU;  
 DOE Joint Genome Institute = JGI;  
 European Bioinformatics Institute (EMBL-EBI) = EBI;  
 Genome Reference Consortium = GRC;  
 Genome Sequencing Platform = GSP;  
 Genome Sequencing Platform, The Genome Assembly Team = GAT;  
 Glossina Genomes Consortium = GGC;  
 i5k Initiative = i5k;  
 Institute of Molecular and Cell Biology = IMCB;  
 International Crocodylian Genomes Working Group = ICGWG;  
 J. Craig Venter Institute = JCVI;  
 Kazusa DNA Research Institute = KDRI;  
 Max-Planck Institute = MP;  
 McGill University = McGill;  
 modENCODE Project = modENCODE;  
 Oryza Map Alignment Project = OMAP;  
 School of Biological & Chemical Sciences, Queen Mary University of London = QMUL;  
 Seoul National University = SNU;  
 Texas A&M University = TAMU;  
 Tokyo Institute of Technology = TokyoTech;  
 University of Illinois at Urbana-Champaign = UIUC;  
 University of Lausanne = UNIL;  
 University of Maryland = Mary;  
 University of Southern California = USC;  
 Uppsala University = UU;  
 Washington University = WashU;  
 Wellcome Trust Sanger Institute = WTSI;  
 ZF-screens B.V. = ZF-S.

| No                 | Systematic Name                 | Common Name | Genome Version | Source  | Submitter |
|--------------------|---------------------------------|-------------|----------------|---------|-----------|
| <b>MAMMALIA</b>    |                                 |             |                |         |           |
| <b>Monotremata</b> |                                 |             |                |         |           |
| 1                  | <i>Tachyglossus aculeatus</i>   | Echidna     | Tachyglossus   | Private | -         |
| 2                  | <i>Ornithorhynchus anatinus</i> | Platypus    | ornAna1        | UCSC    | WashU     |
| <b>Marsupialia</b> |                                 |             |                |         |           |
| 3                  | <i>Monodelphis domestica</i>    | Opossum     | monDom5        | UCSC    | GAT       |

| No                    | Systematic Name                       | Common Name               | Genome Version       | Source  | Submitter                                      |
|-----------------------|---------------------------------------|---------------------------|----------------------|---------|------------------------------------------------|
| 4                     | <i>Macropus eugenii</i>               | Tammar wallaby            | Meug.1.1             | NCBI    | Tammar Wallaby Genome Sequencing Consortium    |
| 5                     | <i>Sarcophilus harrisi</i>            | Tasmanian devil           | sarHar1              | UCSC    | WTSI                                           |
| <b>Xenarthra</b>      |                                       |                           |                      |         |                                                |
| 6                     | <i>Dasypus novemcinctus</i>           | Armadillo                 | Dasnov3.0            | NCBI    | BCM                                            |
| 7                     | <i>Choloepus hoffmanni</i>            | Sloth                     | choHof1              | UCSC    | Broad                                          |
| <b>Afrotheria</b>     |                                       |                           |                      |         |                                                |
| 8                     | <i>Chrysochloris asiatica</i>         | Cape golden mole          | ChrAsi1.0            | NCBI    | Broad                                          |
| 9                     | <i>Echinops telfairi</i>              | Tenrec                    | EchTel2.0            | NCBI    | Broad                                          |
| 10                    | <i>Orycteropus afer afer</i>          | Aardvark                  | OryAfe1.0            | NCBI    | Broad                                          |
| 11                    | <i>Elephantulus edwardii</i>          | Cape elephant shrew       | EleEdw1.0            | NCBI    | Broad                                          |
| 12                    | <i>Trichechus manatus latirostris</i> | Manatee                   | TriManLat1.0         | NCBI    | Broad                                          |
| 13                    | <i>Procavia capensis</i>              | Rock hyrax                | proCap1              | UCSC    | BCM                                            |
| 14                    | <i>Loxodonta africana</i>             | Elephant                  | LAv4                 | Private | -                                              |
| <b>Insectivora</b>    |                                       |                           |                      |         |                                                |
| 15                    | <i>Erinaceus europaeus</i>            | Hedgehog                  | EriEur2.0            | NCBI    | Broad                                          |
| 16                    | <i>Sorex araneus</i>                  | Common shrew              | SorAra2.0            | NCBI    | Broad                                          |
| 17                    | <i>Condylura cristata</i>             | Star-nosed mole           | ConCri1.0            | NCBI    | Broad                                          |
| <b>Chiroptera</b>     |                                       |                           |                      |         |                                                |
| 18                    | <i>Pteropus alecto</i>                | Black flying fox          | ASM32557v1           | NCBI    | BGI                                            |
| 19                    | <i>Pteropus vampyrus</i>              | Megabat                   | pteVam1              | UCSC    | BCM                                            |
| 20                    | <i>Eidolon helvum</i>                 | Straw-coloured fruit bat  | ASM46528v1           | NCBI    | QMUL                                           |
| 21                    | <i>Megaderma lyra</i>                 | Greater false vampire bat | ASM46534v1           | NCBI    | QMUL                                           |
| 22                    | <i>Rhinolophus ferrumequinum</i>      | Greater horseshoe bat     | ASM46549v1           | NCBI    | QMUL                                           |
| 23                    | <i>Pteronotus parnellii</i>           | Parnells mustached bat    | ASM46540v1           | NCBI    | QMUL                                           |
| 24                    | <i>Eptesicus fuscus</i>               | Big brown bat             | EptFus1.0            | NCBI    | Broad                                          |
| 25                    | <i>Myotis brandtii</i>                | Brandts bat               | ASM41265v1           | NCBI    | BGI                                            |
| 26                    | <i>Myotis davidii</i>                 | Mouse-eared bat           | ASM32734v1           | NCBI    | BGI                                            |
| 27                    | <i>Myotis lucifugus</i>               | Microbat                  | Myoluc2.0            | NCBI    | Broad                                          |
| <b>Perissodactyla</b> |                                       |                           |                      |         |                                                |
| 28                    | <i>Ceratotherium simum simum</i>      | White rhino               | CerSimSim1.0         | NCBI    | Broad                                          |
| 29                    | <i>Equus przewalskii</i>              | Przewalski horse          | Burgud               | NCBI    | IMAU                                           |
| 30                    | <i>Equus caballus</i> (Thoroughbred)  | Thoroughbred horse        | equCab2              | UCSC    | GAT                                            |
| 31                    | <i>Equus caballus</i> (Mongolian)     | Mongolian horse           | Ajinai1.0            | NCBI    | IMAU                                           |
| <b>Pholidota</b>      |                                       |                           |                      |         |                                                |
| 32                    | <i>Manis pentadactyla</i>             | Chinese pangolin          | M_pentadactyla-1.1.1 | NCBI    | WashU                                          |
| <b>Carnivora</b>      |                                       |                           |                      |         |                                                |
| 33                    | <i>Felis catus</i>                    | Cat                       | felCat5              | UCSC    | International Cat Genome Sequencing Consortium |
| 34                    | <i>Panthera tigris altaica</i>        | Siberian tiger            | PanTig1.0            | NCBI    | Personal Genomics Institute                    |

| No                     | Systematic Name                                 | Common Name             | Genome Version                  | Source | Submitter                                                 |
|------------------------|-------------------------------------------------|-------------------------|---------------------------------|--------|-----------------------------------------------------------|
| 35                     | <i>Canis lupus familiaris</i>                   | Dog                     | CanFam3.1                       | NCBI   | Dog Genome Sequencing Consortium                          |
| 36                     | <i>Ursus maritimus</i>                          | Polar bear              | UrsMar_1.0                      | NCBI   | BGI                                                       |
| 37                     | <i>Ailuropoda melanoleuca</i>                   | Panda                   | ailMel1                         | UCSC   | BGI                                                       |
| 38                     | <i>Leptonychotes weddellii</i>                  | Weddell seal            | LepWed1.0                       | NCBI   | Broad                                                     |
| 39                     | <i>Odobenus rosmarus divergens</i>              | Walrus                  | Oros_1.0                        | NCBI   | Marine Mammals                                            |
| 40                     | <i>Mustela putorius furo</i>                    | Ferret                  | MusPutFur1.0                    | NCBI   | Ferret Genome Sequencing Consortium                       |
| <b>Cetartiodactyla</b> |                                                 |                         |                                 |        |                                                           |
| 41                     | <i>Camelus dromedarius</i>                      | Dromedary               | PRJNA234474_Ca.dromedarius_V1.0 | NCBI   | King Abdulaziz City for Science and Technology            |
| 42                     | <i>Camelus ferus</i>                            | Bactrian camel          | CB1                             | NCBI   | Bactrian Camels Genome Sequencing and Analysis Consortium |
| 43                     | <i>Vicugna pacos</i>                            | Alpaca                  | Vicugna_pacos-2.0.1             | NCBI   | WashU                                                     |
| 44                     | <i>Sus scrofa</i> (Duroc)                       | Duroc pig               | Sscrofa10.2                     | NCBI   | Swine Genome Sequencing Consortium                        |
| 45                     | <i>Sus scrofa</i> (Tibetan)                     | Tibetan pig             | Tibetan_Pig_v1.0                | NCBI   | Novogene                                                  |
| 46                     | <i>Sus scrofa</i> (Ellegaard Gottingen minipig) | Minipig                 | SscrofaMinipig                  | NCBI   | GlaxoSmithKline                                           |
| 47                     | <i>Balaenoptera acutorostrata scammoni</i>      | Minke whale             | BalAcu1.0                       | NCBI   | Korea Ocean Research & Development Institute              |
| 48                     | <i>Physeter catodon</i>                         | Sperm whale             | Physeter_macrocephalus-2.0.2    | NCBI   | AGM                                                       |
| 49                     | <i>Lipotes vexillifer</i>                       | Baiji (Chinese dolphin) | Lipotes_vexillifer_v1           | NCBI   | BGI                                                       |
| 50                     | <i>Tursiops truncatus</i>                       | Bottlenose dolphin      | Ttru_1.4                        | NCBI   | BCM                                                       |
| 51                     | <i>Orcinus orca</i>                             | Killer whale            | Oorc_1.1                        | NCBI   | Marine Mammals                                            |
| 52                     | <i>Pantholops hodgsonii</i>                     | Tibetan antelope        | PHO1.0                          | NCBI   | BGI                                                       |
| 53                     | <i>Capra hircus</i>                             | Goat                    | CHIR_1.0                        | NCBI   | International Goat Genome Consortium                      |
| 54                     | <i>Ovis aries</i> (Texel)                       | Domestic sheep          | oviAri3                         | UCSC   | International Sheep Genome Consortium                     |
| 55                     | <i>Ovis aries musimon</i>                       | Wild sheep              | Oori1                           | NCBI   | EBI                                                       |
| 56                     | <i>Bubalus bubalis</i>                          | Water buffalo           | UMD_CASPUR_WB_2.0               | NCBI   | Mary                                                      |
| 57                     | <i>Bison bison bison</i>                        | Bison                   | Bison_UMD1.0                    | NCBI   | Mary                                                      |
| 58                     | <i>Bos mutus</i>                                | Yak                     | BosGru_v2.0                     | NCBI   | BGI                                                       |
| 59                     | <i>Bos indicus</i>                              | Zebu                    | Bos_indicus_1.0                 | NCBI   | Genoa Biotecnologia SA                                    |
| 60                     | <i>Bos taurus</i>                               | Cow                     | bosTau6                         | UCSC   | Mary                                                      |
| <b>Lagomorpha</b>      |                                                 |                         |                                 |        |                                                           |
| 61                     | <i>Ochotona princeps</i>                        | American pika           | OchPri3.0                       | NCBI   | Broad                                                     |

| No                | Systematic Name                        | Common Name            | Genome Version          | Source | Submitter                                       |
|-------------------|----------------------------------------|------------------------|-------------------------|--------|-------------------------------------------------|
| 62                | <i>Oryctolagus cuniculus</i>           | Rabbit                 | oryCun2                 | UCSC   | GSP                                             |
| <b>Rodentia</b>   |                                        |                        |                         |        |                                                 |
| 63                | <i>Ictidomys tridecemlineatus</i>      | Squirrel               | SpeTri2.0               | NCBI   | Broad                                           |
| 64                | <i>Heterocephalus glaber</i>           | Naked molerat          | HetGla_female_1.0       | NCBI   | Broad                                           |
| 65                | <i>Fukomys damarensis</i>              | Damaraland molerat     | DMR_v1.0                | NCBI   | BGI                                             |
| 66                | <i>Cavia aperea</i>                    | Brazilian guinea pig   | CavAp1.0                | NCBI   | Leibniz Institute for Zoo and Wildlife research |
| 67                | <i>Cavia porcellus</i>                 | Guinea pig             | cavPor3                 | UCSC   | GSP                                             |
| 68                | <i>Chinchilla lanigera</i>             | Chinchilla             | ChiLan1.0               | NCBI   | Broad                                           |
| 69                | <i>Octodon degus</i>                   | Degu                   | OctDeg1.0               | NCBI   | Broad                                           |
| 70                | <i>Dipodomys ordii</i>                 | Kangaroo rat           | dipOrd1                 | UCSC   | BCM                                             |
| 71                | <i>Jaculus jaculus</i>                 | Lesser Egyptian jerboa | JacJac1.0               | NCBI   | Broad                                           |
| 72                | <i>Nannospalax galili</i>              | Blind molerat          | S.galili_v1.0           | NCBI   | BGI                                             |
| 73                | <i>Mesocricetus auratus</i>            | Golden hamster         | MesAur1.0               | NCBI   | Broad                                           |
| 74                | <i>Cricetulus griseus</i>              | Chinese hamster        | CriGri_1.0              | NCBI   | BGI                                             |
| 75                | <i>Microtus ochrogaster</i>            | Prairie vole           | MicOch1.0               | NCBI   | Broad                                           |
| 76                | <i>Peromyscus maniculatus bairdii</i>  | Deer mouse             | Pman_1.0                | NCBI   | BCM                                             |
| 77                | <i>Rattus norvegicus</i>               | Rat                    | Rnor_5.0                | NCBI   | Rat Genome Sequencing Consortium                |
| 78                | <i>Mus musculus</i>                    | Mouse                  | GRCm38.p2               | NCBI   | GRC                                             |
| <b>Scandentia</b> |                                        |                        |                         |        |                                                 |
| 79                | <i>Tupaia belangeri</i>                | Tree shrew             | tupBel1                 | UCSC   | Broad                                           |
| 80                | <i>Tupaia chinensis</i>                | Chinese tree shrew     | TupChi_1.0              | NCBI   | BGI                                             |
| <b>Primates</b>   |                                        |                        |                         |        |                                                 |
| 81                | <i>Galeopterus variegatus</i>          | Flying lemur           | G_variegatus-3.0.2      | NCBI   | WashU                                           |
| 82                | <i>Otolemur garnettii</i>              | Bushbaby               | OtoGar3                 | NCBI   | Broad                                           |
| 83                | <i>Microcebus murinus</i>              | Mouse lemur            | micMur1                 | UCSC   | GSP                                             |
| 84                | <i>Tarsius syrichta</i>                | Tarsier                | Tarsius_syrichta-2.0.1  | NCBI   | WashU                                           |
| 85                | <i>Callithrix jacchus</i>              | Marmoset               | Callithrix_jacchus-3.2  | NCBI   | WashU                                           |
| 86                | <i>Saimiri boliviensis boliviensis</i> | Squirrel monkey        | SaiBol1.0               | NCBI   | Broad                                           |
| 87                | <i>Rhinopithecus roxellana</i>         | Snub-nosed monkey      | Rrox_v1                 | NCBI   | Novogene                                        |
| 88                | <i>Nasalis larvatus</i>                | Proboscis monkey       | Charlie1.0              | NCBI   | Proboscis Monkey Functional Genome Consortium   |
| 89                | <i>Chlorocebus sabaeus</i>             | Green monkey           | Chlorocebus_sabeus 1.1  | NCBI   | Vervet Genomics Consortium                      |
| 90                | <i>Macaca fascicularis</i>             | Crab-eating macaque    | Macaca_fascicularis_5.0 | NCBI   | WashU                                           |
| 91                | <i>Macaca mulatta</i>                  | Rhesus macaque         | rheMac3                 | UCSC   | BGI                                             |
| 92                | <i>Papio anubis</i>                    | Baboon                 | Panu_2.0                | NCBI   | BCM                                             |
| 93                | <i>Nomascus leucogenys</i>             | Gibbon                 | nomLeu3                 | UCSC   | Gibbon Genome Sequencing Consortium             |

| No                      | Systematic Name                   | Common Name              | Genome Version               | Source | Submitter                                                                          |
|-------------------------|-----------------------------------|--------------------------|------------------------------|--------|------------------------------------------------------------------------------------|
| 94                      | <i>Pongo abelii</i>               | Sumatran orangutan       | P_pygmaeus_2.0.2             | NCBI   | Orangutan Genome Sequencing Consortium                                             |
| 95                      | <i>Gorilla gorilla gorilla</i>    | Gorilla                  | gorGor3.1                    | NCBI   | WTSI                                                                               |
| 96                      | <i>Pan paniscus</i>               | Bonobo                   | panpan1                      | NCBI   | MP                                                                                 |
| 97                      | <i>Pan troglodytes</i>            | Chimp                    | panTro4                      | UCSC   | Chimpanzee Sequencing and Analysis Consortium                                      |
| 98                      | <i>Homo sapiens</i>               | Human                    | GRCh37 (hg19)                | NCBI   | GRC                                                                                |
| <b>SAUROPSIDA</b>       |                                   |                          |                              |        |                                                                                    |
| <b>Testudines</b>       |                                   |                          |                              |        |                                                                                    |
| 99                      | <i>Apalone spinifera</i>          | Spiny softshell turtle   | ASM38561v1                   | NCBI   | WUGSC                                                                              |
| 100                     | <i>Pelodiscus sinensis</i>        | Chinese softshell turtle | PelSin_1.0                   | NCBI   | P. sinensis Genome Project Consortium                                              |
| 101                     | <i>Chelonia mydas</i>             | Green sea turtle         | CheMyd_1.0                   | NCBI   | BGI                                                                                |
| 102                     | <i>Chrysemys picta bellii</i>     | Painted turtle           | chrPic1                      | UCSC   | Painted Turtle Genome Sequencing Consortium                                        |
| <b>Struthioniformes</b> |                                   |                          |                              |        |                                                                                    |
| 103                     | <i>Struthio camelus australis</i> | Ostrich                  | ASM69896v1                   | NCBI   | BGI                                                                                |
| <b>Tinamiformes</b>     |                                   |                          |                              |        |                                                                                    |
| 104                     | <i>Tinamus guttatus</i>           | Tinamou                  | ASM70537v2                   | NCBI   | BGI                                                                                |
| <b>Anseriformes</b>     |                                   |                          |                              |        |                                                                                    |
| 105                     | <i>Anas platyrhynchos</i>         | Mallard                  | BGI.duck_1.0                 | NCBI   | State Key Laboratory for Agrobiotechnology, China Agricultural University, Beijing |
| <b>Galliformes</b>      |                                   |                          |                              |        |                                                                                    |
| 106                     | <i>Lyrurus tetrix tetrix</i>      | Black grouse             | tetTet1                      | NCBI   | UU                                                                                 |
| 107                     | <i>Gallus gallus</i>              | Chicken                  | galGal4                      | UCSC   | International Chicken Genome Consortium                                            |
| 108                     | <i>Coturnix japonica</i>          | Japanese quail           | Coja_1.0                     | NCBI   | Tokyo University of Agriculture                                                    |
| 109                     | <i>Meleagris gallopavo</i>        | Turkey                   | melGal1                      | UCSC   | Turkey Genome Consortium                                                           |
| 110                     | <i>Colinus virginianus</i>        | Bobwhite                 | NB1.1                        | NCBI   | TAMU                                                                               |
| <b>Passeriformes</b>    |                                   |                          |                              |        |                                                                                    |
| 111                     | <i>Acanthisitta chloris</i>       | Rifleman                 | ASM69581v1                   | NCBI   | BGI                                                                                |
| 112                     | <i>Manacus vitellinus</i>         | Manakin                  | ASM69201v1                   | NCBI   | BGI                                                                                |
| 113                     | <i>Zonotrichia albicollis</i>     | White-throated sparrow   | Zonotrichia_albicollis-1.0.1 | NCBI   | White-throated Sparrow Consortium                                                  |
| 114                     | <i>Geospiza fortis</i>            | Medium ground finch      | geoFor1                      | UCSC   | BGI                                                                                |
| 115                     | <i>Serinus canaria</i>            | Atlantic canary          | SCA1                         | NCBI   | MP                                                                                 |
| 116                     | <i>Taeniopygia guttata</i>        | Zebra finch              | taeGut1                      | UCSC   | WashU                                                                              |
| 117                     | <i>Ficedula albicollis</i>        | Collared flycatcher      | FicAlb1.5                    | NCBI   | UU                                                                                 |
| 118                     | <i>Pseudopodoces humilis</i>      | Ground tit               | PseHum1.0                    | NCBI   | BGI                                                                                |
| 119                     | <i>Corvus brachyrhynchos</i>      | American crow            | ASM69197v1                   | NCBI   | BGI                                                                                |
| 120                     | <i>Corvus cornix cornix</i>       | Hooded crow              | Hooded_Crow_genome           | NCBI   | UU                                                                                 |



| No                       | Systematic Name                        | Common Name         | Genome Version               | Source | Submitter                          |
|--------------------------|----------------------------------------|---------------------|------------------------------|--------|------------------------------------|
| <b>Psittaciformes</b>    |                                        |                     |                              |        |                                    |
| 121                      | <i>Ara macao</i>                       | Scarlet macaw       | SMACv1.1                     | NCBI   | TAMU                               |
| 122                      | <i>Amazona vittata</i>                 | Puerto Rican parrot | AV1                          | NCBI   | Puerto Rican Parrot Genome Project |
| 123                      | <i>Melopsittacus undulatus</i>         | Budgerigar          | melUnd1                      | UCSC   | WashU                              |
| 124                      | <i>Nestor notabilis</i>                | Kea                 | ASM69687v1                   | NCBI   | BGI                                |
| <b>Falconiformes</b>     |                                        |                     |                              |        |                                    |
| 125                      | <i>Falco cherrug</i>                   | Saker falcon        | F_cherrug_v1.0               | NCBI   | BGI                                |
| 126                      | <i>Falco peregrinus</i>                | Peregrine falcon    | F_peregrinus_v1.0            | NCBI   | BGI                                |
| <b>Cariamiformes</b>     |                                        |                     |                              |        |                                    |
| 127                      | <i>Cariama cristata</i>                | Seriema             | ASM69053v1                   | NCBI   | BGI                                |
| <b>Coraciiformes</b>     |                                        |                     |                              |        |                                    |
| 128                      | <i>Merops nubicus</i>                  | Bee eater           | ASM69184v1                   | NCBI   | BGI                                |
| <b>Piciformes</b>        |                                        |                     |                              |        |                                    |
| 129                      | <i>Picoides pubescens</i>              | Woodpecker          | ASM69900v1                   | NCBI   | BGI                                |
| <b>Bucerotiformes</b>    |                                        |                     |                              |        |                                    |
| 130                      | <i>Buceros rhinoceros silvestris</i>   | Hornbill            | ASM71030v1                   | NCBI   | BGI                                |
| <b>Trogoniformes</b>     |                                        |                     |                              |        |                                    |
| 131                      | <i>Apaloderma vittatum</i>             | Trogon              | ASM70340v1                   | NCBI   | BGI                                |
| <b>Leptosomiformes</b>   |                                        |                     |                              |        |                                    |
| 132                      | <i>Leptosomus discolor</i>             | Cuckoo roller       | ASM69178v1                   | NCBI   | BGI                                |
| <b>Accipitriformes</b>   |                                        |                     |                              |        |                                    |
| 133                      | <i>Haliaeetus albicilla</i>            | White-tailed eagle  | ASM69140v1                   | NCBI   | BGI                                |
| 134                      | <i>Haliaeetus leucocephalus</i>        | Bald eagle          | Haliaeetus_leucocephalus-4.0 | NCBI   | The Bald Eagle Consortium          |
| 135                      | <i>Aquila chrysaetos canadensis</i>    | Golden eagle        | Aquila_chrysaetos-1.0.2      | NCBI   | WashU                              |
| 136                      | <i>Cathartes aura</i>                  | Turkey vulture      | ASM69994v1                   | NCBI   | BGI                                |
| <b>Strigiformes</b>      |                                        |                     |                              |        |                                    |
| 137                      | <i>Tyto alba</i>                       | Barn owl            | ASM68720v1                   | NCBI   | BGI                                |
| <b>Coliiformes</b>       |                                        |                     |                              |        |                                    |
| 138                      | <i>Colius striatus</i>                 | Mousebird           | ASM69071v1                   | NCBI   | BGI                                |
| <b>Charadriiformes</b>   |                                        |                     |                              |        |                                    |
| 139                      | <i>Charadrius vociferus</i>            | Killdeer            | ASM70802v2                   | NCBI   | BGI                                |
| <b>Gruiformes</b>        |                                        |                     |                              |        |                                    |
| 140                      | <i>Balearica regulorum gibbericeps</i> | Grey crane          | ASM70989v1                   | NCBI   | BGI                                |
| 141                      | <i>Chlamydotis macqueenii</i>          | MacQueen's bustard  | ASM69519v1                   | NCBI   | BGI                                |
| <b>Cuculiformes</b>      |                                        |                     |                              |        |                                    |
| 142                      | <i>Cuculus canorus</i>                 | Common cuckoo       | ASM70932v1                   | NCBI   | BGI                                |
| <b>Procellariiformes</b> |                                        |                     |                              |        |                                    |
| 143                      | <i>Fulmarus glacialis</i>              | Fulmar              | ASM69083v1                   | NCBI   | BGI                                |
| <b>Sphenisciformes</b>   |                                        |                     |                              |        |                                    |
| 144                      | <i>Aptenodytes forsteri</i>            | Emperor penguin     | ASM69914v1                   | NCBI   | BGI                                |
| 145                      | <i>Pygoscelis adeliae</i>              | Adelie penguin      | ASM69910v1                   | NCBI   | BGI                                |
| <b>Pelecaniformes</b>    |                                        |                     |                              |        |                                    |
| 146                      | <i>Phalacrocorax carbo</i>             | Black cormorant     | ASM70892v1                   | NCBI   | BGI                                |
| 147                      | <i>Pelecanus crispus</i>               | Pelican             | ASM68737v1                   | NCBI   | BGI                                |

| No                         | Systematic Name                    | Common Name           | Genome Version                  | Source          | Submitter                                                    |
|----------------------------|------------------------------------|-----------------------|---------------------------------|-----------------|--------------------------------------------------------------|
| 148                        | <i>Nipponia nippon</i>             | Ibis                  | ASM70822v1                      | NCBI            | BGI                                                          |
| 149                        | <i>Egretta garzetta</i>            | Egret                 | ASM68718v1                      | NCBI            | College of Medicine and Forensics, Xi'an Jiaotong University |
| 150                        | <i>Phaethon lepturus</i>           | Tropicbird            | ASM68728v1                      | NCBI            | BGI                                                          |
| <b>Gaviiformes</b>         |                                    |                       |                                 |                 |                                                              |
| 151                        | <i>Gavia stellata</i>              | Loon                  | ASM69087v1                      | NCBI            | BGI                                                          |
| <b>Musophagiformes</b>     |                                    |                       |                                 |                 |                                                              |
| 152                        | <i>Tauraco erythrolophus</i>       | Turaco                | ASM70936v1                      | NCBI            | BGI                                                          |
| <b>Opisthocomiformes</b>   |                                    |                       |                                 |                 |                                                              |
| 153                        | <i>Opisthocomus hoazin</i>         | Hoatzin               | ASM69207v1                      | NCBI            | BGI                                                          |
| <b>Columbiformes</b>       |                                    |                       |                                 |                 |                                                              |
| 154                        | <i>Columba livia</i>               | Rock dove             | Cliv_1.0                        | NCBI            | BGI                                                          |
| <b>Pteroclidiformes</b>    |                                    |                       |                                 |                 |                                                              |
| 155                        | <i>Pterocles gutturalis</i>        | Sandgrouse            | ASM69924v1                      | NCBI            | BGI                                                          |
| <b>Apodiformes</b>         |                                    |                       |                                 |                 |                                                              |
| 156                        | <i>Calypte anna</i>                | Anna's hummingbird    | ASM69908v1                      | NCBI            | BGI                                                          |
| 157                        | <i>Chaetura pelagica</i>           | Chimney swift         | ChaPel_1.0                      | NCBI            | BGI                                                          |
| <b>Caprimulgiformes</b>    |                                    |                       |                                 |                 |                                                              |
| 158                        | <i>Caprimulgus carolinensis</i>    | Chuck-will's-widow    | ASM70074v1                      | NCBI            | BGI                                                          |
| <b>Eurypygiformes</b>      |                                    |                       |                                 |                 |                                                              |
| 159                        | <i>Eurypyga helias</i>             | Sunbittern            | ASM69077v1                      | NCBI            | BGI                                                          |
| <b>Mesitornithiformes</b>  |                                    |                       |                                 |                 |                                                              |
| 160                        | <i>Mesitornis unicolor</i>         | Mesite                | ASM69576v1                      | NCBI            | BGI                                                          |
| <b>Podicipediformes</b>    |                                    |                       |                                 |                 |                                                              |
| 161                        | <i>Podiceps cristatus</i>          | Grebe                 | ASM69954v1                      | NCBI            | BGI                                                          |
| <b>Phoenicopteriformes</b> |                                    |                       |                                 |                 |                                                              |
| 162                        | <i>Phoenicopterus ruber ruber</i>  | Flamingo              | ASM68726v1                      | NCBI            | BGI                                                          |
| <b>Crocodylia</b>          |                                    |                       |                                 |                 |                                                              |
| 163                        | <i>Alligator mississippiensis</i>  | American alligator    | allMis1                         | UCSC            | ICGWC                                                        |
| 164                        | <i>Alligator sinensis</i>          | Chinese alligator     | ASM45574v1                      | NCBI            | BGI                                                          |
| 165                        | <i>Crocodylus porosus</i>          | Saltwater crocodile   | Cpor_2.0                        | NCBI            | ICGWC                                                        |
| 166                        | <i>Gavialis gangeticus</i>         | Gharial crocodile     | ggan_v0.2                       | NCBI            | ICGWC                                                        |
| <b>Squamata</b>            |                                    |                       |                                 |                 |                                                              |
| 167                        | <i>Pogona vitticeps</i>            | Bearded dragon        | Pogona_vitticeps.male           | Private (Terry) | -                                                            |
| 168                        | <i>Anolis carolinensis</i>         | Anole lizard          | anoCar2                         | UCSC            | Broad                                                        |
| 169                        | <i>Vipera berus berus</i>          | Common European viper | Vber.be_1.0                     | NCBI            | BCM-HGSC                                                     |
| 170                        | <i>Crotalus mitchellii pyrrhus</i> | Pit viper             | CrotMitch1.0                    | NCBI            | Reed College                                                 |
| 171                        | <i>Ophiophagus hannah</i>          | King cobra            | OphHan1.0                       | NCBI            | Naturalis Biodiversity Center                                |
| 172                        | <i>Python bivittatus</i>           | Burmese python        | Python_molurus_bivittatus-5.0.2 | NCBI            | The Consortium for Comparative Genomics, UC Denver           |
| <b>AMPHIBIA</b>            |                                    |                       |                                 |                 |                                                              |

| No                        | Systematic Name                 | Common Name            | Genome Version                                                                                           | Source | Submitter                                                |
|---------------------------|---------------------------------|------------------------|----------------------------------------------------------------------------------------------------------|--------|----------------------------------------------------------|
| <b>Anura</b>              |                                 |                        |                                                                                                          |        |                                                          |
| 173                       | <i>Nanorana parkeri</i>         | Tibetan frog           | ASM93562v1                                                                                               | NCBI   | BGI                                                      |
| 174                       | <i>Xenopus tropicalis</i>       | Western clawed frog    | Xtropicalis.v7                                                                                           | NCBI   | JGI                                                      |
| <b>NEOPTERYGII</b>        |                                 |                        |                                                                                                          |        |                                                          |
| <b>Lepisosteiformes</b>   |                                 |                        |                                                                                                          |        |                                                          |
| 175                       | <i>Lepisosteus oculatus</i>     | Spotted gar            | LepOcu1                                                                                                  | NCBI   | Broad                                                    |
| <b>Anguilliformes</b>     |                                 |                        |                                                                                                          |        |                                                          |
| 176                       | <i>Anguilla anguilla</i>        | European eel           | Anguilla_anguilla.v1_09_nov_10                                                                           | NCBI   | ZF-S                                                     |
| 177                       | <i>Anguilla japonica</i>        | Japanese eel           | japanese_eel_genome_v1_25_oct_2011_japonica_c401b400k25m200_sspacepremium_k3a02n24_extra.final.scaffolds | NCBI   | ZF-S                                                     |
| <b>Cypriniformes</b>      |                                 |                        |                                                                                                          |        |                                                          |
| 178                       | <i>Danio rerio</i>              | Zebrafish              | danRer7                                                                                                  | UCSC   | WTSI                                                     |
| <b>Characiformes</b>      |                                 |                        |                                                                                                          |        |                                                          |
| 179                       | <i>Astyanax mexicanus</i>       | Mexican tetra          | Astyanax_mexicanus-1.0.2                                                                                 | NCBI   | AGM                                                      |
| <b>Beloniformes</b>       |                                 |                        |                                                                                                          |        |                                                          |
| 180                       | <i>Oryzias latipes</i>          | Medaka                 | ASM31367v1                                                                                               | NCBI   | Medaka genome sequencing project                         |
| <b>Cyprinodontiformes</b> |                                 |                        |                                                                                                          |        |                                                          |
| 181                       | <i>Poecilia formosa</i>         | Amazon molly           | Poecilia_formosa-5.1.2                                                                                   | NCBI   | AGM                                                      |
| 182                       | <i>Xiphophorus maculatus</i>    | Southern platyfish     | Xiphophorus_maculatus-4.4.2                                                                              | NCBI   | The Genome Institute, Washington University at St. Louis |
| 183                       | <i>Fundulus heteroclitus</i>    | Mummichog              | Fundulus_heteroclitus-3.0.2                                                                              | NCBI   | WashU                                                    |
| <b>Tetraodontiformes</b>  |                                 |                        |                                                                                                          |        |                                                          |
| 184                       | <i>Takifugu flavidus</i>        | Yellowbelly pufferfish | version 1 of Takifugu flavidus genome                                                                    | NCBI   | IOCAS                                                    |
| 185                       | <i>Takifugu rubripes</i>        | Fugu                   | fr3                                                                                                      | UCSC   | The Fugu Genome Sequencing Consortium                    |
| 186                       | <i>Tetraodon nigroviridis</i>   | Tetraodon              | tetNig2                                                                                                  | UCSC   | Genoscope                                                |
| <b>Pleuronectiformes</b>  |                                 |                        |                                                                                                          |        |                                                          |
| 187                       | <i>Cynoglossus semilaevis</i>   | Tongue sole            | Cse.v1.0                                                                                                 | NCBI   | BGI                                                      |
| <b>Perciformes</b>        |                                 |                        |                                                                                                          |        |                                                          |
| 188                       | <i>Haplochromis burtoni</i>     | Burton's haplo         | AstBur1.0                                                                                                | NCBI   | Broad                                                    |
| 189                       | <i>Pundamilia nyererei</i>      | Flameback cichlid      | PunNye1.0                                                                                                | NCBI   | Broad                                                    |
| 190                       | <i>Maylandia zebra</i>          | Zebra mbuna            | MetZeb1.1                                                                                                | NCBI   | Broad                                                    |
| 191                       | <i>Neolamprologus brichardi</i> | Fairy cichlid          | NeoBri1.0                                                                                                | NCBI   | Broad                                                    |
| 192                       | <i>Oreochromis niloticus</i>    | Nile tilapia           | oreNil2                                                                                                  | UCSC   | Broad                                                    |
| 193                       | <i>Sebastes nigrocinctus</i>    | Tiger rockfish         | Snig1.0                                                                                                  | NCBI   | USC                                                      |
| 194                       | <i>Sebastes rubrivinctus</i>    | Flag rockfish          | SRub1.0                                                                                                  | NCBI   | USC                                                      |
| 195                       | <i>Gasterosteus aculeatus</i>   | Stickleback            | gasAcu1                                                                                                  | UCSC   | Broad                                                    |

| No                       | Systematic Name                   | Common Name              | Genome Version                            | Source          | Submitter                                              |
|--------------------------|-----------------------------------|--------------------------|-------------------------------------------|-----------------|--------------------------------------------------------|
| <b>Gadiformes</b>        |                                   |                          |                                           |                 |                                                        |
| 196                      | <i>Gadus morhua</i>               | Atlantic cod             | gadMor1                                   | UCSC            | Genofisk                                               |
| <b>CHONDRICHTHYES</b>    |                                   |                          |                                           |                 |                                                        |
| <b>Chimaeriformes</b>    |                                   |                          |                                           |                 |                                                        |
| 197                      | <i>Callorhynchus milii</i>        | Australian ghostshark    | Callorhynchus_milii-6.1.3                 | NCBI            | IMCB                                                   |
| <b>Carcharhiniformes</b> |                                   |                          |                                           |                 |                                                        |
| 198                      | <i>Carcharhinus brachyurus</i>    | Copper shark             | shark_ass                                 | Private (Terry) | -                                                      |
| <b>ECDYSOZOA</b>         |                                   |                          |                                           |                 |                                                        |
| <b>Ephemeroptera</b>     |                                   |                          |                                           |                 |                                                        |
| 199                      | <i>Ephemera danica</i>            | Green drake              | Edan_1.0                                  | NCBI            | i5k                                                    |
| <b>Odonata</b>           |                                   |                          |                                           |                 |                                                        |
| 200                      | <i>Ladona fulva</i>               | Dragonfly                | Lful_1.0                                  | NCBI            | i5k                                                    |
| <b>Phthiraptera</b>      |                                   |                          |                                           |                 |                                                        |
| 201                      | <i>Pediculus humanus corporis</i> | Body louse               | JCVILLOUSE_1.0                            | NCBI            | JCVI                                                   |
| <b>Thysanoptera</b>      |                                   |                          |                                           |                 |                                                        |
| 202                      | <i>Frankliniella occidentalis</i> | Flower thrips            | Focc_1.0                                  | NCBI            | i5k                                                    |
| <b>Hemiptera</b>         |                                   |                          |                                           |                 |                                                        |
| 203                      | <i>Diaphorina citri</i>           | Asian citrus psyllid     | Diaci psyllid genome assembly version 1.1 | NCBI            | International Psyllid Genome Consortium                |
| 204                      | <i>Pachypsylla venusta</i>        | Petiolegall psyllid      | Pven_1.0                                  | NCBI            | i5k                                                    |
| 205                      | <i>Acyrtosiphon pisum</i>         | Pea aphid                | Acyr_2.0                                  | NCBI            | BCM                                                    |
| 206                      | <i>Nilaparvata lugens</i>         | Brown planthopper        | NilLug1.0                                 | NCBI            | Nilaparvata lugens Genome Consortium                   |
| 207                      | <i>Oncopeltus fasciatus</i>       | Milkweed bug             | Ofas_1.0                                  | NCBI            | BCM-HGSC i5k                                           |
| 208                      | <i>Rhodnius prolixus</i>          | Assassin bug             | Rhodnius_prolixus-3.0.1                   | NCBI            | WashU                                                  |
| 209                      | <i>Cimex lectularius</i>          | Bed bug                  | Clec_1.0                                  | NCBI            | i5k                                                    |
| <b>Coleoptera</b>        |                                   |                          |                                           |                 |                                                        |
| 210                      | <i>Onthophagus taurus</i>         | Taurus scarab            | Otau_1.0                                  | NCBI            | i5k                                                    |
| 211                      | <i>Agrilus planipennis</i>        | Emerald ash borer        | Apla_1.0                                  | NCBI            | BCM-HGSC i5k                                           |
| 212                      | <i>Tribolium castaneum</i>        | Red flour beetle         | Tcas_3.0                                  | NCBI            | BCM                                                    |
| 213                      | <i>Anoplophora glabripennis</i>   | Asian long-horned beetle | Agla_1.0                                  | NCBI            | i5k                                                    |
| 214                      | <i>Leptinotarsa decemlineata</i>  | Colorado potato beetle   | Ldec_1.5                                  | NCBI            | i5k                                                    |
| 215                      | <i>Dendroctonus ponderosae</i>    | Mountain pine beetle     | DendPond_male_1.0                         | NCBI            | The Tria Project: Mountain Pine Beetle System Genomics |
| <b>Strepsiptera</b>      |                                   |                          |                                           |                 |                                                        |
| 216                      | <i>Mengenilla moldrzyki</i>       | Twisted-wing parasite    | Memo_1.0                                  | NCBI            | Zoologisches Forschungsmuseum Alexander Koenig         |
| <b>Diptera</b>           |                                   |                          |                                           |                 |                                                        |
| 217                      | <i>Aedes aegypti</i>              | Yellow fever mosquito    | AaegL2                                    | NCBI            | TIGR                                                   |
| 218                      | <i>Culex quinquefasciatus</i>     | Southern house mosquito  | CulPip1.0                                 | NCBI            | Broad                                                  |

| No  | Systematic Name                  | Common Name              | Genome Version              | Source | Submitter                                                 |
|-----|----------------------------------|--------------------------|-----------------------------|--------|-----------------------------------------------------------|
| 219 | <i>Anopheles albimanus</i>       | -                        | Anop_albi_ALBI9_A_V1        | NCBI   | Broad                                                     |
| 220 | <i>Anopheles arabiensis</i>      | -                        | Anop_arab_DONG5_A_V1        | NCBI   | Broad                                                     |
| 221 | <i>Anopheles atroparvus</i>      | -                        | Anop_atro_EBRO_V1           | NCBI   | Broad                                                     |
| 222 | <i>Anopheles christyi</i>        | -                        | Anop_chri_ACHKN1017_V1      | NCBI   | Broad                                                     |
| 223 | <i>Anopheles culicifacies</i>    | -                        | Anop_culi_species_A-37_1_V1 | NCBI   | Broad                                                     |
| 224 | <i>Anopheles darlingi</i>        | -                        | A_darlingi_v1               | NCBI   | Laboratorio Nacional de Computacao Cientifica             |
| 225 | <i>Anopheles dirus</i>           | -                        | Anop_diru_WRAIR2_V1         | NCBI   | Broad                                                     |
| 226 | <i>Anopheles epiroticus</i>      | -                        | Anop_epir_epiroticus2_V1    | NCBI   | Broad                                                     |
| 227 | <i>Anopheles farauti</i>         | -                        | Anop_fara_FAR1_V2           | NCBI   | Broad                                                     |
| 228 | <i>Anopheles funestus</i>        | -                        | Anop_fune_FUMOZ_V1          | NCBI   | Broad                                                     |
| 229 | <i>Anopheles gambiae</i>         | African malaria mosquito | anoGam1                     | UCSC   | International Anopheles Genome Project                    |
| 230 | <i>Anopheles maculatus</i>       | -                        | Anop_macu_maculatus3_V1     | NCBI   | Broad                                                     |
| 231 | <i>Anopheles melas</i>           | -                        | Anop_mela_CM1001059_A_V2    | NCBI   | Broad                                                     |
| 232 | <i>Anopheles merus</i>           | -                        | Anop_meru_MAF_V1            | NCBI   | Broad                                                     |
| 233 | <i>Anopheles minimus</i>         | -                        | Anop_mini_MINIMUS1_V1       | NCBI   | Broad                                                     |
| 234 | <i>Anopheles quadriannulatus</i> | -                        | Anop_quad_QUAD4_A_V1        | NCBI   | Broad                                                     |
| 235 | <i>Anopheles sinensis</i>        | -                        | AS2                         | NCBI   | Nanjing Medical University                                |
| 236 | <i>Anopheles stephensi</i>       | -                        | ASM30077v2                  | NCBI   | Virginia Tech                                             |
| 237 | <i>Mayetiola destructor</i>      | Hessian fly              | Mdes_1.0                    | NCBI   | BCM                                                       |
| 238 | <i>Lutzomyia longipalpis</i>     | Sand fly                 | Llon_1.0                    | NCBI   | BCM                                                       |
| 239 | <i>Phlebotomus papatasi</i>      | -                        | Ppap_1.0                    | NCBI   | WashU                                                     |
| 240 | <i>Ceratitis capitata</i>        | Med fly                  | Ccap_1.0                    | NCBI   | i5k                                                       |
| 241 | <i>Drosophila albomicans</i>     | -                        | DroAlb_1.0                  | NCBI   | Kunming Institute of Zoology, Chinese Academy of Sciences |
| 242 | <i>Drosophila ananassae</i>      | -                        | droAna3                     | UCSC   | Agen                                                      |
| 243 | <i>Drosophila biarmipes</i>      | -                        | Dbia_2.0                    | NCBI   | BCM                                                       |
| 244 | <i>Drosophila bipunctinata</i>   | -                        | Dbip_2.0                    | NCBI   | BCM                                                       |
| 245 | <i>Drosophila elegans</i>        | -                        | Dele_2.0                    | NCBI   | BCM                                                       |
| 246 | <i>Drosophila erecta</i>         | -                        | droEre2                     | UCSC   | Agen                                                      |
| 247 | <i>Drosophila eugracilis</i>     | -                        | Deug_2.0                    | NCBI   | modENCODE                                                 |
| 248 | <i>Drosophila ficusphila</i>     | -                        | Dfic_2.0                    | NCBI   | BCM                                                       |
| 249 | <i>Drosophila grimshawi</i>      | -                        | droGri2                     | UCSC   | Agen                                                      |
| 250 | <i>Drosophila kikkawai</i>       | -                        | Dkik_2.0                    | NCBI   | BCM                                                       |

| No                 | Systematic Name                               | Common Name           | Genome Version             | Source | Submitter                                                                 |
|--------------------|-----------------------------------------------|-----------------------|----------------------------|--------|---------------------------------------------------------------------------|
| 251                | <i>Drosophila melanogaster</i>                | -                     | Release 6 plus ISO1 MT     | NCBI   | The FlyBase Consortium/Berkeley Drosophila Genome Project/Celera Genomics |
| 252                | <i>Drosophila miranda</i>                     | -                     | DroMir_2.2                 | NCBI   | University of California, Berkeley                                        |
| 253                | <i>Drosophila mojavensis</i>                  | -                     | droMoj3                    | UCSC   | Agen                                                                      |
| 254                | <i>Drosophila persimilis</i>                  | -                     | droPer1                    | UCSC   | Broad                                                                     |
| 255                | <i>Drosophila pseudoobscura pseudoobscura</i> | -                     | Dpse_3.0                   | NCBI   | BCM                                                                       |
| 256                | <i>Drosophila rhopaloa</i>                    | -                     | Drho_2.0                   | NCBI   | modENCODE                                                                 |
| 257                | <i>Drosophila sechellia</i>                   | -                     | droSec1                    | UCSC   | Broad                                                                     |
| 258                | <i>Drosophila simulans</i>                    | -                     | dsim_caf1                  | NCBI   | WashU                                                                     |
| 259                | <i>Drosophila suzukii</i>                     | -                     | Dsuzukii.v01               | NCBI   | BGI                                                                       |
| 260                | <i>Drosophila takahashii</i>                  | -                     | Dtak_2.0                   | NCBI   | BCM                                                                       |
| 261                | <i>Drosophila virilis</i>                     | -                     | droVir3                    | UCSC   | Agen                                                                      |
| 262                | <i>Drosophila willistoni</i>                  | -                     | dwil_caf1                  | NCBI   | JCVI                                                                      |
| 263                | <i>Drosophila yakuba</i>                      | -                     | dyak_caf1                  | NCBI   | FlyBase                                                                   |
| 264                | <i>Musca domestica</i>                        | House fly             | Musca_domestica-2.0.2      | NCBI   | GGC                                                                       |
| 265                | <i>Glossina austeni</i>                       | Tsetse fly            | Glossina_austeni-1.0.3     | NCBI   | GGC                                                                       |
| 266                | <i>Glossina brevipalpis</i>                   | -                     | Glossina_brevipalpis_1.0.3 | NCBI   | GGC                                                                       |
| 267                | <i>Glossina fuscipes fuscipes</i>             | -                     | Glossina_fuscipes-3.0.2    | NCBI   | GGC                                                                       |
| 268                | <i>Glossina morsitans morsitans</i>           | -                     | ASM107743v1                | NCBI   | WTSI                                                                      |
| 269                | <i>Glossina pallidipes</i>                    | -                     | Glossina_pallidipes-1.0.3  | NCBI   | GGC                                                                       |
| <b>Trichoptera</b> |                                               |                       |                            |        |                                                                           |
| 270                | <i>Limnephilus lunatus</i>                    | Caddis fly            | Llun_1.0                   | NCBI   | i5k                                                                       |
| <b>Lepidoptera</b> |                                               |                       |                            |        |                                                                           |
| 271                | <i>Papilio glaucus</i>                        | Tiger butterfly       | pgl_assembly_v1            | NCBI   | UT Southwestern Medical Center                                            |
| 272                | <i>Papilio polytes</i>                        | Mormon butterfly      | Ppol_1.0                   | NCBI   | TokyoTech                                                                 |
| 273                | <i>Papilio xuthus</i>                         | Swallowtail butterfly | Pxut_1.0                   | NCBI   | TokyoTech                                                                 |
| 274                | <i>Heliconius melpomene melpomene</i>         | Postman butterfly     | ASM31383v2                 | NCBI   | Heliconius Genome Sequencing Consortium                                   |
| 275                | <i>Melitaea cinxia</i>                        | Glanville fritillary  | MelCinx1.0                 | NCBI   | University of Helsinki                                                    |
| 276                | <i>Danaus plexippus</i>                       | Monarch butterfly     | DanPle_1.0                 | NCBI   | The Reppert Lab                                                           |
| 277                | <i>Bombyx mori</i>                            | Silkworm              | ASM15162v1                 | NCBI   | The International Silkworm Genome Sequencing Consortium                   |
| 278                | <i>Manduca sexta</i>                          | Tobacco hornworm      | Msex_1.0                   | NCBI   | BCM                                                                       |
| 279                | <i>Plutella xylostella</i>                    | Diamondback moth      | DBM_FJ_V1.1                | NCBI   | Plutella xylostella Genome Consortium                                     |
| <b>Hymenoptera</b> |                                               |                       |                            |        |                                                                           |
| 280                | <i>Athalia rosae</i>                          | Turnip sawfly         | Aros_1.0                   | NCBI   | i5k                                                                       |

| No                    | Systematic Name                    | Common Name               | Genome Version           | Source | Submitter                                    |
|-----------------------|------------------------------------|---------------------------|--------------------------|--------|----------------------------------------------|
| 281                   | <i>Cephus cinctus</i>              | Wheat stem sawfly         | Ccin1                    | NCBI   | UIUC                                         |
| 282                   | <i>Orussus abietinus</i>           | Parasitic wood wasp       | Oabi_1.0                 | NCBI   | i5k                                          |
| 283                   | <i>Ceratosolen solmsi marchali</i> | Pollinating wasp          | CerSol_1.0               | NCBI   | Ceratosolen solmsi Genome Consortium         |
| 284                   | <i>Nasonia giraulti</i>            | Jewel wasp                | Ngir_1.0                 | NCBI   | BCM                                          |
| 285                   | <i>Nasonia longicornis</i>         | -                         | Nlon_1.0                 | NCBI   | BCM                                          |
| 286                   | <i>Nasonia vitripennis</i>         | -                         | Nvit_2.1                 | NCBI   | BCM                                          |
| 287                   | <i>Copidosoma floridanum</i>       | Looper parasitoid wasp    | Cflo_1.0                 | NCBI   | i5k                                          |
| 288                   | <i>Trichogramma pretiosum</i>      | -                         | Tpre_1.0                 | NCBI   | i5k                                          |
| 289                   | <i>Microplitis demolitor</i>       | -                         | Mdem1                    | NCBI   | UIUC                                         |
| 290                   | <i>Megachile rotundata</i>         | Alfalfa leafcutter bee    | MROT_1.0                 | NCBI   | University of Maryland                       |
| 291                   | <i>Apis dorsata</i>                | Giant honey bee           | Apis dorsata 1.3         | NCBI   | Cold Spring Harbor Laboratory                |
| 292                   | <i>Apis florea</i>                 | Dwarf honey bee           | Aflo_1.0                 | NCBI   | BCM                                          |
| 293                   | <i>Apis mellifera</i>              | Western honey bee         | Amel_4.5                 | NCBI   | Human Genome Sequencing Center               |
| 294                   | <i>Bombus impatiens</i>            | Common Eastern bumblebee  | BIMP_2.0                 | NCBI   | Biotechnology Center, University of Illinois |
| 295                   | <i>Bombus terrestris</i>           | Buff-tailed bumblebee     | Bter_1.0                 | NCBI   | BCM                                          |
| 296                   | <i>Linepithema humile</i>          | Argentine ant             | Lhum_UMD_V04             | NCBI   | AGC                                          |
| 297                   | <i>Camponotus floridanus</i>       | Florida carpenter ant     | CamFlo_1.0               | NCBI   | BGI                                          |
| 298                   | <i>Acromyrmex echinator</i>        | Panamanian leafcutter ant | Aech_3.9                 | NCBI   | BGI                                          |
| 299                   | <i>Atta cephalotes</i>             | Leafcutter ant            | Attacep1.0               | NCBI   | WashU                                        |
| 300                   | <i>Solenopsis invicta</i>          | Red imported fire ant     | Si_gnG                   | NCBI   | UNIL                                         |
| 301                   | <i>Pogonomyrmex barbatus</i>       | Red harvester ant         | Pbar_UMD_V03             | NCBI   | AGC                                          |
| 302                   | <i>Harpegnathos saltator</i>       | Jumping ant               | HarSal_1.0               | NCBI   | BGI                                          |
| 303                   | <i>Cerapachys biroi</i>            | Clonal raider ant         | CerBir1.0                | NCBI   | BGI                                          |
| <b>Blattodea</b>      |                                    |                           |                          |        |                                              |
| 304                   | <i>Blattella germanica</i>         | German cockroach          | Bger_1.0                 | NCBI   | i5k                                          |
| <b>Isoptera</b>       |                                    |                           |                          |        |                                              |
| 305                   | <i>Zootermopsis nevadensis</i>     | Eusocial termite          | ZooNev1.0                | NCBI   | BGI                                          |
| <b>Diplostraca</b>    |                                    |                           |                          |        |                                              |
| 306                   | <i>Daphnia pulex</i>               | Water flea                | V1.0                     | NCBI   | JGI                                          |
| <b>Calanoida</b>      |                                    |                           |                          |        |                                              |
| 307                   | <i>Eurytemora affinis</i>          | Copepod                   | Eaff_1.0                 | NCBI   | i5k                                          |
| <b>Amphipoda</b>      |                                    |                           |                          |        |                                              |
| 308                   | <i>Hyalella azteca</i>             | Scud                      | Hazt_1.0                 | NCBI   | BCM                                          |
| <b>Geophilomorpha</b> |                                    |                           |                          |        |                                              |
| 309                   | <i>Strigamia maritima</i>          | European centipede        | Smar_1.0                 | NCBI   | BCM                                          |
| <b>Araneae</b>        |                                    |                           |                          |        |                                              |
| 310                   | <i>Stegodyphus mimosarum</i>       | Social spider             | Stegodyphus_mimosarum_v1 | NCBI   | BGI                                          |

| No                     | Systematic Name                     | Common Name                   | Genome Version             | Source | Submitter                                                                             |
|------------------------|-------------------------------------|-------------------------------|----------------------------|--------|---------------------------------------------------------------------------------------|
| 311                    | <i>Latrodectus hesperus</i>         | Black widow                   | Lhes_1.0                   | NCBI   | i5k                                                                                   |
| 312                    | <i>Parasteatoda tepidariorum</i>    | Common house spider           | Ptep_1.0                   | NCBI   | i5k                                                                                   |
| <b>Prostigmata</b>     |                                     |                               |                            |        |                                                                                       |
| 313                    | <i>Tetranychus urticae</i>          | Red spider mite               | ASM23943v1                 | NCBI   | Spider Mite Consortium                                                                |
| <b>Astigmata</b>       |                                     |                               |                            |        |                                                                                       |
| 314                    | <i>Dermatophagoides farinae</i>     | House dust mite               | Dfarinae1.0                | NCBI   | CUHK                                                                                  |
| 315                    | <i>Sarcoptes scabiei type canis</i> | Dog mite                      | SarSca1.0                  | NCBI   | Wright State University                                                               |
| <b>Oribatida</b>       |                                     |                               |                            |        |                                                                                       |
| 316                    | <i>Achipteria coleoptrata</i>       | -                             | SM98876v1                  | NCBI   | UNIL                                                                                  |
| 317                    | <i>Hypochthonius rufulus</i>        | -                             | ASM98884v1                 | NCBI   | UNIL                                                                                  |
| 318                    | <i>Platynothrus peltifer</i>        | Oribatid mite                 | ASM98890v1                 | NCBI   | UNIL                                                                                  |
| 319                    | <i>Steganacarus magnus</i>          | -                             | ASM98888v1                 | NCBI   | UNIL                                                                                  |
| <b>Ixodida</b>         |                                     |                               |                            |        |                                                                                       |
| 320                    | <i>Ixodes ricinus</i>               | Castor bean tick              | ASM97304v1                 | NCBI   | Luxembourg Institute of Health                                                        |
| 321                    | <i>Ixodes scapularis</i>            | Deer tick                     | JCVLISG_i3_1.0             | NCBI   | JCVI                                                                                  |
| 322                    | <i>Rhipicephalus microplus</i>      | Cattle tick                   | CCG_Rmi_1.0                | NCBI   | USDA-ARS                                                                              |
| <b>Mesostigmata</b>    |                                     |                               |                            |        |                                                                                       |
| 323                    | <i>Metaseiulus occidentalis</i>     | Western predatory mite        | Mocc_1.0                   | NCBI   | BCM                                                                                   |
| 324                    | <i>Varroa destructor</i>            | Honeybee mite                 | BRL_Vdes_1.0               | NCBI   | Varroa Genome Sequencing Consortium                                                   |
| <b>Scorpiones</b>      |                                     |                               |                            |        |                                                                                       |
| 325                    | <i>Centruroides exilicauda</i>      | Baja california bark scorpion | Cexi_1.0                   | NCBI   | i5k                                                                                   |
| 326                    | <i>Mesobuthus martensii</i>         | Chinese scorpion              | M_martensii_Version_1      | NCBI   | Institute of Plant Physiology & Ecology, Shanghai Insitutes for Biology Sciences, CAS |
| <b>Xiphosura</b>       |                                     |                               |                            |        |                                                                                       |
| 327                    | <i>Limulus polyphemus</i>           | Atlantic horseshoe crab       | Limulus_polyphemus-2.1.2   | NCBI   | WashU                                                                                 |
| <b>Trichocephalida</b> |                                     |                               |                            |        |                                                                                       |
| 328                    | <i>Trichinella spiralis</i>         | Pork worm                     | Trichinella spiralis-3.7.1 | NCBI   | WashU                                                                                 |
| <b>Ascaridida</b>      |                                     |                               |                            |        |                                                                                       |
| 329                    | <i>Ascaris suum</i>                 | Pig roundworm                 | AscSuum_1.0                | NCBI   | BGI                                                                                   |
| <b>Spirurida</b>       |                                     |                               |                            |        |                                                                                       |
| 330                    | <i>Elaeophora elaphi</i>            | Red deer nematode             | EEL001                     | NCBI   | WTSI                                                                                  |
| 331                    | <i>Onchocerca volvulus</i>          | -                             | OVOC001                    | NCBI   | WTSI                                                                                  |
| <b>Rhabditida</b>      |                                     |                               |                            |        |                                                                                       |
| 332                    | <i>Steinernema monticolum</i>       | -                             | S_monti_v1                 | NCBI   | Caltech                                                                               |
| 333                    | <i>Panagrellus redivivus</i>        | Microworm                     | Pred3                      | NCBI   | Caltech                                                                               |
| 334                    | <i>Haemonchus contortus</i>         | Wireworm                      | HCON                       | NCBI   | WTSI                                                                                  |
| 335                    | <i>Necator americanus</i>           | Human hookworm                | N_americanus_v1            | NCBI   | WashU                                                                                 |



| No                      | Systematic Name                       | Common Name         | Genome Version                    | Source | Submitter                                                                        |
|-------------------------|---------------------------------------|---------------------|-----------------------------------|--------|----------------------------------------------------------------------------------|
| 336                     | <i>Heterorhabditis bacteriophora</i>  | Beneficial nematode | Heterorhabditis_bacteriophora-7.0 | NCBI   | WashU                                                                            |
| 337                     | <i>Caenorhabditis angaria</i>         | -                   | ps1010rel4                        | NCBI   | California Institute of Technology, Division of Biology                          |
| 338                     | <i>Caenorhabditis brenneri</i>        | -                   | C_brenneri-6.0.1b                 | NCBI   | Caenorhabditis brenneri Sequencing and Analysis Consortium                       |
| 339                     | <i>Caenorhabditis briggsae</i>        | -                   | ASM455v1                          | NCBI   | The C.briggsae Sequencing Consortium                                             |
| 340                     | <i>Caenorhabditis elegans</i>         | -                   | WBcel235                          | NCBI   | C. elegans Sequencing Consortium                                                 |
| 341                     | <i>Caenorhabditis japonica</i>        | -                   | C_japonica-7.0.1                  | NCBI   | WashU                                                                            |
| 342                     | <i>Caenorhabditis sp. 11 MAF-2010</i> | -                   | Caenorhabditis_sp11_JU1373-3.0.1  | NCBI   | WashU                                                                            |
| <b>Priapulimorphida</b> |                                       |                     |                                   |        |                                                                                  |
| 343                     | <i>Priapulus caudatus</i>             | Cactus worm         | Priapulus_caudatus-4.0.1          | NCBI   | WashU                                                                            |
| <b>ROTIFERA</b>         |                                       |                     |                                   |        |                                                                                  |
| <b>Bdelloidea</b>       |                                       |                     |                                   |        |                                                                                  |
| 344                     | <i>Adineta vaga</i>                   | Rotifer             | AMS_PRJEB1171_v1                  | NCBI   | Genoscope CEA                                                                    |
| <b>PLATYHELMINTHES</b>  |                                       |                     |                                   |        |                                                                                  |
| <b>Strigeidida</b>      |                                       |                     |                                   |        |                                                                                  |
| 345                     | <i>Schistosoma curassoni</i>          | -                   | S_curassoni_Dakar                 | NCBI   | WTSI                                                                             |
| 346                     | <i>Schistosoma haematobium</i>        | -                   | SchHae_1.0                        | NCBI   | CHGC                                                                             |
| 347                     | <i>Schistosoma japonicum</i>          | -                   | ASM15177v1                        | NCBI   | CHGC                                                                             |
| 348                     | <i>Schistosoma mansoni</i>            | -                   | ASM23792v2                        | NCBI   | Schistosoma Genome Network                                                       |
| 349                     | <i>Schistosoma margrebowiei</i>       | -                   | S_margrebowiei_Zambia             | NCBI   | WTSI                                                                             |
| 350                     | <i>Schistosoma mattheei</i>           | -                   | S_mattheei_Denwood                | NCBI   | WTSI                                                                             |
| 351                     | <i>Schistosoma rodhaini</i>           | -                   | S_rodhaini_Burundi                | NCBI   | WTSI                                                                             |
| <b>Opisthorchiida</b>   |                                       |                     |                                   |        |                                                                                  |
| 352                     | <i>Clonorchis sinensis</i>            | Chinese liver fluke | C_sinensis-2.0                    | NCBI   | Department of Parasitology, Zhongshan School of Medicine, Sun Yat-sen University |
| <b>Cyclophyllidea</b>   |                                       |                     |                                   |        |                                                                                  |
| 353                     | <i>Echinococcus granulosus</i>        | Hyper tapeworm      | EGRAN001                          | NCBI   | WTSI                                                                             |
| 354                     | <i>Echinococcus multilocularis</i>    | Fox tapeworm        | EMULTI001                         | NCBI   | WTSI                                                                             |
| 355                     | <i>Hymenolepis microstoma</i>         | Rodent tapeworm     | HMIC001                           | NCBI   | WTSI                                                                             |
| <b>ANNELIDA</b>         |                                       |                     |                                   |        |                                                                                  |

| No                       | Systematic Name                         | Common Name         | Genome Version                   | Source | Submitter                                                               |
|--------------------------|-----------------------------------------|---------------------|----------------------------------|--------|-------------------------------------------------------------------------|
| <b>Scolecida</b>         |                                         |                     |                                  |        |                                                                         |
| 356                      | <i>Capitella teleta</i>                 | Polychaete worm     | Capcal                           | NCBI   | JGI                                                                     |
| <b>Rhynchobdellida</b>   |                                         |                     |                                  |        |                                                                         |
| 357                      | <i>Helobdella robusta</i>               | Leech               | Helobdella robusta v1.0          | NCBI   | JGI                                                                     |
| <b>MOLLUSCA</b>          |                                         |                     |                                  |        |                                                                         |
| <b>Ostreoida</b>         |                                         |                     |                                  |        |                                                                         |
| 358                      | <i>Crassostrea gigas</i>                | Pacific oyster      | oyster_v9                        | NCBI   | BGI                                                                     |
| <b>Gastropoda</b>        |                                         |                     |                                  |        |                                                                         |
| 359                      | <i>Lottia gigantea</i>                  | Owl limpet          | Helro1                           | NCBI   | JGI                                                                     |
| 360                      | <i>Aplysia californica</i>              | California sea hare | AplCal3.0                        | NCBI   | Broad                                                                   |
| 361                      | <i>Biomphalaria glabrata</i>            | Freshwater snail    | ASM45736v1                       | NCBI   | WashU                                                                   |
| <b>CNIDARIA</b>          |                                         |                     |                                  |        |                                                                         |
| <b>Actiniaria</b>        |                                         |                     |                                  |        |                                                                         |
| 362                      | <i>Nematostella vectensis</i>           | Starlet sea anemone | ASM20922v1                       | NCBI   | JGI                                                                     |
| <b>Anthoathecata</b>     |                                         |                     |                                  |        |                                                                         |
| 363                      | <i>Hydra vulgaris</i>                   | Freshwater polyp    | Hydra_RP_1.0                     | NCBI   | JCVI                                                                    |
| <b>TENTACULATA</b>       |                                         |                     |                                  |        |                                                                         |
| <b>Lobata</b>            |                                         |                     |                                  |        |                                                                         |
| 364                      | <i>Mnemiopsis leidyi</i>                | Warty comb jelly    | MneLei_Aug2011                   | NCBI   | National Human Genome Research Institute, National Institutes of Health |
| <b>PLACOZOA</b>          |                                         |                     |                                  |        |                                                                         |
| 365                      | <i>Trichoplax adhaerens</i>             | Placozoan           | v1.0                             | NCBI   | JGI                                                                     |
| <b>PORIFERA</b>          |                                         |                     |                                  |        |                                                                         |
| <b>Haplosclerida</b>     |                                         |                     |                                  |        |                                                                         |
| 366                      | <i>Amphimedon queenslandica</i>         | Sea sponge          | v1.0                             | NCBI   | JGI                                                                     |
| <b>VIRIDIPLANTAE</b>     |                                         |                     |                                  |        |                                                                         |
| <b>Mamiellales</b>       |                                         |                     |                                  |        |                                                                         |
| 367                      | <i>Micromonas pusilla</i> CCMP1545      | -                   | Micromonas pusilla CCMP1545 v2.0 | NCBI   | Micromonas Genome Consortium                                            |
| 368                      | <i>Micromonas sp.</i> RCC299            | -                   | ASM9098v2                        | NCBI   | Micromonas Genome Consortium                                            |
| 369                      | <i>Ostreococcus lucimarinus</i> CCE9901 | -                   | ASM9206v1                        | NCBI   | JGI                                                                     |
| 370                      | <i>Ostreococcus tauri</i>               | -                   | version 050606                   | NCBI   | Laboratoire Arago, France                                               |
| <b>Chlamydomonadales</b> |                                         |                     |                                  |        |                                                                         |
| 371                      | <i>Chlamydomonas reinhardtii</i>        | -                   | v3.0                             | NCBI   | JGI                                                                     |
| <b>Volvocales</b>        |                                         |                     |                                  |        |                                                                         |
| 372                      | <i>Volvox carteri f. nagariensis</i>    | -                   | v1.0                             | NCBI   | JGI                                                                     |
| <b>Chlorellales</b>      |                                         |                     |                                  |        |                                                                         |
| 373                      | <i>Chlorella variabilis</i>             | -                   | v 1.0                            | NCBI   | JGI                                                                     |
| 374                      | <i>Auxenochlorella protothecoides</i>   | Green microalga     | ASM73321v1                       | NCBI   | BGI                                                                     |

| No                     | Systematic Name                                    | Common Name        | Genome Version                   | Source | Submitter                                           |
|------------------------|----------------------------------------------------|--------------------|----------------------------------|--------|-----------------------------------------------------|
| 375                    | <i>Helicosporidium</i> sp.<br><i>ATCC 50920</i>    | -                  | Helico_v1.0                      | NCBI   | University of British Columbia                      |
| <b>Chlorococcales</b>  |                                                    |                    |                                  |        |                                                     |
| 376                    | <i>Coccomyxa</i><br><i>subellipsoidea C-169</i>    | -                  | Coccomyxa<br>subellipsoidae v2.0 | NCBI   | JGI                                                 |
| <b>Klebsormidiales</b> |                                                    |                    |                                  |        |                                                     |
| 377                    | <i>Klebsormidium</i><br><i>flaccidum</i>           | -                  | ASM70883v1                       | NCBI   | TokyoTech                                           |
| <b>Funariales</b>      |                                                    |                    |                                  |        |                                                     |
| 378                    | <i>Physcomitrella patens</i>                       | -                  | V1.1                             | NCBI   | Moss Genome Consortium                              |
| <b>Selaginellales</b>  |                                                    |                    |                                  |        |                                                     |
| 379                    | <i>Selaginella</i><br><i>moellendorffii</i>        | Spikemoss          | v1.0                             | NCBI   | Selaginella Consortium                              |
| <b>Pinales</b>         |                                                    |                    |                                  |        |                                                     |
| 380                    | <i>Pinus taeda</i>                                 | Loblolly pine      | PtaedaFosmidLib.0.8              | NCBI   | UC Davis                                            |
| <b>Amborellales</b>    |                                                    |                    |                                  |        |                                                     |
| 381                    | <i>Amborella trichopoda</i>                        | Amborellaceae      | AMTR1.0                          | NCBI   | Amborella Genome Sequencing Project                 |
| <b>Alismatales</b>     |                                                    |                    |                                  |        |                                                     |
| 382                    | <i>Spirodela polyrhiza</i>                         | Greater duckweed   | Spirodela_polyrhiza_<br>v01      | NCBI   | Waksman Institute                                   |
| <b>Arecales</b>        |                                                    |                    |                                  |        |                                                     |
| 383                    | <i>Phoenix dactylifera</i>                         | Date palm          | DPV01                            | NCBI   | Joint Center for Genomics Research                  |
| 384                    | <i>Elaeis oleifera</i>                             | American oil palm  | EO8                              | NCBI   | Orion Genomics                                      |
| <b>Zingiberales</b>    |                                                    |                    |                                  |        |                                                     |
| 385                    | <i>Ensete ventricosum</i>                          | Ethiopian banana   | v1.1                             | NCBI   | University of Exeter                                |
| 386                    | <i>Musa acuminata</i> subsp.<br><i>malaccensis</i> | -                  | ASM31385v1                       | NCBI   | Genoscope/IG/CEA                                    |
| <b>Poales</b>          |                                                    |                    |                                  |        |                                                     |
| 387                    | <i>Sorghum bicolor</i>                             | Sorghum            | Sorbi1                           | NCBI   | Sorghum Consortium                                  |
| 388                    | <i>Zea mays</i>                                    | Maize              | B73 RefGen_v3                    | NCBI   | Maize Genome Sequencing Project                     |
| 389                    | <i>Setaria italica</i>                             | Foxtail millet     | Setaria V1                       | NCBI   | JGI                                                 |
| 390                    | <i>Brachypodium distachyon</i>                     | Purple false brome | v1.0                             | NCBI   | JGI and The International Brachypodium Initiative   |
| 391                    | <i>Leersia perrieri</i>                            | -                  | Lperr_V1.4                       | NCBI   | Arizona Genomics Institute                          |
| 392                    | <i>Oryza barthii</i>                               | Rice               | O.barthii_v1.3                   | NCBI   | Oryza Chr3 Short Arm Comparative Sequencing Project |
| 393                    | <i>Oryza brachyantha</i>                           | -                  | Oryza_brachyantha.<br>v1.4b      | NCBI   | The Institute of Genetics and Developmental Biology |
| 394                    | <i>Oryza glumipatula</i>                           | -                  | Oryza_glumaepatula_<br>v1.5      | NCBI   | OMAP                                                |
| 395                    | <i>Oryza longistaminata</i>                        | -                  | O.longistaminata_v1.0            | NCBI   | BGI                                                 |
| 396                    | <i>Oryza meridionalis</i>                          | -                  | Oryza_meridionalis_<br>v1.3      | NCBI   | OMAP                                                |

| No               | Systematic Name                       | Common Name           | Genome Version            | Source | Submitter                                                    |
|------------------|---------------------------------------|-----------------------|---------------------------|--------|--------------------------------------------------------------|
| 397              | <i>Oryza nivara</i>                   | -                     | Oryza_nivara_v1.0         | NCBI   | OMAP                                                         |
| 398              | <i>Oryza punctata</i>                 | -                     | Oryza_punctata_v1.2       | NCBI   | OMAP                                                         |
| 399              | <i>Oryza sativa Japonica Group</i>    | -                     | Build 4.0                 | NCBI   | International Rice Genome Sequencing Project                 |
| 400              | <i>Zizania latifolia</i>              | Manchurian wild rice  | Zizania_latifolia_v01     | NCBI   | Zhejiang University                                          |
| 401              | <i>Aegilops tauschii</i>              | Tausch's goatgrass    | ASM34733v1                | NCBI   | BGI                                                          |
| 402              | <i>Triticum urartu</i>                | Wild einkorn          | ASM34745v1                | NCBI   | BGI                                                          |
| <b>Proteales</b> |                                       |                       |                           |        |                                                              |
| 403              | <i>Nelumbo nucifera</i>               | Sacred lotus          | Chinese Lotus 1.1         | NCBI   | UIUC                                                         |
| <b>Fabales</b>   |                                       |                       |                           |        |                                                              |
| 404              | <i>Lupinus angustifolius</i>          | Blue lupin            | Lupin genome scaffold     | NCBI   | Department of Agriculture and Food, WA government, Australia |
| 405              | <i>Phaseolus vulgaris</i>             | Common bean           | PhaVulg1.0                | NCBI   | JGI                                                          |
| 406              | <i>Cajanus cajan</i>                  | Pigeon pea            | Cajanus_cajan_Asha_ver1.0 | NCBI   | AKI-PGI                                                      |
| 407              | <i>Vigna angularis var. angularis</i> | Adzuki bean           | Vigna angularis           | NCBI   | SNU                                                          |
| 408              | <i>Vigna radiata var. radiata</i>     | -                     | Vradiata_ver6             | NCBI   | SNU                                                          |
| 409              | <i>Glycine max</i>                    | Soybean               | V1.1                      | NCBI   | JGI                                                          |
| 410              | <i>Glycine soja</i>                   | -                     | W05v1.0                   | NCBI   | CUHK                                                         |
| 411              | <i>Cicer arietinum</i>                | Chickpea              | ASM33114v1                | NCBI   | BGI                                                          |
| 412              | <i>Medicago truncatula</i>            | Barrel clover         | MedtrA17.3.5              | NCBI   | International Medicago Genome Annotation Group               |
| 413              | <i>Trifolium pratense</i>             | Red clover            | Tp1.0                     | NCBI   | Masaryk University                                           |
| 414              | <i>Lotus japonicus</i>                | Birdsfoot trefoil     | ASM18111v1                | NCBI   | KDRI                                                         |
| <b>Rosales</b>   |                                       |                       |                           |        |                                                              |
| 415              | <i>Malus x domestica</i>              | Apple                 | MalDomGD1.0               | NCBI   | IASMA research center                                        |
| 416              | <i>Pyrus x bretschneideri</i>         | Chinese white pear    | Pbr_v1.0                  | NCBI   | Nanjing Agricultural University                              |
| 417              | <i>Prunus mume</i>                    | Japanese apricot      | P.mume_V1.0               | NCBI   | BGI                                                          |
| 418              | <i>Prunus persica</i>                 | Peach                 | Prupe1_0                  | NCBI   | JGI                                                          |
| 419              | <i>Fragaria iinumae</i>               | Japanese strawberry   | FILr1.1                   | NCBI   | KDRI                                                         |
| 420              | <i>Fragaria nubicola</i>              | Himalayan strawberry  | FNU_r1.1                  | NCBI   | KDRI                                                         |
| 421              | <i>Fragaria orientalis</i>            | Wild asian strawberry | FOR_r1.1                  | NCBI   | KDRI                                                         |
| 422              | <i>Fragaria vesca subsp. vesca</i>    | Woodland strawberry   | FraVesHawaii_1.0          | NCBI   | Virginia Bioinformatics Institute                            |
| 423              | <i>Fragaria x ananassa</i>            | Garden strawberry     | FANhybrid_r1.2            | NCBI   | KDRI                                                         |
| 424              | <i>Morus notabilis</i>                | Mulberry tree         | ASM41409v2                | NCBI   | BGI                                                          |
| 425              | <i>Cannabis sativa</i>                | Cannabis              | canSat3                   | NCBI   | University of Toronto                                        |
| <b>Fagales</b>   |                                       |                       |                           |        |                                                              |
| 426              | <i>Castanea mollissima</i>            | Chinese chestnut      | ASM76360v1                | NCBI   | Clemson University Genomics Institute                        |

| No                  | Systematic Name                                                      | Common Name      | Genome Version                   | Source | Submitter                                                                                                                |
|---------------------|----------------------------------------------------------------------|------------------|----------------------------------|--------|--------------------------------------------------------------------------------------------------------------------------|
| 427                 | <i>Betula nana</i>                                                   | Dwarf birch      | ASM32700v1                       | NCBI   | QMUL                                                                                                                     |
| <b>Cucurbitales</b> |                                                                      |                  |                                  |        |                                                                                                                          |
| 428                 | <i>Cucumis melo</i>                                                  | Muskmelon        | ASM31304v1                       | NCBI   | Genetica Molecular,<br>Centre de Recerca en<br>Agrigenomica                                                              |
| 429                 | <i>Cucumis sativus</i>                                               | Cucumber         | CucSat_1.0                       | NCBI   | The Cucumber<br>Genome Initiative                                                                                        |
| 430                 | <i>Citrullus lanatus</i>                                             | Watermelon       | CiLa_1.0                         | NCBI   | National Engineering<br>Research Center for<br>Vegetables, Beijing<br>Academy of<br>Agriculture and<br>Forestry Sciences |
| 431                 | <i>Lagenaria siceraria</i>                                           | Calabash         | Bottle_gourd                     | NCBI   | Institute of Vegetables,<br>Zhejiang Academy of<br>Agricultural Sciences                                                 |
| <b>Malpighiales</b> |                                                                      |                  |                                  |        |                                                                                                                          |
| 432                 | <i>Populus euphratica</i>                                            | Desert poplar    | PopEup_1.0                       | NCBI   | Lanzhou University                                                                                                       |
| 433                 | <i>Populus trichocarpa</i>                                           | Black cottonwood | Poptr2.0                         | NCBI   | JGI                                                                                                                      |
| 434                 | <i>Jatropha curcas</i>                                               | Physic nut       | JatCur_1.0                       | NCBI   | Chinese Academy of<br>Sciences                                                                                           |
| 435                 | <i>Manihot esculenta</i><br><i>subsp. flabellifolia</i>              | -                | MW_v2d                           | NCBI   | The Cassava Genome<br>Consortium                                                                                         |
| 436                 | <i>Ricinus communis</i>                                              | Castor oil plant | JCVI.RCG.1.1                     | NCBI   | JCVI                                                                                                                     |
| 437                 | <i>Linum usitatissimum</i>                                           | Flax             | LinUsi_v1.1                      | NCBI   | TUFGEN                                                                                                                   |
| <b>Myrtales</b>     |                                                                      |                  |                                  |        |                                                                                                                          |
| 438                 | <i>Eucalyptus</i><br><i>camaldulensis</i>                            | River red gum    | EUC_r1.0                         | NCBI   | KDRI                                                                                                                     |
| 439                 | <i>Eucalyptus grandis</i>                                            | Rose gum         | Egrandis1.0                      | NCBI   | Geneglob                                                                                                                 |
| <b>Brassicales</b>  |                                                                      |                  |                                  |        |                                                                                                                          |
| 440                 | <i>Carica papaya</i>                                                 | Papaya           | Papaya1.0                        | NCBI   | The Papaya Genome<br>Sequencing<br>Consortium                                                                            |
| 441                 | <i>Arabidopsis halleri</i><br><i>subsp. gemmifera</i>                | -                | Ahal_1.0                         | NCBI   | TokyoTech                                                                                                                |
| 442                 | <i>Arabidopsis lyrata</i><br><i>subsp. lyrata</i>                    | -                | v.1.0                            | NCBI   | JGI                                                                                                                      |
| 443                 | <i>Arabidopsis thaliana</i>                                          | -                | TAIR10                           | NCBI   | The Arabidopsis<br>Information Resource                                                                                  |
| 444                 | <i>Camelina sativa</i>                                               | Camelina         | Cs                               | NCBI   | Agriculture &<br>AgriFood Canada                                                                                         |
| 445                 | <i>Capsella rubella</i>                                              | Capsella         | Caprub1.0                        | NCBI   | JGI                                                                                                                      |
| 446                 | <i>Brassica napus</i>                                                | Rapeseed         | Brassica_napus_<br>assembly_v1.0 | NCBI   | BGI                                                                                                                      |
| 447                 | <i>Brassica oleracea var.</i><br><i>oleracea</i>                     | -                | BOL                              | NCBI   | CanSeq                                                                                                                   |
| 448                 | <i>Brassica rapa</i>                                                 | Field mustard    | Brapa_1.0                        | NCBI   | Brassica rapa Genome<br>Sequencing Project,<br>BraGSP                                                                    |
| 449                 | <i>Raphanus</i><br><i>raphanistrum subsp.</i><br><i>raphanistrum</i> | -                | ASM76984v1                       | NCBI   | Michigan State<br>University                                                                                             |

| No                    | Systematic Name                      | Common Name         | Genome Version           | Source | Submitter                                             |
|-----------------------|--------------------------------------|---------------------|--------------------------|--------|-------------------------------------------------------|
| 450                   | <i>Raphanus sativus</i>              | Radish              | ASM80110v1               | NCBI   | Myongji University                                    |
| 451                   | <i>Aethionema arabicum</i>           | -                   | VEGL_AA_v.1.0            | NCBI   | McGill                                                |
| 452                   | <i>Arabis alpina</i>                 | Alpine rockcress    | A_alpina_V4              | NCBI   | TRANSNET                                              |
| 453                   | <i>Eutrema parvulum</i>              | -                   | Eutrema_parvulum_v01     | NCBI   | University of Illinois                                |
| 454                   | <i>Eutrema salsugineum</i>           | Saltwater cress     | Eutsalg1.0               | NCBI   | JGI                                                   |
| 455                   | <i>Sisymbrium irio</i>               | London rocket       | VEGL_SI_v.1.0            | NCBI   | McGill                                                |
| 456                   | <i>Leavenworthia alabamica</i>       | Alabama glade cress | VEGLLA_v.1.0             | NCBI   | McGill                                                |
| 457                   | <i>Tarenaya hassleriana</i>          | Pink queen          | ASM46358v1               | NCBI   | BGI                                                   |
| <b>Malvales</b>       |                                      |                     |                          |        |                                                       |
| 458                   | <i>Gossypium arboreum</i>            | Tree cotton         | Gossypium_arboreum_v1.0  | NCBI   | BGI                                                   |
| 459                   | <i>Gossypium raimondii</i>           | New world cotton    | Graimondii2.0            | NCBI   | JGI                                                   |
| 460                   | <i>Theobroma cacao</i>               | Cacao               | Theobroma_cacao_20110822 | NCBI   | Cacao Genome Consortium                               |
| 461                   | <i>Aquilaria agallochum</i>          | -                   | Aquilaria_agallocha_v1   | NCBI   | Academia Sinica                                       |
| <b>Sapindales</b>     |                                      |                     |                          |        |                                                       |
| 462                   | <i>Azadirachta indica</i>            | Indian lilac        | AzaInd2.0                | NCBI   | Centre for Cellular and Molecular Platforms           |
| 463                   | <i>Citrus clementine</i>             | Clementine          | Citrus_clementina_v1.0   | NCBI   | International Citrus Genome Consortium                |
| 464                   | <i>Citrus sinensis</i>               | Orange              | Csi_valencia_1.0         | NCBI   | China Sweet Orange Genome Project                     |
| <b>Vitales</b>        |                                      |                     |                          |        |                                                       |
| 465                   | <i>Vitis vinifera</i>                | Common grape vine   | 12X                      | NCBI   | International Grape Genome Program                    |
| <b>Caryophyllales</b> |                                      |                     |                          |        |                                                       |
| 466                   | <i>Amaranthus hypochondriacus</i>    | Prince's feather    | AHP 1.0                  | NCBI   | Institute of Bioinformatics and Applied Biotechnology |
| 467                   | <i>Amaranthus tuberculatus</i>       | Tall waterhemp      | ASM18065v1               | NCBI   | University of Illinois                                |
| 468                   | <i>Beta vulgaris subsp. vulgaris</i> | -                   | RefBeet-1.2.1            | NCBI   | Beta vulgaris Resource                                |
| 469                   | <i>Spinacia oleracea</i>             | Spinach             | Viroflay-1.0.1           | NCBI   | BeetSeq                                               |
| 470                   | <i>Dianthus caryophyllus</i>         | Clove pink          | DCA_r1.0                 | NCBI   | KDRI                                                  |
| <b>Ericales</b>       |                                      |                     |                          |        |                                                       |
| 471                   | <i>Actinidia chinensis</i>           | Kiwi fruit          | Kiwifruit_v1             | NCBI   | Boyce Thompson Institute                              |
| 472                   | <i>Vaccinium macrocarpon</i>         | Large cranberry     | ASM77533v1               | NCBI   | Rutgers University                                    |
| 473                   | <i>Diospyros lotus</i>               | Caucasian persimmon | ASM77412v1               | NCBI   | University of California Davis                        |
| 474                   | <i>Primula veris</i>                 | Cowslip             | ASM78844v1               | NCBI   | University of Zurich                                  |
| <b>Solanales</b>      |                                      |                     |                          |        |                                                       |
| 475                   | <i>Solanum arcanum</i>               | -                   | Soarc10                  | NCBI   | PRI                                                   |
| 476                   | <i>Solanum habrochaites</i>          | -                   | Sohab10                  | NCBI   | PRI                                                   |
| 477                   | <i>Solanum lycopersicum</i>          | Tomato              | SL2.40                   | NCBI   | Solanaceae Genomics Project                           |
| 478                   | <i>Solanum melongena</i>             | Eggplant            | SME_r2.5.1               | NCBI   | KDRI                                                  |
| 479                   | <i>Solanum pennellii</i>             | -                   | Sopen10                  | NCBI   | PRI                                                   |

| No                    | Systematic Name                      | Common Name            | Genome Version | Source | Submitter                                                                    |
|-----------------------|--------------------------------------|------------------------|----------------|--------|------------------------------------------------------------------------------|
| 480                   | <i>Solanum pimpinellifolium</i>      | Currant tomato         | Sol_pimpi_v1.0 | NCBI   | Sol Genomics Network                                                         |
| 481                   | <i>Solanum tuberosum</i>             | Potato                 | SolTub_3.0     | NCBI   | Potato Genome Sequencing Consortium                                          |
| 482                   | <i>Capsicum annuum</i>               | Hot pepper             | PGAv.1.5       | NCBI   | SNU                                                                          |
| 483                   | <i>Nicotiana sylvestris</i>          | Woodland tobacco       | Nsyl           | NCBI   | Philip Morris International R&D                                              |
| 484                   | <i>Nicotiana tomentosiformis</i>     | -                      | Ntom_v01       | NCBI   | Philip Morris International R&D                                              |
| <b>Lamiales</b>       |                                      |                        |                |        |                                                                              |
| 485                   | <i>Fraxinus excelsior</i>            | European ash           | BATG-0.4       | NCBI   | QMUL                                                                         |
| 486                   | <i>Penstemon centranthifolius</i>    | Scarlet bugler         | ASM73743v1     | NCBI   | Ohio State University                                                        |
| 487                   | <i>Penstemon grinnellii</i>          | Grinnell's beardtongue | ASM73742v1     | NCBI   | Ohio State University                                                        |
| 488                   | <i>Sesamum indicum</i>               | Sesame                 | S_indicum_v1.0 | NCBI   | Oil Crops Research Institute of the Chinese Academy of Agricultural Sciences |
| 489                   | <i>Genlisea aurea</i>                | Corkscrew plant        | GenAur_1.0     | NCBI   | Lomonosov Moscow State University, Evolutionary Genomics Laboratory          |
| 490                   | <i>Mimulus guttatus</i>              | Common monkey-flower   | Mimgu1.0       | NCBI   | JGI                                                                          |
| <b>Asterales</b>      |                                      |                        |                |        |                                                                              |
| 491                   | <i>Conyza canadensis</i>             | Horseweed              | ASM77593v1     | NCBI   | University of Tennessee                                                      |
| <b>ECHINOIDEA</b>     |                                      |                        |                |        |                                                                              |
| <b>Temnopleuroida</b> |                                      |                        |                |        |                                                                              |
| 492                   | <i>Lytechinus variegatus</i>         | Green sea urchin       | Lvar_0.4       | NCBI   | BCM                                                                          |
| <b>Echinoida</b>      |                                      |                        |                |        |                                                                              |
| 493                   | <i>Strongylocentrotus purpuratus</i> | Purple sea urchin      | Spur_3.1       | NCBI   | BCM                                                                          |
| <b>ASTEROIDEA</b>     |                                      |                        |                |        |                                                                              |
| <b>Valvatida</b>      |                                      |                        |                |        |                                                                              |
| 494                   | <i>Patiria miniata</i>               | Bat star               | Pmin_1.0       | NCBI   | Sea Urchin Genome Sequencing Consortium                                      |
| <b>ENTEROPNEUSTA</b>  |                                      |                        |                |        |                                                                              |
| 495                   | <i>Saccoglossus kowalevskii</i>      | Acorn worm             | Skow_1.1       | NCBI   | BCM                                                                          |
| <b>TUNICATA</b>       |                                      |                        |                |        |                                                                              |
| <b>Enterogona</b>     |                                      |                        |                |        |                                                                              |
| 496                   | <i>Ciona intestinalis</i>            | Sea squirt             | KH             | NCBI   | Organization: Department of Zoology, Graduate School                         |
| 497                   | <i>Ciona savignyi</i>                | -                      | ASM14926v1     | NCBI   | Broad                                                                        |
| <b>Pleurogona</b>     |                                      |                        |                |        |                                                                              |

| No                        | Systematic Name                  | Common Name    | Genome Version           | Source | Submitter           |
|---------------------------|----------------------------------|----------------|--------------------------|--------|---------------------|
| 498                       | <i>Botryllus schlosseri</i>      | Star ascidian  | 356a-chromosome-assembly | NCBI   | Stanford University |
| <b>Copelata</b>           |                                  |                |                          |        |                     |
| 499                       | <i>Oikopleura dioica</i>         | Larvaceans     | ASM20953v1               | NCBI   | Genoscope CEA       |
| <b>LEPTOCARDII</b>        |                                  |                |                          |        |                     |
| <b>Amphioxiformes</b>     |                                  |                |                          |        |                     |
| 500                       | <i>Branchiostoma floridae</i>    | Lancelet       | Version 2                | NCBI   | JGI                 |
| <b>CEPHALASPIDOMORPHI</b> |                                  |                |                          |        |                     |
| <b>Petromyzontiformes</b> |                                  |                |                          |        |                     |
| 501                       | <i>Lethenteron camtschaticum</i> | Arctic lamprey | LetJap1.0                | NCBI   | IMCB                |
| 502                       | <i>Petromyzon marinus</i>        | Sea lamprey    | petMar2                  | UCSC   | WashU               |
| <b>SARCOPTERYGII</b>      |                                  |                |                          |        |                     |
| <b>Coelacanthiformes</b>  |                                  |                |                          |        |                     |
| 503                       | <i>Latimeria chalumnae</i>       | Coelacanth     | latCha1                  | UCSC   | Broad               |



## 2.1.2 Figure 1: Phylogenetic representation of the genomic dataset

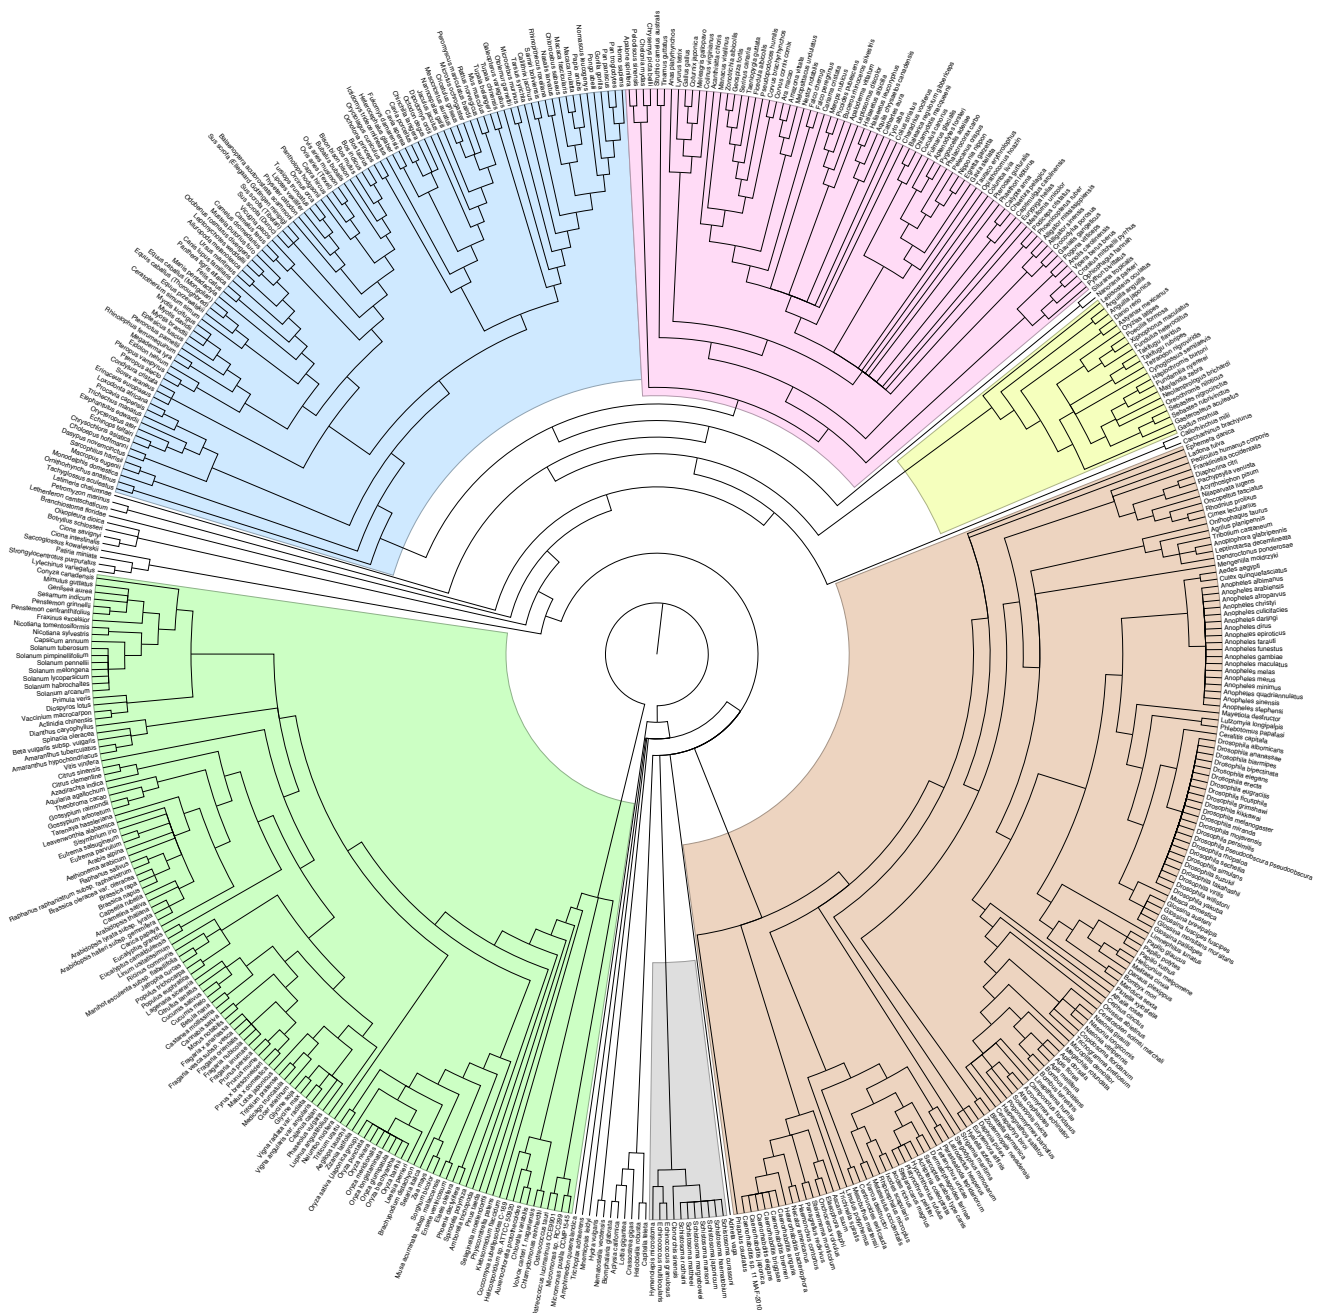

Figure 1: **Inferred tree of life:** Phylogenetic inference of the genomic dataset representing the eukaryotic tree of life. This tree was built using Archaeopteryx to download the Tree of Life (tolweb.org) topology for all Eukaryota (node identifier 3, about 76,000 species). The tree was extended to include required descendant species, extract the 503 species of interest, and update ambiguous branches based on the most recent literature.

### 2.1.3 Tables 2, 3: Genome assembly quality check

Table 2: **Assembly statistics:** Shows the systematic name, total sequence length (i.e. genome size, including bases and gaps), scaffold N50 (i.e. scaffold length at which 50% of the total bases in the assembly are in scaffolds of that length or greater), contig N50 and assembly level (complete genome, chromosome, scaffold or contig). Species are listed in the same order as Table 1. Statistics for the publicly available genomes can be found on NCBI ([www.ncbi.nlm.nih.gov/](http://www.ncbi.nlm.nih.gov/) → Assembly → look up the genome of interest → GenBank FTP site → \*\_assembly\_stats.txt file).

| No              | Species                               | Total Sequence Length | Scaffold N50 | Contig N50 | Assembly Level |
|-----------------|---------------------------------------|-----------------------|--------------|------------|----------------|
| <b>MAMMALIA</b> |                                       |                       |              |            |                |
| 1               | <i>Tachyglossus aculeatus</i>         | -                     | -            | -          | Contig         |
| 2               | <i>Ornithorhynchus anatinus</i>       | 1,995,607,322         | 958,970      | 11,554     | Chromosome     |
| 3               | <i>Monodelphis domestica</i>          | 3,598,443,077         | 59,809,810   | 108,014    | Chromosome     |
| 4               | <i>Macropus eugenii</i>               | 3,075,184,024         | 36,602       | 2,602      | Scaffold       |
| 5               | <i>Sarcophilus harrisii</i>           | 3,174,693,010         | 1,847,106    | 20,139     | Scaffold       |
| 6               | <i>Dasypus novemcinctus</i>           | 3,631,522,711         | 1,687,935    | 26,277     | Scaffold       |
| 7               | <i>Choloepus hoffmanni</i>            | 2,458,927,620         | 9,667        | 2,343      | Scaffold       |
| 8               | <i>Chrysochloris asiatica</i>         | 4,210,110,458         | 13,470,186   | 19,631     | Scaffold       |
| 9               | <i>Echinops telfairi</i>              | 2,947,024,286         | 45,764,842   | 20,428     | Scaffold       |
| 10              | <i>Orycteropus afer afer</i>          | 4,444,080,527         | 7,875,832    | 17,683     | Scaffold       |
| 11              | <i>Elephantulus edwardii</i>          | 3,843,982,861         | 15,011,382   | 24,219     | Scaffold       |
| 12              | <i>Trichechus manatus latirostris</i> | 3,103,808,406         | 14,442,683   | 37,750     | Scaffold       |
| 13              | <i>Procavia capensis</i>              | 2,985,258,999         | 24,297       | 3,379      | Scaffold       |
| 14              | <i>Loxodonta africana</i>             | -                     | -            | -          | Chromosome     |
| 15              | <i>Erinaceus europaeus</i>            | 2,715,720,925         | 3,264,618    | 21,359     | Scaffold       |
| 16              | <i>Sorex araneus</i>                  | 2,423,158,183         | 22,794,405   | 22,623     | Scaffold       |
| 17              | <i>Condylura cristata</i>             | 1,769,662,895         | 55,520,359   | 46,163     | Scaffold       |
| 18              | <i>Pteropus alecto</i>                | 1,985,975,446         | 15,954,802   | 31,841     | Scaffold       |
| 19              | <i>Pteropus vampyrus</i>              | 1,996,076,410         | 124,060      | 8,527      | Scaffold       |
| 20              | <i>Eidolon helvum</i>                 | 1,837,754,460         | 27,684       | 12,668     | Scaffold       |
| 21              | <i>Megaderma lyra</i>                 | 1,735,931,796         | 16,881       | 7,043      | Scaffold       |
| 22              | <i>Rhinolophus ferrumequinum</i>      | 1,926,439,238         | 21,151       | 11,659     | Scaffold       |
| 23              | <i>Pteronotus parnellii</i>           | 1,960,317,893         | 22,675       | 9,502      | Scaffold       |
| 24              | <i>Eptesicus fuscus</i>               | 2,026,629,342         | 13,454,942   | 21,392     | Scaffold       |
| 25              | <i>Myotis brandtii</i>                | 2,107,242,811         | 3,225,832    | 23,289     | Scaffold       |
| 26              | <i>Myotis davidii</i>                 | 2,059,799,708         | 3,454,484    | 15,182     | Scaffold       |
| 27              | <i>Myotis lucifugus</i>               | 2,034,575,300         | 4,293,315    | 64,330     | Scaffold       |
| 28              | <i>Ceratotherium simum simum</i>      | 2,464,367,180         | 26,277,727   | 92,960     | Scaffold       |
| 29              | <i>Equus przewalskii</i>              | 2,395,954,271         | 513,800      | 57,610     | Scaffold       |
| 30              | <i>Equus caballus</i> (Thoroughbred)  | 2,474,929,062         | 46,749,900   | 112,381    | Chromosome     |
| 31              | <i>Equus caballus</i> (Mongolian)     | 2,377,506,909         | 56,256       | 40,738     | Scaffold       |
| 32              | <i>Manis pentadactyla</i>             | 2,204,732,179         | 117,920      | 28,718     | Scaffold       |
| 33              | <i>Felis catus</i>                    | 2,641,342,258         | 18,072,971   | 45,189     | Chromosome     |
| 34              | <i>Panthera tigris altaica</i>        | 2,391,082,183         | 8,860,407    | 30,032     | Scaffold       |
| 35              | <i>Canis lupus familiaris</i>         | 2,410,976,875         | 45,876,610   | 267,478    | Chromosome     |
| 36              | <i>Ursus maritimus</i>                | 2,301,379,344         | 15,940,661   | 46,506     | Scaffold       |

| No | Species                                         | Total Sequence Length | Scaffold N50 | Contig N50 | Assembly Level |
|----|-------------------------------------------------|-----------------------|--------------|------------|----------------|
| 37 | <i>Ailuropoda melanoleuca</i>                   | 2,299,492,210         | 1,281,781    | 39,886     | Scaffold       |
| 38 | <i>Leptonychotes weddellii</i>                  | 3,156,902,762         | 904,031      | 23,664     | Scaffold       |
| 39 | <i>Odobenus rosmarus divergens</i>              | 2,400,150,193         | 2,616,778    | 89,951     | Scaffold       |
| 40 | <i>Mustela putorius furo</i>                    | 2,410,879,678         | 9,335,154    | 44,823     | Scaffold       |
| 41 | <i>Camelus dromedarius</i>                      | 2,004,063,690         | 4,188,677    | 69,131     | Scaffold       |
| 42 | <i>Camelus ferus</i>                            | 2,009,194,609         | 2,005,940    | 90,263     | Scaffold       |
| 43 | <i>Vicugna pacos</i>                            | 2,172,191,320         | 7,263,804    | 24,617     | Scaffold       |
| 44 | <i>Sus scrofa</i> (Duroc)                       | 2,808,525,991         | 576,008      | 69,474     | Chromosome     |
| 45 | <i>Sus scrofa</i> (Tibetan)                     | 2,489,155,924         | 1,054,539    | 45,705     | Scaffold       |
| 46 | <i>Sus scrofa</i> (Ellegaard Gottingen minipig) | 2,358,017,222         | -            | 22,008     | Contig         |
| 47 | <i>Balaenoptera acutorostrata scammoni</i>      | 2,431,687,698         | 12,843,668   | 22,690     | Scaffold       |
| 48 | <i>Physeter catodon</i>                         | 2,280,727,784         | 427,290      | 35,257     | Scaffold       |
| 49 | <i>Lipotes vexillifer</i>                       | 2,429,212,129         | 2,419,148    | 31,902     | Scaffold       |
| 50 | <i>Tursiops truncatus</i>                       | 2,551,418,184         | 116,287      | 11,821     | Scaffold       |
| 51 | <i>Orcinus orca</i>                             | 2,372,919,875         | 12,735,091   | 70,300     | Scaffold       |
| 52 | <i>Panholops hodgsonii</i>                      | 2,696,886,330         | 2,772,860    | 18,674     | Scaffold       |
| 53 | <i>Capra hircus</i>                             | 2,635,848,900         | 14,391,519   | 18,934     | Chromosome     |
| 54 | <i>Ovis aries</i> (Texel)                       | 2,619,054,388         | 100,079,507  | 40,376     | Chromosome     |
| 55 | <i>Ovis aries musimon</i>                       | 2,589,834,840         | 2,217,029    | 39,721     | Scaffold       |
| 56 | <i>Bubalus bubalis</i>                          | 2,836,166,969         | 1,412,388    | 21,938     | Scaffold       |
| 57 | <i>Bison bison bison</i>                        | 2,828,031,685         | 7,192,658    | 19,971     | Scaffold       |
| 58 | <i>Bos mutus</i>                                | 2,645,161,911         | 1,407,960    | 22,822     | Scaffold       |
| 59 | <i>Bos indicus</i>                              | 2,673,949,103         | -            | 28,375     | Chromosome     |
| 60 | <i>Bos taurus</i>                               | 2,670,422,299         | 6,380,747    | 96,951     | Chromosome     |
| 61 | <i>Ochotona princeps</i>                        | 2,229,840,584         | 26,863,993   | 42,347     | Scaffold       |
| 62 | <i>Oryctolagus cuniculus</i>                    | 2,737,445,565         | 35,972,871   | 64,648     | Chromosome     |
| 63 | <i>Ictidomys tridecemlineatus</i>               | 2,478,393,770         | 8,192,786    | 44,137     | Scaffold       |
| 64 | <i>Heterocephalus glaber</i>                    | 2,618,204,639         | 20,532,749   | 47,778     | Scaffold       |
| 65 | <i>Fukomys damarensis</i>                       | 2,333,892,479         | 5,314,287    | 44,830     | Scaffold       |
| 66 | <i>Cavia aperea</i>                             | 2,716,396,567         | -            | 1,039      | Scaffold       |
| 67 | <i>Cavia porcellus</i>                          | 2,723,219,641         | 27,942,054   | 80,583     | Scaffold       |
| 68 | <i>Chinchilla lanigera</i>                      | 2,390,868,971         | 21,893,125   | 61,105     | Scaffold       |
| 69 | <i>Octodon degus</i>                            | 2,995,889,303         | 12,091,372   | 19,847     | Scaffold       |
| 70 | <i>Dipodomys ordii</i>                          | 2,158,502,098         | 36,427       | 4,288      | Scaffold       |
| 71 | <i>Jaculus jaculus</i>                          | 2,835,250,225         | 22,080,993   | 15,675     | Scaffold       |
| 72 | <i>Nannospalax galili</i>                       | 3,061,424,619         | 3,618,479    | 30,353     | Scaffold       |
| 73 | <i>Mesocricetus auratus</i>                     | 2,504,925,039         | 12,753,307   | 22,511     | Scaffold       |
| 74 | <i>Cricetulus griseus</i>                       | 2,399,786,748         | 1,147,233    | 39,361     | Scaffold       |
| 75 | <i>Microtus ochrogaster</i>                     | 2,287,340,943         | 17,270,019   | 21,250     | Chromosome     |
| 76 | <i>Peromyscus maniculatus bairdii</i>           | 2,630,541,020         | 3,760,915    | 36,367     | Scaffold       |
| 77 | <i>Rattus norvegicus</i>                        | 2,909,698,938         | 2,178,346    | 52,491     | Chromosome     |
| 78 | <i>Mus musculus</i>                             | 2,798,785,524         | 52,589,046   | 32,273,079 | Chromosome     |
| 79 | <i>Tupaia belangeri</i>                         | 2,137,225,476         | -            | 2,974      | Contig         |
| 80 | <i>Tupaia chinensis</i>                         | 2,846,580,235         | 3,670,124    | 25,938     | Scaffold       |
| 81 | <i>Galeopterus variegatus</i>                   | 3,187,660,572         | 245,189      | 20,752     | Scaffold       |

| No                | Species                                | Total Sequence Length | Scaffold N50 | Contig N50 | Assembly Level |
|-------------------|----------------------------------------|-----------------------|--------------|------------|----------------|
| 82                | <i>Otolemur garnettii</i>              | 2,519,724,550         | 13,852,661   | 27,100     | Scaffold       |
| 83                | <i>Microcebus murinus</i>              | 2,902,270,736         | 140,884      | 3,511      | Scaffold       |
| 84                | <i>Tarsius syrichta</i>                | 3,453,864,774         | 401,181      | 38,165     | Scaffold       |
| 85                | <i>Callithrix jacchus</i>              | 2,914,958,544         | 5,167,444    | 29,273     | Chromosome     |
| 86                | <i>Saimiri boliviensis boliviensis</i> | 2,608,588,537         | 18,744,880   | 38,823     | Scaffold       |
| 87                | <i>Rhinopithecus roxellana</i>         | 2,899,552,139         | 1,549,224    | 77,151     | Scaffold       |
| 88                | <i>Nasalis larvatus</i>                | 3,011,966,170         | -            | 13,295     | Chromosome     |
| 89                | <i>Chlorocebus sabaeus</i>             | 2,789,656,328         | 81,825,804   | 90,449     | Chromosome     |
| 90                | <i>Macaca fascicularis</i>             | 2,946,843,737         | 88,649,475   | 86,040     | Chromosome     |
| 91                | <i>Macaca mulatta</i>                  | 2,969,971,616         | 1,660,975    | 12,841     | Chromosome     |
| 92                | <i>Papio anubis</i>                    | 2,948,397,226         | 528,927      | 40,262     | Chromosome     |
| 93                | <i>Nomascus leucogenys</i>             | 2,962,060,179         | 52,956,880   | 35,148     | Chromosome     |
| 94                | <i>Pongo abelii</i>                    | 3,441,244,233         | 747,460      | 15,648     | Chromosome     |
| 95                | <i>Gorilla gorilla gorilla</i>         | 3,035,660,144         | 913,458      | 11,661     | Chromosome     |
| 96                | <i>Pan paniscus</i>                    | 2,869,190,071         | 10,124,892   | 66,749     | Chromosome     |
| 97                | <i>Pan troglodytes</i>                 | 3,323,267,922         | 8,925,874    | 50,656     | Chromosome     |
| 98                | <i>Homo sapiens</i>                    | 3,137,144,693         | 46,395,641   | 38,508,932 | Chromosome     |
| <b>SAUROPSIDA</b> |                                        |                       |              |            |                |
| 99                | <i>Apalone spinifera</i>               | 1,931,078,847         | 2,306,994    | 4,693      | Scaffold       |
| 100               | <i>Pelodiscus sinensis</i>             | 2,202,483,752         | 3,350,749    | 21,993     | Scaffold       |
| 101               | <i>Chelonia mydas</i>                  | 2,208,410,377         | 3,864,108    | 29,240     | Scaffold       |
| 102               | <i>Chrysemys picta bellii</i>          | 2,589,745,704         | 5,212,367    | 11,852     | Chromosome     |
| 103               | <i>Struthio camelus australis</i>      | 1,225,041,896         | 3,593,425    | 34,997     | Scaffold       |
| 104               | <i>Tinamus guttatus</i>                | 1,047,056,493         | 246,268      | 29,773     | Scaffold       |
| 105               | <i>Anas platyrhynchos</i>              | 1,105,052,351         | 1,233,631    | 26,114     | Scaffold       |
| 106               | <i>Lyrurus tetrix tetrix</i>           | 657,025,294           | -            | 1,029      | Contig         |
| 107               | <i>Gallus gallus</i>                   | 1,046,932,099         | 12,877,381   | 279,750    | Chromosome     |
| 108               | <i>Coturnix japonica</i>               | 531,959,683           | 108,813      | 1,473      | Scaffold       |
| 109               | <i>Meleagris gallopavo</i>             | 1,061,817,103         | 857,645      | 12,520     | Chromosome     |
| 110               | <i>Colinus virginianus</i>             | 1,171,855,925         | -            | 6,061      | Scaffold       |
| 111               | <i>Acanthisitta chloris</i>            | 1,035,876,403         | 64,469       | 20,602     | Scaffold       |
| 112               | <i>Manacus vitellinus</i>              | 1,145,871,783         | 2,558,866    | 43,697     | Scaffold       |
| 113               | <i>Zonotrichia albicollis</i>          | 1,052,600,561         | 4,866,725    | 112,748    | Scaffold       |
| 114               | <i>Geospiza fortis</i>                 | 1,065,292,181         | 5,255,844    | 30,521     | Scaffold       |
| 115               | <i>Serinus canaria</i>                 | 1,152,100,110         | 17,815,079   | 53,884     | Scaffold       |
| 116               | <i>Taeniopygia guttata</i>             | 1,232,135,591         | 8,236,790    | 38,639     | Chromosome     |
| 117               | <i>Ficedula albicollis</i>             | 1,118,343,587         | 6,542,656    | 410,964    | Chromosome     |
| 118               | <i>Pseudopodoces humilis</i>           | 1,042,997,632         | 16,337,386   | 165,265    | Scaffold       |
| 119               | <i>Corvus brachyrhynchos</i>           | 1,091,312,783         | 6,953,989    | 29,093     | Scaffold       |
| 120               | <i>Corvus cornix cornix</i>            | 1,049,964,851         | 16,358,221   | 94,375     | Scaffold       |
| 121               | <i>Ara macao</i>                       | 1,204,700,227         | 15,974       | 4,399      | Scaffold       |
| 122               | <i>Amazona vittata</i>                 | 1,175,404,042         | 19,239       | 6,904      | Scaffold       |
| 123               | <i>Melopsittacus undulatus</i>         | 1,117,373,619         | 10,614,383   | 55,633     | Scaffold       |
| 124               | <i>Nestor notabilis</i>                | 1,053,559,886         | 61,475       | 26,546     | Scaffold       |
| 125               | <i>Falco cherrug</i>                   | 1,174,811,715         | 4,154,532    | 31,327     | Scaffold       |
| 126               | <i>Falco peregrinus</i>                | 1,171,973,431         | 3,935,757    | 28,645     | Scaffold       |
| 127               | <i>Cariama cristata</i>                | 1,132,245,425         | 55,197       | 24,645     | Scaffold       |
| 128               | <i>Merops nubicus</i>                  | 1,062,961,556         | 48,089       | 24,675     | Scaffold       |
| 129               | <i>Picoides pubescens</i>              | 1,167,323,935         | 2,093,929    | 24,809     | Scaffold       |

| No              | Species                                | Total Sequence Length | Scaffold N50 | Contig N50 | Assembly Level |
|-----------------|----------------------------------------|-----------------------|--------------|------------|----------------|
| 130             | <i>Buceros rhinoceros silvestris</i>   | 1,065,782,791         | 53,203       | 14,587     | Scaffold       |
| 131             | <i>Apaloderma vittatum</i>             | 1,070,836,417         | 56,673       | 28,882     | Scaffold       |
| 132             | <i>Leptosomus discolor</i>             | 1,136,244,952         | 62,640       | 24,735     | Scaffold       |
| 133             | <i>Haliaeetus albicilla</i>            | 1,133,549,865         | 57,319       | 25,143     | Scaffold       |
| 134             | <i>Haliaeetus leucocephalus</i>        | 1,178,409,481         | 9,145,499    | 105,493    | Scaffold       |
| 135             | <i>Aquila chrysaetos Canadensis</i>    | 1,192,743,076         | 9,230,743    | 172,329    | Scaffold       |
| 136             | <i>Cathartes aura</i>                  | 1,152,571,117         | 36,359       | 15,248     | Scaffold       |
| 137             | <i>Tyto alba</i>                       | 1,120,143,088         | 52,818       | 17,226     | Scaffold       |
| 138             | <i>Colius striatus</i>                 | 1,075,931,597         | 46,063       | 25,860     | Scaffold       |
| 139             | <i>Charadrius vociferus</i>            | 1,219,859,583         | 3,657,050    | 39,278     | Scaffold       |
| 140             | <i>Balearica regulorum gibbericeps</i> | 1,127,622,302         | 52,178       | 23,331     | Scaffold       |
| 141             | <i>Chlamydotis macqueenii</i>          | 1,086,566,339         | 45,221       | 21,641     | Scaffold       |
| 142             | <i>Cuculus canorus</i>                 | 1,153,894,225         | 2,989,832    | 38,137     | Scaffold       |
| 143             | <i>Fulmarus glacialis</i>              | 1,141,395,646         | 47,208       | 25,926     | Scaffold       |
| 144             | <i>Aptenodytes forsteri</i>            | 1,254,347,440         | 5,071,598    | 31,730     | Scaffold       |
| 145             | <i>Pygoscelis adeliae</i>              | 1,216,617,519         | 5,118,896    | 22,195     | Scaffold       |
| 146             | <i>Phalacrocorax carbo</i>             | 1,138,967,842         | 48,427       | 17,343     | Scaffold       |
| 147             | <i>Pelecanus crispus</i>               | 1,160,924,693         | 43,364       | 21,679     | Scaffold       |
| 148             | <i>Nipponia nippon</i>                 | 1,223,863,029         | 5,211,696    | 29,116     | Scaffold       |
| 149             | <i>Egretta garzetta</i>                | 1,206,501,934         | 3,067,157    | 29,019     | Scaffold       |
| 150             | <i>Phaethon lepturus</i>               | 1,152,958,507         | 47,896       | 22,941     | Scaffold       |
| 151             | <i>Gavia stellata</i>                  | 1,129,694,867         | 45,523       | 24,321     | Scaffold       |
| 152             | <i>Tauraco erythrolophus</i>           | 1,155,540,733         | 56,334       | 22,885     | Scaffold       |
| 153             | <i>Opisthocomus hoazin</i>             | 1,203,712,246         | 2,937,227    | 28,179     | Scaffold       |
| 154             | <i>Columba livia</i>                   | 1,107,989,085         | 3,148,738    | 26,579     | Scaffold       |
| 155             | <i>Pterocles gutturalis</i>            | 1,069,324,295         | 49,530       | 26,448     | Scaffold       |
| 156             | <i>Calypte anna</i>                    | 1,105,676,412         | 4,052,191    | 26,738     | Scaffold       |
| 157             | <i>Chaetura pelagica</i>               | 1,119,188,094         | 3,841,852    | 30,757     | Scaffold       |
| 158             | <i>Caprimulgus carolinensis</i>        | 1,119,683,066         | 46,345       | 22,156     | Scaffold       |
| 159             | <i>Eurypyga helias</i>                 | 1,088,019,637         | 47,243       | 24,402     | Scaffold       |
| 160             | <i>Mesitornis unicolor</i>             | 1,087,290,853         | 47,102       | 22,740     | Scaffold       |
| 161             | <i>Podiceps cristatus</i>              | 1,134,922,578         | 30,087       | 17,412     | Scaffold       |
| 162             | <i>Phoenicopterus ruber ruber</i>      | 1,132,184,511         | 38,071       | 38,071     | Scaffold       |
| 163             | <i>Alligator mississippiensis</i>      | 2,174,259,888         | 508,966      | 36,484     | Scaffold       |
| 164             | <i>Alligator sinensis</i>              | 2,270,567,745         | 2,188,296    | 23,412     | Scaffold       |
| 165             | <i>Crocodylus porosus</i>              | 2,120,573,303         | 204,532      | 32,735     | Scaffold       |
| 166             | <i>Gavialis gangeticus</i>             | 2,188,353,730         | 100,817      | 14,195     | Scaffold       |
| 167             | <i>Pogona vitticeps</i>                | -                     | -            | -          | Contig?        |
| 168             | <i>Anolis carolinensis</i>             | 1,799,143,587         | 4,033,265    | 79,867     | Chromosome     |
| 169             | <i>Vipera berus berus</i>              | 1,532,390,814         | 126,452      | 11,725     | Scaffold       |
| 170             | <i>Crotalus mitchellii pyrrhus</i>     | 1,126,791,715         | -            | 4,103      | Scaffold       |
| 171             | <i>Ophiophagus hannah</i>              | 1,594,074,654         | -            | 5,201      | Scaffold       |
| 172             | <i>Python bivittatus</i>               | 1,435,052,152         | 213,970      | 10,658     | Scaffold       |
| <b>AMPHIBIA</b> |                                        |                       |              |            |                |
| 173             | <i>Nanorana parkeri</i>                | 2,053,849,526         | 1,069,101    | 32,798     | Scaffold       |

| No                    | Species                           | Total Sequence Length | Scaffold N50 | Contig N50 | Assembly Level |
|-----------------------|-----------------------------------|-----------------------|--------------|------------|----------------|
| 174                   | <i>Xenopus tropicalis</i>         | 1,437,530,879         | 124,127,367  | 72,201     | Scaffold       |
| <b>NEOPTERYGII</b>    |                                   |                       |              |            |                |
| 175                   | <i>Lepisosteus oculatus</i>       | 945,878,036           | 6,928,108    | 68,337     | Chromosome     |
| 176                   | <i>Anguilla anguilla</i>          | 1,018,701,900         | -            | 2,544      | Scaffold       |
| 177                   | <i>Anguilla japonica</i>          | 1,151,137,423         | 52,849       | 3,215      | Scaffold       |
| 178                   | <i>Danio rerio</i>                | 1,371,719,383         | 2,181,225    | 1,258,148  | Chromosome     |
| 179                   | <i>Astyanax mexicanus</i>         | 1,191,242,572         | 1,775,308    | 14,739     | Scaffold       |
| 180                   | <i>Oryzias latipes</i>            | 869,818,208           | 6,078,048    | 9,628      | Chromosome     |
| 181                   | <i>Poecilia formosa</i>           | 748,923,461           | 1,574,226    | 57,472     | Scaffold       |
| 182                   | <i>Xiphophorus maculatus</i>      | 729,664,433           | 1,303,070    | 22,273     | Scaffold       |
| 183                   | <i>Fundulus heteroclitus</i>      | 1,021,898,560         | 1,252,252    | 16,688     | Scaffold       |
| 184                   | <i>Takifugu flavidus</i>          | 378,032,400           | 315,240      | 8,233      | Scaffold       |
| 185                   | <i>Takifugu rubripes</i>          | 391,484,725           | 928,938      | 52,883     | Chromosome     |
| 186                   | <i>Tetraodon nigroviridis</i>     | 342,403,326           | -            | 29,054     | Contig         |
| 187                   | <i>Cynoglossus semilaevis</i>     | 470,199,494           | 509,861      | 27,008     | Chromosome     |
| 188                   | <i>Haplochromis burtoni</i>       | 831,411,547           | 1,194,190    | 21,886     | Scaffold       |
| 189                   | <i>Pundamilia nyererei</i>        | 830,133,247           | 2,525,540    | 22,622     | Scaffold       |
| 190                   | <i>Maylandia zebra</i>            | 849,595,388           | 3,702,874    | 19,949     | Scaffold       |
| 191                   | <i>Neolamprologus brichardi</i>   | 847,910,432           | 4,430,025    | 13,047     | Scaffold       |
| 192                   | <i>Oreochromis niloticus</i>      | 927,696,114           | 2,766,223    | 29,493     | Chromosome     |
| 193                   | <i>Sebastes nigrocinctus</i>      | 687,549,873           | 12,083       | 8,171      | Scaffold       |
| 194                   | <i>Sebastes rubrivinctus</i>      | 756,296,653           | 30,046       | 13,541     | Scaffold       |
| 195                   | <i>Gasterosteus aculeatus</i>     | 446,610,788           | -            | 83,204     | Contig         |
| 196                   | <i>Gadus morhua</i>               | 824,311,139           | 393,166      | 2,311      | Scaffold       |
| <b>CHONDRICHTHYES</b> |                                   |                       |              |            |                |
| 197                   | <i>Callorhynchus milii</i>        | 974,498,586           | 4,521,921    | 46,577     | Scaffold       |
| 198                   | <i>Carcharhinus brachyurus</i>    | -                     | -            | -          | Contig?        |
| <b>ECDYSOZOA</b>      |                                   |                       |              |            |                |
| 199                   | <i>Ephemera danica</i>            | 475,911,277           | 527,117      | 12,200     | Scaffold       |
| 200                   | <i>Ladona fulva</i>               | 1,158,111,285         | 978,724      | 16,482     | Scaffold       |
| 201                   | <i>Pediculus humanus corporis</i> | 110,781,312           | 497,057      | 34,097     | Scaffold       |
| 202                   | <i>Frankliniella occidentalis</i> | 415,781,860           | 948,890      | 6,159      | Scaffold       |
| 203                   | <i>Diaphorina citri</i>           | 485,705,082           | 109,898      | 34,407     | Scaffold       |
| 204                   | <i>Pachypsylla venusta</i>        | 701,763,251           | 157,704      | 1,853      | Scaffold       |
| 205                   | <i>Acyrtosiphon pisum</i>         | 541,692,442           | 518,546      | 28,199     | Scaffold       |
| 206                   | <i>Nilaparvata lugens</i>         | 1,140,786,310         | 356,597      | 23,518     | Scaffold       |
| 207                   | <i>Oncopeltus fasciatus</i>       | 1,098,671,531         | 339,960      | 4,047      | Scaffold       |
| 208                   | <i>Rhodnius prolixus</i>          | 702,645,054           | 847,873      | 27,483     | Scaffold       |
| 209                   | <i>Cimex lectularius</i>          | 650,477,627           | 7,172,596    | 23,511     | Scaffold       |
| 210                   | <i>Onthophagus taurus</i>         | 270,533,845           | 251,443      | 15,427     | Scaffold       |
| 211                   | <i>Agrilus planipennis</i>        | 353,546,665           | 910,924      | 6,314      | Scaffold       |
| 212                   | <i>Tribolium castaneum</i>        | 210,264,614           | 975,455      | 43,511     | Chromosome     |
| 213                   | <i>Anoplophora glabripennis</i>   | 707,712,193           | 658,851      | 16,551     | Scaffold       |
| 214                   | <i>Leptinotarsa decemlineata</i>  | 1,170,241,964         | 414,170      | 4,913      | Scaffold       |
| 215                   | <i>Dendroctonus ponderosae</i>    | 252,847,629           | 628,732      | 7,451      | Scaffold       |
| 216                   | <i>Mengenilla moldrzyki</i>       | 155,727,465           | -            | 4,038      | Contig         |
| 217                   | <i>Aedes aegypti</i>              | 1,383,957,531         | 1,547,048    | 82,618     | Scaffold       |
| 218                   | <i>Culex quinquefasciatus</i>     | 579,042,118           | 486,756      | 28,546     | Scaffold       |

| No  | Species                                       | Total Sequence Length | Scaffold N50 | Contig N50 | Assembly Level |
|-----|-----------------------------------------------|-----------------------|--------------|------------|----------------|
| 219 | <i>Anopheles albimanus</i>                    | 170,508,315           | 18,068,499   | 200,121    | Scaffold       |
| 220 | <i>Anopheles arabiensis</i>                   | 246,567,867           | 5,604,218    | 74,117     | Scaffold       |
| 221 | <i>Anopheles atroparvus</i>                   | 224,290,125           | 9,206,694    | 53,613     | Scaffold       |
| 222 | <i>Anopheles christyi</i>                     | 172,658,580           | 9,057        | 8,461      | Scaffold       |
| 223 | <i>Anopheles culicifacies</i>                 | 202,998,806           | 22,320       | 13,414     | Scaffold       |
| 224 | <i>Anopheles darlingi</i>                     | 136,935,538           | -            | 115,072    | Contig         |
| 225 | <i>Anopheles dirus</i>                        | 216,307,690           | 6,906,475    | 76,300     | Scaffold       |
| 226 | <i>Anopheles epiroticus</i>                   | 223,486,714           | 366,526      | 88,996     | Scaffold       |
| 227 | <i>Anopheles farauti</i>                      | 183,103,254           | 12,895,223   | 161,110    | Scaffold       |
| 228 | <i>Anopheles funestus</i>                     | 225,223,604           | 671,960      | 60,888     | Scaffold       |
| 229 | <i>Anopheles gambiae</i>                      | 265,027,044           | 12,309,988   | 85,548     | Chromosome     |
| 230 | <i>Anopheles maculatus</i>                    | 141,894,015           | 3,841        | 2,984      | Scaffold       |
| 231 | <i>Anopheles melas</i>                        | 224,162,116           | 18,103       | 11,312     | Scaffold       |
| 232 | <i>Anopheles merus</i>                        | 288,048,996           | 1,489,982    | 48,115     | Scaffold       |
| 233 | <i>Anopheles minimus</i>                      | 201,793,324           | 10,313,149   | 123,292    | Scaffold       |
| 234 | <i>Anopheles quadriannulatus</i>              | 283,828,998           | 1,641,272    | 39,415     | Scaffold       |
| 235 | <i>Anopheles sinensis</i>                     | 220,777,669           | 814,231      | 30,137     | Scaffold       |
| 236 | <i>Anopheles stephensi</i>                    | 221,324,304           | 1,591,355    | 36,511     | Scaffold       |
| 237 | <i>Mayetiola destructor</i>                   | 185,827,756           | 756,041      | 14,032     | Scaffold       |
| 238 | <i>Lutzomyia longipalpis</i>                  | 154,229,266           | 85,093       | 7,481      | Scaffold       |
| 239 | <i>Phlebotomus papatasi</i>                   | 363,767,980           | 27,956       | 5,795      | Scaffold       |
| 240 | <i>Ceratitidis capitata</i>                   | 484,789,472           | 4,060,615    | 45,711     | Scaffold       |
| 241 | <i>Drosophila albomicans</i>                  | 253,560,284           | 23,589       | 3,826      | Scaffold       |
| 242 | <i>Drosophila ananassae</i>                   | 230,993,012           | 4,599,533    | 95,247     | Scaffold       |
| 243 | <i>Drosophila biarmipes</i>                   | 169,378,599           | 3,386,121    | 474,639    | Scaffold       |
| 244 | <i>Drosophila bipectinata</i>                 | 167,263,958           | 663,995      | 149,088    | Scaffold       |
| 245 | <i>Drosophila elegans</i>                     | 171,267,669           | 1,714,184    | 212,818    | Scaffold       |
| 246 | <i>Drosophila erecta</i>                      | 152,712,140           | 18,748,788   | 453,616    | Scaffold       |
| 247 | <i>Drosophila eugracilis</i>                  | 156,942,009           | 976,885      | 224,458    | Scaffold       |
| 248 | <i>Drosophila ficusphila</i>                  | 152,439,475           | 1,050,541    | 275,894    | Scaffold       |
| 249 | <i>Drosophila grimshawi</i>                   | 200,467,819           | 8,399,593    | 91,192     | Scaffold       |
| 250 | <i>Drosophila kikkawai</i>                    | 164,292,578           | 903,682      | 209,056    | Scaffold       |
| 251 | <i>Drosophila melanogaster</i>                | 143,726,002           | -            | 21,485,538 | Chromosome     |
| 252 | <i>Drosophila miranda</i>                     | 136,728,780           | -            | 77,651     | Chromosome     |
| 253 | <i>Drosophila mojavensis</i>                  | 193,826,310           | 24,764,193   | 121,517    | Scaffold       |
| 254 | <i>Drosophila persimilis</i>                  | 188,374,079           | 1,869,541    | 20,311     | Scaffold       |
| 255 | <i>Drosophila pseudoobscura pseudoobscura</i> | 152,696,384           | 12,541,198   | 202,541    | Chromosome     |
| 256 | <i>Drosophila rhopaloea</i>                   | 197,375,704           | 45,514       | 19,484     | Scaffold       |
| 257 | <i>Drosophila sechellia</i>                   | 166,592,095           | 2,123,299    | 42,955     | Scaffold       |
| 258 | <i>Drosophila simulans</i>                    | 137,843,219           | 857,818      | 15,131     | Chromosome     |
| 259 | <i>Drosophila suzukii</i>                     | 232,923,092           | 388,966      | 24,954     | Scaffold       |
| 260 | <i>Drosophila takahashii</i>                  | 182,106,768           | 387,676      | 126,259    | Scaffold       |
| 261 | <i>Drosophila virilis</i>                     | 206,026,697           | 10,161,210   | 120,091    | Scaffold       |
| 262 | <i>Drosophila willistoni</i>                  | 235,516,348           | 4,511,350    | 180,217    | Scaffold       |
| 263 | <i>Drosophila yakuba</i>                      | 165,709,965           | 21,770,863   | 115,562    | Chromosome     |
| 264 | <i>Musca domestica</i>                        | 750,403,944           | 226,573      | 11,807     | Scaffold       |
| 265 | <i>Glossina austeni</i>                       | 370,264,922           | 812,585      | 45,924     | Scaffold       |
| 266 | <i>Glossina brevipalpis</i>                   | 315,360,362           | 1,209,507    | 62,009     | Scaffold       |

| No  | Species                               | Total Sequence Length | Scaffold N50 | Contig N50 | Assembly Level |
|-----|---------------------------------------|-----------------------|--------------|------------|----------------|
| 267 | <i>Glossina fuscipes fuscipes</i>     | 374,774,708           | 561,190      | 64,354     | Scaffold       |
| 268 | <i>Glossina morsitans morsitans</i>   | 363,107,242           | -            | 49,769     | Contig         |
| 269 | <i>Glossina pallidipes</i>            | 357,332,231           | 1,038,751    | 167,200    | Scaffold       |
| 270 | <i>Limnephilus lunatus</i>            | 1,345,859,447         | 54,650       | 2,103      | Scaffold       |
| 271 | <i>Papilio glaucus</i>                | 374,815,656           | -            | 12,225     | Scaffold       |
| 272 | <i>Papilio polytes</i>                | 227,021,014           | 3,672,263    | 47,768     | Scaffold       |
| 273 | <i>Papilio xuthus</i>                 | 243,890,167           | 6,198,915    | 128,246    | Scaffold       |
| 274 | <i>Heliconius melpomene melpomene</i> | 273,786,188           | 194,302      | 51,027     | Scaffold       |
| 275 | <i>Melitaea cinxia</i>                | 389,907,520           | 119,328      | 13,489     | Scaffold       |
| 276 | <i>Danaus plexippus</i>               | 272,853,388           | 52,968       | 50,721     | Scaffold       |
| 277 | <i>Bombyx mori</i>                    | 481,819,406           | 4,008,358    | 15,510     | Scaffold       |
| 278 | <i>Manduca sexta</i>                  | 419,424,057           | 664,006      | 40,396     | Scaffold       |
| 279 | <i>Plutella xylostella</i>            | 393,470,562           | 737,182      | 18,517     | Scaffold       |
| 280 | <i>Athalia rosae</i>                  | 163,837,890           | 1,366,867    | 51,418     | Scaffold       |
| 281 | <i>Cephus cinctus</i>                 | 162,226,239           | 622,163      | 44,905     | Scaffold       |
| 282 | <i>Orussus abietinus</i>              | 201,220,334           | 2,372,050    | 54,038     | Scaffold       |
| 283 | <i>Ceratosolen solmsi marchali</i>    | 277,059,195           | 9,558,897    | 74,702     | Scaffold       |
| 284 | <i>Nasonia giraulti</i>               | 283,606,953           | 759,431      | 1,971      | Scaffold       |
| 285 | <i>Nasonia longicornis</i>            | 285,726,340           | 758,407      | 1,876      | Scaffold       |
| 286 | <i>Nasonia vitripennis</i>            | 295,780,872           | 708,988      | 18,840     | Chromosome     |
| 287 | <i>Copidosoma floridanum</i>          | 555,044,930           | 1,037,125    | 14,521     | Scaffold       |
| 288 | <i>Trichogramma pretiosum</i>         | 195,087,592           | 3,706,225    | 78,655     | Scaffold       |
| 289 | <i>Microplitis demolitor</i>          | 250,525,215           | 318,766      | 13,540     | Scaffold       |
| 290 | <i>Megachile rotundata</i>            | 272,660,569           | 1,699,680    | 64,153     | Scaffold       |
| 291 | <i>Apis dorsata</i>                   | 230,340,171           | 732,052      | 8,422      | Scaffold       |
| 292 | <i>Apis florea</i>                    | 230,467,781           | 2,863,240    | 24,704     | Scaffold       |
| 293 | <i>Apis mellifera</i>                 | 250,287,000           | 997,192      | 45,688     | Chromosome     |
| 294 | <i>Bombus impatiens</i>               | 249,185,056           | 1,399,493    | 58,885     | Scaffold       |
| 295 | <i>Bombus terrestris</i>              | 248,654,244           | 3,506,793    | 76,043     | Chromosome     |
| 296 | <i>Linepithema humile</i>             | 219,500,750           | 1,402,257    | 35,858     | Scaffold       |
| 297 | <i>Camponotus floridanus</i>          | 232,685,334           | 451,320      | 19,487     | Scaffold       |
| 298 | <i>Acromyrmex echinator</i>           | 295,944,863           | 1,110,580    | 80,630     | Scaffold       |
| 299 | <i>Atta cephalotes</i>                | 317,671,980           | 5,154,485    | 14,798     | Scaffold       |
| 300 | <i>Solenopsis invicta</i>             | 396,024,718           | 558,018      | 14,677     | Scaffold       |
| 301 | <i>Pogonomyrmex barbatus</i>          | 235,645,958           | 819,605      | 11,605     | Scaffold       |
| 302 | <i>Harpegnathos saltator</i>          | 294,465,601           | 601,965      | 38,321     | Scaffold       |
| 303 | <i>Cerapachys biroi</i>               | 212,825,769           | 1,350,650    | 34,211     | Scaffold       |
| 304 | <i>Blattella germanica</i>            | 2,037,201,033         | 1,056,071    | 12,125     | Scaffold       |
| 305 | <i>Zootermopsis nevadensis</i>        | 485,009,472           | 751,105      | 22,794     | Scaffold       |
| 306 | <i>Daphnia pulex</i>                  | 197,206,209           | 642,089      | 49,250     | Scaffold       |
| 307 | <i>Eurytemora affinis</i>             | 494,890,867           | 862,645      | 5,738      | Scaffold       |
| 308 | <i>Hyalella azteca</i>                | 1,178,848,281         | 987,977      | 5,445      | Scaffold       |
| 309 | <i>Strigamia maritima</i>             | 176,210,797           | 139,451      | 24,745     | Scaffold       |
| 310 | <i>Stegodyphus mimosarum</i>          | 2,738,704,917         | 480,636      | 40,146     | Scaffold       |
| 311 | <i>Latrodectus hesperus</i>           | 1,137,104,656         | 13,889       | 2,223      | Scaffold       |
| 312 | <i>Parasteatoda tepidariorum</i>      | 1,443,909,906         | 465,572      | 10,149     | Scaffold       |
| 313 | <i>Tetranychus urticae</i>            | 90,815,494            | 2,993,488    | 212,780    | Scaffold       |



| No                     | Species                               | Total Sequence Length | Scaffold N50 | Contig N50 | Assembly Level |
|------------------------|---------------------------------------|-----------------------|--------------|------------|----------------|
| 314                    | <i>Dermatophagoides farinae</i>       | 53,545,338            | 186,342      | 8,538      | Scaffold       |
| 315                    | <i>Sarcoptes scabiei type canis</i>   | 56,262,437            | -            | 11,197     | Scaffold       |
| 316                    | <i>Achipteria coleoptrata</i>         | 88,443,889            | -            | 3,360      | Scaffold       |
| 317                    | <i>Hypochthonius rufulus</i>          | 172,365,132           | -            | 3,126      | Scaffold       |
| 318                    | <i>Platynothrus peltifer</i>          | 100,532,934           | -            | 1,236      | Scaffold       |
| 319                    | <i>Steganacarus magnus</i>            | 113,565,242           | -            | 1,617      | Scaffold       |
| 320                    | <i>Ixodes ricinus</i>                 | 391,986,416           | -            | 1,638      | Scaffold       |
| 321                    | <i>Ixodes scapularis</i>              | 1,765,382,190         | 76,228       | 2,942      | Scaffold       |
| 322                    | <i>Rhipicephalus microplus</i>        | 144,692,238           | -            | 827        | Contig         |
| 323                    | <i>Metaseiulus occidentalis</i>       | 151,724,311           | 896,831      | 200,706    | Scaffold       |
| 324                    | <i>Varroa destructor</i>              | 294,133,941           | -            | 2,262      | Contig         |
| 325                    | <i>Centruroides exilicauda</i>        | 926,399,729           | 342,549      | 5,173      | Scaffold       |
| 326                    | <i>Mesobuthus martensii</i>           | 925,546,267           | -            | 45,228     | Contig         |
| 327                    | <i>Limulus polyphemus</i>             | 1,828,271,751         | 254,089      | 11,441     | Scaffold       |
| 328                    | <i>Trichinella spiralis</i>           | 63,525,422            | 6,373,445    | 76,707     | Scaffold       |
| 329                    | <i>Ascaris suum</i>                   | 269,559,681           | 413,062      | 22,226     | Scaffold       |
| 330                    | <i>Elaeophora elaphi</i>              | 1,480,825             | 1,480,825    | 99,433     | Scaffold       |
| 331                    | <i>Onchocerca volvulus</i>            | 96,427,779            | 25,485,961   | 577,378    | Scaffold       |
| 332                    | <i>Steinernema monticolum</i>         | 89,158,954            | 11,563       | 2,456      | Scaffold       |
| 333                    | <i>Panagrellus redivivus</i>          | 65,093,147            | 262,414      | 19,707     | Scaffold       |
| 334                    | <i>Haemonchus contortus</i>           | 319,757,902           | 99,131       | 23,747     | Scaffold       |
| 335                    | <i>Necator americanus</i>             | 244,075,060           | 211,861      | 5,429      | Scaffold       |
| 336                    | <i>Heterorhabditis bacteriophora</i>  | 76,974,349            | 312,328      | 101,980    | Scaffold       |
| 337                    | <i>Caenorhabditis angaria</i>         | 79,761,545            | 9,453        | 1,196      | Scaffold       |
| 338                    | <i>Caenorhabditis brenneri</i>        | 190,369,721           | 381,961      | 31,887     | Scaffold       |
| 339                    | <i>Caenorhabditis briggsae</i>        | 108,478,526           | 14,512,975   | 45,155     | Chromosome     |
| 340                    | <i>Caenorhabditis elegans</i>         | 100,286,401           | -            | 17,493,829 | Chromosome     |
| 341                    | <i>Caenorhabditis japonica</i>        | 166,256,191           | 94,149       | 10,166     | Scaffold       |
| 342                    | <i>Caenorhabditis sp. 11 MAF-2010</i> | 79,321,433            | 20,921,866   | 22,519     | Scaffold       |
| 343                    | <i>Priapulus caudatus</i>             | 420,178,403           | 126,878      | 4,487      | Scaffold       |
| <b>ROTIFERA</b>        |                                       |                       |              |            |                |
| 344                    | <i>Adineta vaga</i>                   | 217,933,776           | 260,259      | 94,665     | Scaffold       |
| <b>PLATYHELMINTHES</b> |                                       |                       |              |            |                |
| 345                    | <i>Schistosoma curassoni</i>          | 344,202,215           | -            | 7,099      | Scaffold       |
| 346                    | <i>Schistosoma haematobium</i>        | 375,894,156           | 317,484      | 22,446     | Scaffold       |
| 347                    | <i>Schistosoma japonicum</i>          | 402,743,189           | 176,869      | 6,121      | Scaffold       |
| 348                    | <i>Schistosoma mansoni</i>            | 364,538,298           | -            | 76,721     | Chromosome     |
| 349                    | <i>Schistosoma margrebowiei</i>       | 367,396,528           | -            | 28,534     | Scaffold       |
| 350                    | <i>Schistosoma mattheei</i>           | 340,818,150           | -            | 4,667      | Scaffold       |
| 351                    | <i>Schistosoma rodhaini</i>           | 343,294,136           | -            | 2,714      | Scaffold       |
| 352                    | <i>Clonorchis sinensis</i>            | 547,288,241           | 417,486      | 233,037    | Scaffold       |
| 353                    | <i>Echinococcus granulosus</i>        | 112,350,571           | 6,536,549    | 219,470    | Scaffold       |
| 354                    | <i>Echinococcus multilocularis</i>    | 7,371,474             | 277,614      | 275,497    | Scaffold       |
| 355                    | <i>Hymenolepis microstoma</i>         | 126,773,784           | 651,751      | 78,513     | Scaffold       |
| <b>ANNELIDA</b>        |                                       |                       |              |            |                |
| 356                    | <i>Capitella teleta</i>               | 333,283,208           | 188,402      | 21,930     | Scaffold       |

| No                   | Species                                           | Total Sequence Length | Scaffold N50 | Contig N50 | Assembly Level  |
|----------------------|---------------------------------------------------|-----------------------|--------------|------------|-----------------|
| 357                  | <i>Helobdella robusta</i>                         | 235,376,169           | 3,060,193    | 52,195     | Scaffold        |
| <b>MOLLUSCA</b>      |                                                   |                       |              |            |                 |
| 358                  | <i>Crassostrea gigas</i>                          | 557,735,934           | 401,685      | 31,239     | Scaffold        |
| 359                  | <i>Lottia gigantea</i>                            | 359,505,668           | 1,870,055    | 96,027     | Scaffold        |
| 360                  | <i>Aplysia californica</i>                        | 927,310,431           | 917,541      | 9,586      | Scaffold        |
| 361                  | <i>Biomphalaria glabrata</i>                      | 916,388,084           | 48,059       | 7,298      | Scaffold        |
| <b>CNIDARIA</b>      |                                                   |                       |              |            |                 |
| 362                  | <i>Nematostella vectensis</i>                     | 356,613,585           | 472,588      | 19,835     | Scaffold        |
| 363                  | <i>Hydra vulgaris</i>                             | 852,170,992           | 96,317       | 10,112     | Scaffold        |
| <b>TENTACULATA</b>   |                                                   |                       |              |            |                 |
| 364                  | <i>Mnemiopsis leidyi</i>                          | 155,865,547           | 187,314      | 11,936     | Scaffold        |
| <b>PLACOZOA</b>      |                                                   |                       |              |            |                 |
| 365                  | <i>Trichoplax adhaerens</i>                       | 105,631,681           | 5,978,658    | 204,191    | Scaffold        |
| <b>PORIFERA</b>      |                                                   |                       |              |            |                 |
| 366                  | <i>Amphimedon queenslandica</i>                   | 166,699,561           | 120,365      | 11,817     | Scaffold        |
| <b>VIRIDIPLANTAE</b> |                                                   |                       |              |            |                 |
| 367                  | <i>Micromonas pusilla</i><br><i>CCMP1545</i>      | 22,000,071            | 1,183,541    | 83,658     | Scaffold        |
| 368                  | <i>Micromonas sp. RCC299</i>                      | 21,109,336            | -            | -          | Complete Genome |
| 369                  | <i>Ostreococcus lucimarinus</i><br><i>CCE9901</i> | 13,204,888            | -            | -          | Complete Genome |
| 370                  | <i>Ostreococcus tauri</i>                         | 12,572,254            | -            | 15,097     | Chromosome      |
| 371                  | <i>Chlamydomonas reinhardtii</i>                  | 120,404,952           | 1,695,175    | 44,607     | Scaffold        |
| 372                  | <i>Volvox carteri f. nagariensis</i>              | 137,684,403           | 1,491,501    | 43,981     | Scaffold        |
| 373                  | <i>Chlorella variabilis</i>                       | 46,159,512            | 1,469,606    | 27,941     | Scaffold        |
| 374                  | <i>Auxenochlorella protothecoides</i>             | 22,924,637            | 285,543      | 35,091     | Scaffold        |
| 375                  | <i>Helicosporidium sp.</i><br><i>ATCC 50920</i>   | 12,373,820            | -            | 3,036      | Contig          |
| 376                  | <i>Coccomyxa subellipsoidea</i><br><i>C-169</i>   | 48,826,616            | -            | 1,959,569  | Contig          |
| 377                  | <i>Klebsormidium flaccidum</i>                    | 104,209,716           | 134,930      | 72,848     | Scaffold        |
| 378                  | <i>Physcomitrella patens</i>                      | 477,947,608           | 1,331,933    | 74,043     | Scaffold        |
| 379                  | <i>Selaginella moellendorffii</i>                 | 212,501,708           | 1,749,879    | 119,796    | Scaffold        |
| 380                  | <i>Pinus taeda</i>                                | 265,480,119           | -            | 16,205     | Contig          |
| 381                  | <i>Amborella trichopoda</i>                       | 706,332,640           | 4,927,027    | 29,332     | Scaffold        |
| 382                  | <i>Spirodela polyrhiza</i>                        | 132,009,443           | -            | 14,533     | Contig          |
| 383                  | <i>Phoenix dactylifera</i>                        | 556,480,649           | 335,289      | 10,936     | Scaffold        |
| 384                  | <i>Elaeis oleifera</i>                            | 1,402,725,009         | 333,109      | 8,445      | Scaffold        |
| 385                  | <i>Ensete ventricosum</i>                         | 172,241,963           | 13,657       | 8,724      | Scaffold        |
| 386                  | <i>Musa acuminata subsp. malaccensis</i>          | 472,235,617           | 1,311,088    | 28,326     | Chromosome      |
| 387                  | <i>Sorghum bicolor</i>                            | 739,150,314           | 33,610,934   | 195,424    | Chromosome      |
| 388                  | <i>Zea mays</i>                                   | 2,067,622,303         | 217,928,451  | 41,305     | Chromosome      |
| 389                  | <i>Setaria italica</i>                            | 405,737,341           | 47,253,416   | 126,273    | Scaffold        |
| 390                  | <i>Brachypodium distachyon</i>                    | 272,058,505           | 59,328,898   | 347,842    | Chromosome      |

| No  | Species                                       | Total Sequence Length | Scaffold N50 | Contig N50 | Assembly Level |
|-----|-----------------------------------------------|-----------------------|--------------|------------|----------------|
| 391 | <i>Leersia perrieri</i>                       | 266,687,832           | -            | 50,248     | Chromosome     |
| 392 | <i>Oryza barthii</i>                          | 308,272,304           | -            | 18,926     | Chromosome     |
| 393 | <i>Oryza brachyantha</i>                      | 259,907,595           | 21,479,432   | 20,448     | Chromosome     |
| 394 | <i>Oryza glumipatula</i>                      | 372,860,283           | -            | 31,921     | Chromosome     |
| 395 | <i>Oryza longistaminata</i>                   | 326,442,508           | 93,178       | 4,894      | Scaffold       |
| 396 | <i>Oryza meridionalis</i>                     | 335,668,232           | -            | 9,149      | Chromosome     |
| 397 | <i>Oryza nivara</i>                           | 337,950,324           | -            | 37,688     | Chromosome     |
| 398 | <i>Oryza punctata</i>                         | 393,816,603           | -            | 43,035     | Chromosome     |
| 399 | <i>Oryza sativa Japonica Group</i>            | 382,778,125           | -            | 7,131,322  | Chromosome     |
| 400 | <i>Zizania latifolia</i>                      | 603,989,347           | 604,864      | 13,068     | Scaffold       |
| 401 | <i>Aegilops tauschii</i>                      | 3,313,650,219         | 68,369       | 6,204      | Scaffold       |
| 402 | <i>Triticum urartu</i>                        | 3,747,047,519         | 85,725       | 5,782      | Scaffold       |
| 403 | <i>Nelumbo nucifera</i>                       | 804,647,751           | 3,435,397    | 38,888     | Scaffold       |
| 404 | <i>Lupinus angustifolius</i>                  | 523,297,923           | 15,485       | 6,485      | Scaffold       |
| 405 | <i>Phaseolus vulgaris</i>                     | 521,076,696           | 50,367,376   | 39,053     | Chromosome     |
| 406 | <i>Cajanus cajan</i>                          | 510,809,477           | -            | 4,525      | Contig         |
| 407 | <i>Vigna angularis var. angularis</i>         | 291,823,841           | 21,697       | 13,270     | Scaffold       |
| 408 | <i>Vigna radiata var. radiata</i>             | 463,085,359           | -            | 48,831     | Scaffold       |
| 409 | <i>Glycine max</i>                            | 973,779,290           | 47,781,076   | 189,608    | Chromosome     |
| 410 | <i>Glycine soja</i>                           | 863,568,428           | 404,776      | 24,258     | Scaffold       |
| 411 | <i>Cicer arietinum</i>                        | 530,893,862           | 697,963      | 34,102     | Chromosome     |
| 412 | <i>Medicago truncatula</i>                    | 314,477,977           | 1,268,006    | 377,846    | Chromosome     |
| 413 | <i>Trifolium pratense</i>                     | 304,979,311           | -            | 2,431      | Contig         |
| 414 | <i>Lotus japonicus</i>                        | 147,812,252           | -            | 1,327      | Contig         |
| 415 | <i>Malus x domestica</i>                      | 1,874,765,253         | 1,893,947    | 12,414     | Chromosome     |
| 416 | <i>Pyrus x bretschneideri</i>                 | 508,550,595           | 535,028      | 33,767     | Scaffold       |
| 417 | <i>Prunus mume</i>                            | 234,030,239           | 636,887      | 32,274     | Chromosome     |
| 418 | <i>Prunus persica</i>                         | 227,251,827           | 26,807,724   | 213,042    | Scaffold       |
| 419 | <i>Fragaria iinumae</i>                       | 199,627,509           | 3,309        | 3,302      | Scaffold       |
| 420 | <i>Fragaria nubicola</i>                      | 203,686,407           | 1,291        | 1,288      | Scaffold       |
| 421 | <i>Fragaria orientalis</i>                    | 214,184,023           | 722          | 721        | Scaffold       |
| 422 | <i>Fragaria vesca subsp. vesca</i>            | 214,373,013           | 27,879,571   | 28,051     | Chromosome     |
| 423 | <i>Fragaria x ananassa</i>                    | 173,229,572           | 5,137        | 2,235      | Scaffold       |
| 424 | <i>Morus notabilis</i>                        | 320,378,613           | 405,448      | 40,438     | Scaffold       |
| 425 | <i>Cannabis sativa</i>                        | 757,438,891           | 16,337       | 2,893      | Scaffold       |
| 426 | <i>Castanea mollissima</i>                    | 833,240,550           | 32,186       | 17,495     | Scaffold       |
| 427 | <i>Betula nana</i>                            | 564,011,153           | -            | 4,884      | Contig         |
| 428 | <i>Cucumis melo</i>                           | 374,928,489           | 4,278,129    | 18,084     | Scaffold       |
| 429 | <i>Cucumis sativus</i>                        | 244,817,324           | 1,146,197    | 20,182     | Scaffold       |
| 430 | <i>Citrullus lanatus</i>                      | 321,046,825           | -            | 26,400     | Contig         |
| 431 | <i>Lagenaria siceraria</i>                    | 176,727,258           | 782          | 537        | Scaffold       |
| 432 | <i>Populus euphratica</i>                     | 496,032,534           | 482,055      | 40,490     | Scaffold       |
| 433 | <i>Populus trichocarpa</i>                    | 417,286,671           | 18,835,763   | 242,226    | Chromosome     |
| 434 | <i>Jatropha curcas</i>                        | 318,527,106           | 746,835      | 27,229     | Scaffold       |
| 435 | <i>Manihot esculenta subsp. flabellifolia</i> | 390,835,892           | 14,635       | 7,381      | Scaffold       |
| 436 | <i>Ricinus communis</i>                       | 350,621,860           | 496,528      | 21,409     | Scaffold       |

| No  | Species                                          | Total Sequence Length | Scaffold N50 | Contig N50 | Assembly Level |
|-----|--------------------------------------------------|-----------------------|--------------|------------|----------------|
| 437 | <i>Linum usitatissimum</i>                       | 282,201,865           | -            | 21,193     | Contig         |
| 438 | <i>Eucalyptus camaldulensis</i>                  | 478,318,461           | -            | 5,922      | Scaffold       |
| 439 | <i>Eucalyptus grandis</i>                        | 691,429,809           | 53,892,272   | 67,273     | Scaffold       |
| 440 | <i>Carica papaya</i>                             | 369,781,828           | 1,089,885    | 10,609     | Scaffold       |
| 441 | <i>Arabidopsis halleri subsp. gemmifera</i>      | 221,139,660           | -            | 2,864      | Scaffold       |
| 442 | <i>Arabidopsis lyrata subsp. lyrata</i>          | 206,667,935           | 24,464,547   | 227,391    | Scaffold       |
| 443 | <i>Arabidopsis thaliana</i>                      | 119,667,750           | -            | 11,194,537 | Chromosome     |
| 444 | <i>Camelina sativa</i>                           | 641,356,059           | -            | 32,728     | Chromosome     |
| 445 | <i>Capsella rubella</i>                          | 133,063,876           | 15,040,190   | 134,357    | Scaffold       |
| 446 | <i>Brassica napus</i>                            | 930,507,853           | 41,855,496   | 39,845     | Chromosome     |
| 447 | <i>Brassica oleracea var. oleracea</i>           | 488,954,160           | -            | 21,938     | Chromosome     |
| 448 | <i>Brassica rapa</i>                             | 284,129,391           | 1,960,303    | 46,175     | Chromosome     |
| 449 | <i>Raphanus raphanistrum subsp. raphanistrum</i> | 253,833,977           | -            | 10,186     | Contig         |
| 450 | <i>Raphanus sativus</i>                          | 341,476,849           | -            | 24,475     | Contig         |
| 451 | <i>Aethionema arabicum</i>                       | 192,487,774           | 123,806      | 10,972     | Scaffold       |
| 452 | <i>Arabis alpina</i>                             | 308,032,609           | 13,663,266   | 9,916      | Chromosome     |
| 453 | <i>Eutrema parvulum</i>                          | 137,073,209           | 9,613,411    | 5,288,824  | Chromosome     |
| 454 | <i>Eutrema salsugineum</i>                       | 243,110,105           | 13,441,892   | 222,588    | Scaffold       |
| 455 | <i>Sisymbrium irio</i>                           | 245,550,082           | 144,321      | 11,849     | Scaffold       |
| 456 | <i>Leavenworthia alabamica</i>                   | 173,431,618           | 71,084       | 15,066     | Scaffold       |
| 457 | <i>Tarenaya hassleriana</i>                      | 249,929,577           | 1,600,628    | 22,358     | Scaffold       |
| 458 | <i>Gossypium arboreum</i>                        | 1,560,831,891         | -            | 71,965     | Contig         |
| 459 | <i>Gossypium raimondii</i>                       | 761,565,430           | 62,175,169   | 119,844    | Chromosome     |
| 460 | <i>Theobroma cacao</i>                           | 345,993,675           | 4,345,749    | 84,396     | Chromosome     |
| 461 | <i>Aquilaria agallochum</i>                      | 726,710,453           | 128,399      | 16,831     | Scaffold       |
| 462 | <i>Azadirachta indica</i>                        | 261,457,759           | -            | 3,491      | Contig         |
| 463 | <i>Citrus clementine</i>                         | 301,364,702           | 31,410,901   | 109,915    | Scaffold       |
| 464 | <i>Citrus sinensis</i>                           | 327,829,540           | 1,778,813    | 49,898     | Chromosome     |
| 465 | <i>Vitis vinifera</i>                            | 486,196,837           | 3,426,264    | 102,851    | Chromosome     |
| 466 | <i>Amaranthus hypochondriacus</i>                | 502,147,592           | 42,518       | 644        | Scaffold       |
| 467 | <i>Amaranthus tuberculatus</i>                   | 4,347,977             | -            | 241        | Contig         |
| 468 | <i>Beta vulgaris subsp. vulgaris</i>             | 566,567,364           | 2,013,180    | 26,532     | Chromosome     |
| 469 | <i>Spinacia oleracea</i>                         | 474,077,292           | 20,184       | 6,184      | Scaffold       |
| 470 | <i>Dianthus caryophyllus</i>                     | 567,661,845           | 60,730       | 16,727     | Scaffold       |
| 471 | <i>Actinidia chinensis</i>                       | 604,217,145           | -            | 58,864     | Contig         |
| 472 | <i>Vaccinium macrocarpon</i>                     | 414,621,889           | -            | 4,278      | Scaffold       |
| 473 | <i>Diospyros lotus</i>                           | 1,104,189             | -            | 1,864      | Contig         |
| 474 | <i>Primula veris</i>                             | 309,692,940           | -            | 13,157     | Scaffold       |
| 475 | <i>Solanum arcanum</i>                           | 665,186,956           | -            | 31,288     | Contig         |
| 476 | <i>Solanum habrochaites</i>                      | 724,284,658           | -            | 37,085     | Contig         |
| 477 | <i>Solanum lycopersicum</i>                      | 781,508,772           | 16,467,796   | 86,952     | Chromosome     |
| 478 | <i>Solanum melongena</i>                         | 833,080,760           | 64,530       | 15,025     | Scaffold       |
| 479 | <i>Solanum pennellii</i>                         | 720,458,090           | -            | 28,135     | Contig         |
| 480 | <i>Solanum pimpinellifolium</i>                  | 688,247,059           | -            | 5,714      | Contig         |

| No                        | Species                              | Total Sequence Length | Scaffold N50 | Contig N50 | Assembly Level |
|---------------------------|--------------------------------------|-----------------------|--------------|------------|----------------|
| 481                       | <i>Solanum tuberosum</i>             | 705,934,411           | 1,344,915    | 31,933     | Scaffold       |
| 482                       | <i>Capsicum annuum</i>               | 3,063,642,317         | 2,472,394    | 29,995     | Scaffold       |
| 483                       | <i>Nicotiana glauca</i>              | 2,221,987,173         | 79,727       | 26,746     | Scaffold       |
| 484                       | <i>Nicotiana tomentosiformis</i>     | 1,688,468,039         | 82,598       | 34,053     | Scaffold       |
| 485                       | <i>Fraxinus excelsior</i>            | 875,243,685           | 98,766       | 22,012     | Scaffold       |
| 486                       | <i>Penstemon centranthifolius</i>    | 4,471,593             | -            | 752        | Contig         |
| 487                       | <i>Penstemon grinnellii</i>          | 3,663,524             | -            | 780        | Contig         |
| 488                       | <i>Sesamum indicum</i>               | 275,059,498           | 2,060,396    | 52,214     | Chromosome     |
| 489                       | <i>Genlisea aurea</i>                | 43,357,795            | 5,786        | 5,761      | Contig         |
| 490                       | <i>Mimulus guttatus</i>              | 322,166,964           | 1,123,783    | 45,503     | Scaffold       |
| 491                       | <i>Conyza canadensis</i>             | 326,165,195           | -            | 20,748     | Contig         |
| <b>ECHINOIDEA</b>         |                                      |                       |              |            |                |
| 492                       | <i>Lytechinus variegatus</i>         | 951,759,914           | 42,623       | 6,207      | Scaffold       |
| 493                       | <i>Strongylocentrotus purpuratus</i> | 936,580,645           | 402,043      | 13,455     | Scaffold       |
| <b>ASTEROIDEA</b>         |                                      |                       |              |            |                |
| 494                       | <i>Patiria miniata</i>               | 811,028,858           | 52,614       | 9,466      | Scaffold       |
| <b>ENTEROPNEUSTA</b>      |                                      |                       |              |            |                |
| 495                       | <i>Saccoglossus kowalevskii</i>      | 775,840,395           | 245,820      | 10,074     | Scaffold       |
| <b>TUNICATA</b>           |                                      |                       |              |            |                |
| 496                       | <i>Ciona intestinalis</i>            | 115,227,500           | 3,102,162    | 37,096     | Chromosome     |
| 497                       | <i>Ciona savignyi</i>                | 587,352,817           | 601,536      | 22,563     | Scaffold       |
| 498                       | <i>Botryllus schlosseri</i>          | 579,633,380           | 7,220        | 6,924      | Scaffold       |
| 499                       | <i>Oikopleura dioica</i>             | 70,471,451            | 395,387      | 24,932     | Scaffold       |
| <b>LEPTOCARDII</b>        |                                      |                       |              |            |                |
| 500                       | <i>Branchiostoma floridae</i>        | 521,895,125           | 2,586,727    | 27,925     | Scaffold       |
| <b>CEPHALASPIDOMORPHI</b> |                                      |                       |              |            |                |
| 501                       | <i>Lethenteron camtschaticum</i>     | 1,030,662,718         | 1,051,965    | 9,240      | Scaffold       |
| 502                       | <i>Petromyzon marinus</i>            | 885,534,757           | 184,619      | 13,108     | Scaffold       |
| <b>SARCOPTERYGII</b>      |                                      |                       |              |            |                |
| 503                       | <i>Latimeria chalumnae</i>           | 2,860,591,921         | 924,513      | 12,671     | Scaffold       |

Table 3: **Assembly method and coverage:** Shows the systematic name, assembly method, sequencing technology and estimated genome coverage for the 503 genomes used in this study. Species are listed in the same order as Table 1. For most genomes, this information can be found on NCBI ([www.ncbi.nlm.nih.gov/](http://www.ncbi.nlm.nih.gov/) → Assembly → look up the genome of interest → WGS Project file). However, the information is incomplete in some genomes because the NCBI Assembly database only contains the information provided by the submitters.

| No              | Species                               | Assembly Method                                     | Sequencing Technology                         | Genome Coverage |
|-----------------|---------------------------------------|-----------------------------------------------------|-----------------------------------------------|-----------------|
| <b>MAMMALIA</b> |                                       |                                                     |                                               |                 |
| 1               | <i>Tachyglossus aculeatus</i>         | -                                                   | -                                             | -               |
| 2               | <i>Ornithorhynchus anatinus</i>       | PCAP                                                | WGS plasmid, fosmid end and BAC end sequences | 6x              |
| 3               | <i>Monodelphis domestica</i>          | ARACHNE2+                                           | Sanger                                        | 6.8x            |
| 4               | <i>Macropus eugenii</i>               | ?                                                   | ABI 3730; Sanger; SOLiD                       | 2x              |
| 5               | <i>Sarcophilus harrisii</i>           | Phusion2 v. 1.0                                     | Illumina HiSeq2000                            | 85x             |
| 6               | <i>Dasypus novemcinctus</i>           | Celera Assembler v. 6.0; Atlas-Link; Atlas-Gap-Fill | Sanger                                        | 6x              |
| 7               | <i>Choloepus hoffmanni</i>            | ?                                                   | ?                                             | 2.18x           |
| 8               | <i>Chrysochloris asiatica</i>         | Allpaths v. R42316<br>HAPLOIDIFY=True               | Illumina HiSeq                                | 66x             |
| 9               | <i>Echinops telfairi</i>              | Allpaths v. R37599                                  | Illumina HiSeq                                | 78x             |
| 10              | <i>Orycteropus afer afer</i>          | Allpaths v. R40776 LIT-TLE_HELPES_BIG=False         | Illumina HiSeq                                | 44x             |
| 11              | <i>Elephantulus edwardii</i>          | Allpaths v. R42301<br>HAPLOIDIFY=True               | Illumina HiSeq                                | 62x             |
| 12              | <i>Trichechus manatus latirostris</i> | AllPaths v. R38542                                  | Illumina HiSeq                                | 150x            |
| 13              | <i>Procavia capensis</i>              | Arachne v. before 2009                              | Sanger                                        | 2.41x           |
| 14              | <i>Loxodonta africana</i>             | -                                                   | -                                             | -               |
| 15              | <i>Erinaceus europaeus</i>            | Allpaths v. R41008                                  | Illumina Hi-Seq                               | 79x             |
| 16              | <i>Sorex araneus</i>                  | Allpaths v. R41070                                  | Illumina Hi-Seq                               | 120x            |
| 17              | <i>Condylura cristata</i>             | AllPaths v. 2012                                    | Illumina HiSeq                                | 113.1x          |
| 18              | <i>Pteropus alecto</i>                | SOAPdenovo v. 1.06                                  | Illumina HighSeq 2000                         | 110x            |
| 19              | <i>Pteropus vampyrus</i>              | ?                                                   | ?                                             | 2.89x           |
| 20              | <i>Eidolon helvum</i>                 | CLC NGS Cell v. 3.20.50819; SOAPdenovo v. 1.05      | Illumina HiSeq                                | 18.0x           |
| 21              | <i>Megaderma lyra</i>                 | CLC NGS Cell v. 3.20.50819; SOAPdenovo v. 1.05      | Illumina HiSeq                                | 18.0x           |
| 22              | <i>Rhinolophus ferrumequinum</i>      | CLC NGS Cell v. 3.20.50819; SOAPdenovo v. 1.05      | Illumina HiSeq                                | 17.0x           |
| 23              | <i>Pteronotus parnellii</i>           | CLC NGS Cell v. 3.20.50819; SOAPdenovo v. 1.05      | Illumina HiSeq                                | 17.0x           |
| 24              | <i>Eptesicus fuscus</i>               | ALLPATHS v. R40371                                  | Illumina Hi-Seq                               | 84x             |
| 25              | <i>Myotis brandtii</i>                | SOAP de novo v. 2.04                                | Illumina HiSeq 2000                           | 120x            |
| 26              | <i>Myotis davidii</i>                 | SOAPdenovo v. 1.06                                  | Illumina HighSeq 2000                         | 110x            |
| 27              | <i>Myotis lucifugus</i>               | Arachne v. Dev. Jan 2010                            | Sanger                                        | 7x              |
| 28              | <i>Ceratotherium simum simum</i>      | ALLPATHS v. R41370                                  | Illumina Hi-Seq                               | 91x             |
| 29              | <i>Equus przewalskii</i>              | SOAPdenovo v. 1.05                                  | Illumina HiSeq                                | 85.63x          |

| No | Species                                         | Assembly Method                                                  | Sequencing Technology                        | Genome Coverage                          |
|----|-------------------------------------------------|------------------------------------------------------------------|----------------------------------------------|------------------------------------------|
| 30 | <i>Equus caballus</i> (Thoroughbred)            | ARACHNE 2.0                                                      | ?                                            | 6.8x                                     |
| 31 | <i>Equus caballus</i> (Mongolian)               | SOAPdenovo v. 1.05                                               | Illumina HiSeq                               | 90.57x                                   |
| 32 | <i>Manis pentadactyla</i>                       | SOAPdenovo v. May 2014                                           | Illumina                                     | 61x                                      |
| 33 | <i>Felis catus</i>                              | Celera Assembler v. 6.1                                          | Sanger; 454 Titanium                         | 2x Sanger;<br>12x 454                    |
| 34 | <i>Panthera tigris altaica</i>                  | SOAPdenovo v. 08-Jul-2011                                        | Illumina HiSeq 2000                          | 99x                                      |
| 35 | <i>Canis lupus familiaris</i>                   | Arachne v. April 2010                                            | Sanger                                       | 7x plus<br>>90Mb<br>finished<br>sequence |
| 36 | <i>Ursus maritimus</i>                          | SOAPdenovo v. 1.05                                               | Illumina Genome Analyzer II                  | 101x                                     |
| 37 | <i>Ailuropoda melanoleuca</i>                   | SOAPdenovo                                                       | Illumina GA                                  | 60x                                      |
| 38 | <i>Leptonychotes weddellii</i>                  | allpaths v. R41856<br>HAPLOIDIFY=True                            | Illumina HiSeq                               | 82x                                      |
| 39 | <i>Odobenus rosmarus divergens</i>              | AllPaths v. 41070;<br>Atlas-link v. 1.0;<br>Atlas-gapfill v. 2.2 | Illumina                                     | 200.0x                                   |
| 40 | <i>Mustela putorius furo</i>                    | ALLPATHS-LG v. R36167                                            | Illumina GA II; HiSeq 2000                   | 162x                                     |
| 41 | <i>Camelus dromedarius</i>                      | SOAPdenovo v. 1.05                                               | Illumina HiSeq2000                           | 65x                                      |
| 42 | <i>Camelus ferus</i>                            | SOAPdenovo v. V1.05                                              | Illumina GAIIX; 454 GS-FLX Titanium; SOLid 3 | 30x                                      |
| 43 | <i>Vicugna pacos</i>                            | Newbler v. May-2012                                              | Roche 454; ABI 3730                          | 22x                                      |
| 44 | <i>Sus scrofa</i> (Duroc)                       | SOAPdenovo v. 2.20 and Cortex v. 1.1                             | Illumina GAI                                 | 24x                                      |
| 45 | <i>Sus scrofa</i> (Tibetan)                     | SOAPdenovo v. 1.06                                               | Illumina HiSeq                               | 131.0x                                   |
| 46 | <i>Sus scrofa</i> (Ellegaard Gottingen minipig) | SOAPdenovo v. September 2011                                     | Illumina HiSeq                               | 79.0x                                    |
| 47 | <i>Balaenoptera acutorostrata scammoni</i>      | SOAPdenovo v. 16-Mar-2012                                        | Illumina HiSeq 2000                          | 92x                                      |
| 48 | <i>Physeter catodon</i>                         | AllPaths-LG v. January 2013                                      | Illumina                                     | 75x                                      |
| 49 | <i>Lipotes vexillifer</i>                       | SOAPdenovo v. 2.01                                               | Illumina Hiseq 2000                          | 115x                                     |
| 50 | <i>Tursiops truncatus</i>                       | Atlas, Atlas-Link, Atlas-GapFill v. June 2011                    | Sanger; 454 FLX; Illumina HighSeq            | 2.5x Sanger;<br>3.5x 454; 30x Illumina   |
| 51 | <i>Orcinus orca</i>                             | AllPaths v. 41070;<br>ATLAS-link v. 1.0;<br>ATLAS-gapfill v. 2.2 | Illumina HiSeq                               | 200.0x                                   |
| 52 | <i>Pantholops hodgsonii</i>                     | SOAPdenovo v. 2.1                                                | Illumina                                     | 67.0x                                    |
| 53 | <i>Capra hircus</i>                             | SOAPdenovo v. 1.03                                               | Illumina GA IIX                              | 86.64x                                   |
| 54 | <i>Ovis aries</i> (Texel)                       | SOAPdenovo v. 1.03                                               | Illumina GAI; 454                            | 142x<br>Illumina; 4x<br>454              |
| 55 | <i>Ovis aries musimon</i>                       | ?                                                                | ?                                            | ?                                        |

| No | Species                                | Assembly Method                                                                                              | Sequencing Technology               | Genome Coverage                 |
|----|----------------------------------------|--------------------------------------------------------------------------------------------------------------|-------------------------------------|---------------------------------|
| 56 | <i>Bubalus bubalis</i>                 | MaSuRCA v. 1.8.3                                                                                             | Illumina GAIIx; Illumina HiSeq; 454 | 70.0x                           |
| 57 | <i>Bison bison bison</i>               | MaSuRCA v. 2.1.0                                                                                             | 454; Illumina HiSeq                 | 60.0x                           |
| 58 | <i>Bos mutus</i>                       | SOAPdenovo v. 1.14                                                                                           | Illumina HiSeq; Illumina GA         | 130x                            |
| 59 | <i>Bos indicus</i>                     | BWA v. 0.5.9                                                                                                 | SOLiD                               | 52x                             |
| 60 | <i>Bos taurus</i>                      | UMD Overlapper v. 2009; additional processing                                                                | Sanger                              | 9x                              |
| 61 | <i>Ochotona princeps</i>               | Allpaths v. R41206                                                                                           | Illumina Hi-Seq                     | 103x                            |
| 62 | <i>Oryctolagus cuniculus</i>           | ?                                                                                                            | ABI                                 | 7.48X                           |
| 63 | <i>Ictidomys tridecemlineatus</i>      | ALLPATHS v. R37591                                                                                           | Illumina HiSeq                      | 495.1x                          |
| 64 | <i>Heterocephalus glaber</i>           | AllPaths v. R39605                                                                                           | Illumina HiSeq                      | 90x                             |
| 65 | <i>Fukomys damarensis</i>              | SOAPdenovo v. 1.06                                                                                           | Illumina Hiseq 2000                 | 140x                            |
| 66 | <i>Cavia aperea</i>                    | GCA_000151735.1                                                                                              | Illumina HiSeq                      | 333.0x                          |
| 67 | <i>Cavia porcellus</i>                 | unknown v. before 2008                                                                                       | Sanger                              | 6.8x                            |
| 68 | <i>Chinchilla lanigera</i>             | ALLPATHS v. R40776                                                                                           | Illumina Hi-Seq                     | 87x                             |
| 69 | <i>Octodon degus</i>                   | allpaths v. R40507 LITTLE_HELPES_BIG=False                                                                   | Illumina Hi-Seq                     | 80x                             |
| 70 | <i>Dipodomys ordii</i>                 | ?                                                                                                            | ?                                   | 2.02X                           |
| 71 | <i>Jaculus jaculus</i>                 | ALLPATHS v. R41689 HAPLOIDIFY=True                                                                           | Illumina Hi-Seq                     | 78x                             |
| 72 | <i>Nannospalax galili</i>              | SOAPdenovo v. 2.04.4                                                                                         | Illumina HiSeq 2000                 | 86x                             |
| 73 | <i>Mesocricetus auratus</i>            | allpaths v. R44683                                                                                           | Illumina HiSeq                      | 115x                            |
| 74 | <i>Cricetulus griseus</i>              | SOAPdenovo v. 1.05                                                                                           | Illumina GA IIx                     | 130x                            |
| 75 | <i>Microtus ochrogaster</i>            | allpaths v. R41985 HAPLOIDIFY=True SPRS_WRITE_SEPS=True                                                      | Illumina Hi-Seq                     | 94x                             |
| 76 | <i>Peromyscus maniculatus bairdii</i>  | Newbler v. 2.3 and 2.5; AllPaths v. 41070; ATLAS-gapfill v. 2.2; ATLAS-link v. 1.0                           | FLX 454; Illumina HiSeq             | 110.0x                          |
| 77 | <i>Rattus norvegicus</i>               | Newbler v. 2.0.0-PreRelease-01162009 paired with Phrap v. 0.990329 for Sanger reads; CLC bio for Solid reads | Sanger; SOLiD                       | 3x BAC; 6x WGS ABI Sanger reads |
| 78 | <i>Mus musculus</i>                    | ?                                                                                                            | ?                                   | ?                               |
| 79 | <i>Tupaia belangeri</i>                | ?                                                                                                            | ?                                   | 2x                              |
| 80 | <i>Tupaia chinensis</i>                | SOAPdenovo v. 1.05                                                                                           | Illumina HiSeq 2000                 | 80x                             |
| 81 | <i>Galeopterus variegatus</i>          | SOAPdenovo2 v. April 2014                                                                                    | Illumina                            | 55x                             |
| 82 | <i>Otolemur garnettii</i>              | ALLPATHS-LG v. R35710                                                                                        | Illumina GAIIx                      | 137x                            |
| 83 | <i>Microcebus murinus</i>              | ?                                                                                                            | ?                                   | 1.9x                            |
| 84 | <i>Tarsius syrichta</i>                | Celera v. DEC-2012                                                                                           | Sanger; 454; Illumina               | 48x                             |
| 85 | <i>Callithrix jacchus</i>              | PCAP v. 2009                                                                                                 | ABI 3730                            | 6.6x                            |
| 86 | <i>Saimiri boliviensis boliviensis</i> | AllPaths v. R37830                                                                                           | Illumina HiSeq                      | 80x                             |
| 87 | <i>Rhinopithecus roxellana</i>         | SOAPdenovo v. 2013.04                                                                                        | Illumina HiSeq                      | 53.7x                           |



| No                | Species                           | Assembly Method                                                                                                 | Sequencing Technology                | Genome Coverage                           |
|-------------------|-----------------------------------|-----------------------------------------------------------------------------------------------------------------|--------------------------------------|-------------------------------------------|
| 88                | <i>Nasalis larvatus</i>           | GCF_000002255.3;<br>Macaca mulatta NCBI<br>build 1.2                                                            | 454; Illumina HiSeq                  | 290.0x                                    |
| 89                | <i>Chlorocebus sabaues</i>        | ALLPATHS and Newbler<br>v. 13-Feb-2013                                                                          | 454 Titanium; Illumina<br>HiSeq; ABI | 95x                                       |
| 90                | <i>Macaca fascicularis</i>        | SOAPdenovo v. 1.0.5,<br>SRPRISM v. 2.4; ARGO<br>v. 0.1                                                          | Illumina HiSeq                       | 68x                                       |
| 91                | <i>Macaca mulatta</i>             | SOAPdenovo v. 1.0                                                                                               | Illumina GA                          | 50x                                       |
| 92                | <i>Papio anubis</i>               | CABOG v. 6.1;<br>ATLAS-LINK v. 1.0;<br>ATLAS-GAPFILL v. 2.0                                                     | Sanger 3730; 454 FLX;<br>Illumina    | 2.5x Sanger;<br>4.5x 454; 85x<br>Illumina |
| 93                | <i>Nomascus leucogenys</i>        | Arachne Assembler,<br>assisted with Human<br>NCBI build 36 (UCSC<br>hg18); Phrap for<br>mitochondrial sequences | Sanger                               | 5.6x in Q20<br>bases                      |
| 94                | <i>Pongo abelii</i>               | ?                                                                                                               | ?                                    | ?                                         |
| 95                | <i>Gorilla gorilla gorilla</i>    | ?                                                                                                               | ?                                    | ?                                         |
| 96                | <i>Pan paniscus</i>               | Celera Assembler v. 5.4.3                                                                                       | 454 GS FLX; 454 GS FLX<br>Titanium   | 26x                                       |
| 97                | <i>Pan troglodytes</i>            | PCAP                                                                                                            | ?                                    | 6x                                        |
| 98                | <i>Homo sapiens</i>               | ?                                                                                                               | ?                                    | ?                                         |
| <b>SAUROPSIDA</b> |                                   |                                                                                                                 |                                      |                                           |
| 99                | <i>Apalone spinifera</i>          | SOAPdenovo v. 1.0.5                                                                                             | Illumina PE                          | 33.4x                                     |
| 100               | <i>Pelodiscus sinensis</i>        | SOAPdenovo v. 1.05                                                                                              | Illumina HiSeq 2000                  | 105x                                      |
| 101               | <i>Chelonia mydas</i>             | SOAPdenovo v. 1.05                                                                                              | Illumina HiSeq2000                   | 110x                                      |
| 102               | <i>Chrysemys picta bellii</i>     | Newbler v. 2.6                                                                                                  | Sanger; 454; Illumina                | 15x                                       |
| 103               | <i>Struthio camelus australis</i> | SOAPdenovo v. 1.6                                                                                               | Illumina HiSeq                       | 85x                                       |
| 104               | <i>Tinamus guttatus</i>           | SOAPdenovo v. 1.6                                                                                               | Illumina HiSeq                       | 100x                                      |
| 105               | <i>Anas platyrhynchos</i>         | SOAPdenovo Release v.<br>1.03                                                                                   | Solexa                               | 60x                                       |
| 106               | <i>Lyrurus tetrrix tetrrix</i>    | SOAPdenovo+BWA v.<br>2012-10                                                                                    | SOLiD                                | 50.0x                                     |
| 107               | <i>Gallus gallus</i>              | Celera Assembler v. 5.4                                                                                         | Sanger; 454                          | 12x                                       |
| 108               | <i>Coturnix japonica</i>          | Soapdenovo v. 1.0.5b;<br>bwa v. 0.5.9; SSPACE v.<br>1.2                                                         | Illumina                             | 172x                                      |
| 109               | <i>Meleagris gallopavo</i>        | Celera v. 5.3 (modified)                                                                                        | 454-Titanium; Illumina<br>GAII       | 17x                                       |
| 110               | <i>Colinus virginianus</i>        | CLC de novo assembler v.<br>4.9                                                                                 | Illumina HiSeq                       | 77x                                       |
| 111               | <i>Acanthisitta chloris</i>       | SOAPdenovo v. 1.6                                                                                               | Illumina HiSeq                       | 29x                                       |
| 112               | <i>Manacus vitellinus</i>         | SOAPdenovo v. 1.6                                                                                               | Illumina HiSeq                       | 110x                                      |
| 113               | <i>Zonotrichia albicollis</i>     | Allpaths-LG v. Feb-2013                                                                                         | Illumina                             | 63x                                       |
| 114               | <i>Geospiza fortis</i>            | SOAPdenovo v. 2.01                                                                                              | Illumina HiSeq 2000                  | 115x                                      |
| 115               | <i>Serinus canaria</i>            | ?                                                                                                               | ?                                    | ?                                         |
| 116               | <i>Taeniopygia guttata</i>        | PCAP v. 2008                                                                                                    | Sanger                               | 5.5x                                      |
| 117               | <i>Ficedula albicollis</i>        | SOAPdenovo v. 1.05                                                                                              | Illumina GAII; Illumina<br>HiSeq     | 60.0x                                     |
| 118               | <i>Pseudopodoces humilis</i>      | SOAPdenovo v. 1.5                                                                                               | Illumina HiSeq                       | 96.25x                                    |

| No  | Species                                | Assembly Method                       | Sequencing Technology                                    | Genome Coverage      |
|-----|----------------------------------------|---------------------------------------|----------------------------------------------------------|----------------------|
| 119 | <i>Corvus brachyrhynchos</i>           | SOAPdenovo v. 1.6                     | Illumina HiSeq                                           | 80x                  |
| 120 | <i>Corvus cornix cornix</i>            | AllPaths v. Allpaths-LG version 41687 | Illumina HiSeq                                           | 152.0x               |
| 121 | <i>Ara macao</i>                       | CLC Genomics Workbench v. 4.9         | 454 GS FLX Titanium; Illumina GAIIX; Illumina HiSeq 2000 | 26x                  |
| 122 | <i>Amazona vittata</i>                 | Ray software v. 3                     | Illumina                                                 | 24.0x                |
| 123 | <i>Melopsittacus undulatus</i>         | Celera v. 6.1                         | 454; Illumina                                            | 16x 454; 7x Illumina |
| 124 | <i>Nestor notabilis</i>                | SOAPdenovo v. 1.6                     | Illumina HiSeq                                           | 32x                  |
| 125 | <i>Falco cherrug</i>                   | SOAPdenovo v. 1.4                     | Illumina HiSeq                                           | 147.0x               |
| 126 | <i>Falco peregrinus</i>                | SOAPdenovo v. 1.4                     | Illumina HiSeq                                           | 137.6x               |
| 127 | <i>Cariama cristata</i>                | SOAPdenovo v. 1.6                     | Illumina HiSeq                                           | 24x                  |
| 128 | <i>Merops nubicus</i>                  | SOAPdenovo v. 1.6                     | Illumina HiSeq                                           | 37x                  |
| 129 | <i>Picoides pubescens</i>              | SOAPdenovo v. 1.6                     | Illumina HiSeq                                           | 105x                 |
| 130 | <i>Buceros rhinoceros silvestris</i>   | SOAPdenovo v. 1.6                     | Illumina HiSeq                                           | 35x                  |
| 131 | <i>Apaloderma vittatum</i>             | SOAPdenovo v. 1.6                     | Illumina HiSeq                                           | 28x                  |
| 132 | <i>Leptosomus discolor</i>             | SOAPdenovo v. 1.6                     | Illumina HiSeq                                           | 32x                  |
| 133 | <i>Haliaeetus albicilla</i>            | SOAPdenovo v. 1.6                     | Illumina HiSeq                                           | 26x                  |
| 134 | <i>Haliaeetus leucocephalus</i>        | SOAPdenovo2 v. May 2014               | Illumina                                                 | 103x                 |
| 135 | <i>Aquila chrysaetos Canadensis</i>    | AllPaths-LG v. August 2013            | Illumina                                                 | 88x                  |
| 136 | <i>Cathartes aura</i>                  | SOAPdenovo v. 1.6                     | Illumina HiSeq                                           | 25x                  |
| 137 | <i>Tyto alba</i>                       | SOAPdenovo v. 1.6                     | Illumina HiSeq                                           | 27x                  |
| 138 | <i>Colius striatus</i>                 | SOAPdenovo v. 1.6                     | Illumina HiSeq                                           | 27x                  |
| 139 | <i>Charadrius vociferus</i>            | SOAPdenovo v. 1.6                     | Illumina HiSeq                                           | 100x                 |
| 140 | <i>Balearica regulorum gibbericeps</i> | SOAPdenovo v. 1.6                     | Illumina HiSeq                                           | 33x                  |
| 141 | <i>Chlamydotis macqueenii</i>          | SOAPdenovo v. 1.6                     | Illumina HiSeq                                           | 27x                  |
| 142 | <i>Cuculus canorus</i>                 | SOAPdenovo v. 1.6                     | Illumina HiSeq                                           | 100x                 |
| 143 | <i>Fulmarus glacialis</i>              | SOAPdenovo v. 1.6                     | Illumina HiSeq                                           | 33x                  |
| 144 | <i>Aptenodytes forsteri</i>            | SOAPdenovo v. 1.6                     | Illumina HiSeq                                           | 60x                  |
| 145 | <i>Pygoscelis adeliae</i>              | SOAPdenovo v. 1.6                     | Illumina HiSeq                                           | 60x                  |
| 146 | <i>Phalacrocorax carbo</i>             | SOAPdenovo v. 1.6                     | Illumina HiSeq                                           | 24x                  |
| 147 | <i>Pelecanus crispus</i>               | SOAPdenovo v. 1.6                     | Illumina HiSeq                                           | 34x                  |
| 148 | <i>Nipponia nippon</i>                 | SOAPdenovo v. 1.6                     | Illumina HiSeq                                           | 105x                 |
| 149 | <i>Egretta garzetta</i>                | SOAPdenovo v. 1.6                     | Illumina HiSeq                                           | 74x                  |
| 150 | <i>Phaethon lepturus</i>               | SOAPdenovo v. 1.6                     | Illumina HiSeq                                           | 39x                  |
| 151 | <i>Gavia stellata</i>                  | SOAPdenovo v. 1.6                     | Illumina HiSeq                                           | 33x                  |
| 152 | <i>Tauraco erythrolophus</i>           | SOAPdenovo v. 1.6                     | Illumina HiSeq                                           | 30x                  |
| 153 | <i>Opisthocomus hoazin</i>             | SOAPdenovo v. 1.6                     | Illumina HiSeq                                           | 100x                 |
| 154 | <i>Columba livia</i>                   | SOAPdenovo v. 2.0                     | Illumina HiSeq 2000                                      | 60x                  |
| 155 | <i>Pterocles gutturalis</i>            | SOAPdenovo v. 1.6                     | Illumina HiSeq                                           | 25x                  |
| 156 | <i>Calypte anna</i>                    | SOAPdenovo v. 1.6                     | Illumina HiSeq                                           | 110x                 |
| 157 | <i>Chaetura pelagica</i>               | SOAPdenovo v. 1.6                     | Illumina GA II                                           | 106x                 |
| 158 | <i>Caprimulgus carolinensis</i>        | SOAPdenovo v. 1.6                     | Illumina HiSeq                                           | 30x                  |
| 159 | <i>Eurypyga helias</i>                 | SOAPdenovo v. 1.6                     | Illumina HiSeq                                           | 33x                  |
| 160 | <i>Mesitornis unicolor</i>             | SOAPdenovo v. 1.6                     | Illumina HiSeq                                           | 29x                  |

| No                 | Species                            | Assembly Method                                             | Sequencing Technology       | Genome Coverage              |
|--------------------|------------------------------------|-------------------------------------------------------------|-----------------------------|------------------------------|
| 161                | <i>Podiceps cristatus</i>          | SOAPdenovo v. 1.6                                           | Illumina HiSeq              | 30x                          |
| 162                | <i>Phoenicopterus ruber ruber</i>  | SOAPdenovo v. 1.6                                           | Illumina HiSeq              | 33x                          |
| 163                | <i>Alligator mississippiensis</i>  | Allpaths v. R41313;<br>manual scaffolding                   | Illumina                    | 68x                          |
| 164                | <i>Alligator sinensis</i>          | SOAPdenovo v. 1.05                                          | Illumina GA II              | 109x                         |
| 165                | <i>Crocodylus porosus</i>          | AllPaths v. R41313                                          | Illumina                    | 74.0x                        |
| 166                | <i>Gavialis gangeticus</i>         | SOAPdenovo v. 2.04.3                                        | Illumina                    | 81.0x                        |
| 167                | <i>Pogona vitticeps</i>            | -                                                           | Illumina HiSeq 2000         | 83x                          |
| 168                | <i>Anolis carolinensis</i>         | Arachne v. 3.0.0                                            | ABI                         | 7.10x                        |
| 169                | <i>Vipera berus berus</i>          | AllPaths LG v. v41070                                       | Illumina                    | 121.0x                       |
| 170                | <i>Crotalus mitchellii pyrrhus</i> | CLC NGS Cell v. June 2013                                   | Illumina HiSeq              | 40.0x                        |
| 171                | <i>Ophiophagus hannah</i>          | CLC NGS Cell v. 2011                                        | Illumina HiSeq              | 28.0x                        |
| 172                | <i>Python bivittatus</i>           | Soap deNovo v. March 2012                                   | Illumina; 454               | 20x                          |
| <b>AMPHIBIA</b>    |                                    |                                                             |                             |                              |
| 173                | <i>Nanorana parkeri</i>            | SOAPdenovo v. 1.06                                          | Illumina Genome Analyzer II | 83x                          |
| 174                | <i>Xenopus tropicalis</i>          | ARACHNE v. 20071016_modified                                | ABI 3739                    | 7.44x                        |
| <b>NEOPTERYGII</b> |                                    |                                                             |                             |                              |
| 175                | <i>Lepisosteus oculatus</i>        | AllPaths v. R38293                                          | Illumina HiSeq              | 677.5x                       |
| 176                | <i>Anguilla anguilla</i>           | C bio Genomics Workbench v. 3.6.5.                          | Illumina GAIIX              | 20.0x                        |
| 177                | <i>Anguilla japonica</i>           | CLC NGS Cell v. 3.2;<br>CLC NGS Cell v. 4.0beta             | Illumina GAI                | 35.0x                        |
| 178                | <i>Danio rerio</i>                 | ?                                                           | ?                           | ?                            |
| 179                | <i>Astyanax mexicanus</i>          | AllPathsLG v. Jan-2013                                      | Illumina                    | 70x                          |
| 180                | <i>Oryzias latipes</i>             | ?                                                           | ?                           | ?                            |
| 181                | <i>Poecilia formosa</i>            | AllPaths-LG v. July 2013                                    | Illumina                    | 82x                          |
| 182                | <i>Xiphophorus maculatus</i>       | PCAP v. 3/30/09;<br>Newbler v.<br>MapAsmResearch-02/17/2010 | 454; ABI 3730               | 19.6x                        |
| 183                | <i>Fundulus heteroclitus</i>       | AllPaths-LG v. November 2012                                | Illumina                    | 75x                          |
| 184                | <i>Takifugu flavidus</i>           | HAPs v. 0.2.2                                               | SOLiD                       | 131.0x                       |
| 185                | <i>Takifugu rubripes</i>           | ?                                                           | ?                           | ?                            |
| 186                | <i>Tetraodon nigroviridis</i>      | ?                                                           | ?                           | ?                            |
| 187                | <i>Cynoglossus semilaevis</i>      | SOAPdenovo v. April-2011                                    | Illumina HiSeq2000          | 117x (male);<br>94x (female) |
| 188                | <i>Haplochromis burtoni</i>        | ALLPATHS-LG v. R35951                                       | Illumina HiSeq              | 131x                         |
| 189                | <i>Pundamilia nyererei</i>         | ALLPATHS-LG v. R37016                                       | Illumina HiSeq              | 126x                         |
| 190                | <i>Maylandia zebra</i>             | AllPaths v. R37043                                          | Illumina HiSeq              | 129.7x                       |
| 191                | <i>Neolamprologus brichardi</i>    | ALLPATHS-LG v. R36800                                       | Illumina HiSeq              | 171x                         |
| 192                | <i>Oreochromis niloticus</i>       | AllPaths-LG v. R35292                                       | Illumina                    | 269x                         |

| No                    | Species                           | Assembly Method                                                                                              | Sequencing Technology                  | Genome Coverage |
|-----------------------|-----------------------------------|--------------------------------------------------------------------------------------------------------------|----------------------------------------|-----------------|
| 193                   | <i>Sebastes nigrocinctus</i>      | SOAPdenovo v. 1.05                                                                                           | Illumina HiSeq                         | 71.0x           |
| 194                   | <i>Sebastes rubrivinctus</i>      | SOAPdenovo v. 1.05                                                                                           | Illumina HiSeq                         | 87.0x           |
| 195                   | <i>Gasterosteus aculeatus</i>     | ?                                                                                                            | ?                                      | ?               |
| 196                   | <i>Gadus morhua</i>               | ?                                                                                                            | ?                                      | ?               |
| <b>CHONDRICHTHYES</b> |                                   |                                                                                                              |                                        |                 |
| 197                   | <i>Callorhinchus milii</i>        | Celera v. 6.1                                                                                                | 454 Titanium; Sanger ABI 3730          | 19.25x          |
| 198                   | <i>Carcharhinus brachyurus</i>    | SOAPdenovo                                                                                                   | Illumina 100 PE                        | -               |
| <b>ECDYSOZOA</b>      |                                   |                                                                                                              |                                        |                 |
| 199                   | <i>Ephemera danica</i>            | AllPaths v. 35218;<br>ATLAS-link v. 1.0;<br>ATLAS-gapfill v. 2.2                                             | Illumina HiSeq                         | 207.7x          |
| 200                   | <i>Ladona fulva</i>               | AllPaths v. 35218;<br>ATLAS-link v. 1.0;<br>ATLAS-gapfill v. 2.2                                             | Illumina HiSeq                         | 131.2x          |
| 201                   | <i>Pediculus humanus corporis</i> | ?                                                                                                            | ?                                      | 8x              |
| 202                   | <i>Frankliniella occidentalis</i> | AllPaths LG v. 44620;<br>Atlas Link v. 1.0; Atlas<br>GapFill v. 2.2                                          | Illumina                               | 158.7x          |
| 203                   | <i>Diaphorina citri</i>           | PBJelly v. 2013                                                                                              | Illumina HiSeq; PacBio                 | 180.0x          |
| 204                   | <i>Pachypsylla venusta</i>        | AllPaths LG v. 44620;<br>ATLAS-link v. 1.0;<br>ATLAS-gapfill v. 2.2                                          | Illumina                               | 181.4x          |
| 205                   | <i>Acyrtosiphon pisum</i>         | Newbler v.<br>2.3-PreRelease-09142009;<br>phrap version 1.080812;<br>atlas-link0.5;<br>atlas-overlapper-1.70 | Sanger; 454                            | 15x             |
| 206                   | <i>Nilaparvata lugens</i>         | SOAPdenovo v. 1.05                                                                                           | Illumina HiSeq 2000;<br>Illumina GA-II | 133.27x         |
| 207                   | <i>Oncopeltus fasciatus</i>       | AllPaths LG v. 44620;<br>Atlas Link v. 1.0; Atlas<br>GapFill v. 2.2                                          | Illumina                               | 106.9x          |
| 208                   | <i>Rhodnius prolixus</i>          | Celera assembler v. 6.0                                                                                      | ABI 3730; 454                          | 8.1x            |
| 209                   | <i>Cimex lectularius</i>          | AllPaths LG v. 35218;<br>Atlas Link v. v1.0; Atlas<br>GapFill v. v2.2                                        | Illumina                               | 163.4x          |
| 210                   | <i>Onthophagus taurus</i>         | AllPaths LG v. 44620;<br>Atlas Link v. v1.0; Atlas<br>GapFill v. v2.2                                        | Illumina                               | 86.0x           |
| 211                   | <i>Agrilus planipennis</i>        | AllPaths LG v. 44620;<br>Atlas Link v. 1.0; Atlas<br>GapFill v. 2.2                                          | Illumina                               | 124.7x          |
| 212                   | <i>Tribolium castaneum</i>        | ?                                                                                                            | ?                                      | 7.3x            |
| 213                   | <i>Anoplophora glabripennis</i>   | AllPaths v. 35218;<br>ATLAS-link v. 1.0;<br>ATLAS-gapfill v. 2.2                                             | Illumina HiSeq                         | 121.0x          |
| 214                   | <i>Leptinotarsa decemlineata</i>  | AllPaths v. 35218;<br>ATLAS-link v. 1.0;<br>ATLAS-gapfill v. 2.0                                             | Illumina HiSeq                         | 52.3x           |

| No  | Species                          | Assembly Method                                                                                            | Sequencing Technology       | Genome Coverage |
|-----|----------------------------------|------------------------------------------------------------------------------------------------------------|-----------------------------|-----------------|
| 215 | <i>Dendroctonus ponderosae</i>   | ABYSS v. 1.3.0                                                                                             | Illumina GAI                | 443.0x          |
| 216 | <i>Mengenilla moldrzyki</i>      | Newbler v. 2.3                                                                                             | 454 GS-FLX Titanium (Roche) | 16x             |
| 217 | <i>Aedes aegypti</i>             | ?                                                                                                          | ?                           | 7.6x            |
| 218 | <i>Culex quinquefasciatus</i>    | ?                                                                                                          | ?                           | 6.14x           |
| 219 | <i>Anopheles albimanus</i>       | allpaths v. R43019                                                                                         | Illumina                    | 95.0x           |
| 220 | <i>Anopheles arabiensis</i>      | allpaths v. R43436                                                                                         | Illumina                    | 100.0x          |
| 221 | <i>Anopheles atroparvus</i>      | allpaths v. R46504                                                                                         | Illumina                    | 98.0x           |
| 222 | <i>Anopheles christyi</i>        | allpaths v. R44024                                                                                         | Illumina                    | 35.0x           |
| 223 | <i>Anopheles culicifacies</i>    | allpaths v. R46449                                                                                         | Illumina                    | 31.0x           |
| 224 | <i>Anopheles darlingi</i>        | Celera Assembler v. 6.1                                                                                    | 454                         | 20.0x           |
| 225 | <i>Anopheles dirus</i>           | allpaths v. R43500                                                                                         | Illumina                    | 184.0x          |
| 226 | <i>Anopheles epiroticus</i>      | allpaths v. R43500                                                                                         | Illumina                    | 49.0x           |
| 227 | <i>Anopheles farauti</i>         | allpaths v. R47616                                                                                         | Illumina                    | 233.0x          |
| 228 | <i>Anopheles funestus</i>        | allpaths v. R43460                                                                                         | Illumina                    | 135.0x          |
| 229 | <i>Anopheles gambiae</i>         | ?                                                                                                          | ?                           | 10x             |
| 230 | <i>Anopheles maculatus</i>       | allpaths v. R46504                                                                                         | Illumina                    | 25.0x           |
| 231 | <i>Anopheles melas</i>           | allpaths v. R47956                                                                                         | Illumina                    | 147.0x          |
| 232 | <i>Anopheles merus</i>           | allpaths v. R47616                                                                                         | Illumina                    | 147.0x          |
| 233 | <i>Anopheles minimus</i>         | allpaths v. R43460                                                                                         | Illumina                    | 211.0x          |
| 234 | <i>Anopheles quadriannulatus</i> | allpaths v. R43436                                                                                         | Illumina                    | 93.0x           |
| 235 | <i>Anopheles sinensis</i>        | Celera Assembler v. 6.1                                                                                    | 454                         | 30.0x           |
| 236 | <i>Anopheles stephensi</i>       | Newbler v. 2.8                                                                                             | 454; PacBio; Illumina GAI   | 16.0x           |
| 237 | <i>Mayetiola destructor</i>      | ?                                                                                                          | ?                           | ?               |
| 238 | <i>Lutzomyia longipalpis</i>     | Celera Assembler v. 6.1                                                                                    | 454                         | 38.9x           |
| 239 | <i>Phlebotomus papatasi</i>      | Newbler v. 2.6RC02                                                                                         | 454; Sanger                 | 15.1x           |
| 240 | <i>Ceratitidis capitata</i>      | AllPaths v. 35218; ATLAS-link v. 1.0; ATLAS-gapfill v. 2.2                                                 | Illumina HiSeq              | 152.5x          |
| 241 | <i>Drosophila albomicans</i>     | SOAPdenovo v. 1.04                                                                                         | Illumina GAI                | 100.0x          |
| 242 | <i>Drosophila ananassae</i>      | ?                                                                                                          | ?                           | 8.9x            |
| 243 | <i>Drosophila biarmipes</i>      | Celera Assembler v. 6.1; BWA v. 0.6.0; Samtools v. 0.1.14; GATK v. 1.1-9; Indel_call_and_upgrade.pl v. 1.0 | Illumina; 454               | 186.9x          |
| 244 | <i>Drosophila bipectinata</i>    | Celera Assembler v. 6.1; BWA v. 0.6.0; Samtools v. 0.1.14; GATK v. 1.1-9; Indel_call_and_upgrade.pl v. 1.0 | 454; Illumina               | 266.3x          |
| 245 | <i>Drosophila elegans</i>        | Celera Assembler v. 6.1; BWA v. 0.6.0; Samtools v. 0.1.14; GATK v. 1.1-9; Indel_call_and_upgrade.pl v. 1.0 | 454; Illumina               | 204.9x          |
| 246 | <i>Drosophila erecta</i>         | ?                                                                                                          | ?                           | 10.6x           |

| No  | Species                                       | Assembly Method                                                                                            | Sequencing Technology | Genome Coverage         |
|-----|-----------------------------------------------|------------------------------------------------------------------------------------------------------------|-----------------------|-------------------------|
| 247 | <i>Drosophila eugracilis</i>                  | Celera Assembler v. 6.1; BWA v. 0.6.0; Samtools v. 0.1.14; GATK v. 1.1-9; Indel_call_and_upgrade.pl v. 1.0 | 454; Illumina         | 218.1x                  |
| 248 | <i>Drosophila ficusphila</i>                  | Celera Assembler v. 6.1; BWA v. 0.6.0; Samtools v. 0.1.14; GATK v. 1.1-9; Indel_call_and_upgrade.pl v. 1.0 | 454; Illumina         | 208.7x                  |
| 249 | <i>Drosophila grimshawi</i>                   | ?                                                                                                          | ?                     | 7.9x                    |
| 250 | <i>Drosophila kikawai</i>                     | Celera Assembler v. 6.1; BWA v. 0.6.0; Samtools v. 0.1.14; GATK v. 1.1-9; Indel_call_and_upgrade.pl v. 1.0 | 454; Illumina         | 181.7x                  |
| 251 | <i>Drosophila melanogaster</i>                | ?                                                                                                          | ?                     | ?                       |
| 252 | <i>Drosophila miranda</i>                     | Newbler v. 2.6                                                                                             | Illumina HiSeq; 454   | 95.0x                   |
| 253 | <i>Drosophila mojavensis</i>                  | ?                                                                                                          | ?                     | 8.2x                    |
| 254 | <i>Drosophila persimilis</i>                  | ?                                                                                                          | ?                     | 4.1x                    |
| 255 | <i>Drosophila pseudoobscura pseudoobscura</i> | PBJelly v. 12.8.2; Atlas genome assembly                                                                   | Sanger; PacBio        | 9.7x Sanger; 24x PacBio |
| 256 | <i>Drosophila rhopaloa</i>                    | Celera Assembler v. 6.1; BWA v. 0.6.0; Samtools v. 0.1.14; GATK v. 1.1-9; Indel_call_and_upgrade.pl v. 1.0 | 454; Illumina GAIIx   | 214.5x                  |
| 257 | <i>Drosophila sechellia</i>                   | ?                                                                                                          | ?                     | 4.9x                    |
| 258 | <i>Drosophila simulans</i>                    | ?                                                                                                          | ?                     | ?                       |
| 259 | <i>Drosophila suzukii</i>                     | SOAPdenovo v. 2                                                                                            | Illumina GA IIx       | 195x                    |
| 260 | <i>Drosophila takahashii</i>                  | Celera Assembler v. 6.1; BWA v. 0.6.0; Samtools v. 0.1.14; GATK v. 1.1-9; Indel_call_and_upgrade.pl v. 1.0 | 454; Illumina GAIIx   | 242.1x                  |
| 261 | <i>Drosophila virilis</i>                     | ?                                                                                                          | ?                     | 8.0x                    |
| 262 | <i>Drosophila willistoni</i>                  | ?                                                                                                          | ?                     | ?                       |
| 263 | <i>Drosophila yakuba</i>                      | ?                                                                                                          | ?                     | 9.1x                    |
| 264 | <i>Musca domestica</i>                        | AllPathsLG v. September 2012                                                                               | Illumina              | 76x                     |
| 265 | <i>Glossina austeni</i>                       | ALLPATHS-LG v. August 2013                                                                                 | Illumina              | 62x                     |
| 266 | <i>Glossina brevipalpis</i>                   | ALLPATHS-LG v. August 2013                                                                                 | Illumina              | 81x                     |
| 267 | <i>Glossina fuscipes fuscipes</i>             | ALLPATHS-LG v. September 2013                                                                              | Illumina              | 120x                    |
| 268 | <i>Glossina morsitans morsitans</i>           | ?                                                                                                          | ?                     | ?                       |
| 269 | <i>Glossina pallidipes</i>                    | ALLPATHS-LG v. August 2013                                                                                 | Illumina              | 78x                     |

| No  | Species                               | Assembly Method                                                         | Sequencing Technology                        | Genome Coverage             |
|-----|---------------------------------------|-------------------------------------------------------------------------|----------------------------------------------|-----------------------------|
| 270 | <i>Limnephilus lunatus</i>            | AllPaths LG v. version 35218; Atlas Link v. v1.0; Atlas GapFill v. v2.2 | Illumina                                     | 80.1x                       |
| 271 | <i>Papilio glaucus</i>                | platanus v. MAY-2014                                                    | Illumina HiSeq                               | 72x                         |
| 272 | <i>Papilio polytes</i>                | Platanus v. 1.2.1                                                       | Illumina HiSeq2000                           | 595x                        |
| 273 | <i>Papilio xuthus</i>                 | Platanus v. 1.2.1                                                       | Illumina HiSeq2500                           | 300x                        |
| 274 | <i>Heliconius melpomene melpomene</i> | ?                                                                       | ?                                            | ?                           |
| 275 | <i>Melitaea cinxia</i>                | SOAPdenovo v. 1.05 ; Newbler v. 2.6 ; MIP Scaffolder v. MARCH-2012      | Illumina; 454; SOLiD                         | 70.0x                       |
| 276 | <i>Danaus plexippus</i>               | CLC bio's de novo assembler SSPACE v. 1.0; GapCloser                    | 454 GS-FLX Titanium; Illumina GAIIx          | 74.7x                       |
| 277 | <i>Bombyx mori</i>                    | ?                                                                       | ?                                            | ?                           |
| 278 | <i>Manduca sexta</i>                  | Newbler v. 2.3                                                          | 454                                          | 80.7x                       |
| 279 | <i>Plutella xylostella</i>            | BAC by BAC v. JUN-2011 (Rabbit software)                                | Illumina Hiseq2000                           | 141x (10X fos-mid+131X WGS) |
| 280 | <i>Athalia rosae</i>                  | AllPaths v. v35218; ATLAS-link v. v1.0; ATLAS-gapfill v. v2.2           | Illumina HiDrw                               | 467.2x                      |
| 281 | <i>Cephus cinctus</i>                 | SOAPdenovo v. Apr-2012                                                  | Illumina GAI; Illumina GAIIx; Illumina HiSeq | 56.0x                       |
| 282 | <i>Orussus abietinus</i>              | AllPaths v. 35218; ATLAS-link v. 1.0; ATLAS-gapfill v. 2.2              | Illumina HiSeq                               | 467.1x                      |
| 283 | <i>Ceratosolen solmsi marchali</i>    | SOAPdenovo v. 2                                                         | Illumina HS2000                              | 93x                         |
| 284 | <i>Nasonia giraulti</i>               | ?                                                                       | Sanger; Illumina Solexa                      | 1x Sanger; 10x Solexa       |
| 285 | <i>Nasonia longicornis</i>            | ?                                                                       | Sanger; Illumina Solexa                      | 1x Sanger; 10x Solexa       |
| 286 | <i>Nasonia vitripennis</i>            | Atlas-overlapper v. 2008; Phrap; Atlas-scaffold                         | ABI                                          | 6x                          |
| 287 | <i>Copidosoma floridanum</i>          | AllPaths LG v. Version 35218; Atlas Link v. v1.0; Atlas GapFill v. v2.2 | Illumina                                     | 139.0x                      |
| 288 | <i>Trichogramma pretiosum</i>         | AllPaths v. v44620; Atlas Link v. v1.0; Atlas GapFill v. v2.2           | Illumina                                     | 232.7x                      |
| 289 | <i>Microplitis demolitor</i>          | SOAPdenovo v. December 2012                                             | Illumina HiSeq                               | 26.0x                       |
| 290 | <i>Megachile rotundata</i>            | SOAPdenovo Assembler v. 1.05                                            | Illumina GA IIx                              | 300x                        |
| 291 | <i>Apis dorsata</i>                   | SOAPdenovo v. 1.05                                                      | Illumina GAI                                 | 60.0x                       |
| 292 | <i>Apis florea</i>                    | Newbler v. 2.3-PreRelease-10/19/2009 and Phrap                          | 454                                          | 20.5x                       |

| No  | Species                             | Assembly Method                                                  | Sequencing Technology                                                           | Genome Coverage       |
|-----|-------------------------------------|------------------------------------------------------------------|---------------------------------------------------------------------------------|-----------------------|
| 293 | <i>Apis mellifera</i>               | Atlas assembly system v. before 2011                             | Sanger; SOLiD; 454                                                              | 8x                    |
| 294 | <i>Bombus impatiens</i>             | SOAPdenovo v. 1.05                                               | Illumina GAIIX                                                                  | 127x                  |
| 295 | <i>Bombus terrestris</i>            | Newbler v. 2.3-PreRelease-10/19/2009 and Phrap                   | 454                                                                             | 21.4x                 |
| 296 | <i>Linepithema humile</i>           | CABOG v. 5.3                                                     | 454; Illumina                                                                   | 30x                   |
| 297 | <i>Camponotus floridanus</i>        | SOAPdenovo v. 1.0                                                | Illumina GA                                                                     | 100x                  |
| 298 | <i>Acromyrmex echinatior</i>        | SOAPdenovo v. 1.04                                               | Illumina HiSeq 2000                                                             | 107x                  |
| 299 | <i>Atta cephalotes</i>              | 454 GS De novo assembler software R&D v. 03/06/2010              | 454 Titanium including shotgun, 8-kbp and 20-kbp paired-end sequencing datasets | 18-20x                |
| 300 | <i>Solenopsis invicta</i>           | SOAPdenovo v. 1.04; Newbler v. 2.3                               | 454; Illumina                                                                   | 15x 454; 30x Illumina |
| 301 | <i>Pogonomyrmex barbatus</i>        | CABOG v. 5.3                                                     | 454                                                                             | 10.5-12x              |
| 302 | <i>Harpegnathos saltator</i>        | SOAPdenovo v. 1.0                                                | Illumina GA                                                                     | 100x                  |
| 303 | <i>Cerapachys biroi</i>             | SOAPdenovo v. V2.05                                              | Illumina HiSeq; 454                                                             | 123.0x                |
| 304 | <i>Blattella germanica</i>          | AllPaths LG v. 44620; Atlas Link v. 1.0; Atlas GapFill v. 2.2    | Illumina                                                                        | 158.5x                |
| 305 | <i>Zootermopsis nevadensis</i>      | SOAPdenovo v. 2.04                                               | Illumina HiSeq                                                                  | 98.0x                 |
| 306 | <i>Daphnia pulex</i>                | JAZZ v. 1.0 (4/11/2006)                                          | Sanger                                                                          | 8.7x                  |
| 307 | <i>Eurytemora affinis</i>           | AllPaths LG v. v44620; ATLAS-link v. v1.0; ATLAS-gapfill v. v2.2 | Illumina                                                                        | 75.0x                 |
| 308 | <i>Hyaella azteca</i>               | AllPaths LG v. 48744; Atlas Link v. 1.0; Atlas GapFill v. 2.2    | Illumina                                                                        | 105.0x                |
| 309 | <i>Strigamia maritima</i>           | Celera Assembler v. 6.1                                          | 454                                                                             | 23x                   |
| 310 | <i>Stegodyphus mimosarum</i>        | SOAPdenovo v. 2                                                  | Illumina Hiseq 2000                                                             | 70x                   |
| 311 | <i>Latrodectus hesperus</i>         | AllPaths LG v. 35218; Atlas Link v. 1.0; Atlas GapFill v. 2.2    | Illumina                                                                        | 48.0x                 |
| 312 | <i>Parasteatoda tepidariorum</i>    | AllPaths v. 35218; ATLAS-link v. 1.0; ATLAS-gapfill v. 2.2       | Illumina HiSeq                                                                  | 96.9x                 |
| 313 | <i>Tetranychus urticae</i>          | ?                                                                | ?                                                                               | ?                     |
| 314 | <i>Dermatophagoides farinae</i>     | AllPaths v. 39075; Velvet v. 1.1.03; SOAPdenovo v. 1.05          | Illumina HiSeq                                                                  | 436.0x                |
| 315 | <i>Sarcoptes scabiei type canis</i> | Minia v. 1.6088; SSPACE Standard v. 3.0                          | Illumina                                                                        | 174.0x                |
| 316 | <i>Achipteria coleoptrata</i>       | Platanus v. 1.2.1                                                | Illumina HiSeq                                                                  | 90.0x                 |
| 317 | <i>Hypochthonius rufulus</i>        | Platanus v. 1.2.1                                                | Illumina HiSeq                                                                  | 70.0x                 |
| 318 | <i>Platynothrus peltifer</i>        | ABYSS v. 1.3.5                                                   | Illumina GAIIX                                                                  | 19.0x                 |
| 319 | <i>Steganacarus magnus</i>          | ABYSS v. 1.3.5                                                   | Illumina GAIIX                                                                  | 17.0x                 |
| 320 | <i>Ixodes ricinus</i>               | CLC NGS Cell v. 7.4                                              | Illumina HiSeq                                                                  | 47.0x                 |
| 321 | <i>Ixodes scapularis</i>            | ?                                                                | ?                                                                               | ?                     |
| 322 | <i>Rhipicephalus microplus</i>      | Newbler v. 2.0.00.20; Cap3 v.d. 05/04/15                         | 454                                                                             | 3.41x                 |



| No                     | Species                                   | Assembly Method                                                  | Sequencing Technology                  | Genome Coverage |
|------------------------|-------------------------------------------|------------------------------------------------------------------|----------------------------------------|-----------------|
| 323                    | <i>Metaseiulus occidentalis</i>           | Celera v. 6.1                                                    | 454 XLR                                | 17.7x           |
| 324                    | <i>Varroa destructor</i>                  | Celera Assembler v. 5.2                                          | 454                                    | 5x              |
| 325                    | <i>Centruroides exilicauda</i>            | AllPaths v. 35218;<br>ATLAS-link v. 1.0;<br>ATLAS-gapfill v. 2.2 | Illumina HiSeq                         | 181.1x          |
| 326                    | <i>Mesobuthus martensii</i>               | Velvet v. 1.1.04                                                 | Illumina HiSeq; Illumina<br>GAIIx; 454 | 200.0x          |
| 327                    | <i>Limulus polyphemus</i>                 | Newbler v. May 2013                                              | Roche 454                              | 18x             |
| 328                    | <i>Trichinella spiralis</i>               | PCAP v. January 12,<br>2007                                      | ABI 3730                               | 34.6x           |
| 329                    | <i>Ascaris suum</i>                       | SOAPdenovo v. 1.04                                               | Illumina HiSeq 2000                    | 90x             |
| 330                    | <i>Elaeophora elaphi</i>                  | ?                                                                | ?                                      | ?               |
| 331                    | <i>Onchocerca volvulus</i>                | ?                                                                | ?                                      | ?               |
| 332                    | <i>Steinernema monticolum</i>             | Velvet v. 1.2.07                                                 | Illumina GAIIx                         | 61.0x           |
| 333                    | <i>Panagrellus redivivus</i>              | Velvet v. 1.2.07                                                 | Illumina HiSeq                         | 100.0x          |
| 334                    | <i>Haemonchus contortus</i>               | ?                                                                | ?                                      | ?               |
| 335                    | <i>Necator americanus</i>                 | Newbler v.<br>MapAsmResearch-<br>04/19/2010-patch-<br>08/17/2010 | 454                                    | 26.15x          |
| 336                    | <i>Heterorhabditis<br/>bacteriophora</i>  | Celera assembler v. 6.0                                          | 454; ABI 3730                          | 26.1x           |
| 337                    | <i>Caenorhabditis angaria</i>             | Velvet v. 0.7.56                                                 | Illumina                               | 170x            |
| 338                    | <i>Caenorhabditis brenneri</i>            | PCAP v. 9/3/04                                                   | ABI                                    | 9.5x            |
| 339                    | <i>Caenorhabditis briggsae</i>            | ?                                                                | ?                                      | ?               |
| 340                    | <i>Caenorhabditis elegans</i>             | ?                                                                | ?                                      | ?               |
| 341                    | <i>Caenorhabditis japonica</i>            | Celera assembler v. 6.0                                          | ABI; 454                               | 22x             |
| 342                    | <i>Caenorhabditis sp. 11<br/>MAF-2010</i> | Celera assembler v. 6.0                                          | 454 Titanium                           | 20.2x           |
| 343                    | <i>Priapulus caudatus</i>                 | AllPaths-LG v. February<br>2013                                  | Illumina                               | 129x            |
| <b>ROTIFERA</b>        |                                           |                                                                  |                                        |                 |
| 344                    | <i>Adineta vaga</i>                       | ?                                                                | ?                                      | ?               |
| <b>PLATYHELMINTHES</b> |                                           |                                                                  |                                        |                 |
| 345                    | <i>Schistosoma curassoni</i>              | ?                                                                | ?                                      | ?               |
| 346                    | <i>Schistosoma haematobium</i>            | SOAPdenovo v. 1.04                                               | Illumina HiSeq 2000                    | 74x             |
| 347                    | <i>Schistosoma japonicum</i>              | ?                                                                | ?                                      | ?               |
| 348                    | <i>Schistosoma mansoni</i>                | ?                                                                | ?                                      | ?               |
| 349                    | <i>Schistosoma margrebowiei</i>           | ?                                                                | ?                                      | ?               |
| 350                    | <i>Schistosoma mattheei</i>               | ?                                                                | ?                                      | ?               |
| 351                    | <i>Schistosoma rodhaini</i>               | ?                                                                | ?                                      | ?               |
| 352                    | <i>Clonorchis sinensis</i>                | Celera assembler v. 6.1                                          | Illumina                               | 72x             |
| 353                    | <i>Echinococcus granulosus</i>            | ?                                                                | ?                                      | ?               |
| 354                    | <i>Echinococcus<br/>multilocularis</i>    | ?                                                                | ?                                      | ?               |
| 355                    | <i>Hymenolepis microstoma</i>             | ?                                                                | ?                                      | ?               |
| <b>ANNELIDA</b>        |                                           |                                                                  |                                        |                 |
| 356                    | <i>Capitella teleta</i>                   | JGI Jazz Assembler v.<br>10/16/2006                              | Sanger                                 | 7.9x            |
| 357                    | <i>Helobdella robusta</i>                 | JGI Jazz v. 01/29/2007                                           | Sanger                                 | 7.92x           |

| No                   | Species                                           | Assembly Method                                  | Sequencing Technology                    | Genome Coverage            |
|----------------------|---------------------------------------------------|--------------------------------------------------|------------------------------------------|----------------------------|
| <b>MOLLUSCA</b>      |                                                   |                                                  |                                          |                            |
| 358                  | <i>Crassostrea gigas</i>                          | SOAPdenovo v. 1.05                               | Illumina HiSeq 2000                      | 100x                       |
| 359                  | <i>Lottia gigantea</i>                            | JGI Jazz v. 08/24/2006                           | Sanger                                   | 8.87x                      |
| 360                  | <i>Aplysia californica</i>                        | allpaths v. R40582                               | Illumina Hi-Seq                          | 66x                        |
| 361                  | <i>Biomphalaria glabrata</i>                      | Newbler v. July 2011                             | 454 FLX Titanium                         | 27.5x                      |
| <b>CNIDARIA</b>      |                                                   |                                                  |                                          |                            |
| 362                  | <i>Nematostella vectensis</i>                     | ?                                                | ?                                        | ?                          |
| 363                  | <i>Hydra vulgaris</i>                             | Ringer-Phrap                                     | ?                                        | around 4x per haplotype    |
| <b>TENTACULATA</b>   |                                                   |                                                  |                                          |                            |
| 364                  | <i>Mnemiopsis leidyi</i>                          | Phusion v. 1.02                                  | 454 GS-FLX Titanium; Illumina GA IIX     | 12x                        |
| <b>PLACOZOA</b>      |                                                   |                                                  |                                          |                            |
| 365                  | <i>Trichoplax adhaerens</i>                       | ?                                                | ?                                        | 8.06x                      |
| <b>PORIFERA</b>      |                                                   |                                                  |                                          |                            |
| 366                  | <i>Amphimedon queenslandica</i>                   | PHRAPATTACK v. Feb 2007                          | Sanger                                   | 8x                         |
| <b>VIRIDIPLANTAE</b> |                                                   |                                                  |                                          |                            |
| 367                  | <i>Micromonas pusilla</i><br><i>CCMP1545</i>      | ?                                                | ABI 3730                                 | 8x                         |
| 368                  | <i>Micromonas sp. RCC299</i>                      | ?                                                | ?                                        | ?                          |
| 369                  | <i>Ostreococcus lucimarinus</i><br><i>CCE9901</i> | ?                                                | ?                                        | ?                          |
| 370                  | <i>Ostreococcus tauri</i>                         | ?                                                | ?                                        | ?                          |
| 371                  | <i>Chlamydomonas reinhardtii</i>                  | ?                                                | ?                                        | 12.8x                      |
| 372                  | <i>Volvox carteri f. nagariensis</i>              | ?                                                | ?                                        | ?                          |
| 373                  | <i>Chlorella variabilis</i>                       | JAZZ v. May 25, 2007                             | Sanger                                   | 8.9x                       |
| 374                  | <i>Auxenochlorella protothecoides</i>             | Newbler v. 2.6; Amos v. 3.1; SOAP denovo v. 2.01 | 454 GS FLX Titanium; Illumina HiSeq 2000 | 145x                       |
| 375                  | <i>Helicosporidium sp. ATCC 50920</i>             | Ray v. 2.0.0-rc8                                 | Illumina HiSeq; Illumina GAIIx           | 62x                        |
| 376                  | <i>Coccomyxa subellipsoidea C-169</i>             | Arachne v. 20071016                              | Sanger                                   | 8.16x + targeted finishing |
| 377                  | <i>Klebsormidium flaccidum</i>                    | Newbler v. 2.6                                   | 454; Illumina GAIIx                      | 40x                        |
| 378                  | <i>Physcomitrella patens</i>                      | ?                                                | ?                                        | 8.1x                       |
| 379                  | <i>Selaginella moellendorffii</i>                 | Arachne v. 20070201                              | Sanger                                   | 7.0x                       |
| 380                  | <i>Pinus taeda</i>                                | SOAPdenovo v. 2                                  | Illumina GAIIx                           | Unknown                    |
| 381                  | <i>Amborella trichopoda</i>                       | Newbler v. 2.6 build version 20110517_1502       | 454                                      | 30x                        |
| 382                  | <i>Spirodela polyrhiza</i>                        | Newbler v. 2.6                                   | 454; ABI3730                             | 22.0x                      |
| 383                  | <i>Phoenix dactylifera</i>                        | Newbler v. 2.5.3; HAPS v. 0.1.200                | 454; SOLiD; ABI3730                      | 139.0x                     |
| 384                  | <i>Elaeis oleifera</i>                            | Newbler v. 2.6                                   | 454                                      | 16.0x                      |
| 385                  | <i>Ensete ventricosum</i>                         | SOAPdenovo v. 1.05                               | Illumina HiSeq                           | 40.0x                      |
| 386                  | <i>Musa acuminata subsp. malaccensis</i>          | ?                                                | ?                                        | ?                          |

| No  | Species                               | Assembly Method                   | Sequencing Technology                           | Genome Coverage                                                                |
|-----|---------------------------------------|-----------------------------------|-------------------------------------------------|--------------------------------------------------------------------------------|
| 387 | <i>Sorghum bicolor</i>                | ?                                 | Sanger                                          | 8x                                                                             |
| 388 | <i>Zea mays</i>                       | ?                                 | ?                                               | ?                                                                              |
| 389 | <i>Setaria italica</i>                | Arachne v. 2007101641HA           | Sanger                                          | 8.29x                                                                          |
| 390 | <i>Brachypodium distachyon</i>        | Arachne v. 200710164HA            | Sanger                                          | 9.43x                                                                          |
| 391 | <i>Leersia perrieri</i>               | AllPaths v. 44849                 | Illumina HiSeq                                  | 150.0x                                                                         |
| 392 | <i>Oryza barthii</i>                  | AllPaths v. 44849; Newbler v. 2.8 | Illumina GAIIx; 454                             | 110.0x                                                                         |
| 393 | <i>Oryza brachyantha</i>              | SOAPdenovo v. 1.04                | Illumina GA II                                  | 104x                                                                           |
| 394 | <i>Oryza glumipatula</i>              | AllPaths v. 44849                 | Illumina HiSeq                                  | 135.0x                                                                         |
| 395 | <i>Oryza longistaminata</i>           | SOAPdenovo v. 2.2                 | Illumina HiSeq                                  | 52.5x                                                                          |
| 396 | <i>Oryza meridionalis</i>             | ABYSS v. 1.3.6                    | Illumina HiSeq                                  | 166.0x                                                                         |
| 397 | <i>Oryza nivara</i>                   | AllPaths v. 44849                 | Illumina HiSeq                                  | 102.0x                                                                         |
| 398 | <i>Oryza punctata</i>                 | AllPaths v. 44849                 | Illumina HiSeq; 454                             | 130.0x                                                                         |
| 399 | <i>Oryza sativa Japonica Group</i>    | ?                                 | ?                                               | ?                                                                              |
| 400 | <i>Zizania latifolia</i>              | AllPaths v. allpathslg-45489      | Illumina HiSeq                                  | 140.0x                                                                         |
| 401 | <i>Aegilops tauschii</i>              | SOAPdenovo v. 1.05                | Illumina GA IIx; HiSeq2000                      | 90x                                                                            |
| 402 | <i>Triticum urartu</i>                | SOAPdenovo v. 1.05                | Illumina Hiseq2000                              | 90x                                                                            |
| 403 | <i>Nelumbo nucifera</i>               | AllPaths v. 40102                 | Illumina HiSeq; 454                             | 100.0x                                                                         |
| 404 | <i>Lupinus angustifolius</i>          | ?                                 | ?                                               | ?                                                                              |
| 405 | <i>Phaseolus vulgaris</i>             | ARACHNE v. 20071016_modified      | ABI 3730; Roche 454 FLX; Illumina GAI           | 21.02x                                                                         |
| 406 | <i>Cajanus cajan</i>                  | Newbler v. 2.5.3                  | 454 GS FLX phase D; 454 FLX Paired-end Titanium | 10x                                                                            |
| 407 | <i>Vigna angularis var. angularis</i> | ABYSS v. 1.3.5                    | Illumina HiSeq                                  | 65.0x                                                                          |
| 408 | <i>Vigna radiata var. radiata</i>     | Allpath-LG v. 42179               | Illumina HiSeq                                  | 300.0x                                                                         |
| 409 | <i>Glycine max</i>                    | Arachne v. 2007101641HA           | Sanger                                          | 8.02x                                                                          |
| 410 | <i>Glycine soja</i>                   | SOAPdenovo v. 2010                | Illumina GAI                                    | 63.1x                                                                          |
| 411 | <i>Cicer arietinum</i>                | SOAPdenovo v. 2.03                | Illumina Hiseq 2000                             | 120x                                                                           |
| 412 | <i>Medicago truncatula</i>            | ?                                 | ?                                               | ?                                                                              |
| 413 | <i>Trifolium pratense</i>             | ABYSS v. 1.3.3                    | Illumina HiSeq                                  | 58.0x                                                                          |
| 414 | <i>Lotus japonicus</i>                | ?                                 | ?                                               | ?                                                                              |
| 415 | <i>Malus x domestica</i>              | ?                                 | ?                                               | ?                                                                              |
| 416 | <i>Pyrus x bretschneideri</i>         | BAC to BAC v. unpublished         | Illumina HS2000                                 | 7.6x BAC; the average coverage depth of each BAC is 86x; additional 107.6x WGS |
| 417 | <i>Prunus mume</i>                    | SOAPdenovo v. 1.05                | Illumina Hiseq2000                              | 180x                                                                           |
| 418 | <i>Prunus persica</i>                 | ARACHNE v. 20071016_modified      | ABI 3739                                        | 8.47x                                                                          |
| 419 | <i>Fragaria iinumae</i>               | SOAPdenovo v. 1.05                | Illumina HiSeq1000                              | 321.3x                                                                         |
| 420 | <i>Fragaria nubicola</i>              | SOAPdenovo v. 1.05                | Illumina HiSeq1000                              | 351.5x                                                                         |

| No  | Species                                       | Assembly Method                                   | Sequencing Technology                           | Genome Coverage                                            |
|-----|-----------------------------------------------|---------------------------------------------------|-------------------------------------------------|------------------------------------------------------------|
| 421 | <i>Fragaria orientalis</i>                    | SOAPdenovo v. 1.05                                | Illumina HiSeq1000                              | 203.4x                                                     |
| 422 | <i>Fragaria vesca subsp. vesca</i>            | Celera Assembler (CA) v. 5.3                      | 454; Solexa                                     | 49x                                                        |
| 423 | <i>Fragaria x ananassa</i>                    | Newbler v. 2.7; SOAPdenovo v. 1.05                | 454 GS FLX+; Illumina GAIIX; Illumina HiSeq1000 | 402.6x                                                     |
| 424 | <i>Morus notabilis</i>                        | SOAPdenovo v. 1.05                                | Illumina HiSeq2000                              | 236x                                                       |
| 425 | <i>Cannabis sativa</i>                        | SOAPdenovo v. 1.0.5                               | Illumina GA II; HiSeq                           | 130x                                                       |
| 426 | <i>Castanea mollissima</i>                    | Newbler v. 2.8                                    | 454; Illumina                                   | 46.0x                                                      |
| 427 | <i>Betula nana</i>                            | ?                                                 | ?                                               | ?                                                          |
| 428 | <i>Cucumis melo</i>                           | ?                                                 | ?                                               | ?                                                          |
| 429 | <i>Cucumis sativus</i>                        | ?                                                 | ABI and Megabase; Solexa GA                     | about 72x (3.8x Sanger sequences; 68x Solexa GA sequences) |
| 430 | <i>Citrullus lanatus</i>                      | SOAPdenovo v. 1.05                                | Illumina GA; Illumina HiSeq                     | 108.6x                                                     |
| 431 | <i>Lagenaria siceraria</i>                    | SOAPdenovo v. 2.01                                | Illumina HiSeq                                  | 8.9x                                                       |
| 432 | <i>Populus euphratica</i>                     | BAC by BAC v. Oct-2011                            | Illumina Hiseq2000                              | 115x (4.4x fosmid+111x WGS)                                |
| 433 | <i>Populus trichocarpa</i>                    | ARACHNE v. 2007101641HA                           | ABI 3739                                        | 7.45X                                                      |
| 434 | <i>Jatropha curcas</i>                        | SOAPdenovo v. 1.0.4                               | Illumina GAI; Illumina HS                       | 189x                                                       |
| 435 | <i>Manihot esculenta subsp. flabellifolia</i> | SOAPdenovo v. 1.05; Newbler v. 2.5.3; GATE v. 1.0 | Illumina GAI; Illumina HiSeq; 454               | 103.0x                                                     |
| 436 | <i>Ricinus communis</i>                       | ?                                                 | ?                                               | 4.5x                                                       |
| 437 | <i>Linum usitatissimum</i>                    | SoapDeNovo v. 01-Sep-2009                         | Illumina GA                                     | 94x                                                        |
| 438 | <i>Eucalyptus camaldulensis</i>               | WGS v. 6.0                                        | 454 GS FLX; ABI 3730xl                          | 4.2x                                                       |
| 439 | <i>Eucalyptus grandis</i>                     | ARACHNE v. 20071016_HA                            | ABI 3739                                        | 6.73x                                                      |
| 440 | <i>Carica papaya</i>                          | ?                                                 | ?                                               | 3x                                                         |
| 441 | <i>Arabidopsis halleri subsp. gemmifera</i>   | SOAPdenovo v. 1.05                                | Illumina HiSeq2000                              | 167.9x                                                     |
| 442 | <i>Arabidopsis lyrata subsp. lyrata</i>       | Arachne v. before 2009                            | Sanger                                          | 8x                                                         |
| 443 | <i>Arabidopsis thaliana</i>                   | BAC by BAC                                        | BAC physical map then Sanger sequencing of BACs | ?                                                          |
| 444 | <i>Camelina sativa</i>                        | SOAPdenovo v. 2.01                                | Illumina HiSeq; 454                             | 100.0x                                                     |
| 445 | <i>Capsella rubella</i>                       | ARACHNE v. 20071016_modified                      | ABI 3739; Roche 454FLX                          | 22.35x                                                     |
| 446 | <i>Brassica napus</i>                         | SOAPdenovo v. 2.01                                | Illumina Hiseq2000                              | 150x                                                       |
| 447 | <i>Brassica oleracea var. oleracea</i>        | SOAPdenovo v. 1.05                                | Illumina GAI; Illumina HiSeq; 454               | 94.0x                                                      |
| 448 | <i>Brassica rapa</i>                          | SOAPdenovo v. 1.04                                | Illumina GA                                     | 72x                                                        |

| No  | Species                                                    | Assembly Method                                                                   | Sequencing Technology                      | Genome Coverage                                               |
|-----|------------------------------------------------------------|-----------------------------------------------------------------------------------|--------------------------------------------|---------------------------------------------------------------|
| 449 | <i>Raphanus raphanistrum</i><br><i>subsp. raphanistrum</i> | ABYSS v. 1.2.5; Newbler v. 2.5.3; Celera Assembler v. 6.1; Minimus2/AMOS v. 3.1.0 | Illumina GAI; 454                          | 47.0x                                                         |
| 450 | <i>Raphanus sativus</i>                                    | Newbler v. 2.6; SMRTAnalysis v. 1.3.1                                             | 454; PacBio; Illumina HiSeq; ABI3730       | 267.0x                                                        |
| 451 | <i>Aethionema arabicum</i>                                 | Ray v. 1.7; SoapDeNovo v. 1.05                                                    | Illumina                                   | 60x                                                           |
| 452 | <i>Arabis alpina</i>                                       | Newbler v. 2.9; SSPACE v. 1.2; BAMBUS v. 2.33                                     | 454; Illumina GAIx; Sanger                 | 140.0x                                                        |
| 453 | <i>Eutrema parvulum</i>                                    | Newbler v. 2.5; ABYSS v. 1.2.1; minimus2                                          | 454 GS FLX Titanium; Illumina GA II        | 6x                                                            |
| 454 | <i>Eutrema salsugineum</i>                                 | ARACHNE v. 20071016_modified                                                      | ABI 3730                                   | 7.78x                                                         |
| 455 | <i>Sisymbrium irio</i>                                     | Ray v. 1.7; SoapDeNovo v. 1.05                                                    | Illumina                                   | 60x                                                           |
| 456 | <i>Leavenworthia alabamica</i>                             | Ray v. 1.7; SoapDeNovo v. 1.05                                                    | Illumina                                   | 60x                                                           |
| 457 | <i>Tarenaya hassleriana</i>                                | SOAPdenovo v. 2.2                                                                 | Illumina Hiseq                             | 139x                                                          |
| 458 | <i>Gossypium arboreum</i>                                  | ARACHNE v. 20071016_modified                                                      | ABI3730                                    | 19.7x                                                         |
| 459 | <i>Gossypium raimondii</i>                                 | ARACHNE v. 20071016_modified                                                      | ABI3730                                    | 19.7x                                                         |
| 460 | <i>Theobroma cacao</i>                                     | Jeremy Schmutz v. 2011-08-01                                                      | 454; Illumina; Sanger                      | 15.58x                                                        |
| 461 | <i>Aquilaria agallochum</i>                                | String Graph Assembler v. 0.10.10                                                 | Illumina HiSeq                             | 196.0x                                                        |
| 462 | <i>Azadirachta indica</i>                                  | Velvet v. 1.2.07; MIRA v. 3.4.0.2; cd-hit-est v. 4.5.4                            | Illumina HiSeq                             | 21.0x nuclear;<br>196.0x chloroplast;<br>587.0x mitochondrion |
| 463 | <i>Citrus clementine</i>                                   | ARACHNE v. 2007101641HA                                                           | ABI 3739                                   | 6.96x                                                         |
| 464 | <i>Citrus sinensis</i>                                     | SOAPdenovo v. April 2011                                                          | Illumina                                   | 214.0x                                                        |
| 465 | <i>Vitis vinifera</i>                                      | ?                                                                                 | Sanger                                     | 12x                                                           |
| 466 | <i>Amaranthus hypochondriacus</i>                          | SOAPdenovo v. 1.05                                                                | Illumina GAIx                              | 105.0x                                                        |
| 467 | <i>Amaranthus tuberculatus</i>                             | ?                                                                                 | 454                                        | 6x                                                            |
| 468 | <i>Beta vulgaris subsp. vulgaris</i>                       | Newbler v. 2.6                                                                    | 454; Illumina GAIx; Illumina HiSeq; Sanger | 30.0x                                                         |
| 469 | <i>Spinacia oleracea</i>                                   | SOAPdenovo v. 1.05                                                                | Illumina HiSeq                             | 60.1x                                                         |
| 470 | <i>Dianthus caryophyllus</i>                               | SOAPdenovo v. 1.05                                                                | 454 GS FLX+; Illumina HiSeq1000            | 604x                                                          |
| 471 | <i>Actinidia chinensis</i>                                 | AllPaths v. LG                                                                    | Illumina                                   | 150.0x                                                        |
| 472 | <i>Vaccinium macrocarpon</i>                               | CLC NGS Cell v. CLC Genomic Workbench v6.5.1                                      | Illumina GAIx                              | 20.0x                                                         |

| No                   | Species                              | Assembly Method                                                                                   | Sequencing Technology                  | Genome Coverage                      |
|----------------------|--------------------------------------|---------------------------------------------------------------------------------------------------|----------------------------------------|--------------------------------------|
| 473                  | <i>Diospyros lotus</i>               | Price v. Beta; cap3 v. December-2013                                                              | Illumina HiSeq                         | 23.0x                                |
| 474                  | <i>Primula veris</i>                 | AllPaths v. 48579                                                                                 | Illumina HiSeq; Illumina MiSeq; PacBio | 116.0x                               |
| 475                  | <i>Solanum arcanum</i>               | ?                                                                                                 | ?                                      | ?                                    |
| 476                  | <i>Solanum habrochaites</i>          | ?                                                                                                 | ?                                      | ?                                    |
| 477                  | <i>Solanum lycopersicum</i>          | Newbler v. 2.3-PostRelease-01/11/2010                                                             | 454; Sanger; Illumina; SOLiD           | 27x                                  |
| 478                  | <i>Solanum melongena</i>             | Newbler v. 2.7; SOAPdenovo v. 1.05; PCAP.rep                                                      | 454 GS FLX+; Illumina HiSeq2000        | 112x                                 |
| 479                  | <i>Solanum pennellii</i>             | ?                                                                                                 | ?                                      | ?                                    |
| 480                  | <i>Solanum pimpinellifolium</i>      | ABYSS v. 1.1.2                                                                                    | Illumina                               | 20x                                  |
| 481                  | <i>Solanum tuberosum</i>             | SOAPdenovo v. 1014                                                                                | Illumina GA2                           | 114x                                 |
| 482                  | <i>Capsicum annuum</i>               | SOAPdenovo v. 1.5; SSPACE v. 1.0                                                                  | Illumina HiSeq; Illumina GAI           | 186.6x                               |
| 483                  | <i>Nicotiana glauca</i>              | SOAPdenovo v. 1.05                                                                                | Illumina HiSeq                         | 94.0x                                |
| 484                  | <i>Nicotiana tomentosiformis</i>     | SOAPdenovo v. 1.05                                                                                | Illumina HiSeq                         | 146.0x                               |
| 485                  | <i>Fraxinus excelsior</i>            | ?                                                                                                 | ?                                      | ?                                    |
| 486                  | <i>Penstemon centranthifolius</i>    | Newbler v. 2.8                                                                                    | 454                                    | 0.005x                               |
| 487                  | <i>Penstemon grinnellii</i>          | Newbler v. 2.8                                                                                    | 454                                    | 0.005x                               |
| 488                  | <i>Sesamum indicum</i>               | SOAPdenovo v. 1.06                                                                                | Illumina Hiseq 2000                    | 152.7x                               |
| 489                  | <i>Genlisea aurea</i>                | CLC Genomics Workbench v. 5.5                                                                     | Illumina HiSeq                         | 300.0x                               |
| 490                  | <i>Mimulus guttatus</i>              | ARACHNE v. 2007101641HA                                                                           | ABI3730                                | 6.43x                                |
| 491                  | <i>Conyza canadensis</i>             | Newbler v. 2.6; SOAPdenovo v. 1; CLC NGS Cell v. Mar-2013                                         | 454; Illumina HiSeq; PacBio            | 350.0x                               |
| <b>ECHINOIDEA</b>    |                                      |                                                                                                   |                                        |                                      |
| 492                  | <i>Lytechinus variegatus</i>         | CABOG; Newbler; ATLAS-Link and ATLAS-GapFill                                                      | 454; Illumina                          | 13x 454; 21x Illumina                |
| 493                  | <i>Strongylocentrotus purpuratus</i> | Atlas v. WGS for Sanger Assembly, Atlas-Link and Atlas-GapFill for SOLiD and Illumina improvement | Sanger; SOLiD; Illumina                | 8.3x Sanger; 18x SOLiD; 40x Illumina |
| <b>ASTEROIDEA</b>    |                                      |                                                                                                   |                                        |                                      |
| 494                  | <i>Patiria miniata</i>               | CABOG v. 6.1; Newbler v. 2.3; ATLAS-LINK v. 1.0; ATLAS-GAPFILL v. 2.0                             | 454; Illumina                          | 15.0x 454; 70x Illumina              |
| <b>ENTEROPNEUSTA</b> |                                      |                                                                                                   |                                        |                                      |
| 495                  | <i>Saccoglossus kowalevskii</i>      | ?                                                                                                 | ABI                                    | 7.0x                                 |
| <b>TUNICATA</b>      |                                      |                                                                                                   |                                        |                                      |
| 496                  | <i>Ciona intestinalis</i>            | ?                                                                                                 | ?                                      | ?                                    |
| 497                  | <i>Ciona savignyi</i>                | ?                                                                                                 | ?                                      | ?                                    |

| No                        | Species                          | Assembly Method                              | Sequencing Technology | Genome Coverage |
|---------------------------|----------------------------------|----------------------------------------------|-----------------------|-----------------|
| 498                       | <i>Botryllus schlosseri</i>      | Celera Assembler v. 7.0;<br>Velvet v. 1.2.03 | Illumina HiSeq        | 400.0x          |
| 499                       | <i>Oikopleura dioica</i>         | ?                                            | ?                     | ?               |
| <b>LEPTOCARDII</b>        |                                  |                                              |                       |                 |
| 500                       | <i>Branchiostoma floridae</i>    | ?                                            | ?                     | ?               |
| <b>CEPHALASPIDOMORPHI</b> |                                  |                                              |                       |                 |
| 501                       | <i>Lethenteron camtschaticum</i> | Newbler v. 2.7                               | 454                   | 20.0x           |
| 502                       | <i>Petromyzon marinus</i>        | Arachne v. 3.2                               | ABI 3730              | 5.0x            |
| <b>SARCOPTERYGII</b>      |                                  |                                              |                       |                 |
| 503                       | <i>Latimeria chalumnae</i>       | AllPaths v. R36819                           | Illumina HiSeq        | 77.5x           |

## 2.1.4 Figure 2: Pipeline for L1 sequence retrieval from full genome data

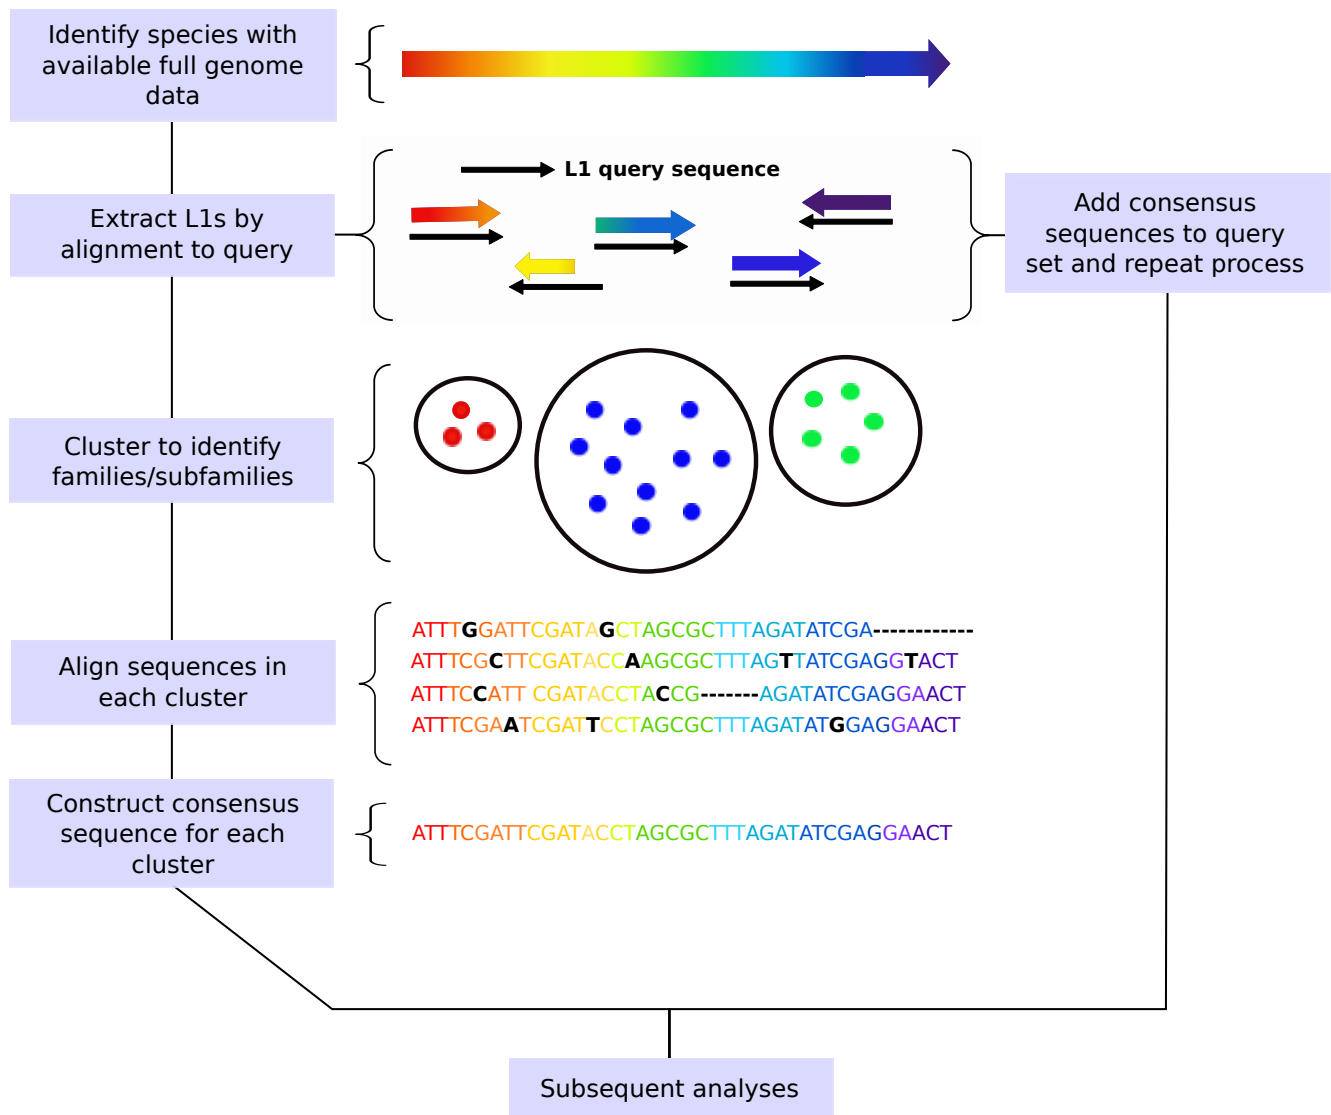

Figure 2: **L1 extraction pipeline:** Consists of an iterative query-driven method based on sequence similarity. Query L1 sequences from different species are concatenated into one file. This is used to extract similar sequences from each of the 503 genomes. For each species, the L1 hits are clustered and then aligned to generate a consensus sequence for each cluster (subfamily). These consensus sequences are then added to the query file and the process is repeated. This pipeline was initially repeated three times; then, the independent TBLASTN approach was used to generate species-specific queries; then, this pipeline was repeated a final two times: first with the species-specific queries and then with all individual L1s (more than 3 million sequences) .



## 2.2 Identification of putatively active L1 elements

### 2.2.1 Figure 3: Categorisation of L1 elements based on open reading frames (ORFs)

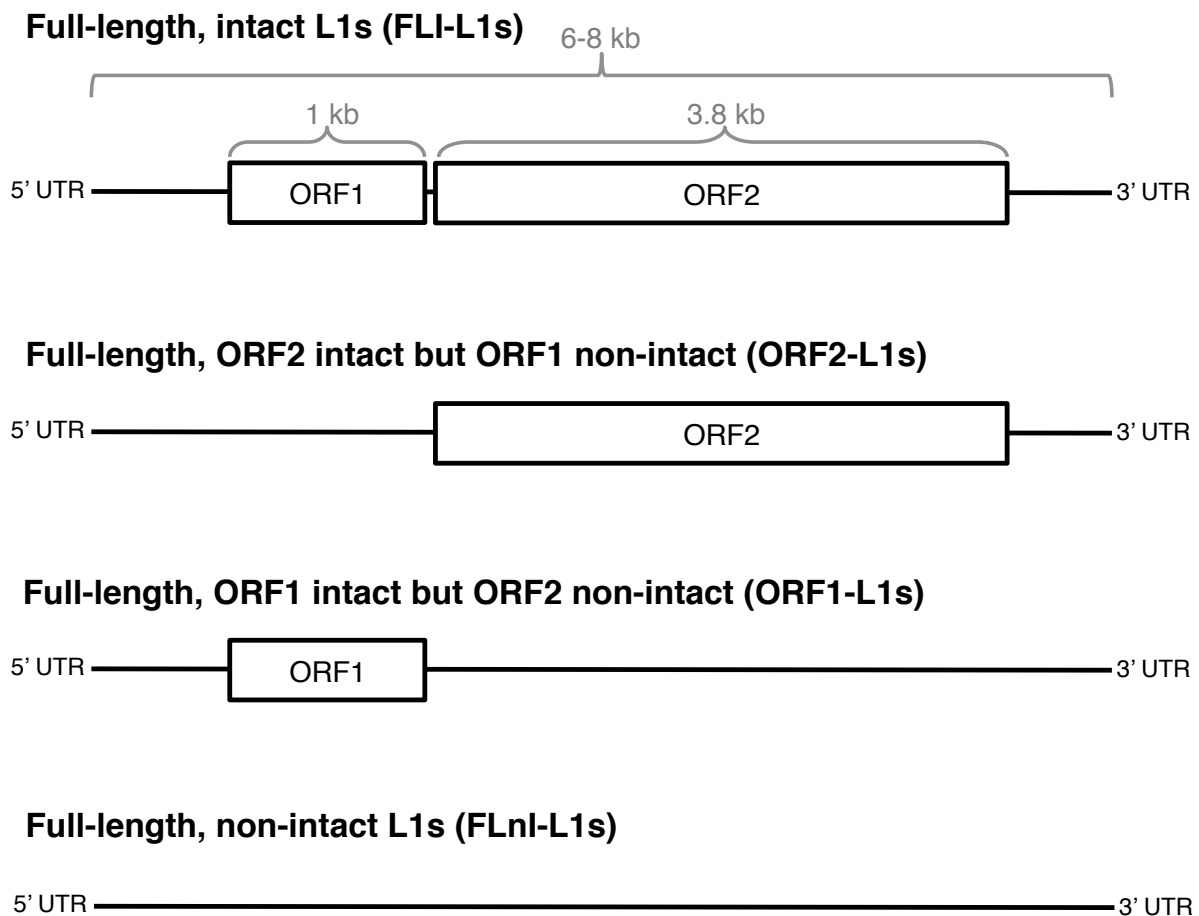

Figure 3: **Types of L1s:** L1s can be separated into four groups based on the state of their open reading frames, as shown above. An L1 is defined as an 'active' candidate if it is intact in the ORF responsible for reverse transcription, ORF2 (so FLI-L1s and ORF2-L1s are considered active, while ORF1-L1s and FLnI-L1s are not).

### 2.2.2 Figure 4: Requirements for determining whether an open reading frame is intact

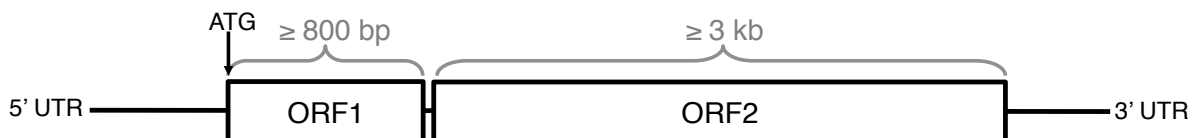

Figure 4: **Intact ORFs:** An ORF is considered intact if it is at least 80% of the expected length, with a start codon, stop codon, and no debilitating mutations in between (e.g. premature stop codons, large stretches of ambiguous nucleotides). ORF1 has the additional requirement of starting with a methionine start codon (ATG). L1 sequences were extended by 1kb either side during identification of the ORFs, in case the ORF start/stop codons were outside of the extracted L1 sequence. ORF1 and ORF2 were also confirmed by alignment and tested for similarity to known domains, as described in the main text.

## 3 Results

### 3.1 Ubiquity of L1 across the eukaryotic tree of life

#### 3.1.1 Table 4: L1s in nucleotide nr/htgs databases, found using TBLASTN

Table 4: **TBLASTN results:** Shows the results for the top hit found in each species. TBLASTN search parameters were default except the e-value was changed to 1e-5. Input was the concatenated ORF1p and ORF2p from 13 full-length L1 elements from Repbase: L1HS (*Homo sapiens*, Hs), TX1 (*Xenopus laevis*, Xl), L1-1.Acar (*Anolis carolinensis*, Ac), L1-3.Dr (*Danio rerio*, Dr), Ag-L1.5 (*Anopheles gambiae*, Ag), L1-1.HM (*Hydra vulgaris*, Hv), ATLINE1 (*Arabidopsis thaliana*, At), Zepp (*Chlorella vulgaris*, Cv), Tx1-3.Spur (*Strongylocentrotus purpuratus*, Sp), Tx1-12.SK (*Saccoglossus kowalevskii*, Sk), L1-1a.Cis (*Ciona savignyi*, Cs), Tx1-1.BF (*Branchiostoma floridae*, Bf), L1-3.LCh (*Latimeria chalumnae*, Lc). These queries span all (available) orders/clades, and consist of both the typical mammalian L1 group and diverse Tx1 group. Databases searched were the NCBI non-redundant nucleotide collection (nr) and high throughput genomic sequences (htgs). The table below shows the number of hits that were produced from each query and the statistics for the top hit. bitscore = max score; qcovs = query coverage; evalue = e-value; pident = percentage identity; qstart = start coordinate of the hit on the query sequence; qend = query end coordinate (this is important because true hits are more likely to overlap the reverse-transcriptase domain in ORF2, which is thought to be the most conserved and vital for retrotransposition).

| No              | Species and taxon identifier                    | # hits from each query (top hit red)                                                                                 | Top hit  |       |        |        |        |      |
|-----------------|-------------------------------------------------|----------------------------------------------------------------------------------------------------------------------|----------|-------|--------|--------|--------|------|
|                 |                                                 |                                                                                                                      | bitscore | qcovs | evalue | pident | qstart | qend |
| <b>MAMMALIA</b> |                                                 |                                                                                                                      |          |       |        |        |        |      |
| 1               | <i>Tachyglossus aculeatus</i><br>(taxid:9261)   | 44 Lc, 25 Cv, 22 Ag, 18 Sp, 14 Hs, 13 At, 12 Ac, 9 Cs, 3 Bf, 1 Sk, 1 Xl, 1 Hv                                        | 102      | 19    | 1e-21  | 28.40  | 852    | 1171 |
| 2               | <i>Ornithorhynchus anatinus</i><br>(taxid:9258) | 403 Lc, 229 Cv, 221 Hs, 191 Ag, 150 Ac, 135 Cs, 129 Sp, 114 At, 6 Bf, 2 Sk, 2 Dr, 2 Hv                               | 110      | 20    | 4e-23  | 28.49  | 838    | 1174 |
| 3               | <i>Monodelphis domestica</i><br>(taxid:13616)   | 14806 Hs, 4866 Ac, 4658 Lc, 2448 Dr, 2251 Hv, 2240 Bf, 2050 Sp, 2031 Xl, 1917 Cs, 1910 Sk, 1486 At, 1321 Cv, 1214 Ag | 1425     | 91    | 0.0    | 53.28  | 339    | 1602 |
| 4               | <i>Macropus eugenii</i><br>(taxid:9315)         | 4346 Hs, 767 Ac, 633 Lc, 295 Dr, 288 Sp, 226 Hv, 196 Bf, 184 Cs, 160 Xl, 159 Sk, 158 At, 118 Cv, 91 Ag               | 1442     | 90    | 0.0    | 53.25  | 342    | 1602 |
| 5               | <i>Sarcophilus harrisii</i><br>(taxid:9305)     | 775 Hs, 227 Ac, 166 Lc, 65 Dr, 37 At, 36 Cs, 34 Sk, 33 Xl, 32 Sp, 32 Bf, 23 Hv, 20 Cv, 15 Ag                         | 1059     | 91    | 0.0    | 56.62  | 341    | 1239 |
| 6               | <i>Dasypus novemcinctus</i><br>(taxid:9361)     | 15995 Hs, 3588 Lc, 2319 Ac, 936 Hv, 910 Sp, 899 Dr, 814 Bf, 783 Xl, 769 Sk, 679 Cs, 630 At, 453 Ag, 362 Cv           | 1932     | 100   | 0.0    | 57.31  | 1      | 1610 |

| No | Species and taxon identifier                            | # hits from each query (top hit red)                                                                                | Top hit  |       |        |        |        |      |
|----|---------------------------------------------------------|---------------------------------------------------------------------------------------------------------------------|----------|-------|--------|--------|--------|------|
|    |                                                         |                                                                                                                     | bitscore | qcovs | evalue | pident | qstart | qend |
| 7  | <i>Choloepus hoffmanni</i><br>(taxid:9358)              | 10120 Hs, 2477 Lc, 1766 Ac, 985 Hv, 971 Dr, 941 Sk, 893 Bf, 835 Xl, 797 Sp, 797 Cs, 732 At, 647 Ag, 515 Cv          | 1941     | 99    | 0.0    | 57.76  | 4      | 1610 |
| 8  | <i>Chrysochloris asiatica</i><br>(taxid:185453)         | 9 Hs, 7 Lc                                                                                                          | 154      | 6     | 2e-42  | 66.67  | 1141   | 1239 |
| 9  | <i>Echinops telfairi</i><br>(taxid:9371)                | 2590 Hs, 463 Lc, 362 Ac, 186 Sp, 152 Dr, 141 Bf, 125 Hv, 116 Xl, 114 At, 111 Sk, 111 Cs, 80 Ag, 49 Cv               | 1801     | 96    | 0.0    | 53.01  | 54     | 1609 |
| 10 | <i>Orycteropus afer</i><br>(taxid:1230840)              | 1 Hs                                                                                                                | 60.5     | 2     | 5e-09  | 63.41  | 969    | 1009 |
| 11 | <i>Elephantulus edwardii</i><br>(taxid:28737)           | 7 Hs, 5 Lc                                                                                                          | 138      | 6     | 7e-37  | 61.22  | 1142   | 1239 |
| 12 | <i>Trichechus manatus latirostris</i><br>(taxid:127582) | 5 Hs                                                                                                                | 73.6     | 4     | 5e-13  | 60.61  | 1195   | 1260 |
| 13 | <i>Procavia capensis</i><br>(taxid:9813)                | 10631 Hs, 2836 Lc, 2326 Ac, 1110 Dr, 1085 Sp, 1053 Hv, 1031 Xl, 987 Bf, 962 Sk, 922 Cs, 801 At, 671 Ag, 426 Cv      | 1660     | 94    | 0.0    | 59.86  | 324    | 1604 |
| 14 | <i>Loxodonta africana</i><br>(taxid:9785)               | 13775 Hs, 5002 Lc, 3725 Ac, 2985 Dr, 2783 Sp, 2550 Xl, 2350 Hv, 2161 Cs, 2079 Bf, 1857 Sk, 1749 At, 1434 Ag, 803 Cv | 1696     | 98    | 0.0    | 62.29  | 339    | 1610 |
| 15 | <i>Erinaceus europaeus</i><br>(taxid:9365)              | 41 Hs, 7 Ac, 4 Lc, 3 Sp, 3 Bf, 3 Sk, 3 Dr, 3 Cs, 2 Cv, 2 Xl, 2 Hv, 2 Ag, 2 At                                       | 687      | 65    | 0.0    | 58.48  | 1056   | 1609 |
| 16 | <i>Sorex araneus</i><br>(taxid:42254)                   | 4496 Hs, 908 Ac, 801 Lc, 377 Dr, 370 Cs, 329 Bf, 328 Sp, 319 Hv, 308 Xl, 275 At, 272 Sk, 248 Ag, 226 Cv             | 1879     | 99    | 0.0    | 56.59  | 11     | 1612 |
| 17 | <i>Condylura cristata</i><br>(taxid:143302)             | 92 Hs, 8 Lc                                                                                                         | 111      | 12    | 3e-24  | 38.91  | 1291   | 1495 |
| 18 | <i>Pteropus alecto</i><br>(taxid:9402)                  | 207 Hs, 2 Lc, 1 Ac                                                                                                  | 172      | 24    | 9e-44  | 33.33  | 1136   | 1523 |
| 19 | <i>Pteropus vampyrus</i><br>(taxid:132908)              | 4953 Hs, 585 Lc, 526 Ac, 203 Hv, 201 Bf, 182 Dr, 170 Sk, 168 Sp, 160 Cs, 153 Xl, 137 At, 77 Ag, 65 Cv               | 804      | 99    | 0.0    | 52.99  | 837    | 1612 |

| No | Species and taxon identifier                            | # hits from each query (top hit red)                                                                       | Top hit  |       |        |        |        |      |
|----|---------------------------------------------------------|------------------------------------------------------------------------------------------------------------|----------|-------|--------|--------|--------|------|
|    |                                                         |                                                                                                            | bitscore | qcovs | evalue | pident | qstart | qend |
| 20 | <i>Eidolon helvum</i><br>(taxid:77214)                  | 2 Hs                                                                                                       | 62.0     | 5     | 1e-12  | 40.40  | 1401   | 1495 |
| 21 | <i>Megaderma lyra</i><br>(taxid:9413)                   | No significant similarity found                                                                            |          |       |        |        |        |      |
| 22 | <i>Rhinolophus ferrumequinum</i><br>(taxid:59479)       | 8716 Hs, 1304 Lc, 1156 Ac, 470 Dr, 448 Bf, 434 Hv, 430 Xl, 422 Sk, 396 Sp, 367 Cs, 339 At, 281 Ag, 252 Cv  | 1808     | 98    | 0.0    | 67.51  | 345    | 1612 |
| 23 | <i>Pteronotus parnellii</i><br>(taxid:59476)            | No significant similarity found                                                                            |          |       |        |        |        |      |
| 24 | <i>Eptesicus fuscus</i><br>(taxid:29078)                | 3 Hs, 1 Lc                                                                                                 | 144      | 13    | 8e-35  | 40.67  | 112    | 319  |
| 25 | <i>Myotis brandtii</i><br>(taxid:109478)                | 173 Hs, 1 Lc, 1 Dr, 1 At                                                                                   | 147      | 18    | 5e-35  | 35.89  | 36     | 318  |
| 26 | <i>Myotis davidii</i><br>(taxid:225400)                 | 122 Hs, 1 Lc                                                                                               | 145      | 17    | 9e-35  | 35.92  | 36     | 318  |
| 27 | <i>Myotis lucifugus</i><br>(taxid:59463)                | 4484 Hs, 693 Lc, 627 Ac, 184 Dr, 182 Hv, 181 Sk, 177 Sp, 161 Xl, 153 Bf, 146 Cs, 138 At, 121 Ag, 97 Cv     | 1975     | 92    | 0.0    | 63.00  | 113    | 1612 |
| 28 | <i>Ceratotherium simum simum</i><br>(taxid:73337)       | 72 Hs                                                                                                      | 103      | 5     | 9e-25  | 55.17  | 1201   | 1287 |
| 29 | <i>Equus przewalskii</i><br>(taxid:9798)                | 733 Hs, 14 Lc, 12 Ac, 3 Cv, 3 Sp, 3 Bf, 3 Sk, 3 Cs, 3 At, 2 Dr, 2 Hv, 1 Xl, 1 Ag                           | 465      | 39    | 0.0    | 67.61  | 970    | 1287 |
| 30 | <i>Equus caballus</i><br>(Thoroughbred)<br>(taxid:9796) | 8022 Hs, 1583 Lc, 1570 Ac, 559 Dr, 509 Sp, 499 Bf, 490 Hv, 471 Sk, 458 Cs, 446 Xl, 376 At, 267 Ag, 237 Cv  | 1932     | 98    | 0.0    | 58.40  | 18     | 1613 |
| 31 | <i>Equus caballus</i><br>(Mongolian)<br>(taxid:9796)    | As above (same taxid)                                                                                      | "        | "     | "      | "      | "      | "    |
| 32 | <i>Manis pentadactyla</i><br>(taxid:143292)             | No significant similarity found                                                                            |          |       |        |        |        |      |
| 33 | <i>Felis catus</i><br>(taxid:9685)                      | 13549 Hs, 2551 Lc, 2138 Ac, 798 Sp, 783 Dr, 774 Hv, 723 Sk, 718 Bf, 691 Xl, 621 Cs, 532 At, 419 Ag, 377 Cv | 1897     | 91    | 0.0    | 61.96  | 139    | 1613 |
| 34 | <i>Panthera tigris altaica</i><br>(taxid:74533)         | 116 Hs, 1 Lc                                                                                               | 155      | 18    | 1e-37  | 36.15  | 22     | 312  |

| No | Species and taxon identifier                                    | # hits from each query (top hit red)                                                                                 | Top hit  |       |        |        |        |      |
|----|-----------------------------------------------------------------|----------------------------------------------------------------------------------------------------------------------|----------|-------|--------|--------|--------|------|
|    |                                                                 |                                                                                                                      | bitscore | qcovs | evalue | pident | qstart | qend |
| 35 | <i>Canis lupus familiaris</i><br>(taxid:9615)                   | 25106 Hs, 6695 Lc, 5932 Ac, 2726 Dr, 2352 Xl, 2327 Sk, 2258 Hv, 2248 Cs, 2183 Sp, 2011 Bf, 1732 At, 1535 Ag, 1386 Cv | 1900     | 93    | 0.0    | 60.53  | 112    | 1612 |
| 36 | <i>Ursus maritimus</i><br>(taxid:29073)                         | 339 Hs, 4 Lc, 1 Ac                                                                                                   | 152      | 24    | 3e-57  | 35.88  | 1296   | 1584 |
| 37 | <i>Ailuropoda melanoleuca</i><br>(taxid:9646)                   | 610 Hs, 17 Lc, 13 Ac, 4 Hv, 3 Bf, 3 Dr, 2 Cv, 2 Sp, 2 Sk, 2 Xl, 2 Cs, 2 Ag, 2 At                                     | 853      | 73    | 0.0    | 52.33  | 142    | 963  |
| 38 | <i>Leptonychotes weddellii</i><br>(taxid:9713)                  | 20 Hs, 1 Lc                                                                                                          | 148      | 18    | 2e-36  | 36.72  | 22     | 321  |
| 39 | <i>Odobenus rosmarus divergens</i><br>(taxid:9708)              | 11 Hs, 2 Lc                                                                                                          | 149      | 19    | 6e-36  | 36.14  | 6      | 321  |
| 40 | <i>Mustela putorius furo</i> (taxid:9669)                       | 4945 Hs, 918 Lc, 797 Ac, 381 Dr, 316 Xl, 312 Hv, 291 Bf, 290 Cs, 283 Sk, 268 Sp, 219 Ag, 219 At, 195 Cv              | 1805     | 94    | 0.0    | 66.33  | 343    | 1613 |
| 41 | <i>Camelus dromedarius</i><br>(taxid:9838)                      | 77 Hs                                                                                                                | 117      | 5     | 2e-29  | 65.85  | 1531   | 1612 |
| 42 | <i>Camelus ferus</i><br>(taxid:419612)                          | 69 Hs, 1 Lc                                                                                                          | 94.0     | 9     | 1e-18  | 35.15  | 1415   | 1570 |
| 43 | <i>Vicugna pacos</i><br>(taxid:30538)                           | 5666 Hs, 592 Ac, 588 Lc, 166 Dr, 161 Hv, 148 Sp, 131 Bf, 131 Xl, 122 Cs, 111 Sk, 99 At, 79 Ag, 64 Cv                 | 1766     | 92    | 0.0    | 64.54  | 327    | 1612 |
| 44 | <i>Sus scrofa</i> (Duroc)<br>(taxid:9823)                       | 21633 Hs, 5697 Lc, 4748 Ac, 2334 Dr, 2209 Sp, 2040 Hv, 1987 Xl, 1938 Bf, 1900 Cs, 1823 Sk, 1711 At, 1382 Ag, 1152 Cv | 1837     | 97    | 0.0    | 67.87  | 343    | 1612 |
| 45 | <i>Sus scrofa</i> (Tibetan)<br>(taxid:9823)                     | As above (same taxid)                                                                                                | "        | "     | "      | "      | "      | "    |
| 46 | <i>Sus scrofa</i> (Ellegaard Gottingen minipig)<br>(taxid:9823) | As above (same taxid)                                                                                                | "        | "     | "      | "      | "      | "    |
| 47 | <i>Balaenoptera acutorostrata scammoni</i><br>(taxid:310752)    | 180 Hs, 5 Lc, 2 Ac                                                                                                   | 133      | 6     | 8e-31  | 60.38  | 1474   | 1577 |
| 48 | <i>Physeter catodon</i><br>(taxid:9755)                         | 145 Hs, 11 Lc, 11 Ac, 1 Cs                                                                                           | 281      | 11    | 2e-85  | 68.06  | 1044   | 1234 |

| No | Species and taxon identifier                       | # hits from each query (top hit red)                                                                                 | Top hit  |       |        |        |        |      |
|----|----------------------------------------------------|----------------------------------------------------------------------------------------------------------------------|----------|-------|--------|--------|--------|------|
|    |                                                    |                                                                                                                      | bitscore | qcovs | evalue | pident | qstart | qend |
| 49 | <i>Lipotes vexillifer</i><br>(taxid:118797)        | 9 Hs, 1 Sp, 1 Lc, 1 Ac                                                                                               | 194      | 18    | 2e-53  | 55.00  | 856    | 1048 |
| 50 | <i>Tursiops truncatus</i><br>(taxid:9739)          | 18 Hs                                                                                                                | 132      | 5     | 1e-31  | 65.22  | 1408   | 1499 |
| 51 | <i>Orcinus orca</i><br>(taxid:9733)                | 17 Hs                                                                                                                | 136      | 14    | 3e-40  | 47.50  | 1328   | 1482 |
| 52 | <i>Pantholops hodgsonii</i><br>(taxid:59538)       | 59 Hs, 1 Lc, 1 Cs, 1 Ac                                                                                              | 498      | 22    | 2e-156 | 63.23  | 1255   | 1613 |
| 53 | <i>Capra hircus</i><br>(taxid:9925)                | 228 Hs, 23 Sp, 20 Lc, 16 Ac, 12 Bf, 9 Cs, 8 Xl, 8 Hv, 6 Dr, 4 Sk, 3 Ag, 3 At, 2 Cv                                   | 534      | 92    | 0.0    | 59.44  | 1184   | 1612 |
| 54 | <i>Ovis aries</i> (Texel)<br>(taxid:9940)          | 2033 Hs, 354 Sp, 339 Ac, 284 Lc, 256 Bf, 230 Cs, 215 Dr, 135 Xl, 115 Hv, 69 Sk, 61 Ag, 52 At, 16 Cv                  | 786      | 63    | 0.0    | 56.10  | 907    | 1612 |
| 55 | <i>Ovis aries musimon</i><br>(taxid:9938)          | 1220 Hs, 58 Lc, 32 Ac, 15 Dr, 8 Sp, 5 Bf, 4 Sk, 4 Xl, 4 Cs, 4 Hv                                                     | 206      | 57    | 2e-108 | 41.27  | 645    | 1058 |
| 56 | <i>Bubalus bubalis</i><br>(taxid:89462)            | 579 Hs, 37 Sp, 37 Ac, 26 Bf, 24 Lc, 24 Dr, 19 Cs, 16 Xl, 14 Hv, 12 Sk, 9 At, 5 Ag, 2 Cv                              | 170      | 67    | 1e-98  | 47.58  | 896    | 1116 |
| 57 | <i>Bison bison bison</i><br>(taxid:43346)          | 558 Hs, 12 Lc, 4 Ac, 1 Sk                                                                                            | 204      | 41    | 9e-53  | 36.19  | 757    | 1253 |
| 58 | <i>Bos mutus</i><br>(taxid:72004)                  | 89 Hs, 8 Lc, 3 Ac, 1 Sp, 1 Xl, 1 Cs, 1 Hv, 1 Ag                                                                      | 236      | 14    | 2e-80  | 65.88  | 1363   | 1532 |
| 59 | <i>Bos indicus</i><br>(taxid:9915)                 | 10 Hs                                                                                                                | 90.5     | 14    | 2e-19  | 33.90  | 1094   | 1322 |
| 60 | <i>Bos taurus</i><br>(taxid:9913)                  | 16949 Hs, 6654 Sp, 6325 Ac, 4847 Lc, 4284 Cs, 4177 Bf, 4142 Dr, 3800 Xl, 3408 Hv, 2534 Sk, 2528 Ag, 2066 At, 1338 Cv | 2023     | 92    | 0.0    | 63.53  | 113    | 1612 |
| 61 | <i>Ochotona princeps</i><br>(taxid:9978)           | 1302 Hs, 166 Ac, 155 Lc, 57 Bf, 52 Hv, 51 Dr, 50 Cs, 47 Sk, 45 Sp, 41 At, 40 Xl, 39 Cv, 37 Ag                        | 1844     | 99    | 0.0    | 55.35  | 7      | 1610 |
| 62 | <i>Oryctolagus cuniculus</i><br>(taxid:9986)       | 6268 Hs, 1271 Lc, 1106 Ac, 536 Dr, 492 Hv, 461 Sk, 441 Xl, 425 Bf, 420 Cs, 409 Sp, 315 At, 297 Ag, 232 Cv            | 2068     | 97    | 0.0    | 62.19  | 43     | 1613 |
| 63 | <i>Ictidomys tridecemlineatus</i><br>(taxid:43179) | 5252 Hs, 775 Lc, 595 Ac, 286 Dr, 259 Hv, 232 Sk, 228 Sp, 226 Bf, 224 Cs, 214 Xl, 208 At, 160 Ag, 130 Cv              | 1972     | 99    | 0.0    | 57.68  | 3      | 1610 |

| No | Species and taxon identifier                            | # hits from each query (top hit red)                                                                                 | Top hit  |       |        |        |        |      |
|----|---------------------------------------------------------|----------------------------------------------------------------------------------------------------------------------|----------|-------|--------|--------|--------|------|
|    |                                                         |                                                                                                                      | bitscore | qcovs | evalue | pident | qstart | qend |
| 64 | <i>Heterocephalus glaber</i><br>(taxid:10181)           | 60 Hs, 1 Lc, 1 Ac                                                                                                    | 157      | 57    | 3e-59  | 35.67  | 723    | 1061 |
| 65 | <i>Fukomys damarensis</i><br>(taxid:885580)             | 153 Hs, 2 Lc                                                                                                         | 148      | 57    | 3e-35  | 33.08  | 170    | 557  |
| 66 | <i>Cavia aperea</i><br>(taxid:37548)                    | No significant similarity found                                                                                      |          |       |        |        |        |      |
| 67 | <i>Cavia porcellus</i><br>(taxid:10141)                 | 9718 Hs, 2049 Lc, 1749 Ac, 841 Dr, 819 Bf, 784 Hv, 712 Sp, 683 Cs, 658 Sk, 652 Xl, 550 At, 440 Ag, 416 Cv            | 1843     | 97    | 0.0    | 56.98  | 47     | 1610 |
| 68 | <i>Chinchilla lanigera</i><br>(taxid:34839)             | 248 Hs, 9 Lc                                                                                                         | 152      | 12    | 7e-41  | 51.83  | 790    | 953  |
| 69 | <i>Octodon degus</i><br>(taxid:10160)                   | 9 Hs                                                                                                                 | 110      | 11    | 3e-24  | 34.67  | 189    | 369  |
| 70 | <i>Dipodomys ordii</i><br>(taxid:10020)                 | 24 Hs, 1 Lc, 1 Ac                                                                                                    | 92.0     | 6     | 3e-21  | 43.86  | 762    | 872  |
| 71 | <i>Jaculus jaculus</i><br>(taxid:51337)                 | 1 Hs                                                                                                                 | 50.1     | 14    | 9e-06  | 22.76  | 340    | 577  |
| 72 | <i>Nannospalax galili</i><br>(taxid:1026970)            | 27 Hs, 1 Lc                                                                                                          | 132      | 12    | 6e-31  | 38.28  | 114    | 321  |
| 73 | <i>Mesocricetus auratus</i><br>(taxid:10036)            | 63 Hs, 6 Lc, 4 Ac, 3 Xl, 3 Hv, 2 Sk                                                                                  | 291      | 14    | 2e-88  | 60.94  | 585    | 817  |
| 74 | <i>Cricetulus griseus</i><br>(taxid:10029)              | 170 Hs, 40 Ac, 38 Lc, 25 Sp, 24 Hv, 20 Dr, 19 Bf, 19 Sk, 19 Cs, 17 Xl, 16 At, 12 Ag, 10 Cv                           | 449      | 41    | 5e-128 | 55.31  | 935    | 1347 |
| 75 | <i>Microtus ochrogaster</i><br>(taxid:79684)            | 467 Hs, 85 Ac, 81 Lc, 30 Dr, 27 Sp, 25 Sk, 22 Bf, 22 Hv, 21 Cs, 17 Ag, 17 At, 16 Xl, 12 Cv                           | 928      | 91    | 0.0    | 62.13  | 930    | 1612 |
| 76 | <i>Peromyscus maniculatus bairdii</i><br>(taxid:230844) | 4 Hs                                                                                                                 | 67.4     | 4     | 1e-10  | 46.75  | 1528   | 1604 |
| 77 | <i>Rattus norvegicus</i><br>(taxid:10116)               | 18946 Hs, 9104 Lc, 7388 Ac, 5445 Dr, 4065 Sp, 4034 Hv, 3797 Xl, 3674 Sk, 3627 Bf, 3531 Cs, 3288 At, 2764 Ag, 2563 Cv | 1890     | 92    | 0.0    | 58.75  | 113    | 1612 |
| 78 | <i>Mus musculus</i><br>(taxid:10090)                    | 25459 Hs, 7113 Ac, 6745 Lc, 3856 Dr, 3624 Sp, 3032 Sk, 2966 Bf, 2950 Hv, 2920 Cs, 2832 Xl, 2653 At, 2357 Ag, 1957 Cv | 2676     | 100   | 0.0    | 94.99  | 260    | 1613 |

| No | Species and taxon identifier                            | # hits from each query (top hit red)                                                                                   | Top hit  |       |        |        |        |      |
|----|---------------------------------------------------------|------------------------------------------------------------------------------------------------------------------------|----------|-------|--------|--------|--------|------|
|    |                                                         |                                                                                                                        | bitscore | qcovs | evalue | pident | qstart | qend |
| 79 | <i>Tupaia belangeri</i><br>(taxid:37347)                | 4584 Hs, 616 Lc, 494 Ac, 210 Dr, 182 Sp, 178 Bf, 175 Hv, 157 Sk, 155 Xl, 144 Cs, 142 At, 103 Cv, 102 Ag                | 1959     | 99    | 0.0    | 58.45  | 1      | 1607 |
| 80 | <i>Tupaia chinensis</i><br>(taxid:246437)               | 37 Hs, 1 Lc                                                                                                            | 177      | 10    | 3e-45  | 54.76  | 113    | 280  |
| 81 | <i>Galeopterus variegatus</i><br>(taxid:482537)         | 55 Hs, 6 Sp, 6 Lc, 6 Dr, 6 Ac, 1 Cv                                                                                    | 289      | 11    | 2e-88  | 69.11  | 1044   | 1234 |
| 82 | <i>Otolemur garnettii</i><br>(taxid:30611)              | 12768 Hs, 2627 Lc, 2550 Ac, 1077 Sp, 961 Bf, 955 Hv, 954 Dr, 827 Sk, 810 Cs, 804 Xl, 747 At, 667 Ag, 558 Cv            | 1958     | 100   | 0.0    | 57.50  | 1      | 1608 |
| 83 | <i>Microcebus murinus</i><br>(taxid:30608)              | 11443 Hs, 2135 Lc, 1934 Ac, 855 Bf, 806 Hv, 794 Dr, 787 Sp, 748 Cs, 671 Sk, 661 At, 640 Xl, 504 Ag, 482 Cv             | 2067     | 99    | 0.0    | 60.80  | 1      | 1608 |
| 84 | <i>Tarsius syrichta</i><br>(taxid:9478)                 | 3 Hs                                                                                                                   | 56.6     | 8     | 3e-07  | 36.69  | 1440   | 1574 |
| 85 | <i>Callithrix jacchus</i><br>(taxid:9483)               | 26093 Hs, 6413 Lc, 5613 Ac, 3014 Hv, 2667 Dr, 2655 Bf, 2397 Xl, 2207 Sp, 2169 Sk, 2120 Cs, 2109 At, 1644 Cv, 1429 Ag   | 2712     | 99    | 0.0    | 80.20  | 1      | 1612 |
| 86 | <i>Saimiri boliviensis boliviensis</i><br>(taxid:39432) | 9043 Hs, 1416 Lc, 1210 Ac, 467 Hv, 461 Bf, 454 Dr, 443 Sp, 402 At, 390 Cs, 338 Xl, 332 Sk, 254 Cv, 210 Ag              | 2359     | 99    | 0.0    | 80.03  | 1      | 1433 |
| 87 | <i>Rhinopithecus roxellana</i><br>(taxid:61622)         | 220 Hs, 8 Lc, 1 Ac                                                                                                     | 240      | 21    | 1e-65  | 69.71  | 1259   | 1432 |
| 88 | <i>Nasalis larvatus</i><br>(taxid:43780)                | 7 Hs, 1 Ac                                                                                                             | 160      | 4     | 3e-46  | 88.75  | 1418   | 1497 |
| 89 | <i>Chlorocebus sabaeus</i><br>(taxid:60711)             | 82 Hs, 2 Lc, 2 Ac                                                                                                      | 224      | 22    | 9e-68  | 45.71  | 1305   | 1613 |
| 90 | <i>Macaca fascicularis</i><br>(taxid:9541)              | 44100 Hs, 16722 Lc, 11509 Ac, 4206 Dr, 4120 Hv, 4024 Sp, 3976 Bf, 3584 Cs, 3504 At, 3103 Xl, 2854 Sk, 1300 Cv, 1051 Ag | 3006     | 100   | 0.0    | 89.17  | 1      | 1613 |
| 91 | <i>Macaca mulatta</i><br>(taxid:9544)                   | 22956 Hs, 6008 Lc, 5503 Ac, 2877 Hv, 2625 Dr, 2613 Bf, 2426 Sp, 2399 Xl, 2389 Cs, 2283 Sk, 2162 At, 1658 Cv, 1351 Ag   | 3019     | 100   | 0.0    | 89.54  | 1      | 1613 |



| No | Species and taxon identifier                | # hits from each query (top hit red)                                                                                 | Top hit  |       |        |        |        |      |
|----|---------------------------------------------|----------------------------------------------------------------------------------------------------------------------|----------|-------|--------|--------|--------|------|
|    |                                             |                                                                                                                      | bitscore | qcovs | evalue | pident | qstart | qend |
| 92 | <i>Papio anubis</i><br>(taxid:9555)         | 17213 Hs, 3397 Lc, 2965 Ac, 1396 Dr, 1367 Hv, 1285 Bf, 1240 Sp, 1159 Cs, 1131 Xl, 1082 Sk, 1079 At, 750 Cv, 614 Ag   | 3019     | 100   | 0.0    | 89.60  | 1      | 1613 |
| 93 | <i>Nomascus leucogenys</i><br>(taxid:61853) | 14492 Hs, 2904 Lc, 2692 Ac, 1181 Hv, 1125 Dr, 1105 Sp, 1069 Bf, 982 Cs, 958 Xl, 936 Sk, 902 At, 682 Cv, 534 Ag       | 3104     | 100   | 0.0    | 92.91  | 1      | 1613 |
| 94 | <i>Pongo abelii</i><br>(taxid:9601)         | 27703 Hs, 6718 Lc, 6214 Ac, 3125 Hv, 3054 Dr, 2854 Bf, 2770 Sp, 2622 Xl, 2563 Cs, 2508 Sk, 2363 At, 1893 Cv, 1502 Ag | 3199     | 100   | 0.0    | 95.66  | 1      | 1613 |
| 95 | <i>Gorilla gorilla gorilla</i> (taxid:9595) | 11864 Hs, 2445 Lc, 2246 Ac, 954 Dr, 950 Bf, 937 Hv, 901 Sp, 801 Xl, 794 Cs, 759 At, 751 Sk, 556 Cv, 457 Ag           | 3221     | 100   | 0.0    | 96.76  | 1      | 1613 |
| 96 | <i>Pan paniscus</i><br>(taxid:9597)         | 973 Hs, 77 Lc, 60 Ac, 22 Sp, 13 Dr, 12 Hv, 12 At, 11 Cs, 10 Bf, 9 Cv, 9 Xl, 9 Ag, 8 Sk                               | 3205     | 100   | 0.0    | 96.45  | 1      | 1613 |
| 97 | <i>Pan troglodytes</i><br>(taxid:9598)      | 23666 Hs, 6383 Lc, 6104 Ac, 2870 Hv, 2750 Dr, 2644 Bf, 2432 Cs, 2430 Sp, 2401 Sk, 2390 Xl, 2221 At, 1617 Cv, 1355 Ag | 3225     | 100   | 0.0    | 96.94  | 1      | 1613 |
| 98 | <i>Homo sapiens</i><br>(taxid:9606)         | 15381 Hs, 3318 Lc, 3209 Ac, 1790 Xl, 1691 Hv, 1672 At, 1647 Sp, 1569 Sk, 1558 Bf, 1558 Dr, 1500 Cs, 1418 Cv, 1397 Ag | 3275     | 100   | 0.0    | 98.41  | 1      | 1613 |

#### SAUROPSIDA

|     |                                             |                                                                                           |     |    |       |       |      |      |
|-----|---------------------------------------------|-------------------------------------------------------------------------------------------|-----|----|-------|-------|------|------|
| 99  | <i>Apalone spinifera</i><br>(taxid:55534)   | No significant similarity found                                                           |     |    |       |       |      |      |
| 100 | <i>Pelodiscus sinensis</i><br>(taxid:13735) | 24 Xl, 18 Sp, 18 Bf, 16 Sk, 16 Hs, 16 Lc, 16 Hv, 14 Cs, 14 Ac, 13 Dr, 11 Cv, 7 Ag, 7 At   | 241 | 8  | 2e-63 | 61.50 | 1326 | 1503 |
| 101 | <i>Chelonia mydas</i><br>(taxid:8469)       | 29 Xl, 9 Sk, 4 Bf, 3 Sp, 3 Hv, 3 Ac, 2 Hs, 2 Dr, 2 Cs, 2 At, 1 Cv, 1 Lc, 1 Ag             | 142 | 16 | 1e-33 | 45.62 | 813  | 971  |
| 102 | <i>Chrysemys picta bellii</i> (taxid:8478)  | 44 Ac, 41 Xl, 40 Sp, 36 Hs, 35 Bf, 35 Lc, 28 Cs, 24 Cv, 18 Sk, 14 Dr, 13 Ag, 13 At, 10 Hv | 160 | 8  | 2e-38 | 45.81 | 876  | 1053 |

| No  | Species and taxon identifier                        | # hits from each query (top hit red)                                                                  | Top hit  |       |        |        |        |      |
|-----|-----------------------------------------------------|-------------------------------------------------------------------------------------------------------|----------|-------|--------|--------|--------|------|
|     |                                                     |                                                                                                       | bitscore | qcovs | evalue | pident | qstart | qend |
| 103 | <i>Struthio camelus australis</i><br>(taxid:441894) | 2 Cv, 2 Bf, 2 Hs, 2 Ac, 1 Sp, 1 Xl, 1 Lc, 1 Dr, 1 Cs, 1 Ag, 1 At                                      | 77.8     | 18    | 6e-14  | 24.68  | 852    | 1152 |
| 104 | <i>Tinamus guttatus</i><br>(taxid:94827)            | 3 Sp, 3 Bf, 3 Hs, 3 Lc, 3 Cs, 3 Ac, 2 Cv, 2 Sk, 2 Xl, 2 Dr, 2 Hv, 2 Ag, 1 At                          | 104      | 26    | 3e-22  | 28.84  | 775    | 1185 |
| 105 | <i>Anas platyrhynchos</i><br>(taxid:8839)           | 7 Lc, 6 Bf, 3 Sp, 3 Hs, 3 Ac, 2 Cv, 1 Dr, 1 Cs, 1 Hv, 1 At                                            | 92.0     | 13    | 1e-17  | 27.95  | 935    | 1154 |
| 106 | <i>Lyrurus tetrix tetrix</i><br>(taxid:162951)      | No significant similarity found                                                                       |          |       |        |        |        |      |
| 107 | <i>Gallus gallus</i><br>(taxid:9031)                | 935 Bf, 934 Lc, 877 Sp, 790 Ac, 787 Hs, 641 Cs, 385 Dr, 327 Cv, 225 At, 200 Sk, 161 Ag, 149 Xl, 39 Hv | 838      | 92    | 0.0    | 61.81  | 341    | 992  |
| 108 | <i>Coturnix japonica</i><br>(taxid:93934)           | 11 Sp, 6 Lc, 5 Cv, 4 Bf, 1 Hs, 1 Dr, 1 Cs, 1 Ac, 1 At                                                 | 73.2     | 12    | 6e-14  | 29.76  | 852    | 1052 |
| 109 | <i>Meleagris gallopavo</i><br>(taxid:9103)          | 16 Sp, 16 Lc, 15 Bf, 15 Cs, 13 Cv, 13 Hs, 13 Ac, 11 At, 10 Sk, 10 Dr, 10 Ag, 8 Xl, 3 Hv               | 107      | 17    | 2e-22  | 28.67  | 830    | 1120 |
| 110 | <i>Colinus virginianus</i><br>(taxid:9014)          | No significant similarity found                                                                       |          |       |        |        |        |      |
| 111 | <i>Acanthisitta chloris</i><br>(taxid:57068)        | 1 Bf                                                                                                  | 51.6     | 8     | 9e-07  | 27.14  | 931    | 1068 |
| 112 | <i>Manacus vitellinus</i><br>(taxid:328815)         | 3 Sp, 3 Bf, 3 Hs, 3 Lc, 3 Ac, 2 Cs, 1 Cv, 1 Dr, 1 Ag                                                  | 80.1     | 14    | 3e-15  | 27.76  | 817    | 1057 |
| 113 | <i>Zonotrichia albicollis</i><br>(taxid:44394)      | 2 Bf, 1 Lc, 1 Cs, 1 Ac                                                                                | 68.9     | 17    | 5e-11  | 24.91  | 658    | 924  |
| 114 | <i>Geospiza fortis</i><br>(taxid:48883)             | No significant similarity found                                                                       |          |       |        |        |        |      |
| 115 | <i>Serinus canaria</i><br>(taxid:9135)              | 3 Sp, 3 Bf, 2 Cv, 2 Xl, 2 Hs, 2 Lc, 2 Dr, 2 Cs, 2 Ac, 2 Ag, 2 At, 1 Sk, 1 Hv                          | 105      | 23    | 5e-23  | 25.46  | 658    | 1021 |
| 116 | <i>Taeniopygia guttata</i><br>(taxid:59729)         | 3 Hs, 1 Sp, 1 Bf, 1 Xl, 1 Lc, 1 Dr, 1 Cs, 1 Ac                                                        | 203      | 11    | 5e-61  | 54.50  | 137    | 325  |
| 117 | <i>Ficedula albicollis</i><br>(taxid:59894)         | 1 Lc, 1 Cs                                                                                            | 56.6     | 8     | 3e-12  | 29.45  | 836    | 977  |
| 118 | <i>Pseudopodoces humilis</i><br>(taxid:181119)      | No significant similarity found                                                                       |          |       |        |        |        |      |
| 119 | <i>Corvus brachyrhynchos</i><br>(taxid:85066)       | 3 Ac, 2 Hs, 2 Lc, 2 Cs, 1 Cv, 1 Sp, 1 Bf, 1 Sk, 1 Xl, 1 Dr, 1 At                                      | 93.2     | 13    | 4e-19  | 32.88  | 836    | 1052 |
| 120 | <i>Corvus cornix cornix</i><br>(taxid:932674)       | 9 Hs, 3 Lc, 2 Cs, 2 Ac, 1 Cv, 1 Sp, 1 Bf, 1 Sk, 1 Xl, 1 Dr, 1 At                                      | 95.9     | 13    | 3e-19  | 34.23  | 836    | 1052 |

| No  | Species and taxon identifier                             | # hits from each query (top hit red)                                         | Top hit  |       |        |        |        |      |
|-----|----------------------------------------------------------|------------------------------------------------------------------------------|----------|-------|--------|--------|--------|------|
|     |                                                          |                                                                              | bitscore | qcovs | evalue | pident | qstart | qend |
| 121 | <i>Ara macao</i><br>(taxid:176014)                       | No significant similarity found                                              |          |       |        |        |        |      |
| 122 | <i>Amazona vittata</i><br>(taxid:241585)                 | No significant similarity found                                              |          |       |        |        |        |      |
| 123 | <i>Melopsittacus undulatus</i><br>(taxid:13146)          | 5 Sp, 5 Bf, 5 Hs, 5 Lc, 5 Ac, 4 Cv, 3 Cs, 3 At, 2 Xl, 1 Dr                   | 70.9     | 13    | 8e-12  | 26.29  | 931    | 1154 |
| 124 | <i>Nestor notabilis</i><br>(taxid:176057)                | 2 Hs, 2 Cs, 2 Ac, 1 Sp, 1 Bf, 1 Xl, 1 Lc, 1 Dr, 1 At                         | 82.4     | 22    | 7e-16  | 21.41  | 669    | 1021 |
| 125 | <i>Falco cherrug</i><br>(taxid:345164)                   | 1 Ac                                                                         | 52.4     | 12    | 4e-06  | 22.92  | 669    | 856  |
| 126 | <i>Falco peregrinus</i><br>(taxid:8954)                  | No significant similarity found                                              |          |       |        |        |        |      |
| 127 | <i>Cariama cristata</i><br>(taxid:54380)                 | 4 Hs, 3 Bf, 3 Lc, 3 Ac, 2 Sp, 2 Cs                                           | 84.3     | 12    | 2e-16  | 27.70  | 847    | 1057 |
| 128 | <i>Merops nubicus</i><br>(taxid:57421)                   | 3 Sp, 3 Bf, 3 Hs, 3 Ac, 2 Lc, 2 Cs, 1 Cv, 1 At                               | 85.5     | 15    | 2e-17  | 29.02  | 809    | 1057 |
| 129 | <i>Picoides pubescens</i><br>(taxid:118200)              | 6 Sp, 5 Bf, 5 Lc, 5 At, 4 Cv, 4 Sk, 4 Xl, 4 Hs, 4 Dr, 4 Cs, 4 Hv, 4 Ac, 4 Ag | 107      | 26    | 5e-24  | 23.57  | 658    | 1061 |
| 130 | <i>Buceros rhinoceros silvestris</i><br>(taxid:175836)   | 1 Sp, 1 Bf, 1 Lc, 1 Ac                                                       | 64.3     | 13    | 9e-11  | 26.05  | 835    | 1049 |
| 131 | <i>Apaloderma vittatum</i><br>(taxid:57397)              | 4 Sp, 4 Bf, 4 Hs, 4 Lc, 3 Ac, 2 Cv, 2 Sk, 2 Xl, 2 Dr, 2 Cs, 2 At, 1 Hv, 1 Ag | 77.4     | 12    | 3e-15  | 29.47  | 848    | 1052 |
| 132 | <i>Leptosomus discolor</i><br>(taxid:188344)             | 4 Bf, 3 Sp, 3 Lc, 2 Hs, 2 Cs, 2 Ac, 2 Ag, 1 Cv, 1 Xl, 1 At                   | 79.7     | 21    | 6e-15  | 20.23  | 684    | 1021 |
| 133 | <i>Haliaeetus albicilla</i><br>(taxid:8969)              | 3 Lc, 3 Ac, 2 Sp, 2 Bf, 2 Hs, 2 Cs, 1 Cv, 1 Ag                               | 70.9     | 11    | 9e-13  | 30.89  | 860    | 1048 |
| 134 | <i>Haliaeetus leucocephalus</i><br>(taxid:52644)         | 3 Sp, 3 Ac, 2 Bf, 2 Sk, 2 Hs, 2 Cs, 2 Ag, 2 At, 1 Xl, 1 Lc, 1 Dr, 1 Hv       | 100      | 19    | 6e-21  | 25.40  | 719    | 1018 |
| 135 | <i>Aquila chrysaetos canadensis</i><br>(taxid:216574)    | 3 Ac, 2 Sp, 2 Cs, 1 Cv, 1 Bf, 1 Sk, 1 Xl, 1 Hs, 1 Lc, 1 Dr, 1 At             | 95.5     | 25    | 5e-19  | 23.50  | 658    | 1057 |
| 136 | <i>Cathartes aura</i><br>(taxid:43455)                   | No significant similarity found                                              |          |       |        |        |        |      |
| 137 | <i>Tyto alba</i><br>(taxid:56313)                        | 3 Sp, 2 Bf, 2 Hs, 2 Lc, 1 Cv, 1 Sk, 1 Dr, 1 Cs, 1 Ac, 1 Ag                   | 69.7     | 18    | 9e-12  | 25.96  | 669    | 947  |
| 138 | <i>Colinus striatus</i><br>(taxid:57412)                 | 2 Cv, 2 Bf, 2 Lc, 1 Sp, 1 Xl, 1 Hs, 1 Dr, 1 Cs, 1 Ac                         | 75.5     | 24    | 7e-14  | 20.57  | 694    | 1093 |
| 139 | <i>Charadrius vociferus</i><br>(taxid:50402)             | 1 Sp, 1 Bf, 1 Sk, 1 Xl, 1 Hs, 1 Lc, 1 Dr, 1 Cs, 1 Hv, 1 Ac, 1 Ag             | 89.4     | 22    | 1e-17  | 22.52  | 845    | 1208 |
| 140 | <i>Balearica regulorum gibbericeps</i><br>(taxid:100784) | 1 Hs, 1 Cs, 1 Ac                                                             | 52.4     | 9     | 3e-07  | 26.75  | 879    | 1032 |

| No  | Species and taxon identifier                      | # hits from each query (top hit red)                                         | Top hit  |       |        |        |        |      |
|-----|---------------------------------------------------|------------------------------------------------------------------------------|----------|-------|--------|--------|--------|------|
|     |                                                   |                                                                              | bitscore | qcovs | evalue | pident | qstart | qend |
| 141 | <i>Chlamydotis macqueenii</i><br>(taxid:187382)   | 4 Sp, 4 Lc, 3 Bf, 3 Hs, 2 Cv, 2 Cs, 1 Sk, 1 Xl, 1 Dr, 1 Hv, 1 Ac, 1 Ag       | 81.6     | 14    | 7e-16  | 28.23  | 817    | 1057 |
| 142 | <i>Cuculus canorus</i><br>(taxid:55661)           | 7 Sp, 7 Bf, 6 Cv, 6 Sk, 6 Hs, 6 Lc, 6 Dr, 6 Cs, 6 Hv, 6 Ac, 6 At, 5 Xl, 5 Ag | 97.4     | 25    | 6e-21  | 24.15  | 658    | 1057 |
| 143 | <i>Fulmarus glacialis</i><br>(taxid:30455)        | 3 Bf, 2 Ac, 1 Sp, 1 Lc, 1 Cs                                                 | 63.9     | 9     | 4e-10  | 26.32  | 752    | 903  |
| 144 | <i>Aptenodytes forsteri</i><br>(taxid:9233)       | 3 Sp, 3 Bf, 3 Hs, 3 Lc, 3 Ac, 2 Dr, 2 Cs, 1 Cv, 1 Sk, 1 Xl, 1 Hv, 1 At       | 87.0     | 13    | 7e-17  | 28.76  | 836    | 1057 |
| 145 | <i>Pygoscelis adeliae</i><br>(taxid:9238)         | 6 Sp, 6 Bf, 6 Hs, 6 Ac, 5 Cv, 5 Lc, 5 Cs, 4 At, 2 Sk, 2 Xl, 2 Dr             | 94.0     | 20    | 4e-19  | 22.46  | 624    | 947  |
| 146 | <i>Phalacrocorax carbo</i><br>(taxid:9209)        | No significant similarity found                                              |          |       |        |        |        |      |
| 147 | <i>Pelecanus crispus</i><br>(taxid:36300)         | 2 Sp, 2 Bf, 2 Hs, 2 Lc, 2 Ac, 1 Cv, 1 Xl, 1 Dr, 1 Cs, 1 At                   | 77.0     | 15    | 4e-14  | 23.23  | 833    | 1085 |
| 148 | <i>Nipponia nippon</i><br>(taxid:128390)          | 11 Bf, 11 Lc, 10 Sp, 9 Hs, 5 Ac, 3 Cv, 2 Cs, 2 Ag, 1 Xl, 1 Dr, 1 At          | 80.9     | 16    | 2e-15  | 25.96  | 930    | 1199 |
| 149 | <i>Egretta garzetta</i><br>(taxid:188379)         | 2 Bf, 2 Hs, 2 Lc, 2 Cs, 2 Ac, 1 Cv, 1 Sp, 1 Sk, 1 Xl, 1 Dr, 1 At             | 84.0     | 24    | 3e-16  | 20.68  | 845    | 1244 |
| 150 | <i>Phaethon lepturus</i><br>(taxid:97097)         | No significant similarity found                                              |          |       |        |        |        |      |
| 151 | <i>Gavia stellata</i><br>(taxid:37040)            | 5 Sp, 5 Bf, 5 Ac, 4 Hs, 4 Lc, 3 Cs, 2 Cv, 2 Ag, 1 Sk, 1 Xl, 1 Dr, 1 At       | 92.0     | 14    | 1e-19  | 31.02  | 813    | 1052 |
| 152 | <i>Tauraco erythrolophus</i><br>(taxid:121530)    | 1 Cs                                                                         | 55.8     | 7     | 6e-08  | 27.69  | 914    | 1040 |
| 153 | <i>Opisthocomus hoazin</i><br>(taxid:30419)       | 6 Lc, 6 Ac, 5 Sp, 5 Hs, 4 Bf, 4 Cs, 3 Cv, 3 Xl, 3 Dr, 3 Ag, 3 At, 1 Sk, 1 Hv | 95.1     | 19    | 4e-20  | 24.75  | 660    | 954  |
| 154 | <i>Columba livia</i><br>(taxid:8932)              | No significant similarity found                                              |          |       |        |        |        |      |
| 155 | <i>Pterocles gutturalis</i><br>(taxid:240206)     | 2 Ac, 2 Hs, 1 Xl, 1 Dr, 1 At                                                 | 70.1     | 22    | 3e-12  | 22.75  | 673    | 1021 |
| 156 | <i>Calypte anna</i><br>(taxid:9244)               | 1 Bf, 1 Lc                                                                   | 58.9     | 7     | 2e-08  | 25.41  | 958    | 1074 |
| 157 | <i>Chaetura pelagica</i><br>(taxid:8897)          | No significant similarity found                                              |          |       |        |        |        |      |
| 158 | <i>Caprimulgus carolinensis</i><br>(taxid:279965) | 3 Sp, 3 Hs, 3 Cs, 3 Ac, 2 Bf, 2 Lc, 1 Cv, 1 Sk, 1 Xl, 1 Dr                   | 89.0     | 12    | 1e-18  | 30.73  | 847    | 1057 |
| 159 | <i>Eurypyga helias</i><br>(taxid:54383)           | No significant similarity found                                              |          |       |        |        |        |      |

| No  | Species and taxon identifier                      | # hits from each query (top hit red)                                                      | Top hit  |       |        |        |        |      |
|-----|---------------------------------------------------|-------------------------------------------------------------------------------------------|----------|-------|--------|--------|--------|------|
|     |                                                   |                                                                                           | bitscore | qcovs | evalue | pident | qstart | qend |
| 160 | <i>Mesitornis unicolor</i> (taxid:54374)          | 2 Cv, 2 Sp, 2 Bf, 2 Xl, 2 Hs, 2 Lc, 2 Dr, 2 Cs, 2 Hv, 2 Ac, 2 Ag, 1 Sk                    | 88.2     | 10    | 3e-18  | 35.39  | 881    | 1049 |
| 161 | <i>Podiceps cristatus</i> (taxid:345573)          | No significant similarity found                                                           |          |       |        |        |        |      |
| 162 | <i>Phoenicopterus ruber ruber</i> (taxid:9218)    | No significant similarity found                                                           |          |       |        |        |        |      |
| 163 | <i>Alligator mississippiensis</i> (taxid:8496)    | 55 Lc, 50 Xl, 46 Bf, 45 Cs, 45 Ac, 40 Sp, 39 Hs, 38 Sk, 28 At, 24 Cv, 24 Dr, 23 Ag, 19 Hv | 221      | 15    | 4e-57  | 39.75  | 1085   | 1399 |
| 164 | <i>Alligator sinensis</i> (taxid:38654)           | 22 Xl, 18 Lc, 17 Sk, 12 Ac, 11 Sp, 11 Bf, 10 Cs, 10 Hv, 8 Hs, 7 Dr, 5 Ag, 4 Cv, 4 At      | 206      | 13    | 2e-56  | 45.80  | 1170   | 1407 |
| 165 | <i>Crocodylus porosus</i> (taxid:8502)            | 13 Cs, 12 Hs, 12 Dr, 11 Lc, 10 Bf, 10 Ac, 9 Sp, 9 Xl, 8 Cv, 8 Sk, 8 At, 7 Ag, 6 Hv        | 94.0     | 26    | 8e-21  | 23.04  | 658    | 1063 |
| 166 | <i>Gavialis gangeticus</i> (taxid:94835)          | No significant similarity found                                                           |          |       |        |        |        |      |
| 167 | <i>Pogona vitticeps</i> (taxid:103695)            | 37 Ac, 35 Hs, 33 Lc, 31 Sp, 29 Dr, 26 Bf, 26 Xl, 23 Ag, 20 Cs, 19 Hv, 18 Cv, 15 Sk, 6 At  | 129      | 66    | 7e-31  | 27.44  | 729    | 1102 |
| 168 | <i>Anolis carolinensis</i> (taxid:28377)          | 99 Ac, 87 Hs, 72 Lc, 37 Bf, 37 Sk, 35 Xl, 31 Hv, 28 Sp, 27 Dr, 25 Ag, 20 Cs, 15 At, 14 Cv | 533      | 76    | 2e-157 | 29.64  | 337    | 1568 |
| 169 | <i>Vipera berus berus</i> (taxid:31156)           | No significant similarity found                                                           |          |       |        |        |        |      |
| 170 | <i>Crotalus mitchellii pyrrhus</i> (taxid:384069) | No significant similarity found                                                           |          |       |        |        |        |      |
| 171 | <i>Ophiophagus hannah</i> (taxid:8665)            | 2 Hs, 2 Ac                                                                                | 52.4     | 7     | 1e-10  | 34.21  | 1406   | 1481 |
| 172 | <i>Python bivittatus</i> (taxid:176946)           | 5 Lc, 5 Ac, 3 Hs, 2 Sp, 2 Sk, 2 Dr, 2 Cs, 1 Cv, 1 Bf, 1 Xl, 1 Hv, 1 Ag, 1 At              | 142      | 12    | 1e-33  | 35.71  | 763    | 958  |

#### AMPHIBIA

|     |                                        |                                                                                                         |      |    |     |       |     |      |
|-----|----------------------------------------|---------------------------------------------------------------------------------------------------------|------|----|-----|-------|-----|------|
| 173 | <i>Nanorana parkeri</i> (taxid:125878) | No significant similarity found                                                                         |      |    |     |       |     |      |
| 174 | <i>Xenopus tropicalis</i> (taxid:8364) | 1122 Lc, 982 Hs, 884 Ac, 584 Sp, 580 Bf, 455 Sk, 452 Dr, 446 Cs, 437 Cv, 425 Ag, 411 Xl, 374 At, 308 Hv | 1909 | 88 | 0.0 | 84.18 | 774 | 1879 |

#### NEOPTERYGII

| No  | Species and taxon identifier                    | # hits from each query (top hit red)                                                                                        | Top hit  |       |        |        |        |      |
|-----|-------------------------------------------------|-----------------------------------------------------------------------------------------------------------------------------|----------|-------|--------|--------|--------|------|
|     |                                                 |                                                                                                                             | bitscore | qcovs | evalue | pident | qstart | qend |
| 175 | <i>Lepisosteus oculatus</i><br>(taxid:7918)     | 7 Lc, 5 Hs, 4 Sp, 4 Bf, 3 Sk, 3 Dr, 3 Hv, <b>3 Ac</b> , 2 Cv, 2 Xl, 2 Cs, 2 Ag, 1 At                                        | 106      | 18    | 4e-23  | 27.68  | 732    | 1020 |
| 176 | <i>Anguilla anguilla</i><br>(taxid:7936)        | 2 Xl, 2 Lc, 1 Sp, <b>1 Hv</b>                                                                                               | 49.7     | 8     | 2e-07  | 28.93  | 847    | 967  |
| 177 | <i>Anguilla japonica</i><br>(taxid:7937)        | 1 Cv, 1 Sp, 1 Sk, 1 Xl, <b>1 Hs</b> , 1 Lc, 1 Cs, 1 Hv, 1 Ac, 1 Ag, 1 At                                                    | 85.9     | 20    | 1e-17  | 24.86  | 794    | 1124 |
| 178 | <i>Danio rerio</i><br>(taxid:7955)              | 3052 Lc, <b>2857 Hs</b> , 2498 Dr, 2025 Xl, 1933 Ac, 1877 Sk, 1577 Bf, 1565 Sp, 1472 Hv, 1403 Ag, 1347 Cs, 1177 Cv, 1066 At | 2897     | 100   | 0.0    | 93.13  | 1      | 1520 |
| 179 | <i>Astyanax mexicanus</i><br>(taxid:7994)       | <b>11 Lc</b> , 7 Xl, 7 Hs, 7 Ac, 6 Bf, 6 Sk, 4 Dr, 3 Hv, 3 Ag, 2 Sp, 2 At, 1 Cv, 1 Cs                                       | 137      | 7     | 1e-32  | 53.54  | 927    | 1053 |
| 180 | <i>Oryzias latipes</i><br>(taxid:8090)          | 3835 Lc, 3052 Hs, 2539 Ac, 1867 Sp, 1684 Bf, 1673 Sk, <b>1655 Xl</b> , 1349 Cs, 1348 Dr, 1337 Hv, 1260 Cv, 1079 At, 980 Ag  | 832      | 71    | 0.0    | 36.77  | 778    | 2067 |
| 181 | <i>Poecilia formosa</i><br>(taxid:48698)        | 18 Lc, 14 Hs, 9 Hv, 8 Cv, 8 Sk, 8 Cs, 7 Xl, 7 Ac, <b>4 Sp</b> , 4 Bf, 4 Dr, 4 Ag, 2 At                                      | 240      | 31    | 7e-64  | 37.63  | 271    | 639  |
| 182 | <i>Xiphophorus maculatus</i><br>(taxid:8083)    | 30 Lc, 24 Hs, <b>23 Xl</b> , 23 Hv, 21 Sk, 19 Cv, 19 Cs, 15 Dr, 13 Sp, 10 Bf, 10 Ac, 8 At, 7 Ag                             | 201      | 10    | 1e-51  | 47.91  | 1143   | 1356 |
| 183 | <i>Fundulus heteroclitus</i><br>(taxid:8078)    | <b>60 Lc</b> , 56 Hs, 44 Ac, 29 Ag, 25 Xl, 24 Bf, 23 Sk, 21 Sp, 21 Cs, 21 At, 13 Dr, 13 Hv, 5 Cv                            | 427      | 86    | 3e-174 | 33.16  | 865    | 1625 |
| 184 | <i>Takifugu flavidus</i><br>(taxid:433684)      | No significant similarity found                                                                                             |          |       |        |        |        |      |
| 185 | <i>Takifugu rubripes</i><br>(taxid:31033)       | 60 Lc, 51 Ac, 49 Hs, <b>43 Xl</b> , 42 Cs, 35 Sp, 34 Cv, 33 Sk, 29 Bf, 23 Dr, 22 Hv, 22 Ag, 22 At                           | 648      | 68    | 0.0    | 33.68  | 840    | 2069 |
| 186 | <i>Tetraodon nigroviridis</i><br>(taxid:99883)  | 37 Hs, 33 Sp, <b>31 Xl</b> , 31 Ac, 31 Ag, 29 At, 26 Bf, 22 Hv, 21 Sk, 21 Lc, 21 Cs, 18 Dr, 16 Cv                           | 843      | 76    | 0.0    | 35.27  | 673    | 2076 |
| 187 | <i>Cynoglossus semilaevis</i><br>(taxid:244447) | 8 Hs, 8 Lc, 8 Ac, 6 Cv, <b>6 Cs</b> , 5 Sp, 5 Sk, 5 Xl, 5 Hv, 4 Dr, 4 Ag, 4 At, 2 Bf                                        | 154      | 32    | 3e-39  | 23.95  | 760    | 1285 |
| 188 | <i>Haplochromis burtoni</i><br>(taxid:8153)     | 54 Lc, 38 Hs, 30 Ac, 20 Sk, 18 Bf, 16 Dr, 15 Sp, 15 At, 14 Xl, 11 Hv, 8 Cv, 7 Ag, <b>6 Cs</b>                               | 656      | 72    | 0.0    | 34.61  | 417    | 1608 |

| No                    | Species and taxon identifier                        | # hits from each query (top hit red)                                                      | Top hit  |       |        |        |        |      |
|-----------------------|-----------------------------------------------------|-------------------------------------------------------------------------------------------|----------|-------|--------|--------|--------|------|
|                       |                                                     |                                                                                           | bitscore | qcovs | evalue | pident | qstart | qend |
| 189                   | <i>Pundamilia nyererei</i><br>(taxid:303518)        | 23 Lc, 21 Ac, 17 Hs, 9 Sp, 8 Bf, 6 At, 5 Sk, 5 XI, 5 Cs, 4 Dr, 4 Ag, 3 Cv, 3 Hv           | 255      | 13    | 2e-68  | 45.26  | 1127   | 1411 |
| 190                   | <i>Maylandia zebra</i><br>(taxid:106582)            | 28 Lc, 23 Hs, 14 Ac, 13 Bf, 12 Ag, 11 XI, 10 Sk, 9 Cs, 8 Sp, 6 Cv, 6 Hv, 6 At, 4 Dr       | 355      | 35    | 8e-113 | 47.76  | 882    | 1258 |
| 191                   | <i>Neolamprologus brichardi</i><br>(taxid:32507)    | 5 Hs, 4 Lc, 3 Bf, 1 Sp, 1 Sk, 1 Ac                                                        | 69.3     | 20    | 4e-11  | 21.02  | 740    | 1057 |
| 192                   | <i>Oreochromis niloticus</i><br>(taxid:8128)        | 91 Lc, 63 Hs, 55 Ac, 43 Sp, 41 Bf, 34 Sk, 33 Ag, 29 Cv, 29 XI, 29 Dr, 29 Cs, 29 Hv, 22 At | 429      | 48    | 4e-121 | 33.33  | 918    | 1628 |
| 193                   | <i>Sebastes nigrocinctus</i><br>(taxid:72089)       | No significant similarity found                                                           |          |       |        |        |        |      |
| 194                   | <i>Sebastes rubrivinctus</i><br>(taxid:72099)       | No significant similarity found                                                           |          |       |        |        |        |      |
| 195                   | <i>Gasterosteus aculeatus</i><br>(taxid:69293)      | 58 Lc, 57 Ac, 50 Hs, 44 Bf, 43 Sk, 42 XI, 35 At, 32 Sp, 32 Dr, 29 Ag, 27 Cv, 26 Cs, 13 Hv | 449      | 54    | 0.0    | 41.39  | 931    | 1503 |
| 196                   | <i>Gadus morhua</i><br>(taxid:8049)                 | 3 Lc, 2 Bf, 1 Cv                                                                          | 61.6     | 9     | 5e-10  | 21.33  | 1479   | 1628 |
| <b>CHONDRICHTHYES</b> |                                                     |                                                                                           |          |       |        |        |        |      |
| 197                   | <i>Callorhynchus milii</i><br>(taxid:7868)          | 96 Lc, 46 Ac, 41 Sp, 36 Ag, 35 Hs, 34 Cv, 29 Bf, 17 Cs, 8 Sk, 7 At, 6 XI, 6 Drp           | 97.1     | 19    | 2e-19  | 26.16  | 659    | 954  |
| 198                   | <i>Carcharhinus brachyurus</i><br>(taxid:671158)    | No significant similarity found                                                           |          |       |        |        |        |      |
| <b>ECDYSOZOA</b>      |                                                     |                                                                                           |          |       |        |        |        |      |
| 199                   | <i>Ephemera danica</i><br>(taxid:1049336)           | No significant similarity found                                                           |          |       |        |        |        |      |
| 200                   | <i>Ladona fulva</i><br>(taxid:123851)               | No significant similarity found                                                           |          |       |        |        |        |      |
| 201                   | <i>Pediculus humanus corporis</i><br>(taxid:121224) | 15 Lc, 14 Ac, 13 Hs, 11 At, 10 Cv, 10 Sp, 10 Bf, 10 Sk, 10 XI, 10 Cs, 10 Hv, 10 Ag, 9 Dr  | 85.9     | 23    | 1e-16  | 24.67  | 966    | 1404 |
| 202                   | <i>Frankliniella occidentalis</i><br>(taxid:133901) | No significant similarity found                                                           |          |       |        |        |        |      |
| 203                   | <i>Diaphorina citri</i><br>(taxid:121845)           | 38 Lc, 37 Cs, 37 Ac, 34 Sp, 33 Hs, 30 XI, 29 Sk, 28 Cv, 27 Ag, 24 At, 22 Hv, 21 Bf, 18 Dr | 132      | 30    | 2e-31  | 28.69  | 307    | 665  |

| No  | Species and taxon identifier                   | # hits from each query (top hit red)                                                                   | Top hit  |       |        |        |        |      |
|-----|------------------------------------------------|--------------------------------------------------------------------------------------------------------|----------|-------|--------|--------|--------|------|
|     |                                                |                                                                                                        | bitscore | qcovs | evalue | pident | qstart | qend |
| 204 | <i>Pachyphylla venusta</i> (taxid:38123)       | No significant similarity found                                                                        |          |       |        |        |        |      |
| 205 | <i>Acyrtosiphon pisum</i> (taxid:7029)         | 79 Ac, 68 Cs, 56 Hs, 50 Lc, 49 Sp, 44 Sk, <b>42 XI</b> , 40 At, 32 Bf, 30 Ag, 27 Cv, 21 Hv, 17 Dr      | 120      | 12    | 1e-26  | 32.34  | 1223   | 1486 |
| 206 | <i>Nilaparvata lugens</i> (taxid:108931)       | <b>2 Ac</b>                                                                                            | 50.4     | 5     | 4e-08  | 32.58  | 775    | 860  |
| 207 | <i>Oncopeltus fasciatus</i> (taxid:7536)       | No significant similarity found                                                                        |          |       |        |        |        |      |
| 208 | <i>Rhodnius prolixus</i> (taxid:13249)         | 1 Sp, 1 Sk, 1 XI, 1 Hs, 1 Dr, 1 Cs, 1 Ac, <b>1 Ag</b>                                                  | 64.3     | 12    | 4e-12  | 22.58  | 864    | 1039 |
| 209 | <i>Cimex lectularius</i> (taxid:79782)         | <b>22 Hs</b> , 14 Ac, 12 Lc, 12 Cs, 7 Sp, 6 Bf, 6 XI, 5 Dr, 5 Hv, 5 Ag, 5 At, 4 Cv, 4 Sk               | 100      | 13    | 5e-21  | 29.22  | 785    | 1001 |
| 210 | <i>Onthophagus taurus</i> (taxid:166361)       | No significant similarity found                                                                        |          |       |        |        |        |      |
| 211 | <i>Agrilus planipennis</i> (taxid:224129)      | No significant similarity found                                                                        |          |       |        |        |        |      |
| 212 | <i>Tribolium castaneum</i> (taxid:7070)        | 23 Sp, 22 XI, 22 Lc, 20 Bf, 15 Hs, <b>14 Ac</b> , 11 Hv, 11 Ag, 10 At, 8 Cs, 7 Sk, 6 Cv, 2 Dr          | 132      | 28    | 2e-30  | 24.67  | 737    | 1169 |
| 213 | <i>Anoplophora glabripennis</i> (taxid:217634) | No significant similarity found                                                                        |          |       |        |        |        |      |
| 214 | <i>Leptinotarsa decemlineata</i> (taxid:7539)  | No significant similarity found                                                                        |          |       |        |        |        |      |
| 215 | <i>Dendroctonus ponderosae</i> (taxid:77166)   | No significant similarity found                                                                        |          |       |        |        |        |      |
| 216 | <i>Mengenilla moldrzyki</i> (taxid:1155016)    | No significant similarity found                                                                        |          |       |        |        |        |      |
| 217 | <i>Aedes aegypti</i> (taxid:7159)              | 104 Lc, 104 Ac, 103 Hs, 102 Bf, 101 Sp, 93 Cs, <b>87 Ag</b> , 85 At, 79 Hv, 77 Cv, 75 XI, 68 Dr, 59 Sk | 164      | 61    | 6e-49  | 28.07  | 828    | 1345 |
| 218 | <i>Culex quinquefasciatus</i> (taxid:7176)     | <b>42 Ag</b> , 4 Cv, 4 Bf, 4 Lc, 4 Dr, 4 Cs, 4 Hv, 3 Sp, 3 Sk, 3 XI, 3 Hs, 3 Ac, 3 At                  | 176      | 15    | 6e-49  | 40.09  | 1008   | 1224 |
| 219 | <i>Anopheles albimanus</i> (taxid:7167)        | <b>6 Ac</b> , 3 Sk, 3 Hs                                                                               | 53.5     | 5     | 1e-08  | 28.92  | 733    | 815  |



| No  | Species and taxon identifier                   | # hits from each query (top hit red)                                               | Top hit  |       |        |        |        |      |
|-----|------------------------------------------------|------------------------------------------------------------------------------------|----------|-------|--------|--------|--------|------|
|     |                                                |                                                                                    | bitscore | qcovs | evalue | pident | qstart | qend |
| 220 | <i>Anopheles arabiensis</i> (taxid:7173)       | 3 Lc, 2 Hs, 2 Ac, 1 Cv, 1 Sp, 1 Sk, 1 Xl, 1 Dr, 1 Cs, 1 Hv                         | 72.8     | 10    | 5e-15  | 29.89  | 846    | 1020 |
| 221 | <i>Anopheles atroparvus</i> (taxid:41427)      | No significant similarity found                                                    |          |       |        |        |        |      |
| 222 | <i>Anopheles christyi</i> (taxid:43041)        | No significant similarity found                                                    |          |       |        |        |        |      |
| 223 | <i>Anopheles culicifacies</i> (taxid:139723)   | No significant similarity found                                                    |          |       |        |        |        |      |
| 224 | <i>Anopheles darlingi</i> (taxid:43151)        | No significant similarity found                                                    |          |       |        |        |        |      |
| 225 | <i>Anopheles dirus</i> (taxid:7168)            | No significant similarity found                                                    |          |       |        |        |        |      |
| 226 | <i>Anopheles epiroticus</i> (taxid:199890)     | No significant similarity found                                                    |          |       |        |        |        |      |
| 227 | <i>Anopheles farauti</i> (taxid:69004)         | No significant similarity found                                                    |          |       |        |        |        |      |
| 228 | <i>Anopheles funestus</i> (taxid:62324)        | No significant similarity found                                                    |          |       |        |        |        |      |
| 229 | <i>Anopheles gambiae</i> (taxid:7165)          | 24 Hs, 24 Lc, 22 Ac, 12 Sp, 12 At, 10 Ag, 8 Cv, 8 Bf, 8 Sk, 8 Cs, 6 Xl, 5 Dr, 5 Hv | 818      | 90    | 0.0    | 41.12  | 325    | 1380 |
| 230 | <i>Anopheles maculatus</i> (taxid:74869)       | No significant similarity found                                                    |          |       |        |        |        |      |
| 231 | <i>Anopheles melas</i> (taxid:34690)           | No significant similarity found                                                    |          |       |        |        |        |      |
| 232 | <i>Anopheles merus</i> (taxid:30066)           | 1 Cv, 1 Sp, 1 Bf, 1 Sk, 1 Xl, 1 Hs, 1 Lc, 1 Dr, 1 Cs, 1 Hv, 1 Ac, 1 At             | 78.6     | 18    | 4e-17  | 22.74  | 662    | 955  |
| 233 | <i>Anopheles minimus</i> (taxid:112268)        | No significant similarity found                                                    |          |       |        |        |        |      |
| 234 | <i>Anopheles quadriannulatus</i> (taxid:34691) | No significant similarity found                                                    |          |       |        |        |        |      |
| 235 | <i>Anopheles sinensis</i> (taxid:74873)        | 5 Sp, 5 Lc, 5 Cs, 3 Bf, 3 Xl, 2 Cv, 2 At                                           | 60.5     | 7     | 8e-12  | 28.24  | 907    | 1037 |
| 236 | <i>Anopheles stephensi</i> (taxid:30069)       | 12 Sp, 11 Lc, 10 Hs, 10 Ac, 8 Ag, 6 Xl, 5 Bf, 2 Cv, 2 Cs, 1 Sk, 1 At               | 67.0     | 11    | 1e-13  | 31.34  | 447    | 578  |
| 237 | <i>Mayetiola destructor</i> (taxid:39758)      | 1 Cv, 1 Sp, 1 Bf, 1 Sk, 1 Hs, 1 Dr, 1 Cs, 1 Ac, 1 Ag, 1 At                         | 90.5     | 24    | 2e-19  | 23.42  | 681    | 1052 |
| 238 | <i>Lutzomyia longipalpis</i> (taxid:7200)      | 1 Ac, 1 Sp                                                                         | 50.1     | 5     | 3e-08  | 40.70  | 810    | 892  |

| No  | Species and taxon identifier                   | # hits from each query (top hit red)                                                                              | Top hit  |       |        |        |        |      |
|-----|------------------------------------------------|-------------------------------------------------------------------------------------------------------------------|----------|-------|--------|--------|--------|------|
|     |                                                |                                                                                                                   | bitscore | qcovs | evalue | pident | qstart | qend |
| 239 | <i>Phlebotomus papatasi</i><br>(taxid:29031)   | 11 Ac, <b>10 Lc</b> , 10 Ag, 9 Bf, 9 Hs, 8 Sp, 8 Xl, 7 Sk, 7 Cs, 6 Dr, 6 Hv, 6 At, 2 Cv                           | 136      | 23    | 5e-33  | 30.48  | 839    | 1197 |
| 240 | <i>Ceratitis capitata</i><br>(taxid:7213)      | 3 Sp, 3 Sk, 3 Hs, <b>3 Ac</b> , 3 Ag, 2 Bf, 2 Lc, 1 Xl, 1 Dr, 1 Cs, 1 Hv, 1 At                                    | 81.6     | 14    | 6e-15  | 30.90  | 724    | 951  |
| 241 | <i>Drosophila albomicans</i><br>(taxid:7291)   | No significant similarity found                                                                                   |          |       |        |        |        |      |
| 242 | <i>Drosophila ananassae</i><br>(taxid:7217)    | 27 Cs, 25 Hs, 25 Lc, 25 Ac, 24 Cv, 24 Sp, 24 Sk, 24 Xl, 24 Dr, <b>24 Hv</b> , 24 At, 23 Bf, 23 Ag                 | 116      | 26    | 5e-26  | 26.52  | 783    | 1181 |
| 243 | <i>Drosophila biarmipes</i><br>(taxid:125945)  | No significant similarity found                                                                                   |          |       |        |        |        |      |
| 244 | <i>Drosophila bipectinata</i><br>(taxid:42026) | No significant similarity found                                                                                   |          |       |        |        |        |      |
| 245 | <i>Drosophila elegans</i><br>(taxid:30023)     | No significant similarity found                                                                                   |          |       |        |        |        |      |
| 246 | <i>Drosophila erecta</i><br>(taxid:7220)       | No significant similarity found                                                                                   |          |       |        |        |        |      |
| 247 | <i>Drosophila eugracilis</i><br>(taxid:29029)  | No significant similarity found                                                                                   |          |       |        |        |        |      |
| 248 | <i>Drosophila ficusphila</i><br>(taxid:30025)  | No significant similarity found                                                                                   |          |       |        |        |        |      |
| 249 | <i>Drosophila grimshawi</i><br>(taxid:7222)    | No significant similarity found                                                                                   |          |       |        |        |        |      |
| 250 | <i>Drosophila kikkawai</i><br>(taxid:30033)    | No significant similarity found                                                                                   |          |       |        |        |        |      |
| 251 | <i>Drosophila melanogaster</i><br>(taxid:7227) | 1886 Ac, <b>1537 Hs</b> , 1511 Lc, 518 Sp, 487 Cs, 353 Ag, 279 Bf, 208 Cv, 187 Dr, 185 Xl, 173 Sk, 148 At, 107 Hv | 151      | 33    | 2e-63  | 45.27  | 468    | 708  |
| 252 | <i>Drosophila miranda</i><br>(taxid:7229)      | <b>26 Ac</b> , 21 Lc, 19 Hs, 19 Cs, 15 Sp, 15 Sk, 15 At, 14 Bf, 12 Cv, 12 Dr, 11 Xl, 10 Ag, 9 Hv                  | 104      | 28    | 8e-23  | 25.60  | 611    | 1056 |
| 253 | <i>Drosophila mojavensis</i><br>(taxid:7230)   | No significant similarity found                                                                                   |          |       |        |        |        |      |
| 254 | <i>Drosophila persimilis</i><br>(taxid:7234)   | 2 Ac, <b>1 Hs</b>                                                                                                 | 53.1     | 11    | 1e-06  | 22.83  | 790    | 973  |

| No  | Species and taxon identifier                                             | # hits from each query (top hit red)                                                    | Top hit  |       |        |        |        |      |
|-----|--------------------------------------------------------------------------|-----------------------------------------------------------------------------------------|----------|-------|--------|--------|--------|------|
|     |                                                                          |                                                                                         | bitscore | qcovs | evalue | pident | qstart | qend |
| 255 | <i>Drosophila pseudoobscura</i><br><i>pseudoobscura</i><br>(taxid:46245) | No significant similarity found                                                         |          |       |        |        |        |      |
| 256 | <i>Drosophila rhopaloa</i><br>(taxid:1041015)                            | No significant similarity found                                                         |          |       |        |        |        |      |
| 257 | <i>Drosophila sechellia</i><br>(taxid:7238)                              | 9 Ac, 8 Hs, 5 Lc, 3 Cs, 1 Cv, 1 Bf                                                      | 107      | 21    | 3e-23  | 29.94  | 730    | 1056 |
| 258 | <i>Drosophila simulans</i><br>(taxid:7240)                               | 8 Hs, 8 Ac, 7 Lc, 4 Cs, 3 Sk, 3 Ag, 2 Cv, 2 Bf, 2 Dr, 1 Sp, 1 At                        | 105      | 21    | 2e-22  | 30.52  | 730    | 1056 |
| 259 | <i>Drosophila suzukii</i><br>(taxid:28584)                               | No significant similarity found                                                         |          |       |        |        |        |      |
| 260 | <i>Drosophila takahashii</i><br>(taxid:29030)                            | No significant similarity found                                                         |          |       |        |        |        |      |
| 261 | <i>Drosophila virilis</i><br>(taxid:7244)                                | 10 Ac, 9 Hs, 7 Lc, 3 Cv, 3 Sp, 3 Cs, 3 Ag, 2 Bf, 2 Sk, 2 Dr, 2 At                       | 100      | 22    | 1e-20  | 26.93  | 743    | 1112 |
| 262 | <i>Drosophila willistoni</i><br>(taxid:7260)                             | 2 Sp, 2 Sk, 2 Xl, 2 Lc, 2 Dr, 2 Cs, 2 Hv, 2 Ac, 2 Ag, 1 Cv, 1 Bf, 1 Hs, 1 At            | 118      | 41    | 8e-27  | 23.66  | 447    | 1114 |
| 263 | <i>Drosophila yakuba</i><br>(taxid:7245)                                 | 8 Hs, 8 Ac, 7 Lc, 6 Cs, 4 Ag, 2 Bf, 1 At                                                | 105      | 18    | 4e-22  | 29.80  | 730    | 1017 |
| 264 | <i>Musca domestica</i><br>(taxid:7370)                                   | 19 Hs, 10 Lc, 6 Ac, 6 Ag, 4 Xl, 2 Bf, 2 Cs, 2 Hv                                        | 78.2     | 20    | 4e-14  | 27.41  | 748    | 1063 |
| 265 | <i>Glossina austeni</i><br>(taxid:7395)                                  | No significant similarity found                                                         |          |       |        |        |        |      |
| 266 | <i>Glossina brevipalpis</i><br>(taxid:37001)                             | No significant similarity found                                                         |          |       |        |        |        |      |
| 267 | <i>Glossina fuscipes fuscipes</i><br>(taxid:201502)                      | No significant similarity found                                                         |          |       |        |        |        |      |
| 268 | <i>Glossina morsitans morsitans</i><br>(taxid:37546)                     | No significant similarity found                                                         |          |       |        |        |        |      |
| 269 | <i>Glossina pallidipes</i><br>(taxid:7398)                               | No significant similarity found                                                         |          |       |        |        |        |      |
| 270 | <i>Limnephilus lunatus</i><br>(taxid:1218281)                            | No significant similarity found                                                         |          |       |        |        |        |      |
| 271 | <i>Papilio glaucus</i><br>(taxid:45779)                                  | No significant similarity found                                                         |          |       |        |        |        |      |
| 272 | <i>Papilio polytes</i><br>(taxid:76194)                                  | 9 Ac, 7 Lc, 7 At, 6 Xl, 6 Hs, 6 Cs, 5 Sp, 5 Sk, 5 Dr, 5 Ag, 3 Bf, 3 Hv, 2 Cv            | 144      | 35    | 1e-34  | 28.23  | 252    | 665  |
| 273 | <i>Papilio xuthus</i><br>(taxid:66420)                                   | 36 Hs, 33 Ac, 29 Lc, 25 At, 24 Sp, 19 Sk, 18 Xl, 18 Hv, 17 Cv, 17 Cs, 16 Ag, 9 Bf, 7 Dr | 110      | 18    | 3e-24  | 31.60  | 781    | 1065 |

| No  | Species and taxon identifier                         | # hits from each query (top hit red)                                                                           | Top hit  |       |        |        |        |      |
|-----|------------------------------------------------------|----------------------------------------------------------------------------------------------------------------|----------|-------|--------|--------|--------|------|
|     |                                                      |                                                                                                                | bitscore | qcovs | evalue | pident | qstart | qend |
| 274 | <i>Heliconius melpomene melpomene</i> (taxid:171917) | No significant similarity found                                                                                |          |       |        |        |        |      |
| 275 | <i>Melitaea cinxia</i> (taxid:113334)                | No significant similarity found                                                                                |          |       |        |        |        |      |
| 276 | <i>Danaus plexippus</i> (taxid:13037)                | No significant similarity found                                                                                |          |       |        |        |        |      |
| 277 | <i>Bombyx mori</i> (taxid:7091)                      | 322 Ac, 311 Lc, <b>310 Hs</b> , 262 Cs, 232 Sp, 221 Ag, 214 Sk, 204 Cv, 185 At, 162 Xl, 157 Bf, 135 Dr, 110 Hv | 184      | 40    | 2e-46  | 27.58  | 448    | 1093 |
| 278 | <i>Manduca sexta</i> (taxid:7130)                    | 3 Hs, 3 Lc, 3 Ac, <b>2 Sp</b> , 2 Sk, 2 Cs, 2 At, 1 Cv, 1 Bf, 1 Xl, 1 Dr, 1 Hv, 1 Ag                           | 92.0     | 37    | 3e-23  | 28.91  | 438    | 693  |
| 279 | <i>Plutella xylostella</i> (taxid:51655)             | 74 Ac, <b>72 Hs</b> , 69 Lc, 57 Sp, 55 Bf, 55 At, 54 Ag, 44 Cs, 41 Sk, 40 Cv, 40 Xl, 33 Dr, 30 Hv              | 138      | 45    | 2e-32  | 22.06  | 352    | 1077 |
| 280 | <i>Athalia rosae</i> (taxid:37344)                   | 2 Ac, 1 Cv, 1 Sp, 1 Bf, 1 Hs, <b>1 Lc</b> , 1 Hv, 1 Ag, 1 At                                                   | 100      | 18    | 8e-21  | 27.22  | 845    | 1151 |
| 281 | <i>Cephus cinctus</i> (taxid:211228)                 | 18 Lc, <b>17 Ac</b> , 14 Hs, 14 At, 13 Ag, 12 Sk, 4 Cs, 3 Xl, 2 Sp, 2 Bf, 1 Dr                                 | 88.2     | 16    | 5e-17  | 29.28  | 729    | 989  |
| 282 | <i>Orussus abietinus</i> (taxid:222816)              | 4 Hs, <b>4 Ac</b> , 3 Lc, 2 Sp, 2 Sk, 2 Xl, 2 Cs, 2 Hv, 2 Ag, 2 At, 1 Cv, 1 Bf, 1 Dr                           | 95.5     | 19    | 2e-19  | 25.78  | 728    | 1029 |
| 283 | <i>Ceratosolen solmsi marchali</i> (taxid:326594)    | 1 Bf, <b>1 Hs</b>                                                                                              | 74.7     | 14    | 3e-18  | 26.54  | 341    | 571  |
| 284 | <i>Nasonia giraulti</i> (taxid:7426)                 | No significant similarity found                                                                                |          |       |        |        |        |      |
| 285 | <i>Nasonia longicornis</i> (taxid:7427)              | No significant similarity found                                                                                |          |       |        |        |        |      |
| 286 | <i>Nasonia vitripennis</i> (taxid:7425)              | 31 Ac, 28 Bf, 24 Lc, <b>22 Hs</b> , 20 Cs, 19 Sp, 19 At, 15 Hv, 14 Cv, 14 Dr, 13 Sk, 12 Xl, 11 Ag              | 114      | 29    | 5e-25  | 24.59  | 743    | 1210 |
| 287 | <i>Copidosoma floridanum</i> (taxid:29053)           | 15 Lc, 14 Cs, 13 Sp, <b>13 Ac</b> , 11 Ag, 9 Dr, 8 Bf, 8 Xl, 8 Hs, 7 Hv, 7 At, 6 Sk, 4 Cv                      | 106      | 21    | 2e-23  | 26.57  | 719    | 1050 |
| 288 | <i>Trichogramma pretiosum</i> (taxid:7493)           | 16 Hs, 13 Ac, 11 Sp, 11 Lc, 10 Ag, 7 Sk, 5 Xl, <b>4 Cs</b> , 3 Bf, 3 Dr, 3 At, 1 Cv, 1 Hv                      | 120      | 17    | 7e-27  | 27.05  | 919    | 1208 |
| 289 | <i>Microplitis demolitor</i> (taxid:69319)           | 14 Sp, 13 Cs, 13 Ac, 11 Bf, <b>11 Hs</b> , 9 Sk, 8 Lc, 8 Ag, 6 Dr, 5 Cv, 5 Xl, 3 Hv, 3 At                      | 114      | 20    | 3e-25  | 28.91  | 786    | 1112 |

| No  | Species and taxon identifier                     | # hits from each query (top hit red)                                                          | Top hit  |       |        |        |        |      |
|-----|--------------------------------------------------|-----------------------------------------------------------------------------------------------|----------|-------|--------|--------|--------|------|
|     |                                                  |                                                                                               | bitscore | qcovs | evalue | pident | qstart | qend |
| 290 | <i>Megachile rotundata</i><br>(taxid:143995)     | 10 Ac, <b>9 Hs</b> , 6 Lc, 5 Cs, 4 Sp, 4 Xl, 3 At, 2 Cv, 1 Bf, 1 Sk, 1 Hv                     | 97.1     | 17    | 1e-19  | 26.82  | 787    | 1074 |
| 291 | <i>Apis dorsata</i><br>(taxid:7462)              | No significant similarity found                                                               |          |       |        |        |        |      |
| 292 | <i>Apis florea</i><br>(taxid:7463)               | No significant similarity found                                                               |          |       |        |        |        |      |
| 293 | <i>Apis mellifera</i><br>(taxid:7460)            | <b>1 Ac</b>                                                                                   | 60.8     | 7     | 2e-08  | 33.07  | 736    | 856  |
| 294 | <i>Bombus impatiens</i><br>(taxid:132113)        | <b>4 Ac</b> , 1 Cv, 1 Sp, 1 Bf, 1 Sk, 1 Xl, 1 Hs, 1 Lc, 1 Dr, 1 Cs, 1 Hv, 1 Ag, 1 At          | 103      | 14    | 1e-22  | 29.39  | 733    | 959  |
| 295 | <i>Bombus terrestris</i><br>(taxid:30195)        | 10 Hs, 9 Lc, 4 Xl, <b>4 Ac</b> , 3 Sp, 3 Ag, 2 Dr, 2 Cs, 1 Cv                                 | 79.7     | 10    | 2e-17  | 31.87  | 732    | 889  |
| 296 | <i>Linepithema humile</i><br>(taxid:83485)       | 11 Hs, <b>7 Ac</b> , 7 At, 6 Lc, 3 Cs, 2 Sp, 2 Bf, 2 Sk, 2 Xl, 2 Ag, 1 Cv, 1 Dr, 1 Hv         | 89.0     | 18    | 2e-17  | 27.36  | 777    | 1063 |
| 297 | <i>Camponotus floridanus</i><br>(taxid:104421)   | <b>7 Ac</b> , 6 Lc, 5 Hs, 5 Cs, 4 Bf, 3 Sp, 3 Xl, 3 At, 1 Cv, 1 Sk, 1 Dr, 1 Hv, 1 Ag          | 87.0     | 20    | 1e-16  | 22.75  | 733    | 1052 |
| 298 | <i>Acromyrmex echinator</i><br>(taxid:103372)    | 6 Hs, <b>5 Lc</b> , 4 Ac, 2 At, 1 Hv                                                          | 73.9     | 17    | 7e-13  | 25.68  | 847    | 1129 |
| 299 | <i>Atta cephalotes</i><br>(taxid:12957)          | <b>1 Hs</b>                                                                                   | 57.4     | 14    | 3e-08  | 23.05  | 341    | 577  |
| 300 | <i>Solenopsis invicta</i><br>(taxid:13686)       | 32 Ac, 24 Hs, 19 Xl, <b>18 Lc</b> , 16 Sp, 16 Dr, 11 Ag, 11 At, 10 Cs, 9 Hv, 8 Bf, 5 Sk, 1 Cv | 108      | 17    | 2e-23  | 30.85  | 822    | 1101 |
| 301 | <i>Pogonomyrmex barbatus</i><br>(taxid:144034)   | <b>6 Ac</b> , 5 Sp, 5 Xl, 5 Cs, 3 Bf, 3 Hs, 3 Lc, 3 Ag, 2 Cv, 1 Dr                            | 85.1     | 20    | 4e-16  | 23.75  | 733    | 1057 |
| 302 | <i>Harpegnathos saltator</i><br>(taxid:610380)   | 18 Hs, 13 Lc, <b>10 Ac</b> , 7 At, 5 Cv, 3 Ag, 1 Sp, 1 Bf, 1 Sk, 1 Xl, 1 Dr                   | 99.0     | 20    | 2e-20  | 23.53  | 725    | 1048 |
| 303 | <i>Cerapachys biroi</i><br>(taxid:443821)        | 13 Hs, <b>8 Ac</b> , 6 Lc, 5 Bf, 5 Cs, 4 Sk, 4 Ag, 4 At, 3 Cv, 3 Sp, 3 Xl, 2 Dr, 2 Hv         | 122      | 23    | 2e-27  | 27.42  | 653    | 1020 |
| 304 | <i>Blattella germanica</i><br>(taxid:6973)       | 5 Lc, 5 Ac, 4 Cs, 3 Bf, 3 Hs, 3 Dr, 3 Hv, <b>3 Ag</b> , 3 At, 2 Cv, 2 Sp, 2 Sk, 2 Xl          | 380      | 84    | 2e-110 | 29.01  | 335    | 1337 |
| 305 | <i>Zootermopsis nevadensis</i><br>(taxid:136037) | No significant similarity found                                                               |          |       |        |        |        |      |
| 306 | <i>Daphnia pulex</i><br>(taxid:6669)             | 5 Sp, 5 Hs, 5 Lc, 5 Cs, 5 Ag, 4 Cv, 4 Sk, 4 Xl, 4 Dr, 4 Ac, 3 Bf, 3 At, <b>2 Hv</b>           | 239      | 56    | 8e-66  | 25.61  | 345    | 1197 |
| 307 | <i>Eurytemora affinis</i><br>(taxid:88015)       | No significant similarity found                                                               |          |       |        |        |        |      |

| No  | Species and taxon identifier                         | # hits from each query (top hit red)                                                              | Top hit  |       |        |        |        |      |
|-----|------------------------------------------------------|---------------------------------------------------------------------------------------------------|----------|-------|--------|--------|--------|------|
|     |                                                      |                                                                                                   | bitscore | qcovs | evalue | pident | qstart | qend |
| 308 | <i>Hyalella azteca</i><br>(taxid:294128)             | No significant similarity found                                                                   |          |       |        |        |        |      |
| 309 | <i>Strigamia maritima</i><br>(taxid:126957)          | No significant similarity found                                                                   |          |       |        |        |        |      |
| 310 | <i>Stegodyphus mimosarum</i><br>(taxid:407821)       | No significant similarity found                                                                   |          |       |        |        |        |      |
| 311 | <i>Latrodectus hesperus</i><br>(taxid:256737)        | 5 Lc, <b>4 Hs</b> , 3 Ac, 2 Xl, 2 Ag, 1 Dr, 1 Cs, 1 Hv, 1 At                                      | 84.3     | 21    | 9e-18  | 25.62  | 790    | 1140 |
| 312 | <i>Parasteatoda tepidariorum</i><br>(taxid:114398)   | No significant similarity found                                                                   |          |       |        |        |        |      |
| 313 | <i>Tetranychus urticae</i><br>(taxid:32264)          | No significant similarity found                                                                   |          |       |        |        |        |      |
| 314 | <i>Dermatophagoides farinae</i><br>(taxid:6954)      | No significant similarity found                                                                   |          |       |        |        |        |      |
| 315 | <i>Sarcoptes scabiei type canis</i><br>(taxid:52283) | No significant similarity found                                                                   |          |       |        |        |        |      |
| 316 | <i>Achipteria coleoptrata</i><br>(taxid:229769)      | No significant similarity found                                                                   |          |       |        |        |        |      |
| 317 | <i>Hypochothonius rufulus</i><br>(taxid:66581)       | No significant similarity found                                                                   |          |       |        |        |        |      |
| 318 | <i>Platynocheilus peltifer</i><br>(taxid:128015)     | No significant similarity found                                                                   |          |       |        |        |        |      |
| 319 | <i>Steganacarus magnus</i><br>(taxid:52000)          | No significant similarity found                                                                   |          |       |        |        |        |      |
| 320 | <i>Ixodes ricinus</i><br>(taxid:34613)               | No significant similarity found                                                                   |          |       |        |        |        |      |
| 321 | <i>Ixodes scapularis</i><br>(taxid:6945)             | 99 Sp, 93 Lc, 86 Hs, 85 Ac, 76 Ag, 72 Cs, 69 Bf, 55 Sk, 54 Dr, 53 Cv, 47 Xl, 47 At, <b>33 Hv</b>  | 318      | 69    | 6e-88  | 26.27  | 339    | 1395 |
| 322 | <i>Rhipicephalus microplus</i><br>(taxid:6941)       | 30 Ac, 29 Sp, 27 Sk, <b>27 Hs</b> , 25 Cs, 24 Bf, 23 Lc, 21 Xl, 21 Ag, 18 Dr, 14 Hv, 13 At, 12 Cv | 150      | 46    | 3e-37  | 24.42  | 367    | 1112 |
| 323 | <i>Metaseiulus occidentalis</i><br>(taxid:34638)     | <b>16 Ac</b> , 13 Hs, 10 Cs, 10 At, 9 Lc, 8 Bf, 7 Cv, 7 Sp, 7 Sk, 6 Xl, 5 Hv, 3 Ag, 2 Dr          | 123      | 25    | 1e-28  | 26.56  | 660    | 1057 |
| 324 | <i>Varroa destructor</i><br>(taxid:109461)           | No significant similarity found                                                                   |          |       |        |        |        |      |

| No  | Species and taxon identifier                          | # hits from each query (top hit red)                                                                 | Top hit  |       |        |        |        |      |
|-----|-------------------------------------------------------|------------------------------------------------------------------------------------------------------|----------|-------|--------|--------|--------|------|
|     |                                                       |                                                                                                      | bitscore | qcovs | evalue | pident | qstart | qend |
| 325 | <i>Centruroides exilicauda</i><br>(taxid:6879)        | 1 Sk, 1 Xl, 1 Hs, 1 Lc, 1 Ac, 1 At                                                                   | 60.5     | 8     | 4e-13  | 33.33  | 830    | 962  |
| 326 | <i>Mesobuthus martensii</i><br>(taxid:34649)          | No significant similarity found                                                                      |          |       |        |        |        |      |
| 327 | <i>Limulus polyphemus</i><br>(taxid:6850)             | 8 Ac, 6 Lc, 6 Dr, 6 Hv, 5 Sp, 5 Xl, 5 Hs, 5 Ag, 3 Cv, 3 Sk, 3 Cs, 3 At, 2 Bf                         | 365      | 51    | 2e-102 | 30.19  | 438    | 1280 |
| 328 | <i>Trichinella spiralis</i><br>(taxid:6334)           | 11 Xl, 9 Sp, 9 Ac, 8 Sk, 8 Cs, 7 Bf, 7 Lc, 7 Hv, 6 Ag, 5 Dr, 3 Hs, 1 Cv, 1 At                        | 98.2     | 20    | 1e-20  | 25.32  | 1207   | 1637 |
| 329 | <i>Ascaris suum</i><br>(taxid:6253)                   | 1 Cv, 1 Bf, 1 Sk, 1 Xl, 1 Hs, 1 Cs, 1 Ac, 1 At                                                       | 58.2     | 9     | 9e-10  | 26.04  | 1042   | 1210 |
| 330 | <i>Elaeophora elaphi</i><br>(taxid:1147741)           | No significant similarity found                                                                      |          |       |        |        |        |      |
| 331 | <i>Onchocerca volvulus</i><br>(taxid:6282)            | No significant similarity found                                                                      |          |       |        |        |        |      |
| 332 | <i>Steinernema monticolum</i><br>(taxid:90984)        | No significant similarity found                                                                      |          |       |        |        |        |      |
| 333 | <i>Panagrellus redivivus</i><br>(taxid:6233)          | No significant similarity found                                                                      |          |       |        |        |        |      |
| 334 | <i>Haemonchus contortus</i><br>(taxid:6289)           | No significant similarity found                                                                      |          |       |        |        |        |      |
| 335 | <i>Necator americanus</i><br>(taxid:51031)            | 51 Lc, 46 Xl, 44 Sp, 44 Hs, 43 Bf, 43 Sk, 42 Dr, 41 Ac, 39 Hv, 37 Ag, 35 Cv, 33 Cs, 31 At            | 110      | 20    | 3e-25  | 25.15  | 816    | 1153 |
| 336 | <i>Heterorhabditis bacteriophora</i><br>(taxid:37862) | No significant similarity found                                                                      |          |       |        |        |        |      |
| 337 | <i>Caenorhabditis angaria</i><br>(taxid:860376)       | No significant similarity found                                                                      |          |       |        |        |        |      |
| 338 | <i>Caenorhabditis brenneri</i><br>(taxid:135651)      | No significant similarity found                                                                      |          |       |        |        |        |      |
| 339 | <i>Caenorhabditis briggsae</i><br>(taxid:6238)        | 14 Sp, 11 Lc, 9 Bf, 9 Sk, 8 Ac, 7 Cv, 7 Xl, 7 Cs, 6 Hs, 6 At, 5 Ag, 2 Dr, 2 Hv                       | 79.7     | 17    | 1e-14  | 25.44  | 749    | 1021 |
| 340 | <i>Caenorhabditis elegans</i><br>(taxid:6239)         | 196 Lc, 192 Hs, 191 Ac, 184 Sp, 152 Cs, 147 Bf, 129 Ag, 122 Sk, 122 At, 102 Xl, 101 Cv, 98 Dr, 94 Hv | 1258     | 39    | 0.0    | 95.89  | 1      | 635  |

| No                     | Species and taxon identifier                             | # hits from each query (top hit red)                                                                                | Top hit  |       |        |        |        |      |
|------------------------|----------------------------------------------------------|---------------------------------------------------------------------------------------------------------------------|----------|-------|--------|--------|--------|------|
|                        |                                                          |                                                                                                                     | bitscore | qcovs | evalue | pident | qstart | qend |
| 341                    | <i>Caenorhabditis japonica</i><br>(taxid:281687)         | 7 Bf, 6 Cv, 6 Lc, 6 Cs, 6 At, 5 Sp, 5 Sk, 5 Hs, 5 Ac, 5 Ag, 4 Hv, 3 Dr, 2 Xl                                        | 122      | 25    | 7e-29  | 29.47  | 677    | 1049 |
| 342                    | <i>Caenorhabditis sp. 11 MAF-2010</i><br>(taxid:1561998) | No significant similarity found                                                                                     |          |       |        |        |        |      |
| 343                    | <i>Priapulius caudatus</i><br>(taxid:37621)              | 8 Sp, 8 Ac, 7 Bf, 7 Hs, 6 Sk, 6 Lc, 6 Cs, 5 Dr, 5 Ag, 4 Cv, 4 Xl, 4 At, 3 Hv                                        | 114      | 47    | 3e-25  | 23.53  | 349    | 1115 |
| <b>ROTIFERA</b>        |                                                          |                                                                                                                     |          |       |        |        |        |      |
| 344                    | <i>Adineta vaga</i><br>(taxid:104782)                    | 18 Sp, 18 Xl, 18 Hs, 18 Lc, 18 Cs, 18 Hv, 18 Ac, 18 Ag, 18 At, 13 Dr, 5 Cv, 5 Sk, 4 Bf                              | 110      | 28    | 4e-25  | 24.52  | 809    | 1275 |
| <b>PLATYHELMINTHES</b> |                                                          |                                                                                                                     |          |       |        |        |        |      |
| 345                    | <i>Schistosoma curassoni</i><br>(taxid:6186)             | 600 Sp, 592 Ac, 585 At, 576 Hs, 574 Hv, 573 Cs, 571 Lc, 570 Dr, 560 Sk, 548 Bf, 540 Xl, 536 Cv, 530 Ag              | 120      | 17    | 4e-26  | 29.29  | 750    | 1025 |
| 346                    | <i>Schistosoma haematobium</i><br>(taxid:6185)           | 4 Sp, 4 Lc, 3 Bf, 3 Sk, 3 Xl, 3 Hs, 2 Hv, 2 Ac, 2 Ag, 1 Cs                                                          | 65.1     | 6     | 5e-12  | 39.19  | 512    | 585  |
| 347                    | <i>Schistosoma japonicum</i><br>(taxid:6182)             | 54 Sp, 52 Hs, 50 Ac, 48 Hv, 47 Cs, 46 Bf, 43 Xl, 43 Dr, 42 Lc, 41 Sk, 37 At, 36 Ag, 31 Cv                           | 149      | 45    | 5e-36  | 22.61  | 344    | 1080 |
| 348                    | <i>Schistosoma mansoni</i><br>(taxid:6183)               | 5010 Sp, 4703 Hs, 4391 Ac, 4193 Lc, 3951 Hv, 3892 Bf, 3801 Sk, 3770 Cs, 3571 Dr, 3554 Xl, 3313 At, 3170 Cv, 3140 Ag | 143      | 52    | 5e-33  | 23.60  | 348    | 1011 |
| 349                    | <i>Schistosoma margrebowiei</i><br>(taxid:48269)         | 1017 Sp, 901 Hs, 872 Lc, 853 At, 850 Hv, 843 Ac, 825 Cs, 821 Bf, 784 Sk, 754 Dr, 749 Cv, 747 Xl, 705 Ag             | 142      | 46    | 1e-32  | 22.46  | 333    | 1080 |
| 350                    | <i>Schistosoma mattheei</i><br>(taxid:31246)             | 602 Sp, 600 Ac, 581 Dr, 580 Sk, 578 Hs, 574 Cs, 574 Hv, 572 Lc, 560 Bf, 547 Xl, 520 Ag, 482 At, 366 Cv              | 376      | 49    | 3e-109 | 57.84  | 1053   | 1339 |
| 351                    | <i>Schistosoma rodhaini</i><br>(taxid:6188)              | 627 Sp, 608 Ac, 602 Hs, 602 Lc, 592 At, 591 Cs, 587 Hv, 586 Sk, 573 Dr, 559 Xl, 535 Bf, 517 Cv, 513 Ag              | 723      | 45    | 0.0    | 63.60  | 509    | 1057 |
| 352                    | <i>Clonorchis sinensis</i><br>(taxid:79923)              | No significant similarity found                                                                                     |          |       |        |        |        |      |



| No                 | Species and taxon identifier                       | # hits from each query (top hit red)                                                       | Top hit  |       |        |        |        |      |
|--------------------|----------------------------------------------------|--------------------------------------------------------------------------------------------|----------|-------|--------|--------|--------|------|
|                    |                                                    |                                                                                            | bitscore | qcovs | evalue | pident | qstart | qend |
| 353                | <i>Echinococcus granulosis</i><br>(taxid:6210)     | No significant similarity found                                                            |          |       |        |        |        |      |
| 354                | <i>Echinococcus multilocularis</i><br>(taxid:6211) | No significant similarity found                                                            |          |       |        |        |        |      |
| 355                | <i>Hymenolepis microstoma</i><br>(taxid:85433)     | No significant similarity found                                                            |          |       |        |        |        |      |
| <b>ANNELIDA</b>    |                                                    |                                                                                            |          |       |        |        |        |      |
| 356                | <i>Capitella teleta</i><br>(taxid:283909)          | 1 Dr                                                                                       | 43.1     | 1     | 5e-06  | 41.46  | 238    | 269  |
| 357                | <i>Helobdella robusta</i><br>(taxid:6412)          | 23 Hs, 17 Lc, 17 Ac, 15 Cs, 14 Cv, 14 Bf, 12 At, 10 Sp, 9 Xl, 9 Ag, 7 Sk, 6 Dr, 6 Hv       | 95.9     | 26    | 2e-19  | 21.36  | 611    | 1020 |
| <b>MOLLUSCA</b>    |                                                    |                                                                                            |          |       |        |        |        |      |
| 358                | <i>Crassostrea gigas</i><br>(taxid:29159)          | 69 Bf, 64 Sp, 50 Hs, 46 Cs, 45 Dr, 44 Hv, 44 Ac, 40 Sk, 38 Lc, 36 Cv, 35 Xl, 35 Ag, 33 At  | 481      | 73    | 4e-138 | 29.58  | 405    | 1610 |
| 359                | <i>Lottia gigantea</i><br>(taxid:225164)           | 58 Dr, 16 Bf, 15 Hs, 15 Hv, 11 Xl, 11 Lc, 10 Sp, 10 Sk, 10 Ac, 7 Cs, 6 Cv, 2 Ag, 1 At      | 169      | 12    | 1e-46  | 39.25  | 74     | 286  |
| 360                | <i>Aplysia californica</i><br>(taxid:6500)         | 46 Ac, 44 Hs, 41 Sp, 38 Lc, 36 Cs, 35 Bf, 30 Sk, 30 Xl, 29 Dr, 29 Ag, 22 Hv, 14 Cv, 13 At  | 302      | 29    | 9e-85  | 37.76  | 405    | 885  |
| 361                | <i>Biomphalaria glabrata</i><br>(taxid:6526)       | 47 Lc, 47 Ac, 43 Hs, 35 Sp, 34 Cs, 29 Sk, 28 Bf, 26 Hv, 24 Xl, 24 Ag, 21 At, 20 Cv, 19 Dr  | 338      | 62    | 1e-93  | 28.75  | 344    | 1289 |
| <b>CNIDARIA</b>    |                                                    |                                                                                            |          |       |        |        |        |      |
| 362                | <i>Nematostella vectensis</i><br>(taxid:45351)     | 11 Dr, 9 Hs, 7 Ac, 6 Sp, 5 Sk, 5 Xl, 4 Bf, 4 Lc, 4 Hv, 3 Cv, 3 Cs, 1 Ag, 1 At              | 164      | 21    | 1e-43  | 30.77  | 346    | 674  |
| 363                | <i>Hydra vulgaris</i><br>(taxid:6087)              | 100 Sp, 95 Bf, 91 Lc, 90 Ac, 84 Cs, 80 Hs, 60 Cv, 56 Sk, 55 Xl, 37 Hv, 32 Dr, 25 Ag, 14 At | 182      | 11    | 8e-48  | 81.82  | 642    | 760  |
| <b>TENTACULATA</b> |                                                    |                                                                                            |          |       |        |        |        |      |
| 364                | <i>Mnemiopsis leidyi</i><br>(taxid:27923)          | 2 Sp, 2 Bf, 2 Sk, 2 Hs, 2 Lc, 2 Cs, 2 Ac, 2 Ag, 1 Cv, 1 Xl, 1 Dr, 1 Hv                     | 96.3     | 23    | 2e-21  | 24.67  | 725    | 1098 |
| <b>PLACOZOA</b>    |                                                    |                                                                                            |          |       |        |        |        |      |
| 365                | <i>Trichoplax adhaerens</i><br>(taxid:10228)       | No significant similarity found                                                            |          |       |        |        |        |      |

| No                   | Species and taxon identifier                              | # hits from each query (top hit red)                                                               | Top hit  |       |        |        |        |      |
|----------------------|-----------------------------------------------------------|----------------------------------------------------------------------------------------------------|----------|-------|--------|--------|--------|------|
|                      |                                                           |                                                                                                    | bitscore | qcovs | evalue | pident | qstart | qend |
| <b>PORIFERA</b>      |                                                           |                                                                                                    |          |       |        |        |        |      |
| 366                  | <i>Amphimedon queenslandica</i><br>(taxid:400682)         | 6 Bf, 6 Hs, 5 Cv, 5 Sp, 5 Lc, 5 Dr, 5 Cs, <b>5 Ac</b> , 2 Hv, 2 At, 1 Ag                           | 95.9     | 19    | 5e-20  | 24.84  | 723    | 1028 |
| <b>VIRIDIPLANTAE</b> |                                                           |                                                                                                    |          |       |        |        |        |      |
| 367                  | <i>Micromonas pusilla</i> CCMP1545<br>(taxid:564608)      | <b>1 Bf</b>                                                                                        | 48.9     | 2     | 1e-05  | 50.00  | 201    | 242  |
| 368                  | <i>Micromonas</i> sp. RCC299<br>(taxid:296587)            | No significant similarity found                                                                    |          |       |        |        |        |      |
| 369                  | <i>Ostreococcus lucimarinus</i> CCE9901<br>(taxid:436017) | <b>1 Dr</b>                                                                                        | 47.4     | 1     | 8e-06  | 52.94  | 238    | 269  |
| 370                  | <i>Ostreococcus tauri</i><br>(taxid:70448)                | <b>1 Dr</b>                                                                                        | 47.8     | 2     | 8e-06  | 48.65  | 238    | 272  |
| 371                  | <i>Chlamydomonas reinhardtii</i><br>(taxid:3055)          | 7 Sp, 7 Xl, 7 Lc, <b>7 Hv</b> , 6 Cv, 6 Sk, 6 Cs, 5 Bf, 4 Hs, 4 Ac, 4 Ag, 4 At, 3 Dr               | 164      | 34    | 4e-40  | 28.16  | 698    | 1219 |
| 372                  | <i>Volvox carteri</i> f. nagariensis<br>(taxid:3068)      | 51 Sk, 50 Hs, <b>50 Hv</b> , 47 Xl, 47 Cs, 46 Lc, 45 Sp, 45 Ac, 41 Bf, 41 At, 40 Dr, 40 Ag, 32 Cv  | 258      | 57    | 5e-69  | 25.29  | 344    | 1208 |
| 373                  | <i>Chlorella variabilis</i><br>(taxid:554065)             | 6 Ac, 4 Sp, 4 Bf, <b>4 Hs</b> , 4 Lc, 4 Dr, 4 Hv, 4 Ag, 3 Cs, 2 Cv, 2 Sk, 2 Xl, 2 At               | 91.7     | 20    | 2e-18  | 25.29  | 787    | 1109 |
| 374                  | <i>Auxenochlorella protothecoides</i><br>(taxid:3075)     | <b>1 Dr</b>                                                                                        | 48.9     | 7     | 4e-06  | 27.97  | 546    | 668  |
| 375                  | <i>Helicosporidium</i> sp. ATCC 50920<br>(taxid:1291522)  | No nr/htgs data for this txid id                                                                   |          |       |        |        |        |      |
| 376                  | <i>Coccomyxa subellipsoidea</i> C-169<br>(taxid:574566)   | <b>9 Cv</b> , 4 Lc, 3 Sp, 3 Ac, 2 Cs, 2 Hv, 2 Ag, 1 Sk, 1 Xl, 1 Hs, 1 Dr, 1 At                     | 150      | 4     | 1e-39  | 70.83  | 628    | 723  |
| 377                  | <i>Klebsormidium flaccidum</i><br>(taxid:3175)            | No significant similarity found                                                                    |          |       |        |        |        |      |
| 378                  | <i>Physcomitrella patens</i> (taxid:3218)                 | 10 Xl, 7 Bf, 7 Sk, 5 Sp, 4 Cv, <b>4 Lc</b> , 4 At, 3 Hs, 3 Dr, 3 Cs, 3 Hv, 2 Ag                    | 88.2     | 11    | 1e-22  | 42.73  | 839    | 948  |
| 379                  | <i>Selaginella moellendorffii</i><br>(taxid:88036)        | <b>5 Xl</b> , 4 Sk, 1 Hs, 1 Ag, 1 At                                                               | 61.6     | 9     | 4e-09  | 26.58  | 829    | 1033 |
| 380                  | <i>Pinus taeda</i><br>(taxid:3352)                        | <b>293 At</b> , 94 Lc, 91 Sp, 89 Sk, 89 Hv, 89 Ac, 87 Hs, 82 Bf, 79 Xl, 77 Dr, 76 Ag, 75 Cv, 70 Cs | 595      | 80    | 5e-174 | 30.58  | 531    | 1868 |

| No  | Species and taxon identifier                               | # hits from each query (top hit red)                                                                     | Top hit  |       |        |        |        |      |
|-----|------------------------------------------------------------|----------------------------------------------------------------------------------------------------------|----------|-------|--------|--------|--------|------|
|     |                                                            |                                                                                                          | bitscore | qcovs | evalue | pident | qstart | qend |
| 381 | <i>Amborella trichopoda</i><br>(taxid:13333)               | 179 At, 47 Lc, 43 Sp, 40 Xl, 40 Hv, 38 Sk, 35 Cs, 34 Hs, 33 Dr, 31 Cv, 27 Bf, 27 Ac, 24 Ag               | 317      | 85    | 6e-96  | 38.03  | 998    | 1486 |
| 382 | <i>Spirodela polyrhiza</i><br>(taxid:29656)                | 8 At, 3 Dr, 3 Hv, 2 Cv, 2 Sp, 2 Bf, 2 Sk, 2 Xl, 2 Hs, 2 Lc, 2 Cs, 2 Ac, 2 Ag                             | 422      | 82    | 1e-120 | 27.72  | 660    | 1870 |
| 383 | <i>Phoenix dactylifera</i><br>(taxid:42345)                | 372 At, 78 Hs, 68 Lc, 54 Sp, 52 Cv, 52 Ac, 49 Dr, 48 Hv, 47 Xl, 43 Sk, 43 Cs, 42 Bf, 29 Ag               | 520      | 61    | 5e-157 | 30.07  | 691    | 1869 |
| 384 | <i>Elaeis oleifera</i><br>(taxid:80265)                    | No significant similarity found                                                                          |          |       |        |        |        |      |
| 385 | <i>Ensete ventricosum</i><br>(taxid:4639)                  | No significant similarity found                                                                          |          |       |        |        |        |      |
| 386 | <i>Musa acuminata subsp. malaccensis</i><br>(taxid:214687) | 10 At                                                                                                    | 72.4     | 6     | 4e-12  | 31.30  | 104    | 218  |
| 387 | <i>Sorghum bicolor</i><br>(taxid:4558)                     | 486 At, 151 Hv, 146 Sk, 144 Ac, 142 Hs, 141 Sp, 139 Xl, 137 Lc, 134 Bf, 127 Cs, 111 Dr, 105 Cv, 98 Ag    | 447      | 58    | 1e-126 | 29.14  | 526    | 1640 |
| 388 | <i>Zea mays</i><br>(taxid:4577)                            | 1403 At, 1030 Hs, 999 Hv, 976 Sp, 968 Lc, 898 Bf, 886 Ac, 878 Sk, 867 Xl, 848 Cs, 821 Dr, 785 Ag, 766 Cv | 1212     | 60    | 0.0    | 89.68  | 694    | 1352 |
| 389 | <i>Setaria italica</i><br>(taxid:4555)                     | 40 At, 15 Hs, 15 Hv, 15 Ac, 14 Lc, 12 Bf, 10 Sp, 10 Xl, 9 Sk, 9 Dr, 9 Cs, 9 Ag, 8 Cv                     | 358      | 62    | 2e-99  | 25.67  | 531    | 1721 |
| 390 | <i>Brachypodium distachyon</i><br>(taxid:15368)            | 214 At, 96 Hs, 95 Lc, 89 Bf, 75 Hv, 69 Sp, 40 Xl, 40 Ac, 39 Sk, 38 Cs, 36 Cv, 34 Dr, 33 Ag               | 442      | 55    | 3e-129 | 28.81  | 750    | 1802 |
| 391 | <i>Leersia perrieri</i><br>(taxid:77586)                   | 5 Cv, 5 Bf, 5 At, 4 Sp, 4 Sk, 4 Xl, 4 Hs, 4 Lc, 4 Dr, 4 Cs, 4 Hv, 4 Ac, 4 Ag                             | 308      | 38    | 5e-91  | 29.29  | 975    | 1715 |
| 392 | <i>Oryza barthii</i><br>(taxid:65489)                      | No significant similarity found                                                                          |          |       |        |        |        |      |
| 393 | <i>Oryza brachyantha</i><br>(taxid:4533)                   | 40 At, 14 Lc, 13 Sp, 13 Hs, 13 Hv, 12 Cv, 12 Bf, 12 Sk, 11 Xl, 11 Dr, 11 Cs, 11 Ac, 9 Ag                 | 417      | 57    | 6e-122 | 27.95  | 531    | 1632 |
| 394 | <i>Oryza glumipatula</i><br>(taxid:40148)                  | 5 At, 3 Hv, 2 Lc, 2 Dr, 1 Cv, 1 Sp, 1 Xl, 1 Hs, 1 Cs, 1 Ac                                               | 74.3     | 9     | 2e-14  | 30.07  | 997    | 1144 |

| No  | Species and taxon identifier                            | # hits from each query (top hit red)                                                                                | Top hit  |       |        |        |        |      |
|-----|---------------------------------------------------------|---------------------------------------------------------------------------------------------------------------------|----------|-------|--------|--------|--------|------|
|     |                                                         |                                                                                                                     | bitscore | qcovs | evalue | pident | qstart | qend |
| 395 | <i>Oryza longistaminata</i><br>(taxid:4528)             | No significant similarity found                                                                                     |          |       |        |        |        |      |
| 396 | <i>Oryza meridionalis</i><br>(taxid:40149)              | No significant similarity found                                                                                     |          |       |        |        |        |      |
| 397 | <i>Oryza nivara</i><br>(taxid:4536)                     | 23 At, 8 Lc, 8 Hv, 7 Hs, 6 Sp, 6 Bf, 6 Ac, 5 Dr, 5 Cs, 5 Ag, 4 Cv, 4 Xl, 3 Sk                                       | 385      | 63    | 1e-108 | 27.48  | 521    | 1731 |
| 398 | <i>Oryza punctata</i><br>(taxid:4537)                   | 150 At, 65 Lc, 62 Hs, 61 Ac, 59 Xl, 58 Hv, 56 Cv, 56 Bf, 55 Sp, 52 Cs, 51 Sk, 46 Dr, 43 Ag                          | 406      | 87    | 2e-120 | 32.16  | 862    | 1609 |
| 399 | <i>Oryza sativa Japonica Group</i><br>(taxid:39947)     | 3412 At, 1664 Lc, 1651 Hs, 1651 Hv, 1628 Sp, 1550 Ac, 1495 Bf, 1448 Xl, 1443 Sk, 1434 Dr, 1390 Cv, 1384 Cs, 1292 Ag | 642      | 81    | 0.0    | 31.65  | 627    | 1868 |
| 400 | <i>Zizania latifolia</i><br>(taxid:58934)               | No significant similarity found                                                                                     |          |       |        |        |        |      |
| 401 | <i>Aegilops tauschii</i><br>(taxid:37682)               | 382 At, 157 Hs, 156 Lc, 151 Ac, 148 Sp, 135 Hv, 134 Sk, 134 Dr, 128 Bf, 118 Xl, 118 Cs, 116 Cv, 106 Ag              | 573      | 71    | 5e-167 | 32.11  | 528    | 1639 |
| 402 | <i>Triticum urartu</i><br>(taxid:4572)                  | 24 At, 8 Sp, 8 Bf, 8 Xl, 8 Hs, 8 Lc, 8 Hv, 8 Ac, 7 Cv, 7 Sk, 7 Dr, 7 Cs, 7 Ag                                       | 305      | 58    | 3e-106 | 28.92  | 531    | 1353 |
| 403 | <i>Nelumbo nucifera</i><br>(taxid:4432)                 | 212 At, 47 Sp, 43 Hv, 39 Hs, 38 Lc, 34 Bf, 33 Sk, 32 Xl, 30 Cs, 30 Ag, 27 Cv, 25 Dr, 22 Ac                          | 379      | 55    | 9e-118 | 30.17  | 804    | 1705 |
| 404 | <i>Lupinus angustifolius</i><br>(taxid:3871)            | 4 At, 2 Lc, 2 Ac, 1 Hv                                                                                              | 84.3     | 27    | 6e-33  | 23.54  | 909    | 1349 |
| 405 | <i>Phaseolus vulgaris</i><br>(taxid:3885)               | 213 At, 88 Sp, 74 Lc, 69 Hv, 63 Bf, 63 Hs, 63 Cs, 61 Dr, 59 Ac, 58 Ag, 57 Cv, 57 Xl, 56 Sk                          | 429      | 56    | 7e-121 | 29.76  | 632    | 1705 |
| 406 | <i>Cajanus cajan</i><br>(taxid:3821)                    | No significant similarity found                                                                                     |          |       |        |        |        |      |
| 407 | <i>Vigna angularis var. angularis</i><br>(taxid:157739) | 84 At, 8 Xl, 6 Bf, 6 Lc, 6 Hv, 4 Sk, 4 Hs, 4 Cs, 4 Ac, 3 Sp, 3 Dr, 2 Cv, 2 Ag                                       | 125      | 44    | 3e-27  | 33.33  | 1007   | 1222 |
| 408 | <i>Vigna radiata var. radiata</i><br>(taxid:3916)       | 9 At, 1 Sk, 1 Cs, 1 Hv                                                                                              | 110      | 8     | 8e-24  | 36.42  | 1738   | 1904 |

| No  | Species and taxon identifier                         | # hits from each query (top hit red)                                                                    | Top hit  |       |        |        |        |      |
|-----|------------------------------------------------------|---------------------------------------------------------------------------------------------------------|----------|-------|--------|--------|--------|------|
|     |                                                      |                                                                                                         | bitscore | qcovs | evalue | pident | qstart | qend |
| 409 | <i>Glycine max</i><br>(taxid:3847)                   | 1342 At, 538 Lc, 527 Sp, 502 Hv, 492 Hs, 445 Sk, 440 Bf, 416 Ac, 407 Cs, 404 Xl, 403 Dr, 378 Cv, 350 Ag | 508      | 77    | 1e-146 | 29.25  | 536    | 1904 |
| 410 | <i>Glycine soja</i><br>(taxid:3848)                  | 6 At, 3 Sp, 3 Bf, 3 Sk, 3 Lc, 3 Cs, 3 Hv, 2 Cv, 2 Xl, 2 Hs, 2 Dr, 2 Ac, 2 Ag                            | 420      | 53    | 6e-120 | 30.42  | 536    | 1415 |
| 411 | <i>Cicer arietinum</i><br>(taxid:3827)               | 64 At, 18 Sp, 18 Bf, 18 Cs, 17 Hv, 14 Hs, 12 Sk, 12 Dr, 12 Ac, 11 Xl, 11 Ag, 10 Lc, 7 Cv                | 140      | 18    | 1e-37  | 29.97  | 1060   | 1406 |
| 412 | <i>Medicago truncatula</i><br>(taxid:3880)           | 2001 At, 864 Hs, 857 Lc, 856 Ac, 824 Sp, 814 Bf, 791 Hv, 775 Dr, 773 Cv, 771 Cs, 761 Sk, 760 Xl, 718 Ag | 902      | 70    | 0.0    | 37.72  | 570    | 1906 |
| 413 | <i>Trifolium pratense</i><br>(taxid:57577)           | 2 At                                                                                                    | 117      | 13    | 2e-28  | 33.72  | 1648   | 1906 |
| 414 | <i>Lotus japonicus</i><br>(taxid:34305)              | 1909 At, 818 Sp, 807 Hs, 807 Lc, 777 Hv, 773 Ac, 768 Bf, 746 Dr, 737 Cv, 736 Xl, 734 Sk, 731 Cs, 702 Ag | 1041     | 94    | 0.0    | 34.80  | 71     | 1880 |
| 415 | <i>Malus x domestica</i><br>(taxid:3750)             | 354 At, 115 Hs, 113 Lc, 108 Hv, 105 Xl, 104 Ac, 100 Sk, 98 Bf, 97 Sp, 95 Cv, 94 Dr, 94 Cs, 88 Ag        | 724      | 66    | 0.0    | 40.76  | 539    | 1477 |
| 416 | <i>Pyrus x bretschneideri</i><br>(taxid:225117)      | 66 At, 27 Lc, 21 Sp, 21 Hv, 20 Sk, 20 Xl, 19 Cs, 18 Bf, 18 Hs, 17 Ac, 17 Ag, 16 Cv, 15 Dr               | 930      | 71    | 0.0    | 38.22  | 534    | 1904 |
| 417 | <i>Prunus mume</i><br>(taxid:102107)                 | 181 At, 22 Hv, 21 Xl, 21 Hs, 21 Lc, 21 Ac, 20 Sk, 20 Cs, 19 Sp, 18 Cv, 15 Bf, 14 Dr, 13 Ag              | 617      | 69    | 0.0    | 30.40  | 531    | 1848 |
| 418 | <i>Prunus persica</i><br>(taxid:3760)                | 371 At, 80 Lc, 76 Hs, 73 Hv, 69 Xl, 69 Ac, 66 Sp, 63 Sk, 60 Cv, 60 Cs, 57 Ag, 56 Bf, 56 Dr              | 620      | 77    | 0.0    | 31.02  | 593    | 1887 |
| 419 | <i>Fragaria iinumae</i><br>(taxid:64939)             | No significant similarity found                                                                         |          |       |        |        |        |      |
| 420 | <i>Fragaria nubicola</i><br>(taxid:60188)            | No significant similarity found                                                                         |          |       |        |        |        |      |
| 421 | <i>Fragaria orientalis</i><br>(taxid:101013)         | No significant similarity found                                                                         |          |       |        |        |        |      |
| 422 | <i>Fragaria vesca subsp. vesca</i><br>(taxid:101020) | 230 At, 52 Hv, 51 Xl, 41 Hs, 37 Lc, 35 Ag, 31 Sp, 29 Sk, 28 Bf, 27 Cs, 26 Ac, 23 Cv, 23 Dr              | 501      | 69    | 1e-149 | 27.68  | 579    | 1905 |

| No  | Species and taxon identifier                                    | # hits from each query (top hit red)                                                                       | Top hit  |       |        |        |        |      |
|-----|-----------------------------------------------------------------|------------------------------------------------------------------------------------------------------------|----------|-------|--------|--------|--------|------|
|     |                                                                 |                                                                                                            | bitscore | qcovs | evalue | pident | qstart | qend |
| 423 | <i>Fragaria x ananassa</i><br>(taxid:3747)                      | No significant similarity found                                                                            |          |       |        |        |        |      |
| 424 | <i>Morus notabilis</i><br>(taxid:981085)                        | 22 At, 6 Hs, 3 Sk, 2 Sp, 2 Lc, 2 Hv, 1 Xl, 1 Dr                                                            | 123      | 12    | 7e-28  | 35.00  | 1243   | 1477 |
| 425 | <i>Cannabis sativa</i><br>(taxid:3483)                          | 15 At, 5 Xl, 5 Hs, 5 Cs, 4 Sp, 4 Bf, 4 Lc, 3 Cv, 3 Hv, 2 Ac, 2 Ag, 1 Sk, 1 Dr                              | 285      | 41    | 9e-79  | 30.34  | 870    | 1448 |
| 426 | <i>Castanea mollissima</i><br>(taxid:60419)                     | No significant similarity found                                                                            |          |       |        |        |        |      |
| 427 | <i>Betula nana</i><br>(taxid:216990)                            | No significant similarity found                                                                            |          |       |        |        |        |      |
| 428 | <i>Cucumis melo</i><br>(taxid:3656)                             | 3117 At, 1190 Lc, 1032 Hv, 1029 Sp, 947 Cs, 894 Dr, 877 Xl, 868 Hs, 867 Sk, 855 Bf, 817 Ac, 550 Cv, 548 Ag | 442      | 57    | 7e-124 | 27.43  | 531    | 1634 |
| 429 | <i>Cucumis sativus</i><br>(taxid:3659)                          | 14 At, 3 Sk, 2 Hs, 1 Cv, 1 Sp, 1 Bf, 1 Xl, 1 Lc, 1 Dr, 1 Cs, 1 Hv, 1 Ac, 1 Ag                              | 295      | 35    | 1e-79  | 29.72  | 967    | 1635 |
| 430 | <i>Citrullus lanatus</i><br>(taxid:3654)                        | 8 At, 2 Hs, 2 Lc, 2 Cs, 2 Ag, 1 Sp, 1 Sk, 1 Xl, 1 Dr, 1 Hv                                                 | 86.7     | 8     | 6e-18  | 33.33  | 1268   | 1423 |
| 431 | <i>Lagenaria siceraria</i><br>(taxid:3668)                      | No significant similarity found                                                                            |          |       |        |        |        |      |
| 432 | <i>Populus euphratica</i><br>(taxid:75702)                      | 78 At, 22 Hs, 19 Lc, 17 Hv, 16 Dr, 13 Sp, 13 Sk, 13 Xl, 13 Ac, 12 Cv, 12 Bf, 12 Cs, 12 Ag                  | 395      | 48    | 1e-110 | 28.87  | 531    | 1415 |
| 433 | <i>Populus trichocarpa</i><br>(taxid:3694)                      | 895 At, 271 Hs, 258 Lc, 254 Ac, 249 Hv, 231 Sp, 223 Xl, 219 Bf, 207 Sk, 198 Cv, 195 Ag, 186 Dr, 185 Cs     | 967      | 93    | 0.0    | 39.10  | 531    | 1904 |
| 434 | <i>Jatropha curcas</i><br>(taxid:180498)                        | 175 At, 47 Hs, 43 Lc, 41 Ac, 40 Sk, 40 Xl, 39 Hv, 37 Sp, 34 Cs, 34 Ag, 33 Bf, 30 Cv, 28 Dr                 | 525      | 67    | 2e-157 | 30.01  | 589    | 1873 |
| 435 | <i>Manihot esculenta subsp. flabellifolia</i><br>(taxid:478097) | No significant similarity found                                                                            |          |       |        |        |        |      |
| 436 | <i>Ricinus communis</i><br>(taxid:3988)                         | 48 At, 7 Lc, 5 Sk, 5 Ac, 4 Xl, 4 Hs, 4 Dr, 3 Cs, 2 Cv, 2 Sp, 2 Hv, 2 Ag, 1 Bf                              | 145      | 11    | 2e-37  | 32.16  | 1111   | 1336 |
| 437 | <i>Linum usitatissimum</i><br>(taxid:4006)                      | 40 At, 6 Xl, 5 Lc, 5 Dr, 4 Sk, 4 Hs, 3 Sp, 3 Bf, 2 Cv, 2 Hv, 2 Ac, 1 Cs, 1 Ag                              | 172      | 67    | 3e-43  | 37.74  | 1215   | 1475 |

| No  | Species and taxon identifier                                              | # hits from each query (top hit red)                                                                    | Top hit  |       |        |        |        |      |
|-----|---------------------------------------------------------------------------|---------------------------------------------------------------------------------------------------------|----------|-------|--------|--------|--------|------|
|     |                                                                           |                                                                                                         | bitscore | qcovs | evalue | pident | qstart | qend |
| 438 | <i>Eucalyptus camaldulensis</i><br>(taxid:34316)                          | No significant similarity found                                                                         |          |       |        |        |        |      |
| 439 | <i>Eucalyptus grandis</i><br>(taxid:71139)                                | 501 At, 121 Hs, 115 Sp, 108 Xl, 106 Bf, 105 Hv, 104 Sk, 101 Lc, 91 Cs, 89 Cv, 82 Dr, 80 Ac, 74 Ag       | 595      | 74    | 1e-179 | 29.48  | 548    | 1817 |
| 440 | <i>Carica papaya</i><br>(taxid:3649)                                      | 263 At, 105 Sp, 75 Lc, 75 Hv, 72 Hs, 59 Bf, 59 Sk, 57 Cs, 55 Ac, 54 Cv, 47 Xl, 43 Dr, 41 Ag             | 454      | 63    | 0.0    | 45.60  | 975    | 1484 |
| 441 | <i>Arabidopsis halleri</i> subsp. <i>gemmifera</i><br>(taxid:63677)       | No significant similarity found                                                                         |          |       |        |        |        |      |
| 442 | <i>Arabidopsis lyrata</i> subsp. <i>lyrata</i><br>(taxid:81972)           | 12 At, 1 Cv, 1 Sp, 1 Bf, 1 Sk, 1 Xl, 1 Hs, 1 Lc, 1 Dr, 1 Cs, 1 Hv, 1 Ac, 1 Ag                           | 341      | 52    | 6e-94  | 29.38  | 866    | 1651 |
| 443 | <i>Arabidopsis thaliana</i><br>(taxid:3702)                               | 2163 At, 829 Lc, 796 Hs, 787 Sp, 707 Bf, 703 Ac, 693 Hv, 685 Sk, 679 Xl, 659 Cs, 641 Cv, 580 Ag, 573 Dr | 3608     | 100   | 0.0    | 97.43  | 1      | 1809 |
| 444 | <i>Camelina sativa</i><br>(taxid:90675)                                   | 756 At, 316 Hs, 309 Lc, 288 Sp, 282 Ac, 276 Hv, 252 Xl, 250 Sk, 226 Bf, 216 Cs, 207 Cv, 192 Dr, 188 Ag  | 1203     | 67    | 0.0    | 49.96  | 616    | 1906 |
| 445 | <i>Capsella rubella</i><br>(taxid:81985)                                  | 99 At, 16 Sp, 16 Bf, 16 Hs, 16 Lc, 15 Cv, 13 Cs, 12 Sk, 12 Hv, 12 Ac, 8 Xl, 8 Dr, 8 Ag                  | 1334     | 52    | 0.0    | 63.85  | 900    | 1906 |
| 446 | <i>Brassica napus</i><br>(taxid:3708)                                     | 696 At, 536 Sp, 534 Hs, 534 Lc, 533 Bf, 531 Ac, 527 Hv, 524 Xl, 515 Sk, 492 Cs, 463 Dr, 458 Cv, 446 Ag  | 2301     | 99    | 0.0    | 59.09  | 5      | 1906 |
| 447 | <i>Brassica oleracea</i> var. <i>oleracea</i><br>(taxid:109376)           | 738 At, 335 Ac, 332 Hs, 324 Lc, 315 Hv, 312 Sp, 278 Bf, 278 Sk, 271 Xl, 242 Cs, 223 Dr, 219 Ag, 216 Cv  | 521      | 78    | 5e-153 | 28.87  | 531    | 1845 |
| 448 | <i>Brassica rapa</i><br>(taxid:3711)                                      | 1377 At, 808 Lc, 807 Hs, 783 Sp, 770 Ac, 760 Hv, 756 Sk, 740 Bf, 739 Cs, 734 Xl, 727 Dr, 722 Cv, 693 Ag | 2309     | 99    | 0.0    | 59.39  | 6      | 1904 |
| 449 | <i>Raphanus raphanistrum</i> subsp. <i>raphanistrum</i><br>(taxid:109997) | No significant similarity found                                                                         |          |       |        |        |        |      |

| No  | Species and taxon identifier                     | # hits from each query (top hit red)                                                                   | Top hit  |       |        |        |        |      |
|-----|--------------------------------------------------|--------------------------------------------------------------------------------------------------------|----------|-------|--------|--------|--------|------|
|     |                                                  |                                                                                                        | bitscore | qcovs | evalue | pident | qstart | qend |
| 450 | <i>Raphanus sativus</i><br>(taxid:3726)          | 300 At, 129 Sp, 122 Xl, 122 Lc, 121 Hv, 119 Hs, 119 Ac, 117 Sk, 114 Cs, 113 Cv, 110 Bf, 107 Ag, 100 Dr | 548      | 61    | 9e-159 | 29.50  | 531    | 1698 |
| 451 | <i>Aethionema arabicum</i><br>(taxid:228871)     | No significant similarity found                                                                        |          |       |        |        |        |      |
| 452 | <i>Arabis alpina</i><br>(taxid:50452)            | 8 At, 2 Cv, 2 Sp, 2 Bf, 2 Hs, 2 Dr, 2 Hv, 1 Sk, 1 Xl, 1 Lc, 1 Cs, 1 Ac, 1 Ag                           | 698      | 81    | 0.0    | 63.10  | 789    | 1368 |
| 453 | <i>Eutrema parvulum</i><br>(taxid:98039)         | No significant similarity found                                                                        |          |       |        |        |        |      |
| 454 | <i>Eutrema salsugineum</i><br>(taxid:72664)      | 52 At, 2 Sk, 1 Sp, 1 Bf, 1 Xl, 1 Hs, 1 Lc, 1 Dr, 1 Cs, 1 Hv, 1 Ac                                      | 176      | 6     | 6e-45  | 69.42  | 41     | 161  |
| 455 | <i>Sisymbrium irio</i><br>(taxid:3730)           | 1 At                                                                                                   | 65.1     | 8     | 2e-11  | 29.82  | 1735   | 1897 |
| 456 | <i>Leavenworthia alabamica</i><br>(taxid:310722) | 4 At, 2 Cv, 2 Sp, 2 Bf, 2 Hs, 2 Lc, 2 Hv, 1 Sk, 1 Xl, 1 Ac                                             | 109      | 23    | 7e-54  | 37.42  | 1165   | 1327 |
| 457 | <i>Tarenaya hassleriana</i><br>(taxid:28532)     | 129 At, 51 Hs, 51 Lc, 50 Sp, 48 Xl, 47 Bf, 45 Hv, 45 Ac, 41 Sk, 41 Dr, 41 Cs, 37 Cv, 35 Ag             | 428      | 71    | 5e-122 | 27.80  | 530    | 1643 |
| 458 | <i>Gossypium arboreum</i><br>(taxid:29729)       | 35 At, 7 Xl, 6 Sp, 6 Lc, 6 Hv, 5 Sk, 5 Hs, 5 Dr, 5 Ac, 4 Cv, 4 Bf, 4 Ag, 2 Cs                          | 199      | 83    | 8e-61  | 31.58  | 669    | 1085 |
| 459 | <i>Gossypium raimondii</i><br>(taxid:29730)      | 933 At, 247 Lc, 209 Xl, 195 Sk, 191 Hv, 178 Hs, 159 Cv, 151 Sp, 134 Ac, 117 Bf, 108 Ag, 106 Dr, 101 Cs | 482      | 44    | 3e-145 | 31.78  | 834    | 1690 |
| 460 | <i>Theobroma cacao</i><br>(taxid:3641)           | 625 At, 88 Lc, 73 Hs, 71 Sp, 68 Hv, 64 Xl, 63 Bf, 63 Ac, 58 Sk, 55 Cs, 54 Dr, 44 Cv, 39 Ag             | 557      | 77    | 6e-163 | 29.65  | 547    | 1868 |
| 461 | <i>Aquilaria agallochum</i><br>(taxid:1472648)   | No nr/htgs data for this txid id                                                                       |          |       |        |        |        |      |
| 462 | <i>Azadirachta indica</i><br>(taxid:124943)      | No significant similarity found                                                                        |          |       |        |        |        |      |
| 463 | <i>Citrus clementina</i><br>(taxid:85681)        | 23 At, 2 Hs                                                                                            | 116      | 13    | 4e-27  | 29.96  | 22     | 272  |
| 464 | <i>Citrus sinensis</i><br>(taxid:2711)           | 289 At, 44 Hs, 37 Hv, 36 Sk, 36 Xl, 34 Sp, 34 Lc, 28 Bf, 28 Ac, 27 Cv, 27 Ag, 26 Dr, 26 Cs             | 779      | 68    | 0.0    | 37.25  | 750    | 1904 |



| No  | Species and taxon identifier                         | # hits from each query (top hit red)                                                                                | Top hit  |       |        |        |        |      |
|-----|------------------------------------------------------|---------------------------------------------------------------------------------------------------------------------|----------|-------|--------|--------|--------|------|
|     |                                                      |                                                                                                                     | bitscore | qcovs | evalue | pident | qstart | qend |
| 465 | <i>Vitis vinifera</i><br>(taxid:29760)               | 1576 At, 805 Sp, 776 Bf, 746 Xl, 728 Hs, 719 Dr, 694 Lc, 691 Ac, 690 Sk, 687 Hv, 636 Cs, 625 Ag, 622 Cv             | 540      | 69    | 3e-157 | 29.49  | 552    | 1873 |
| 466 | <i>Amaranthus hypochondriacus</i><br>(taxid:28502)   | 5 At, 3 Hv, 2 Sp, 2 Bf, 2 Sk, 2 Hs, 2 Lc, 2 Cs, 2 Ac, 2 Ag, 1 Cv, 1 Xl, 1 Dr                                        | 88.2     | 4     | 1e-20  | 46.67  | 1110   | 1199 |
| 467 | <i>Amaranthus tuberculatus</i><br>(taxid:277990)     | No significant similarity found                                                                                     |          |       |        |        |        |      |
| 468 | <i>Beta vulgaris subsp. vulgaris</i><br>(taxid:3555) | 696 At, 391 Hv, 382 Hs, 365 Ac, 361 Lc, 352 Xl, 335 Sk, 334 Bf, 327 Sp, 325 Cs, 300 Dr, 298 Cv, 293 Ag              | 989      | 87    | 0.0    | 39.52  | 529    | 1904 |
| 469 | <i>Spinacia oleracea</i><br>(taxid:3562)             | 1 At                                                                                                                | 57.8     | 4     | 1e-09  | 40.66  | 1815   | 1904 |
| 470 | <i>Dianthus caryophyllus</i><br>(taxid:3570)         | 2 At                                                                                                                | 288      | 35    | 3e-116 | 34.08  | 1381   | 1905 |
| 471 | <i>Actinidia chinensis</i><br>(taxid:3625)           | No significant similarity found                                                                                     |          |       |        |        |        |      |
| 472 | <i>Vaccinium macrocarpon</i><br>(taxid:13750)        | 20 At, 6 Hs, 6 Lc, 4 Bf, 4 Sk, 4 Xl, 3 Cv, 3 Sp, 3 Cs, 3 Hv, 3 Ac, 3 Ag, 2 Dr                                       | 188      | 69    | 2e-57  | 45.45  | 1102   | 1309 |
| 473 | <i>Diospyros lotus</i><br>(taxid:55363)              | No significant similarity found                                                                                     |          |       |        |        |        |      |
| 474 | <i>Primula veris</i><br>(taxid:170927)               | No significant similarity found                                                                                     |          |       |        |        |        |      |
| 475 | <i>Solanum arcanum</i><br>(taxid:376710)             | No significant similarity found                                                                                     |          |       |        |        |        |      |
| 476 | <i>Solanum habrochaites</i><br>(taxid:62890)         | 3 Sk, 3 Lc, 3 Cs, 3 Ag, 3 At, 2 Sp, 2 Hs, 2 Dr, 2 Hv, 1 Cv, 1 Bf, 1 Xl, 1 Ac                                        | 229      | 61    | 1e-126 | 31.12  | 688    | 1097 |
| 477 | <i>Solanum lycopersicum</i><br>(taxid:4081)          | 7088 At, 2074 Sp, 2069 Lc, 1984 Hv, 1776 Hs, 1752 Sk, 1612 Ac, 1565 Bf, 1523 Xl, 1436 Cs, 1155 Ag, 1132 Cv, 1064 Dr | 533      | 86    | 2e-152 | 28.60  | 529    | 1888 |
| 478 | <i>Solanum melongena</i><br>(taxid:4111)             | 2 Cv, 2 Hs, 2 Lc, 2 Ac, 2 Ag, 1 Sp, 1 Bf, 1 Xl, 1 Hv, 1 At                                                          | 73.2     | 14    | 3e-14  | 26.69  | 934    | 1169 |
| 479 | <i>Solanum pennellii</i><br>(taxid:28526)            | 6096 At, 1653 Lc, 1650 Sp, 1608 Hv, 1411 Sk, 1367 Hs, 1272 Ac, 1256 Bf, 1209 Xl, 1198 Cs, 917 Ag, 872 Cv, 862 Dr    | 514      | 86    | 2e-146 | 27.50  | 528    | 1905 |

| No                | Species and taxon identifier                       | # hits from each query (top hit red)                                                                            | Top hit  |       |        |        |        |      |
|-------------------|----------------------------------------------------|-----------------------------------------------------------------------------------------------------------------|----------|-------|--------|--------|--------|------|
|                   |                                                    |                                                                                                                 | bitscore | qcovs | evalue | pident | qstart | qend |
| 480               | <i>Solanum pimpinellifolium</i><br>(taxid:4084)    | 1 Cv, 1 Sp, 1 Bf, 1 Sk, 1 Hs, 1 Lc, 1 Cs, 1 Ag, <b>1 At</b>                                                     | 101      | 17    | 2e-22  | 28.10  | 859    | 1199 |
| 481               | <i>Solanum tuberosum</i><br>(taxid:4113)           | <b>2068 At</b> , 806 Hs, 799 Hv, 797 Sp, 772 Lc, 728 Ac, 724 Sk, 705 Bf, 683 Xl, 618 Cs, 567 Cv, 557 Dr, 523 Ag | 689      | 82    | 0.0    | 33.78  | 531    | 1642 |
| 482               | <i>Capsicum annuum</i><br>(taxid:4072)             | <b>32 At</b> , 12 Hs, 11 Sp, 10 Cv, 10 Hv, 8 Bf, 8 Lc, 8 Ac, 7 Cs, 6 Sk, 3 Xl, 3 Dr, 3 Ag                       | 186      | 47    | 2e-47  | 24.79  | 1198   | 1870 |
| 483               | <i>Nicotiana sylvestris</i><br>(taxid:4096)        | <b>795 At</b> , 267 Hs, 262 Lc, 258 Sp, 242 Hv, 235 Ac, 206 Xl, 205 Sk, 198 Bf, 189 Cs, 180 Cv, 166 Dr, 158 Ag  | 402      | 46    | 3e-114 | 30.22  | 595    | 1482 |
| 484               | <i>Nicotiana tomentosiformis</i><br>(taxid:4098)   | <b>747 At</b> , 242 Sp, 235 Hs, 227 Lc, 216 Hv, 202 Xl, 197 Ac, 196 Bf, 189 Sk, 166 Cs, 150 Cv, 133 Ag, 118 Dr  | 416      | 66    | 3e-168 | 39.19  | 859    | 1399 |
| 485               | <i>Fraxinus excelsior</i><br>(taxid:38873)         | No significant similarity found                                                                                 |          |       |        |        |        |      |
| 486               | <i>Penstemon centranthifolius</i><br>(taxid:69924) | No significant similarity found                                                                                 |          |       |        |        |        |      |
| 487               | <i>Penstemon grinnellii</i><br>(taxid:388155)      | No significant similarity found                                                                                 |          |       |        |        |        |      |
| 488               | <i>Sesamum indicum</i><br>(taxid:4182)             | <b>240 At</b> , 99 Hv, 73 Xl, 73 Hs, 72 Bf, 67 Lc, 63 Sp, 60 Sk, 50 Ac, 49 Cs, 45 Cv, 32 Dr, 29 Ag              | 528      | 63    | 6e-160 | 29.69  | 561    | 1768 |
| 489               | <i>Genlisea aurea</i><br>(taxid:192259)            | No significant similarity found                                                                                 |          |       |        |        |        |      |
| 490               | <i>Mimulus guttatus</i><br>(taxid:4155)            | <b>225 At</b> , 86 Hs, 73 Lc, 73 Hv, 70 Sp, 69 Sk, 66 Bf, 65 Ac, 64 Cs, 63 Xl, 63 Dr, 62 Cv, 56 Ag              | 578      | 67    | 6e-177 | 30.56  | 587    | 1879 |
| 491               | <i>Conyza canadensis</i><br>(taxid:72917)          | No significant similarity found                                                                                 |          |       |        |        |        |      |
| <b>ECHINOIDEA</b> |                                                    |                                                                                                                 |          |       |        |        |        |      |
| 492               | <i>Lytechinus variegatus</i><br>(taxid:7654)       | <b>16 Bf</b> , 14 Hs, 14 Lc, 13 Ac, 12 Sp, 12 Xl, 11 Sk, 11 Dr, 11 Cs, 9 Cv, 9 Hv, 8 Ag, 6 At                   | 473      | 74    | 8e-146 | 30.78  | 487    | 1640 |

| No                        | Species and taxon identifier                         | # hits from each query (top hit red)                                                                                                   | Top hit  |       |        |        |        |      |
|---------------------------|------------------------------------------------------|----------------------------------------------------------------------------------------------------------------------------------------|----------|-------|--------|--------|--------|------|
|                           |                                                      |                                                                                                                                        | bitscore | qcovs | evalue | pident | qstart | qend |
| 493                       | <i>Strongylocentrotus purpuratus</i><br>(taxid:7668) | 1930 Sp, 1817 Bf, <b>1634 Hs</b> ,<br>1619 Lc, 1382 Sk, 1334 Dr,<br>1320 Ac, 1299 Xl, 1263<br>Hv, 1197 Cs, 1092 Ag,<br>1020 Cv, 930 At | 2730     | 100   | 0.0    | 89.85  | 128    | 1574 |
| <b>ASTEROIDEA</b>         |                                                      |                                                                                                                                        |          |       |        |        |        |      |
| 494                       | <i>Patiria miniata</i><br>(taxid:46514)              | No significant similarity found                                                                                                        |          |       |        |        |        |      |
| <b>ENTEROPNEUSTA</b>      |                                                      |                                                                                                                                        |          |       |        |        |        |      |
| 495                       | <i>Saccoglossus kowalevskii</i><br>(taxid:10224)     | <b>91 Sk</b> , 86 Sp, 80 Bf, 71 Hs,<br>67 Xl, 66 Lc, 60 Dr, 56<br>Hv, 56 Ac, 48 Cs, 38 Ag,<br>33 At, 30 Cv                             | 1451     | 99    | 0.0    | 56.67  | 539    | 1774 |
| <b>TUNICATA</b>           |                                                      |                                                                                                                                        |          |       |        |        |        |      |
| 496                       | <i>Ciona intestinalis</i><br>(taxid:7719)            | 12 Cs, 10 Ag, 9 Sp, <b>8 Bf</b> , 8<br>Sk, 8 Xl, 8 Hs, 8 Lc, 8 Dr,<br>8 Hv, 8 Ac, 8 At, 7 Cv                                           | 482      | 74    | 1e-141 | 29.28  | 405    | 1624 |
| 497                       | <i>Ciona savignyi</i><br>(taxid:51511)               | <b>2 Cs</b> , 1 Cv, 1 Sp, 1 Bf, 1<br>Sk, 1 Xl, 1 Hs, 1 Lc, 1 Dr,<br>1 Hv, 1 Ac, 1 Ag, 1 At                                             | 773      | 79    | 0.0    | 37.95  | 469    | 1626 |
| 498                       | <i>Botryllus schlosseri</i><br>(taxid:30301)         | 1 Cv, 1 Sp, 1 Bf, 1 Sk, 1<br>Xl, 1 Dr, 1 Cs, <b>1 Ac</b> , 1 Ag,<br>1 At                                                               | 83.2     | 16    | 5e-17  | 28.29  | 742    | 989  |
| 499                       | <i>Oikopleura dioica</i><br>(taxid:34765)            | No significant similarity found                                                                                                        |          |       |        |        |        |      |
| <b>LEPTOCARDII</b>        |                                                      |                                                                                                                                        |          |       |        |        |        |      |
| 500                       | <i>Branchiostoma floridae</i><br>(taxid:7739)        | <b>39 Bf</b> , 35 Ac, 34 Lc, 32<br>Sp, 31 Sk, 28 Hs, 26 Cs,<br>25 Dr, 24 Ag, 23 Cv, 23<br>Xl, 20 At, 19 Hv                             | 545      | 70    | 2e-159 | 32.30  | 407    | 1569 |
| <b>CEPHALASPIDOMORPHI</b> |                                                      |                                                                                                                                        |          |       |        |        |        |      |
| 501                       | <i>Lethenteron camtschaticum</i><br>(taxid:980415)   | 2 Sp, 2 Bf, 2 Hs, 2 Lc, 2<br>Ac, 2 Ag, 1 Cv, 1 Sk, <b>1 Xl</b> ,<br>1 Dr, 1 Cs, 1 Hv, 1 At                                             | 103      | 16    | 7e-23  | 25.35  | 1138   | 1485 |
| 502                       | <i>Petromyzon marinus</i><br>(taxid:7757)            | 15 Sp, 15 Bf, 14 Dr, 14<br>Ac, 14 At, <b>13 Hs</b> , 13 Lc,<br>10 Sk, 10 Xl, 10 Cs, 10<br>Ag, 8 Cv, 8 Hv                               | 122      | 28    | 2e-28  | 25.16  | 728    | 1180 |
| <b>SARCOPTERYGII</b>      |                                                      |                                                                                                                                        |          |       |        |        |        |      |
| 503                       | <i>Latimeria chalumnae</i><br>(taxid:7897)           | <b>286 Lc</b> , 137 Hs, 105 Ac,<br>86 Xl, 77 Sk, 72 Sp, 71<br>Hv, 64 Bf, 62 Cs, 60 Cv,<br>56 Dr, 51 At, 43 Ag                          | 1331     | 93    | 0.0    | 72.08  | 377    | 1300 |

### 3.1.2 Table 5: L1s in the genome, found using LASTZ

Table 5: **Presence of L1:** Shows which species contain evidence of L1 elements based on query-driven iterative similarity searches with LASTZ. Any hits found had to satisfy a 'reciprocal best hit' check: they were screened with CENSOR against the Repbase library of known repeats, and kept only if the best hit was an L1 element (not some other repeat like BovB elements). Overlapping hits were merged to produce a non-redundant (unique) set of L1s for each genome. The Notes column highlights interesting observations or additional information about the L1 hits, particularly in species that have been previously studied. Species are listed in the same order as Table 1, for easy reference to the common name. L1 hits that are thought to be due to contamination are marked as such, and were excluded from further analyses.

| No              | Species                               | # unique L1 hits | Length distribution (bp)              | Notes                                                                                                                                                                                                                                                                                         |
|-----------------|---------------------------------------|------------------|---------------------------------------|-----------------------------------------------------------------------------------------------------------------------------------------------------------------------------------------------------------------------------------------------------------------------------------------------|
| <b>MAMMALIA</b> |                                       |                  |                                       |                                                                                                                                                                                                                                                                                               |
| 1               | <i>Tachyglossus aculeatus</i>         | 0                | -                                     |                                                                                                                                                                                                                                                                                               |
| 2               | <i>Ornithorhynchus anatinus</i>       | 0                | -                                     | The few hits found were dismissed as contamination due to very high similarity to wallaby L1s. Both monotreme genomes seem to be missing L1s, yet contain an abundance of L2s.                                                                                                                |
| 3               | <i>Monodelphis domestica</i>          | 90570            | min 32, avg 1858, med 1297, max 12259 | Has been shown to have active full-length L1s (Gu et al, 2007; Mikkelsen et al, 2007). Gallus 2015 found more the 10,000 near full-length L1 copies, but only 500 were potentially active.                                                                                                    |
| 4               | <i>Macropus eugenii</i>               | 119716           | min 33, avg 936, med 376, max 10898   | Few full-length L1s could be assembled in the initial assembly.                                                                                                                                                                                                                               |
| 5               | <i>Sarcophilus harrisii</i>           | 117881           | min 32, avg 755, med 234, max 8834    | Jurka et al, 2011: most recently active element was L1-1.SH (6676bp length consensus). Gallus et al, 2015: found 384 L1 copies >6kb, which were either full-length or near full-length; all inactive due to mutations. Screening a second Tas devil genome also found only inactive elements. |
| 6               | <i>Dasyurus novemcinctus</i>          | 200433           | min 34, avg 1153, med 559, max 13923  |                                                                                                                                                                                                                                                                                               |
| 7               | <i>Choloepus hoffmanni</i>            | 166824           | min 35, avg 870, med 609, max 11920   |                                                                                                                                                                                                                                                                                               |
| 8               | <i>Chrysochloris asiatica</i>         | 58332            | min 35, avg 853, med 97, max 7157     |                                                                                                                                                                                                                                                                                               |
| 9               | <i>Echinops telfairi</i>              | 22557            | min 36, avg 1324, med 731, max 7224   |                                                                                                                                                                                                                                                                                               |
| 10              | <i>Orycteropus afer afer</i>          | 123833           | min 34, avg 946, med 134, max 10293   |                                                                                                                                                                                                                                                                                               |
| 11              | <i>Elephantulus edwardii</i>          | 64503            | min 33, avg 740, med 70, max 7108     |                                                                                                                                                                                                                                                                                               |
| 12              | <i>Trichechus manatus latirostris</i> | 142979           | min 32, avg 1066, med 502, max 14101  |                                                                                                                                                                                                                                                                                               |

| No | Species                              | # unique L1 hits | Length distribution (bp)              | Notes                                                                     |
|----|--------------------------------------|------------------|---------------------------------------|---------------------------------------------------------------------------|
| 13 | <i>Procapra capensis</i>             | 156194           | min 32, avg 1132, med 737, max 11303  |                                                                           |
| 14 | <i>Loxodonta africana</i>            | 114985           | min 33, avg 2142, med 1203, max 14036 |                                                                           |
| 15 | <i>Erinaceus europaeus</i>           | 35717            | min 36, avg 1090, med 89, max 10024   |                                                                           |
| 16 | <i>Sorex araneus</i>                 | 61801            | min 33, avg 800, med 370, max 10424   |                                                                           |
| 17 | <i>Condylura cristata</i>            | 21240            | min 35, avg 765, med 91, max 7199     |                                                                           |
| 18 | <i>Pteropus alecto</i>               | 95017            | min 33, avg 836, med 333, max 12178   | All full-length L1s are extinct (Cantrell et al, 2008; Zhang et al, 2013) |
| 19 | <i>Pteropus vampyrus</i>             | 85330            | min 35, avg 785, med 301, max 9856    | All full-length L1s are extinct (Cantrell et al, 2008; Zhang et al, 2013) |
| 20 | <i>Eidolon helvum</i>                | 67370            | min 34, avg 749, med 212, max 8961    |                                                                           |
| 21 | <i>Megaderma lyra</i>                | 57559            | min 32, avg 751, med 203, max 9765    |                                                                           |
| 22 | <i>Rhinolophus ferrumequinum</i>     | 75265            | min 33, avg 664, med 207, max 9717    |                                                                           |
| 23 | <i>Pteronotus parnellii</i>          | 68630            | min 33, avg 809, med 179, max 9062    |                                                                           |
| 24 | <i>Eptesicus fuscus</i>              | 66233            | min 35, avg 559, med 210, max 11254   |                                                                           |
| 25 | <i>Myotis brandtii</i>               | 85947            | min 37, avg 628, med 244, max 10288   |                                                                           |
| 26 | <i>Myotis davidii</i>                | 74106            | min 36, avg 540, med 211, max 11658   |                                                                           |
| 27 | <i>Myotis lucifugus</i>              | 82275            | min 33, avg 790, med 306, max 12207   |                                                                           |
| 28 | <i>Ceratotherium simum simum</i>     | 112606           | min 32, avg 1016, med 304, max 12095  |                                                                           |
| 29 | <i>Equus przewalskii</i>             | 114836           | min 35, avg 1129, med 348, max 15366  |                                                                           |
| 30 | <i>Equus caballus</i> (Thoroughbred) | 86806            | min 37, avg 1534, med 481, max 13504  |                                                                           |
| 31 | <i>Equus caballus</i> (Mongolian)    | 113546           | min 34, avg 1076, med 317, max 15282  |                                                                           |
| 32 | <i>Manis pentadactyla</i>            | 130736           | min 32, avg 840, med 180, max 10267   |                                                                           |
| 33 | <i>Felis catus</i>                   | 82057            | min 33, avg 1312, med 488, max 11372  |                                                                           |
| 34 | <i>Panthera tigris altaica</i>       | 124302           | min 33, avg 961, med 366, max 13604   |                                                                           |
| 35 | <i>Canis lupus familiaris</i>        | 91247            | min 34, avg 1321, med 510, max 11672  | Known to contain active L1s.                                              |
| 36 | <i>Ursus maritimus</i>               | 114732           | min 36, avg 998, med 330, max 13373   |                                                                           |

| No | Species                                         | # unique L1 hits | Length distribution (bp)             | Notes                                                                                                     |
|----|-------------------------------------------------|------------------|--------------------------------------|-----------------------------------------------------------------------------------------------------------|
| 37 | <i>Ailuropoda melanoleuca</i>                   | 111345           | min 35, avg 883, med 256, max 11844  | Gallus et al, 2015: 3'-end analysis of L1 copies found 8000 3' copies, 1811 of which were 100% identical. |
| 38 | <i>Leptonychotes weddellii</i>                  | 123675           | min 34, avg 809, med 282, max 10738  |                                                                                                           |
| 39 | <i>Odobenus rosmarus divergens</i>              | 131771           | min 35, avg 905, med 337, max 11279  |                                                                                                           |
| 40 | <i>Mustela putorius furo</i>                    | 115201           | min 35, avg 912, med 312, max 10819  |                                                                                                           |
| 41 | <i>Camelus dromedarius</i>                      | 108860           | min 34, avg 709, med 281, max 11206  |                                                                                                           |
| 42 | <i>Camelus ferus</i>                            | 106834           | min 34, avg 677, med 278, max 11795  |                                                                                                           |
| 43 | <i>Vicugna pacos</i>                            | 140145           | min 34, avg 597, med 298, max 10598  |                                                                                                           |
| 44 | <i>Sus scrofa</i> (Duroc)                       | 106518           | min 33, avg 1034, med 411, max 11196 |                                                                                                           |
| 45 | <i>Sus scrofa</i> (Tibetan)                     | 153974           | min 34, avg 828, med 388, max 13253  |                                                                                                           |
| 46 | <i>Sus scrofa</i> (Ellegaard Gottingen minipig) | 143073           | min 34, avg 820, med 372, max 11185  |                                                                                                           |
| 47 | <i>Balaenoptera acutorostrata scammoni</i>      | 160363           | min 35, avg 931, med 389, max 10933  |                                                                                                           |
| 48 | <i>Physeter catodon</i>                         | 154909           | min 34, avg 920, med 406, max 12918  |                                                                                                           |
| 49 | <i>Lipotes vexillifer</i>                       | 161501           | min 34, avg 1566, med 510, max 15715 |                                                                                                           |
| 50 | <i>Tursiops truncatus</i>                       | 204226           | min 33, avg 581, med 294, max 14298  |                                                                                                           |
| 51 | <i>Orcinus orca</i>                             | 163509           | min 34, avg 1001, med 430, max 12828 |                                                                                                           |
| 52 | <i>Pantholops hodgsonii</i>                     | 103273           | min 32, avg 711, med 250, max 10045  |                                                                                                           |
| 53 | <i>Capra hircus</i>                             | 80532            | min 31, avg 723, med 280, max 11295  |                                                                                                           |
| 54 | <i>Ovis aries</i> (Texel)                       | 68523            | min 33, avg 979, med 332, max 11832  |                                                                                                           |
| 55 | <i>Ovis aries musimon</i>                       | 94579            | min 34, avg 641, med 244, max 12652  |                                                                                                           |
| 56 | <i>Bubalus bubalis</i>                          | 148873           | min 31, avg 637, med 372, max 16417  |                                                                                                           |
| 57 | <i>Bison bison bison</i>                        | 165700           | min 31, avg 612, med 364, max 12472  | Lots of small hits <1kb                                                                                   |
| 58 | <i>Bos mutus</i>                                | 106670           | min 31, avg 690, med 264, max 12276  |                                                                                                           |
| 59 | <i>Bos indicus</i>                              | 73472            | min 31, avg 993, med 337, max 12582  |                                                                                                           |
| 60 | <i>Bos taurus</i>                               | 80521            | min 31, avg 1019, med 376, max 12797 |                                                                                                           |

| No | Species                               | # unique L1 hits | Length distribution (bp)              | Notes                                                                    |
|----|---------------------------------------|------------------|---------------------------------------|--------------------------------------------------------------------------|
| 61 | <i>Ochotona princeps</i>              | 22298            | min 36, avg 783, med 298, max 7183    |                                                                          |
| 62 | <i>Oryctolagus cuniculus</i>          | 54371            | min 36, avg 1591, med 798, max 13252  |                                                                          |
| 63 | <i>Ictidomys tridecemlineatus</i>     | 77077            | min 34, avg 953, med 405, max 8995    | Only has extinct L1s (full-length but none active) (Platt and Ray, 2012) |
| 64 | <i>Heterocephalus glaber</i>          | 68845            | min 34, avg 1233, med 263, max 9489   |                                                                          |
| 65 | <i>Fukomys damarensis</i>             | 60536            | min 35, avg 1764, med 932, max 10470  |                                                                          |
| 66 | <i>Cavia aperea</i>                   | 82452            | min 35, avg 979, med 500, max 12977   |                                                                          |
| 67 | <i>Cavia porcellus</i>                | 91003            | min 37, avg 2032, med 1210, max 13197 |                                                                          |
| 68 | <i>Chinchilla lanigera</i>            | 60066            | min 36, avg 1337, med 524, max 9883   |                                                                          |
| 69 | <i>Octodon degus</i>                  | 54941            | min 36, avg 1463, med 341, max 7751   |                                                                          |
| 70 | <i>Dipodomys ordii</i>                | 35919            | min 31, avg 886, med 92, max 7728     |                                                                          |
| 71 | <i>Jaculus jaculus</i>                | 32853            | min 34, avg 1493, med 1275, max 7358  |                                                                          |
| 72 | <i>Nannospalax galili</i>             | 55684            | min 36, avg 1756, med 1729, max 7868  |                                                                          |
| 73 | <i>Mesocricetus auratus</i>           | 55501            | min 35, avg 812, med 206, max 9681    |                                                                          |
| 74 | <i>Cricetulus griseus</i>             | 67154            | min 36, avg 970, med 249, max 11338   |                                                                          |
| 75 | <i>Microtus ochrogaster</i>           | 30787            | min 36, avg 778, med 195, max 6404    |                                                                          |
| 76 | <i>Peromyscus maniculatus bairdii</i> | 46108            | min 33, avg 852, med 247, max 9389    |                                                                          |
| 77 | <i>Rattus norvegicus</i>              | 95516            | min 34, avg 1601, med 848, max 11866  |                                                                          |
| 78 | <i>Mus musculus</i>                   | 99565            | min 34, avg 1820, med 873, max 18858  | Known to contain active L1s.                                             |
| 79 | <i>Tupaia belangeri</i>               | 67395            | min 36, avg 750, med 459, max 10269   |                                                                          |
| 80 | <i>Tupaia chinensis</i>               | 73595            | min 34, avg 987, med 468, max 10640   |                                                                          |
| 81 | <i>Galeopterus variegatus</i>         | 166885           | min 33, avg 791, med 146, max 9846    |                                                                          |
| 82 | <i>Otolemur garnettii</i>             | 100949           | min 34, avg 1003, med 375, max 8925   |                                                                          |
| 83 | <i>Microcebus murinus</i>             | 105998           | min 34, avg 637, med 281, max 10808   |                                                                          |
| 84 | <i>Tarsius syrichta</i>               | 168419           | min 34, avg 1365, med 356, max 14075  | Tarsier has the most L1 hits out of all the primates.                    |
| 85 | <i>Callithrix jacchus</i>             | 145866           | min 33, avg 1293, med 682, max 12300  |                                                                          |

| No | Species                                | # unique L1 hits | Length distribution (bp)             | Notes                                                                                                                                                                                                                                     |
|----|----------------------------------------|------------------|--------------------------------------|-------------------------------------------------------------------------------------------------------------------------------------------------------------------------------------------------------------------------------------------|
| 86 | <i>Saimiri boliviensis boliviensis</i> | 126736           | min 34, avg 1154, med 516, max 11681 |                                                                                                                                                                                                                                           |
| 87 | <i>Rhinopithecus roxellana</i>         | 161163           | min 34, avg 1220, med 475, max 15293 |                                                                                                                                                                                                                                           |
| 88 | <i>Nasalis larvatus</i>                | 100412           | min 34, avg 1079, med 548, max 10255 |                                                                                                                                                                                                                                           |
| 89 | <i>Chlorocebus sabaeus</i>             | 114335           | min 34, avg 1339, med 606, max 12077 |                                                                                                                                                                                                                                           |
| 90 | <i>Macaca fascicularis</i>             | 114193           | min 34, avg 1403, med 646, max 12442 |                                                                                                                                                                                                                                           |
| 91 | <i>Macaca mulatta</i>                  | 108459           | min 33, avg 936, med 376, max 10898  |                                                                                                                                                                                                                                           |
| 92 | <i>Papio anubis</i>                    | 123791           | min 34, avg 1279, med 629, max 12138 |                                                                                                                                                                                                                                           |
| 93 | <i>Nomascus leucogenys</i>             | 126230           | min 33, avg 1417, med 692, max 13430 |                                                                                                                                                                                                                                           |
| 94 | <i>Pongo abelii</i>                    | 157381           | min 33, avg 1268, med 638, max 13087 |                                                                                                                                                                                                                                           |
| 95 | <i>Gorilla gorilla gorilla</i>         | 127050           | min 34, avg 1187, med 603, max 16253 |                                                                                                                                                                                                                                           |
| 96 | <i>Pan paniscus</i>                    | 149841           | min 33, avg 1353, med 591, max 14715 |                                                                                                                                                                                                                                           |
| 97 | <i>Pan troglodytes</i>                 | 130898           | min 33, avg 1404, med 665, max 16238 |                                                                                                                                                                                                                                           |
| 98 | <i>Homo sapiens</i>                    | 118667           | min 34, avg 1562, med 716, max 18773 | Thought to be about 6000-7000 full-length L1s per human genome, of which only 80-100 are proven to be retrotranspositionally-competent in cell culture (Lander et al, 2001; Brouha et al, 2003; Penzkofer et al, 2005; Khan et al, 2006). |

#### SAUROPSIDA

|     |                                   |      |                                    |              |
|-----|-----------------------------------|------|------------------------------------|--------------|
| 99  | <i>Apalone spinifera</i>          | 2236 | min 82, avg 512, med 357, max 5911 | Ancient L1s? |
| 100 | <i>Pelodiscus sinensis</i>        | 1623 | min 84, avg 754, med 477, max 7157 |              |
| 101 | <i>Chelonia mydas</i>             | 2819 | min 81, avg 839, med 462, max 8320 |              |
| 102 | <i>Chrysemys picta bellii</i>     | 2343 | min 76, avg 975, med 524, max 8573 |              |
| 103 | <i>Struthio camelus australis</i> | 47   | min 75, avg 384, med 248, max 3825 |              |
| 104 | <i>Tinamus guttatus</i>           | 19   | min 83, avg 332, med 281, max 1197 |              |
| 105 | <i>Anas platyrhynchos</i>         | 29   | min 98, avg 518, med 208, max 4578 |              |
| 106 | <i>Lyrurus tetrix tetrix</i>      | 13   | min 72, avg 333, med 280, max 780  |              |



| No  | Species                              | # unique L1 hits | Length distribution (bp)            | Notes                                                                                                                                                     |
|-----|--------------------------------------|------------------|-------------------------------------|-----------------------------------------------------------------------------------------------------------------------------------------------------------|
| 107 | <i>Gallus gallus</i>                 | 15               | min 87, avg 561, med 240, max 4412  |                                                                                                                                                           |
| 108 | <i>Coturnix japonica</i>             | 3                | min 82, avg 168, med 143, max 280   |                                                                                                                                                           |
| 109 | <i>Meleagris gallopavo</i>           | 7                | min 86, avg 752, med 279, max 4020  |                                                                                                                                                           |
| 110 | <i>Colinus virginianus</i>           | 121              | min 70, avg 511, med 376, max 4090  |                                                                                                                                                           |
| 111 | <i>Acanthisitta chloris</i>          | 33               | min 90, avg 695, med 289, max 4493  |                                                                                                                                                           |
| 112 | <i>Manacus vitellinus</i>            | 31               | min 102, avg 600, med 279, max 4602 |                                                                                                                                                           |
| 113 | <i>Zonotrichia albicollis</i>        | 30               | min 65, avg 348, med 207, max 4512  |                                                                                                                                                           |
| 114 | <i>Geospiza fortis</i>               | 20               | min 114, avg 715, med 296, max 4489 |                                                                                                                                                           |
| 115 | <i>Serinus canaria</i>               | 381              | min 61, avg 152, med 102, max 4516  | Some hits show high similarity to human L1s - there were dismissed as contamination. Hits that showed more similarity to turtle or reptile L1s were kept. |
| 116 | <i>Taeniopygia guttata</i>           | 22               | min 84, avg 638, med 316, max 4354  |                                                                                                                                                           |
| 117 | <i>Ficedula albicollis</i>           | 28               | min 108, avg 523, med 273, max 4569 |                                                                                                                                                           |
| 118 | <i>Pseudopodoces humilis</i>         | 34               | min 68, avg 503, med 211, max 4312  |                                                                                                                                                           |
| 119 | <i>Corvus brachyrhynchos</i>         | 45               | min 77, avg 459, med 248, max 4515  |                                                                                                                                                           |
| 120 | <i>Corvus cornix cornix</i>          | 32               | min 76, avg 542, med 257, max 4586  |                                                                                                                                                           |
| 121 | <i>Ara macao</i>                     | 46               | min 107, avg 382, med 283, max 2083 |                                                                                                                                                           |
| 122 | <i>Amazona vittata</i>               | 58               | min 72, avg 378, med 272, max 3513  |                                                                                                                                                           |
| 123 | <i>Melopsittacus undulatus</i>       | 34               | min 73, avg 540, med 293, max 3737  |                                                                                                                                                           |
| 124 | <i>Nestor notabilis</i>              | 47               | min 95, avg 515, med 267, max 3928  |                                                                                                                                                           |
| 125 | <i>Falco cherrug</i>                 | 49               | min 101, avg 489, med 280, max 4512 |                                                                                                                                                           |
| 126 | <i>Falco peregrinus</i>              | 47               | min 110, avg 490, med 291, max 3806 |                                                                                                                                                           |
| 127 | <i>Cariama cristata</i>              | 54               | min 125, avg 564, med 270, max 4604 |                                                                                                                                                           |
| 128 | <i>Merops nubicus</i>                | 33               | min 121, avg 652, med 282, max 4075 |                                                                                                                                                           |
| 129 | <i>Picoides pubescens</i>            | 29               | min 72, avg 220, med 208, max 641   |                                                                                                                                                           |
| 130 | <i>Buceros rhinoceros silvestris</i> | 35               | min 71, avg 468, med 289, max 4513  |                                                                                                                                                           |

| No  | Species                                | # unique L1 hits | Length distribution (bp)            | Notes |
|-----|----------------------------------------|------------------|-------------------------------------|-------|
| 131 | <i>Apaloderma vittatum</i>             | 28               | min 117, avg 787, med 295, max 3858 |       |
| 132 | <i>Leptosomus discolor</i>             | 44               | min 128, avg 500, med 267, max 3646 |       |
| 133 | <i>Haliaeetus albicilla</i>            | 52               | min 116, avg 585, med 282, max 4593 |       |
| 134 | <i>Haliaeetus leucocephalus</i>        | 56               | min 85, avg 562, med 274, max 4600  |       |
| 135 | <i>Aquila chrysaetos Canadensis</i>    | 53               | min 127, avg 570, med 301, max 4567 |       |
| 136 | <i>Cathartes aura</i>                  | 66               | min 108, avg 498, med 305, max 4211 |       |
| 137 | <i>Tyto alba</i>                       | 90               | min 75, avg 391, med 269, max 4540  |       |
| 138 | <i>Colius striatus</i>                 | 33               | min 85, avg 664, med 281, max 4391  |       |
| 139 | <i>Charadrius vociferus</i>            | 51               | min 106, avg 558, med 287, max 4520 |       |
| 140 | <i>Balearica regulorum gibbericeps</i> | 51               | min 111, avg 601, med 295, max 4608 |       |
| 141 | <i>Chlamydotis macqueenii</i>          | 46               | min 69, avg 609, med 270, max 4065  |       |
| 142 | <i>Cuculus canorus</i>                 | 33               | min 119, avg 526, med 252, max 3744 |       |
| 143 | <i>Fulmarus glacialis</i>              | 58               | min 70, avg 550, med 280, max 4628  |       |
| 144 | <i>Aptenodytes forsteri</i>            | 67               | min 76, avg 586, med 269, max 4724  |       |
| 145 | <i>Pygoscelis adeliae</i>              | 59               | min 112, avg 628, med 286, max 4834 |       |
| 146 | <i>Phalacrocorax carbo</i>             | 45               | min 109, avg 580, med 292, max 3731 |       |
| 147 | <i>Pelecanus crispus</i>               | 50               | min 121, avg 606, med 279, max 4581 |       |
| 148 | <i>Nipponia nippon</i>                 | 57               | min 76, avg 562, med 277, max 4564  |       |
| 149 | <i>Egretta garzetta</i>                | 50               | min 105, avg 614, med 282, max 4598 |       |
| 150 | <i>Phaethon lepturus</i>               | 43               | min 151, avg 633, med 301, max 4615 |       |
| 151 | <i>Gavia stellata</i>                  | 60               | min 88, avg 567, med 275, max 4577  |       |
| 152 | <i>Tauraco erythrolophus</i>           | 41               | min 115, avg 623, med 289, max 4514 |       |
| 153 | <i>Opisthocomus hoazin</i>             | 65               | min 146, avg 607, med 304, max 4184 |       |
| 154 | <i>Columba livia</i>                   | 46               | min 109, avg 541, med 279, max 4523 |       |
| 155 | <i>Pterocles gutturalis</i>            | 50               | min 106, avg 617, med 279, max 4508 |       |

| No                 | Species                            | # unique L1 hits | Length distribution (bp)              | Notes                                                                                                                                                                                                       |
|--------------------|------------------------------------|------------------|---------------------------------------|-------------------------------------------------------------------------------------------------------------------------------------------------------------------------------------------------------------|
| 156                | <i>Calypte anna</i>                | 24               | min 137, avg 640, med 286, max 3924   |                                                                                                                                                                                                             |
| 157                | <i>Chaetura pelagica</i>           | 24               | min 100, avg 596, med 247, max 4553   |                                                                                                                                                                                                             |
| 158                | <i>Caprimulgus carolinensis</i>    | 62               | min 83, avg 482, med 265, max 4374    |                                                                                                                                                                                                             |
| 159                | <i>Eurypyga helias</i>             | 33               | min 102, avg 525, med 267, max 4514   |                                                                                                                                                                                                             |
| 160                | <i>Mesitornis unicolor</i>         | 34               | min 130, avg 584, med 279, max 4484   |                                                                                                                                                                                                             |
| 161                | <i>Podiceps cristatus</i>          | 43               | min 127, avg 485, med 286, max 4730   |                                                                                                                                                                                                             |
| 162                | <i>Phoenicopterus ruber ruber</i>  | 62               | min 124, avg 540, med 285, max 4626   |                                                                                                                                                                                                             |
| 163                | <i>Alligator mississippiensis</i>  | 2914             | min 72, avg 1505, med 611, max 13520  |                                                                                                                                                                                                             |
| 164                | <i>Alligator sinensis</i>          | 3107             | min 68, avg 1381, med 563, max 8097   |                                                                                                                                                                                                             |
| 165                | <i>Crocodylus porosus</i>          | 2660             | min 82, avg 1234, med 534, max 7709   |                                                                                                                                                                                                             |
| 166                | <i>Gavialis gangeticus</i>         | 2841             | min 73, avg 1272, med 528, max 13044  |                                                                                                                                                                                                             |
| 167                | <i>Pogona vitticeps</i>            | 3592             | min 74, avg 549, med 395, max 4963    |                                                                                                                                                                                                             |
| 168                | <i>Anolis carolinensis</i>         | 2058             | min 82, avg 2400, med 766, max 9160   | Novick et al (2009) found 170 full-length and 626 truncated elements, making up 20 distinct L1 families each with low copy number. Their cutoff length for FL L1s was 5.25kb.                               |
| 169                | <i>Vipera berus berus</i>          | 4171             | min 69, avg 823, med 542, max 5375    |                                                                                                                                                                                                             |
| 170                | <i>Crotalus mitchellii pyrrhus</i> | 3142             | min 76, avg 515, med 378, max 4019    |                                                                                                                                                                                                             |
| 171                | <i>Ophiophagus hannah</i>          | 7777             | min 80, avg 634, med 334, max 5153    |                                                                                                                                                                                                             |
| 172                | <i>Python bivittatus</i>           | 2490             | min 74, avg 979, med 549, max 5737    |                                                                                                                                                                                                             |
| <b>AMPHIBIA</b>    |                                    |                  |                                       |                                                                                                                                                                                                             |
| 173                | <i>Nanorana parkeri</i>            | 1886             | min 74, avg 1321, med 1113, max 5110  |                                                                                                                                                                                                             |
| 174                | <i>Xenopus tropicalis</i>          | 1305             | min 694, avg 2356, med 1836, max 7029 | Kordis et al (2006) found 126 diverse L1 families that contain structurally intact L1s. More than 70 diverse families belong to L1 group C, although they are small in size, e.g. 1-5 members/family found. |
| <b>NEOPTERYGII</b> |                                    |                  |                                       |                                                                                                                                                                                                             |
| 175                | <i>Lepisosteus oculatus</i>        | 176              | min 88, avg 1426, med 759, max 5363   |                                                                                                                                                                                                             |

| No  | Species                         | # unique L1 hits | Length distribution (bp)             | Notes                                                                                                                                                                                   |
|-----|---------------------------------|------------------|--------------------------------------|-----------------------------------------------------------------------------------------------------------------------------------------------------------------------------------------|
| 176 | <i>Anguilla anguilla</i>        | 749              | min 72, avg 790, med 312, max 5766   |                                                                                                                                                                                         |
| 177 | <i>Anguilla japonica</i>        | 864              | min 74, avg 925, med 471, max 5066   |                                                                                                                                                                                         |
| 178 | <i>Danio rerio</i>              | 1566             | min 58, avg 2428, med 1872, max 8441 | Furano et al (2004) found over 30 distinct L1 lineages. Kordis et al (2006) found 59 L1 families.                                                                                       |
| 179 | <i>Astyanax mexicanus</i>       | 361              | min 69, avg 699, med 434, max 4962   |                                                                                                                                                                                         |
| 180 | <i>Oryzias latipes</i>          | 1722             | min 62, avg 937, med 690, max 5918   | Kordis et al (2006) found 17 L1 families. Previously analysed Swimmer1 L1 element (Duvernell and Turner, 1998) is only one of the 17 diverse L1 families that exist here.               |
| 181 | <i>Poecilia formosa</i>         | 476              | min 72, avg 1474, med 947, max 5610  |                                                                                                                                                                                         |
| 182 | <i>Xiphophorus maculatus</i>    | 502              | min 69, avg 1106, med 742, max 5655  |                                                                                                                                                                                         |
| 183 | <i>Fundulus heteroclitus</i>    | 1068             | min 64, avg 1085, med 731, max 5485  | Duvernell et al (2004) used southern blot analyses and PCR to find low copy no, ancient but active L1s. Three lineages: A1 had 16/20 copies with intact ORFs, A2 had 14/17, B had 9/10. |
| 184 | <i>Takifugu flavidus</i>        | 330              | min 77, avg 979, med 591, max 5147   |                                                                                                                                                                                         |
| 185 | <i>Takifugu rubripes</i>        | 263              | min 69, avg 1143, med 568, max 5497  | Kordis et al (2006) found 1 remaining full-length L1                                                                                                                                    |
| 186 | <i>Tetraodon nigroviridis</i>   | 58               | min 73, avg 1725, med 1014, max 5421 | Kordis et al (2006) found 0 L1s                                                                                                                                                         |
| 187 | <i>Cynoglossus semilaevis</i>   | 81               | min 73, avg 780, med 459, max 4385   |                                                                                                                                                                                         |
| 188 | <i>Haplochromis burtoni</i>     | 783              | min 67, avg 1173, med 893, max 6063  |                                                                                                                                                                                         |
| 189 | <i>Pundamilia nyererei</i>      | 802              | min 65, avg 1150, med 919, max 5895  |                                                                                                                                                                                         |
| 190 | <i>Maylandia zebra</i>          | 897              | min 66, avg 1189, med 939, max 6900  |                                                                                                                                                                                         |
| 191 | <i>Neolamprologus brichardi</i> | 789              | min 75, avg 1124, med 833, max 5431  |                                                                                                                                                                                         |
| 192 | <i>Oreochromis niloticus</i>    | 1223             | min 67, avg 1302, med 949, max 6544  |                                                                                                                                                                                         |
| 193 | <i>Sebastes nigrocinctus</i>    | 467              | min 79, avg 852, med 578, max 6241   |                                                                                                                                                                                         |
| 194 | <i>Sebastes rubrivinctus</i>    | 459              | min 74, avg 835, med 547, max 6040   |                                                                                                                                                                                         |
| 195 | <i>Gasterosteus aculeatus</i>   | 179              | min 67, avg 1034, med 488, max 4992  | Kordis et al (2006) found 0 L1s.                                                                                                                                                        |

| No                    | Species                           | # unique L1 hits | Length distribution (bp)             | Notes |
|-----------------------|-----------------------------------|------------------|--------------------------------------|-------|
| 196                   | <i>Gadus morhua</i>               | 913              | min 55, avg 630, med 336, max 5389   |       |
| <b>CHONDRICHTHYES</b> |                                   |                  |                                      |       |
| 197                   | <i>Callorhinchus milii</i>        | 113              | min 81, avg 335, med 353, max 1149   |       |
| 198                   | <i>Carcharhinus brachyurus</i>    | 2426             | min 49, avg 275, med 137, max 5019   |       |
| <b>ECDYSOZOA</b>      |                                   |                  |                                      |       |
| 199                   | <i>Ephemera danica</i>            | 0                | -                                    |       |
| 200                   | <i>Ladona fulva</i>               | 0                | -                                    |       |
| 201                   | <i>Pediculus humanus corporis</i> | 0                | -                                    |       |
| 202                   | <i>Frankliniella occidentalis</i> | 0                | -                                    |       |
| 203                   | <i>Diaphorina citri</i>           | 0                | -                                    |       |
| 204                   | <i>Pachypsylla venusta</i>        | 0                | -                                    |       |
| 205                   | <i>Acyrtosiphon pisum</i>         | 0                | -                                    |       |
| 206                   | <i>Nilaparvata lugens</i>         | 0                | -                                    |       |
| 207                   | <i>Oncopeltus fasciatus</i>       | 0                | -                                    |       |
| 208                   | <i>Rhodnius prolixus</i>          | 0                | -                                    |       |
| 209                   | <i>Cimex lectularius</i>          | 0                | -                                    |       |
| 210                   | <i>Onthophagus taurus</i>         | 0                | -                                    |       |
| 211                   | <i>Agrilus planipennis</i>        | 0                | -                                    |       |
| 212                   | <i>Tribolium castaneum</i>        | 0                | -                                    |       |
| 213                   | <i>Anoplophora glabripennis</i>   | 0                | -                                    |       |
| 214                   | <i>Leptinotarsa decemlineata</i>  | 0                | -                                    |       |
| 215                   | <i>Dendroctonus ponderosae</i>    | 0                | -                                    |       |
| 216                   | <i>Mengenilla moldrzyki</i>       | 0                | -                                    |       |
| 217                   | <i>Aedes aegypti</i>              | 1048             | min 71, avg 2579, med 2518, max 5629 |       |
| 218                   | <i>Culex quinquefasciatus</i>     | 387              | min 100, avg 1975, med 734, max 5491 |       |
| 219                   | <i>Anopheles albimanus</i>        | 39               | min 88, avg 350, med 176, max 3144   |       |
| 220                   | <i>Anopheles arabiensis</i>       | 60               | min 72, avg 399, med 212, max 2169   |       |
| 221                   | <i>Anopheles atroparvus</i>       | 64               | min 74, avg 378, med 163, max 2800   |       |
| 222                   | <i>Anopheles christyi</i>         | 44               | min 89, avg 409, med 210, max 1675   |       |
| 223                   | <i>Anopheles culicifacies</i>     | 40               | min 72, avg 454, med 214, max 3791   |       |
| 224                   | <i>Anopheles darlingi</i>         | 33               | min 71, avg 344, med 170, max 3128   |       |
| 225                   | <i>Anopheles dirus</i>            | 80               | min 88, avg 485, med 359, max 2924   |       |
| 226                   | <i>Anopheles epiroticus</i>       | 51               | min 85, avg 593, med 239, max 4128   |       |
| 227                   | <i>Anopheles farauti</i>          | 58               | min 72, avg 765, med 489, max 4674   |       |

| No  | Species                          | # unique L1 hits | Length distribution (bp)            | Notes                                                                                                                                                                                                                                             |
|-----|----------------------------------|------------------|-------------------------------------|---------------------------------------------------------------------------------------------------------------------------------------------------------------------------------------------------------------------------------------------------|
| 228 | <i>Anopheles funestus</i>        | 41               | min 70, avg 819, med 306, max 4459  |                                                                                                                                                                                                                                                   |
| 229 | <i>Anopheles gambiae</i>         | 67               | min 75, avg 1000, med 403, max 4880 | Biedler and Tu (2003) found 5 divergent L1 families, 2 of which have multiple full-length copies (4 copies of Ag-L1-5, 2 copies of Ag-L1-2). Presumably the other 3 families only have 1 full-length representative (so 9 full-length L1s total). |
| 230 | <i>Anopheles maculatus</i>       | 33               | min 102, avg 846, med 605, max 2325 |                                                                                                                                                                                                                                                   |
| 231 | <i>Anopheles melas</i>           | 43               | min 86, avg 450, med 212, max 3158  |                                                                                                                                                                                                                                                   |
| 232 | <i>Anopheles merus</i>           | 94               | min 79, avg 500, med 236, max 4176  |                                                                                                                                                                                                                                                   |
| 233 | <i>Anopheles minimus</i>         | 38               | min 107, avg 674, med 271, max 3995 |                                                                                                                                                                                                                                                   |
| 234 | <i>Anopheles quadriannulatus</i> | 62               | min 77, avg 395, med 196, max 2472  |                                                                                                                                                                                                                                                   |
| 235 | <i>Anopheles sinensis</i>        | 39               | min 92, avg 902, med 213, max 4275  |                                                                                                                                                                                                                                                   |
| 236 | <i>Anopheles stephensi</i>       | 51               | min 91, avg 530, med 372, max 3220  |                                                                                                                                                                                                                                                   |
| 237 | <i>Mayetiola destructor</i>      | 0                | -                                   |                                                                                                                                                                                                                                                   |
| 238 | <i>Lutzomyia longipalpis</i>     | 0                | -                                   |                                                                                                                                                                                                                                                   |
| 239 | <i>Phlebotomus papatasi</i>      | 0                | -                                   |                                                                                                                                                                                                                                                   |
| 240 | <i>Ceratitis capitata</i>        | 102              | min 70, avg 512, med 325, max 7274  |                                                                                                                                                                                                                                                   |
| 241 | <i>Drosophila albomicans</i>     | 50               | min 73, avg 260, med 136, max 1699  |                                                                                                                                                                                                                                                   |
| 242 | <i>Drosophila ananassae</i>      | 23               | min 68, avg 240, med 179, max 694   |                                                                                                                                                                                                                                                   |
| 243 | <i>Drosophila biarmipes</i>      | 25               | min 78, avg 387, med 225, max 1759  |                                                                                                                                                                                                                                                   |
| 244 | <i>Drosophila bipectinata</i>    | 18               | min 68, avg 508, med 269, max 1503  |                                                                                                                                                                                                                                                   |
| 245 | <i>Drosophila elegans</i>        | 32               | min 63, avg 243, med 186, max 1241  |                                                                                                                                                                                                                                                   |
| 246 | <i>Drosophila erecta</i>         | 24               | min 82, avg 269, med 200, max 956   |                                                                                                                                                                                                                                                   |
| 247 | <i>Drosophila eugracilis</i>     | 25               | min 89, avg 337, med 227, max 1472  |                                                                                                                                                                                                                                                   |
| 248 | <i>Drosophila ficusphila</i>     | 64               | min 88, avg 974, med 342, max 3911  |                                                                                                                                                                                                                                                   |
| 249 | <i>Drosophila grimshawi</i>      | 70               | min 76, avg 190, med 114, max 882   |                                                                                                                                                                                                                                                   |
| 250 | <i>Drosophila kikkawai</i>       | 33               | min 87, avg 289, med 221, max 1311  |                                                                                                                                                                                                                                                   |
| 251 | <i>Drosophila melanogaster</i>   | 16               | min 97, avg 307, med 134, max 2001  |                                                                                                                                                                                                                                                   |

| No  | Species                                       | # unique L1 hits | Length distribution (bp)            | Notes |
|-----|-----------------------------------------------|------------------|-------------------------------------|-------|
| 252 | <i>Drosophila miranda</i>                     | 29               | min 76, avg 307, med 148, max 4515  |       |
| 253 | <i>Drosophila mojavensis</i>                  | 113              | min 68, avg 316, med 210, max 1345  |       |
| 254 | <i>Drosophila persimilis</i>                  | 36               | min 67, avg 196, med 122, max 837   |       |
| 255 | <i>Drosophila pseudoobscura pseudoobscura</i> | 34               | min 70, avg 207, med 157, max 953   |       |
| 256 | <i>Drosophila rhopaloa</i>                    | 18               | min 104, avg 248, med 179, max 1143 |       |
| 257 | <i>Drosophila sechellia</i>                   | 17               | min 92, avg 253, med 225, max 629   |       |
| 258 | <i>Drosophila simulans</i>                    | 19               | min 77, avg 194, med 169, max 531   |       |
| 259 | <i>Drosophila suzukii</i>                     | 37               | min 86, avg 471, med 174, max 5555  |       |
| 260 | <i>Drosophila takahashii</i>                  | 25               | min 96, avg 257, med 180, max 1660  |       |
| 261 | <i>Drosophila virilis</i>                     | 67               | min 69, avg 213, med 125, max 2055  |       |
| 262 | <i>Drosophila willistoni</i>                  | 41               | min 72, avg 213, med 152, max 1050  |       |
| 263 | <i>Drosophila yakuba</i>                      | 22               | min 66, avg 359, med 182, max 2240  |       |
| 264 | <i>Musca domestica</i>                        | 83               | min 84, avg 382, med 269, max 1622  |       |
| 265 | <i>Glossina austeni</i>                       | 143              | min 71, avg 265, med 175, max 1413  |       |
| 266 | <i>Glossina brevipalpis</i>                   | 180              | min 81, avg 307, med 226, max 1358  |       |
| 267 | <i>Glossina fuscipes fuscipes</i>             | 135              | min 69, avg 218, med 146, max 1268  |       |
| 268 | <i>Glossina morsitans morsitans</i>           | 124              | min 72, avg 231, med 151, max 1306  |       |
| 269 | <i>Glossina pallidipes</i>                    | 122              | min 75, avg 228, med 164, max 1505  |       |
| 270 | <i>Limnephilus lunatus</i>                    | 0                | -                                   |       |
| 271 | <i>Papilio glaucus</i>                        | 0                | -                                   |       |
| 272 | <i>Papilio polytes</i>                        | 0                | -                                   |       |
| 273 | <i>Papilio xuthus</i>                         | 0                | -                                   |       |
| 274 | <i>Heliconius melpomene melpomene</i>         | 0                | -                                   |       |
| 275 | <i>Melitaea cinxia</i>                        | 0                | -                                   |       |
| 276 | <i>Danaus plexippus</i>                       | 0                | -                                   |       |
| 277 | <i>Bombyx mori</i>                            | 0                | -                                   |       |
| 278 | <i>Manduca sexta</i>                          | 0                | -                                   |       |
| 279 | <i>Plutella xylostella</i>                    | 0                | -                                   |       |
| 280 | <i>Athalia rosae</i>                          | 0                | -                                   |       |
| 281 | <i>Cephus cinctus</i>                         | 0                | -                                   |       |
| 282 | <i>Orussus abietinus</i>                      | 20               | min 89, avg 299, med 234, max 1082  |       |

| No  | Species                             | # unique L1 hits | Length distribution (bp)             | Notes |
|-----|-------------------------------------|------------------|--------------------------------------|-------|
| 283 | <i>Ceratosolen solmsi marchali</i>  | 0                | -                                    |       |
| 284 | <i>Nasonia giraulti</i>             | 0                | -                                    |       |
| 285 | <i>Nasonia longicornis</i>          | 0                | -                                    |       |
| 286 | <i>Nasonia vitripennis</i>          | 0                | -                                    |       |
| 287 | <i>Copidosoma floridanum</i>        | 0                | -                                    |       |
| 288 | <i>Trichogramma pretiosum</i>       | 0                | -                                    |       |
| 289 | <i>Microplitis demolitor</i>        | 69               | min 88, avg 676, med 799, max 1396   |       |
| 290 | <i>Megachile rotundata</i>          | 0                | -                                    |       |
| 291 | <i>Apis dorsata</i>                 | 0                | -                                    |       |
| 292 | <i>Apis florea</i>                  | 0                | -                                    |       |
| 293 | <i>Apis mellifera</i>               | 0                | -                                    |       |
| 294 | <i>Bombus impatiens</i>             | 0                | -                                    |       |
| 295 | <i>Bombus terrestris</i>            | 0                | -                                    |       |
| 296 | <i>Linepithema humile</i>           | 0                | -                                    |       |
| 297 | <i>Camponotus floridanus</i>        | 0                | -                                    |       |
| 298 | <i>Acromyrmex echinator</i>         | 0                | -                                    |       |
| 299 | <i>Atta cephalotes</i>              | 0                | -                                    |       |
| 300 | <i>Solenopsis invicta</i>           | 0                | -                                    |       |
| 301 | <i>Pogonomyrmex barbatus</i>        | 0                | -                                    |       |
| 302 | <i>Harpegnathos saltator</i>        | 0                | -                                    |       |
| 303 | <i>Cerapachys biroi</i>             | 0                | -                                    |       |
| 304 | <i>Blattella germanica</i>          | 955              | min 72, avg 429, med 223, max 3360   |       |
| 305 | <i>Zootermopsis nevadensis</i>      | 29               | min 87, avg 476, med 231, max 2199   |       |
| 306 | <i>Daphnia pulex</i>                | 27               | min 83, avg 1241, med 357, max 4805  |       |
| 307 | <i>Eurytemora affinis</i>           | 277              | min 85, avg 439, med 310, max 3719   |       |
| 308 | <i>Hyalella azteca</i>              | 137              | min 83, avg 281, med 225, max 1526   |       |
| 309 | <i>Strigamia maritima</i>           | 0                | -                                    |       |
| 310 | <i>Stegodyphus mimosarum</i>        | 0                | -                                    |       |
| 311 | <i>Latrodectus hesperus</i>         | 78               | min 74, avg 530, med 618, max 1100   |       |
| 312 | <i>Parasteatoda tepidariorum</i>    | 0                | -                                    |       |
| 313 | <i>Tetranychus urticae</i>          | 0                | -                                    |       |
| 314 | <i>Dermatophagoides farinae</i>     | 0                | -                                    |       |
| 315 | <i>Sarcoptes scabiei type canis</i> | 0                | -                                    |       |
| 316 | <i>Achipteria coleoptrata</i>       | 0                | -                                    |       |
| 317 | <i>Hypochthonius rufulus</i>        | 0                | -                                    |       |
| 318 | <i>Platymothrus peltifer</i>        | 0                | -                                    |       |
| 319 | <i>Steganacarus magnus</i>          | 0                | -                                    |       |
| 320 | <i>Ixodes ricinus</i>               | 446              | min 70, avg 1137, med 1042, max 3194 |       |
| 321 | <i>Ixodes scapularis</i>            | 1106             | min 72, avg 1101, med 975, max 3447  |       |



| No                     | Species                               | # unique L1 hits | Length distribution (bp)            | Notes |
|------------------------|---------------------------------------|------------------|-------------------------------------|-------|
| 322                    | <i>Rhipicephalus microplus</i>        | 88               | min 182, avg 923, med 771, max 2946 |       |
| 323                    | <i>Metaseiulus occidentalis</i>       | 34               | min 96, avg 604, med 371, max 1334  |       |
| 324                    | <i>Varroa destructor</i>              | 0                | -                                   |       |
| 325                    | <i>Centruroides exilicauda</i>        | 65               | min 71, avg 640, med 492, max 2400  |       |
| 326                    | <i>Mesobuthus martensii</i>           | 0                | -                                   |       |
| 327                    | <i>Limulus polyphemus</i>             | 145              | min 65, avg 712, med 409, max 3393  |       |
| 328                    | <i>Trichinella spiralis</i>           | 14               | min 79, avg 466, med 160, max 1326  |       |
| 329                    | <i>Ascaris suum</i>                   | 0                | -                                   |       |
| 330                    | <i>Elaeophora elaphi</i>              | 0                | -                                   |       |
| 331                    | <i>Onchocerca volvulus</i>            | 0                | -                                   |       |
| 332                    | <i>Steinernema monticolum</i>         | 0                | -                                   |       |
| 333                    | <i>Panagrellus redivivus</i>          | 0                | -                                   |       |
| 334                    | <i>Haemonchus contortus</i>           | 0                | -                                   |       |
| 335                    | <i>Necator americanus</i>             | 0                | -                                   |       |
| 336                    | <i>Heterorhabditis bacteriophora</i>  | 0                | -                                   |       |
| 337                    | <i>Caenorhabditis angaria</i>         | 0                | -                                   |       |
| 338                    | <i>Caenorhabditis brenneri</i>        | 0                | -                                   |       |
| 339                    | <i>Caenorhabditis briggsae</i>        | 0                | -                                   |       |
| 340                    | <i>Caenorhabditis elegans</i>         | 0                | -                                   |       |
| 341                    | <i>Caenorhabditis japonica</i>        | 0                | -                                   |       |
| 342                    | <i>Caenorhabditis sp. 11 MAF-2010</i> | 0                | -                                   |       |
| 343                    | <i>Priapulus caudatus</i>             | 0                | -                                   |       |
| <b>ROTIFERA</b>        |                                       |                  |                                     |       |
| 344                    | <i>Adineta vaga</i>                   | 23               | min 111, avg 415, med 371, max 999  |       |
| <b>PLATYHELMINTHES</b> |                                       |                  |                                     |       |
| 345                    | <i>Schistosoma curassoni</i>          | 170              | min 52, avg 356, med 63, max 2248   |       |
| 346                    | <i>Schistosoma haematobium</i>        | 151              | min 50, avg 229, med 61, max 2059   |       |
| 347                    | <i>Schistosoma japonicum</i>          | 83               | min 58, avg 824, med 526, max 6036  |       |
| 348                    | <i>Schistosoma mansoni</i>            | 96               | min 54, avg 181, med 61, max 2924   |       |
| 349                    | <i>Schistosoma margrebowiei</i>       | 136              | min 50, avg 171, med 61, max 3942   |       |
| 350                    | <i>Schistosoma mattheei</i>           | 120              | min 51, avg 394, med 61, max 5065   |       |
| 351                    | <i>Schistosoma rodhaini</i>           | 94               | min 51, avg 316, med 62, max 4927   |       |
| 352                    | <i>Clonorchis sinensis</i>            | 213              | min 104, avg 216, med 208, max 2207 |       |
| 353                    | <i>Echinococcus granulosus</i>        | 0                | -                                   |       |

| No                   | Species                                    | # unique L1 hits | Length distribution (bp)             | Notes                                                               |
|----------------------|--------------------------------------------|------------------|--------------------------------------|---------------------------------------------------------------------|
| 354                  | <i>Echinococcus multilocularis</i>         | 0                | -                                    |                                                                     |
| 355                  | <i>Hymenolepis microstoma</i>              | 0                | -                                    |                                                                     |
| <b>ANNELIDA</b>      |                                            |                  |                                      |                                                                     |
| 356                  | <i>Capitella teleta</i>                    | 10               | min 89, avg 252, med 193, max 452    |                                                                     |
| 357                  | <i>Helobdella robusta</i>                  | 360              | min 70, avg 335, med 270, max 1371   |                                                                     |
| <b>MOLLUSCA</b>      |                                            |                  |                                      |                                                                     |
| 358                  | <i>Crassostrea gigas</i>                   | 371              | min 77, avg 2068, med 1888, max 6771 |                                                                     |
| 359                  | <i>Lottia gigantea</i>                     | 81               | min 226, avg 760, med 634, max 3303  |                                                                     |
| 360                  | <i>Aplysia californica</i>                 | 1609             | min 78, avg 277, med 207, max 2722   |                                                                     |
| 361                  | <i>Biomphalaria glabrata</i>               | 532              | min 80, avg 350, med 198, max 3280   |                                                                     |
| <b>CNIDARIA</b>      |                                            |                  |                                      |                                                                     |
| 362                  | <i>Nematostella vectensis</i>              | 35               | min 109, avg 1664, med 938, max 5309 |                                                                     |
| 363                  | <i>Hydra vulgaris</i>                      | 317              | min 73, avg 1523, med 336, max 5900  |                                                                     |
| <b>TENTACULATA</b>   |                                            |                  |                                      |                                                                     |
| 364                  | <i>Mnemiopsis leidyi</i>                   | 0                | -                                    |                                                                     |
| <b>PLACOZOA</b>      |                                            |                  |                                      |                                                                     |
| 365                  | <i>Trichoplax adhaerens</i>                | 0                | -                                    |                                                                     |
| <b>PORIFERA</b>      |                                            |                  |                                      |                                                                     |
| 366                  | <i>Amphimedon queenslandica</i>            | 0                | -                                    |                                                                     |
| <b>VIRIDIPLANTAE</b> |                                            |                  |                                      |                                                                     |
| 367                  | <i>Micromonas pusilla</i><br>CCMP1545      | 0                | -                                    |                                                                     |
| 368                  | <i>Micromonas</i> sp. RCC299               | 0                | -                                    |                                                                     |
| 369                  | <i>Ostreococcus lucimarinus</i><br>CCE9901 | 0                | -                                    |                                                                     |
| 370                  | <i>Ostreococcus tauri</i>                  | 0                | -                                    |                                                                     |
| 371                  | <i>Chlamydomonas reinhardtii</i>           | 72               | min 69, avg 1438, med 1100, max 6259 |                                                                     |
| 372                  | <i>Volvox carteri</i> f. nagariensis       | 109              | min 75, avg 1777, med 1239, max 8376 |                                                                     |
| 373                  | <i>Chlorella variabilis</i>                | 9                | min 72, avg 516, med 280, max 1388   |                                                                     |
| 374                  | <i>Auxenochlorella protothecoides</i>      | 0                | -                                    |                                                                     |
| 375                  | <i>Helicosporidium</i> sp.<br>ATCC 50920   | 0                | -                                    |                                                                     |
| 376                  | <i>Coccomyxa subellipsoidea</i><br>C-169   | 60               | min 71, avg 2429, med 404, max 8994  | Very similar to L1-like Zepp element from <i>Chlorella vulgaris</i> |
| 377                  | <i>Klebsormidium flaccidum</i>             | 0                | -                                    |                                                                     |

| No  | Species                                  | # unique L1 hits | Length distribution (bp)              | Notes |
|-----|------------------------------------------|------------------|---------------------------------------|-------|
| 378 | <i>Physcomitrella patens</i>             | 47               | min 82, avg 464, med 277, max 875     |       |
| 379 | <i>Selaginella moellendorffii</i>        | 55               | min 82, avg 4027, med 1177, max 17033 |       |
| 380 | <i>Pinus taeda</i>                       | 1083             | min 66, avg 2105, med 1298, max 5806  |       |
| 381 | <i>Amborella trichopoda</i>              | 2219             | min 91, avg 1781, med 938, max 7437   |       |
| 382 | <i>Spirodela polyrhiza</i>               | 48               | min 121, avg 2080, med 1705, max 3958 |       |
| 383 | <i>Phoenix dactylifera</i>               | 2657             | min 46, avg 1445, med 1034, max 4620  |       |
| 384 | <i>Elaeis oleifera</i>                   | 1125             | min 80, avg 1924, med 1367, max 4405  |       |
| 385 | <i>Ensete ventricosum</i>                | 8                | min 631, avg 1122, med 1141, max 1448 |       |
| 386 | <i>Musa acuminata subsp. malaccensis</i> | 212              | min 85, avg 1222, med 1246, max 2648  |       |
| 387 | <i>Sorghum bicolor</i>                   | 1189             | min 80, avg 2607, med 2291, max 7857  |       |
| 388 | <i>Zea mays</i>                          | 1891             | min 50, avg 2749, med 2605, max 7283  |       |
| 389 | <i>Setaria italica</i>                   | 937              | min 62, avg 2412, med 2348, max 7323  |       |
| 390 | <i>Brachypodium distachyon</i>           | 774              | min 129, avg 2171, med 2033, max 7282 |       |
| 391 | <i>Leersia perrieri</i>                  | 567              | min 194, avg 2008, med 1900, max 6583 |       |
| 392 | <i>Oryza barthii</i>                     | 705              | min 46, avg 1876, med 1405, max 7342  |       |
| 393 | <i>Oryza brachyantha</i>                 | 180              | min 94, avg 1862, med 1422, max 5902  |       |
| 394 | <i>Oryza glumipatula</i>                 | 673              | min 79, avg 1720, med 1215, max 7736  |       |
| 395 | <i>Oryza longistaminata</i>              | 929              | min 50, avg 1390, med 835, max 7116   |       |
| 396 | <i>Oryza meridionalis</i>                | 602              | min 70, avg 1631, med 1324, max 7197  |       |
| 397 | <i>Oryza nivara</i>                      | 747              | min 74, avg 1760, med 1362, max 7342  |       |
| 398 | <i>Oryza punctata</i>                    | 604              | min 96, avg 2028, med 1657, max 7473  |       |
| 399 | <i>Oryza sativa Japonica Group</i>       | 823              | min 82, avg 2019, med 1552, max 7409  |       |
| 400 | <i>Zizania latifolia</i>                 | 716              | min 88, avg 1748, med 1772, max 5345  |       |
| 401 | <i>Aegilops tauschii</i>                 | 8443             | min 78, avg 2139, med 2087, max 7683  |       |
| 402 | <i>Triticum urartu</i>                   | 8617             | min 78, avg 2134, med 2050, max 8407  |       |

| No  | Species                               | # unique L1 hits | Length distribution (bp)              | Notes |
|-----|---------------------------------------|------------------|---------------------------------------|-------|
| 403 | <i>Nelumbo nucifera</i>               | 4701             | min 109, avg 1691, med 1046, max 7648 |       |
| 404 | <i>Lupinus angustifolius</i>          | 1104             | min 116, avg 2082, med 1711, max 5768 |       |
| 405 | <i>Phaseolus vulgaris</i>             | 1585             | min 58, avg 1764, med 1570, max 5861  |       |
| 406 | <i>Cajanus cajan</i>                  | 629              | min 87, avg 1361, med 1049, max 5410  |       |
| 407 | <i>Vigna angularis var. angularis</i> | 133              | min 89, avg 404, med 353, max 2875    |       |
| 408 | <i>Vigna radiata var. radiata</i>     | 207              | min 76, avg 384, med 302, max 3013    |       |
| 409 | <i>Glycine max</i>                    | 1755             | min 73, avg 2328, med 1810, max 6483  |       |
| 410 | <i>Glycine soja</i>                   | 2146             | min 83, avg 1995, med 1171, max 11768 |       |
| 411 | <i>Cicer arietinum</i>                | 459              | min 81, avg 884, med 467, max 5029    |       |
| 412 | <i>Medicago truncatula</i>            | 355              | min 106, avg 2092, med 1632, max 7369 |       |
| 413 | <i>Trifolium pratense</i>             | 1496             | min 113, avg 778, med 438, max 5762   |       |
| 414 | <i>Lotus japonicus</i>                | 819              | min 82, avg 1181, med 1076, max 3912  |       |
| 415 | <i>Malus x domestica</i>              | 520              | min 82, avg 2278, med 1954, max 6604  |       |
| 416 | <i>Pyrus x bretschneideri</i>         | 676              | min 94, avg 2119, med 1364, max 6700  |       |
| 417 | <i>Prunus mume</i>                    | 361              | min 72, avg 1554, med 920, max 5952   |       |
| 418 | <i>Prunus persica</i>                 | 280              | min 97, avg 1819, med 1151, max 5749  |       |
| 419 | <i>Fragaria iinumae</i>               | 506              | min 76, avg 821, med 554, max 6012    |       |
| 420 | <i>Fragaria nubicola</i>              | 744              | min 81, avg 692, med 502, max 4773    |       |
| 421 | <i>Fragaria orientalis</i>            | 1046             | min 72, avg 558, med 443, max 5421    |       |
| 422 | <i>Fragaria vesca subsp. vesca</i>    | 474              | min 82, avg 1298, med 862, max 6199   |       |
| 423 | <i>Fragaria x ananassa</i>            | 581              | min 90, avg 591, med 355, max 6013    |       |
| 424 | <i>Morus notabilis</i>                | 679              | min 89, avg 485, med 266, max 3999    |       |
| 425 | <i>Cannabis sativa</i>                | 1950             | min 106, avg 1321, med 1091, max 5132 |       |
| 426 | <i>Castanea mollissima</i>            | 2591             | min 74, avg 1850, med 1680, max 4424  |       |
| 427 | <i>Betula nana</i>                    | 2085             | min 79, avg 939, med 528, max 4513    |       |

| No  | Species                                          | # unique L1 hits | Length distribution (bp)              | Notes |
|-----|--------------------------------------------------|------------------|---------------------------------------|-------|
| 428 | <i>Cucumis melo</i>                              | 655              | min 74, avg 1364, med 1122, max 3798  |       |
| 429 | <i>Cucumis sativus</i>                           | 515              | min 95, avg 1006, med 853, max 3316   |       |
| 430 | <i>Citrullus lanatus</i>                         | 589              | min 70, avg 1040, med 790, max 4358   |       |
| 431 | <i>Lagenaria siceraria</i>                       | 521              | min 74, avg 472, med 351, max 2144    |       |
| 432 | <i>Populus euphratica</i>                        | 448              | min 64, avg 2509, med 2200, max 6319  |       |
| 433 | <i>Populus trichocarpa</i>                       | 528              | min 76, avg 1983, med 1518, max 6523  |       |
| 434 | <i>Jatropha curcas</i>                           | 422              | min 121, avg 1715, med 1260, max 5478 |       |
| 435 | <i>Manihot esculenta subsp. flabellifolia</i>    | 630              | min 74, avg 1155, med 748, max 5083   |       |
| 436 | <i>Ricinus communis</i>                          | 144              | min 90, avg 1089, med 672, max 3638   |       |
| 437 | <i>Linum usitatissimum</i>                       | 427              | min 69, avg 762, med 471, max 5346    |       |
| 438 | <i>Eucalyptus camaldulensis</i>                  | 3599             | min 83, avg 1330, med 933, max 6573   |       |
| 439 | <i>Eucalyptus grandis</i>                        | 2590             | min 75, avg 1851, med 1421, max 5972  |       |
| 440 | <i>Carica papaya</i>                             | 910              | min 89, avg 1584, med 1290, max 6410  |       |
| 441 | <i>Arabidopsis halleri subsp. gemmifera</i>      | 2489             | min 69, avg 799, med 146, max 7434    |       |
| 442 | <i>Arabidopsis lyrata subsp. lyrata</i>          | 827              | min 89, avg 2534, med 2698, max 6932  |       |
| 443 | <i>Arabidopsis thaliana</i>                      | 260              | min 77, avg 2468, med 2324, max 6834  |       |
| 444 | <i>Camelina sativa</i>                           | 3335             | min 85, avg 2315, med 2368, max 6430  |       |
| 445 | <i>Capsella rubella</i>                          | 272              | min 120, avg 3028, med 3152, max 6249 |       |
| 446 | <i>Brassica napus</i>                            | 3927             | min 75, avg 2830, med 2963, max 8479  |       |
| 447 | <i>Brassica oleracea var. oleracea</i>           | 3041             | min 82, avg 1915, med 1807, max 6121  |       |
| 448 | <i>Brassica rapa</i>                             | 1853             | min 73, avg 1787, med 1321, max 6125  |       |
| 449 | <i>Raphanus raphanistrum subsp. raphanistrum</i> | 1419             | min 76, avg 2388, med 2265, max 5996  |       |
| 450 | <i>Raphanus sativus</i>                          | 1595             | min 77, avg 2945, med 3131, max 6103  |       |
| 451 | <i>Aethionema arabicum</i>                       | 1063             | min 70, avg 2004, med 1872, max 5667  |       |
| 452 | <i>Arabis alpina</i>                             | 1528             | min 102, avg 2624, med 2829, max 6298 |       |

| No  | Species                              | # unique L1 hits | Length distribution (bp)               | Notes |
|-----|--------------------------------------|------------------|----------------------------------------|-------|
| 453 | <i>Eutrema parvulum</i>              | 300              | min 84, avg 2741, med 2690, max 6073   |       |
| 454 | <i>Eutrema salsugineum</i>           | 863              | min 80, avg 3026, med 3232, max 6363   |       |
| 455 | <i>Sisymbrium irio</i>               | 991              | min 79, avg 2459, med 2455, max 6116   |       |
| 456 | <i>Leavenworthia alabamica</i>       | 306              | min 100, avg 2175, med 2169, max 5965  |       |
| 457 | <i>Tarenaya hassleriana</i>          | 239              | min 91, avg 1731, med 1562, max 4214   |       |
| 458 | <i>Gossypium arboreum</i>            | 2831             | min 70, avg 1508, med 1099, max 5838   |       |
| 459 | <i>Gossypium raimondii</i>           | 1571             | min 95, avg 1545, med 1183, max 5724   |       |
| 460 | <i>Theobroma cacao</i>               | 574              | min 136, avg 1601, med 952, max 6934   |       |
| 461 | <i>Aquilaria agallochum</i>          | 635              | min 93, avg 1191, med 961, max 3700    |       |
| 462 | <i>Azadirachta indica</i>            | 206              | min 82, avg 1261, med 911, max 5194    |       |
| 463 | <i>Citrus clementine</i>             | 767              | min 77, avg 1658, med 1044, max 5614   |       |
| 464 | <i>Citrus sinensis</i>               | 880              | min 74, avg 1543, med 951, max 5711    |       |
| 465 | <i>Vitis vinifera</i>                | 2505             | min 80, avg 2821, med 2758, max 6488   |       |
| 466 | <i>Amaranthus hypochondriacus</i>    | 1901             | min 94, avg 659, med 472, max 4869     |       |
| 467 | <i>Amaranthus tuberculatus</i>       | 102              | min 167, avg 254, med 229, max 948     |       |
| 468 | <i>Beta vulgaris subsp. vulgaris</i> | 2302             | min 64, avg 2311, med 2317, max 6948   |       |
| 469 | <i>Spinacia oleracea</i>             | 1623             | min 112, avg 1650, med 1250, max 6337  |       |
| 470 | <i>Dianthus caryophyllus</i>         | 1242             | min 106, avg 1604, med 1378, max 4045  |       |
| 471 | <i>Actinidia chinensis</i>           | 839              | min 70, avg 1488, med 1100, max 5954   |       |
| 472 | <i>Vaccinium macrocarpon</i> 1       | 1035             | min 93, avg 894, med 597, max 3606     |       |
| 473 | <i>Diospyros lotus</i>               | 1                | min 1950, avg 1950, med 1950, max 1950 |       |
| 474 | <i>Primula veris</i>                 | 231              | min 143, avg 1488, med 1318, max 3967  |       |
| 475 | <i>Solanum arcanum</i>               | 2319             | min 65, avg 2193, med 1442, max 16602  |       |
| 476 | <i>Solanum habrochaites</i>          | 2635             | min 64, avg 2162, med 1354, max 14525  |       |
| 477 | <i>Solanum lycopersicum</i>          | 2026             | min 52, avg 2154, med 1456, max 28999  |       |

| No                   | Species                              | # unique L1 hits | Length distribution (bp)               | Notes                                                                         |
|----------------------|--------------------------------------|------------------|----------------------------------------|-------------------------------------------------------------------------------|
| 478                  | <i>Solanum melongena</i>             | 2627             | min 61, avg 1733, med 1263, max 10878  |                                                                               |
| 479                  | <i>Solanum pennellii</i>             | 2383             | min 60, avg 2084, med 1363, max 16789  |                                                                               |
| 480                  | <i>Solanum pimpinellifolium</i>      | 3875             | min 43, avg 1327, med 800, max 16052   |                                                                               |
| 481                  | <i>Solanum tuberosum</i>             | 3069             | min 64, avg 1743, med 1130, max 16344  |                                                                               |
| 482                  | <i>Capsicum annuum</i>               | 7907             | min 65, avg 1952, med 1708, max 6394   |                                                                               |
| 483                  | <i>Nicotiana glauca</i>              | 5887             | min 55, avg 1991, med 1739, max 6385   |                                                                               |
| 484                  | <i>Nicotiana tomentosiformis</i>     | 4522             | min 55, avg 1978, med 1586, max 6290   |                                                                               |
| 485                  | <i>Fraxinus excelsior</i>            | 1257             | min 77, avg 1662, med 1348, max 4845   |                                                                               |
| 486                  | <i>Penstemon centranthifolius</i>    | 14               | min 207, avg 945, med 799, max 2734    |                                                                               |
| 487                  | <i>Penstemon grinnellii</i>          | 14               | min 120, avg 748, med 614, max 1452    |                                                                               |
| 488                  | <i>Sesamum indicum</i>               | 1190             | min 64, avg 1457, med 1304, max 4552   |                                                                               |
| 489                  | <i>Genlisea aurea</i>                | 27               | min 121, avg 1325, med 1211, max 2901  |                                                                               |
| 490                  | <i>Mimulus guttatus</i>              | 414              | min 86, avg 2057, med 1900, max 5583   |                                                                               |
| 491                  | <i>Conyza canadensis</i>             | 316              | min 99, avg 1276, med 1260, max 3276   |                                                                               |
| <b>ECHINOIDEA</b>    |                                      |                  |                                        |                                                                               |
| 492                  | <i>Lytechinus variegatus</i>         | 1544             | min 73, avg 655, med 437, max 4376     |                                                                               |
| 493                  | <i>Strongylocentrotus purpuratus</i> | 2711             | min 42, avg 660, med 347, max 6094     | Kordis et al (2006) showed they have more diversity than <i>Ciona</i> species |
| <b>ASTEROIDEA</b>    |                                      |                  |                                        |                                                                               |
| 494                  | <i>Patiria miniata</i>               | 68               | min 72, avg 1592, med 1548, max 3988   |                                                                               |
| <b>ENTEROPNEUSTA</b> |                                      |                  |                                        |                                                                               |
| 495                  | <i>Saccoglossus kowalevskii</i>      | 629              | min 76, avg 1554, med 1016, max 6255   |                                                                               |
| <b>TUNICATA</b>      |                                      |                  |                                        |                                                                               |
| 496                  | <i>Ciona intestinalis</i>            | 9                | min 104, avg 1354, med 749, max 4593   | Kordis et al (2006)                                                           |
| 497                  | <i>Ciona savignyi</i>                | 671              | min 128, avg 2967, med 1814, max 11990 | Kordis et al (2006) found 5-6 low copy number families                        |
| 498                  | <i>Botryllus schlosseri</i>          | 14               | min 109, avg 724, med 253, max 3617    |                                                                               |
| 499                  | <i>Oikopleura dioica</i>             | 0                | -                                      |                                                                               |
| <b>LEPTOCARDII</b>   |                                      |                  |                                        |                                                                               |

| No                        | Species                          | # unique L1 hits | Length distribution (bp)             | Notes                                                                  |
|---------------------------|----------------------------------|------------------|--------------------------------------|------------------------------------------------------------------------|
| 500                       | <i>Branchiostoma floridae</i>    | 174              | min 71, avg 1628, med 1098, max 5842 | 40 diverse families (Kordis et al, 2006)                               |
| <b>CEPHALASPIDOMORPHI</b> |                                  |                  |                                      |                                                                        |
| 501                       | <i>Lethenteron camtschaticum</i> | 262              | min 74, avg 1367, med 911, max 6536  |                                                                        |
| 502                       | <i>Petromyzon marinus</i>        | 137              | min 65, avg 2554, med 1617, max 7409 | Kordis et al (2006) found complete absence of L1 retrotransposons here |
| <b>SARCOPTERYGII</b>      |                                  |                  |                                      |                                                                        |
| 503                       | <i>Latimeria chalumnae</i>       | 3721             | min 66, avg 1680, med 827, max 12520 |                                                                        |



## 3.2 Dead or alive - how many L1s have retained their activity?

### 3.2.1 Table 6: ORF content of L1s in the genome

Table 6: **L1 open reading frame content:** For each species that exhibited L1 presence (407 species out of 503), we categorised the L1s based on whether they had both ORFs intact, only ORF1 intact, only ORF2 intact, or no ORFs intact ('intact-ness' is defined in Fig 4). Both full-length elements and fragments were screened for ORFs because some species appear to have fragment L1s which still contain intact ORF1 or ORF2 regions. Both 'confirmed ORF1' and 'probable ORF1' (see explanation in main text) are included in the ORF1 calculations. Note that many of the sequences without ORFs are still full-length - however, the ORF1 and/or ORF2 regions could not be confirmed as 'intact', based on our criteria.

| Species                               | Both ORFs | ORF1 only | ORF2 only | No ORFs |
|---------------------------------------|-----------|-----------|-----------|---------|
| <b>MAMMALIA</b>                       |           |           |           |         |
| <i>Monodelphis domestica</i>          | 194       | 4459      | 1607      | 84310   |
| <i>Macropus eugenii</i>               | 0         | 360       | 0         | 119356  |
| <i>Sarcophilus harrisii</i>           | 0         | 141       | 0         | 117740  |
| <i>Dasyurus novemcinctus</i>          | 42        | 3636      | 57        | 196698  |
| <i>Choloepus hoffmanni</i>            | 4         | 7898      | 39        | 158883  |
| <i>Chrysochloris asiatica</i>         | 0         | 122       | 0         | 58210   |
| <i>Echinops telfairi</i>              | 0         | 94        | 0         | 22463   |
| <i>Orycteropus afer afer</i>          | 0         | 437       | 0         | 123396  |
| <i>Elephantulus edwardii</i>          | 0         | 337       | 0         | 64166   |
| <i>Trichechus manatus latirostris</i> | 0         | 533       | 0         | 142446  |
| <i>Procavia capensis</i>              | 2         | 2926      | 13        | 153253  |
| <i>Loxodonta africana</i>             | 228       | 3835      | 451       | 110471  |
| <i>Erinaceus europaeus</i>            | 0         | 185       | 0         | 35532   |
| <i>Sorex araneus</i>                  | 0         | 466       | 0         | 61335   |
| <i>Condylura cristata</i>             | 0         | 114       | 0         | 21126   |
| <i>Pteropus alecto</i>                | 0         | 106       | 0         | 94911   |
| <i>Pteropus vampyrus</i>              | 0         | 148       | 0         | 85182   |
| <i>Eidolon helvum</i>                 | 0         | 6         | 0         | 67364   |
| <i>Megaderma lyra</i>                 | 0         | 1         | 0         | 57558   |
| <i>Rhinolophus ferrumequinum</i>      | 0         | 6         | 0         | 75259   |
| <i>Pteronotus parnellii</i>           | 0         | 18        | 0         | 68612   |
| <i>Eptesicus fuscus</i>               | 0         | 248       | 0         | 65985   |
| <i>Myotis brandtii</i>                | 261       | 3211      | 201       | 82274   |
| <i>Myotis davidii</i>                 | 0         | 196       | 0         | 73910   |
| <i>Myotis lucifugus</i>               | 75        | 3031      | 65        | 79104   |
| <i>Ceratotherium simum simum</i>      | 0         | 828       | 0         | 111778  |
| <i>Equus przewalskii</i>              | 27        | 709       | 82        | 114018  |
| <i>Equus caballus</i> (Thoroughbred)  | 191       | 1588      | 132       | 84895   |
| <i>Equus caballus</i> (Mongolian)     | 0         | 129       | 0         | 113417  |
| <i>Manis pentadactyla</i>             | 14        | 1240      | 34        | 129448  |
| <i>Felis catus</i>                    | 1         | 1074      | 1         | 80981   |
| <i>Panthera tigris altaica</i>        | 423       | 943       | 258       | 122678  |
| <i>Canis lupus familiaris</i>         | 424       | 2786      | 174       | 87863   |
| <i>Ursus maritimus</i>                | 738       | 1622      | 343       | 112029  |

| Species                                         | Both ORFs | ORF1 only | ORF2 only | No ORFs |
|-------------------------------------------------|-----------|-----------|-----------|---------|
| <i>Ailuropoda melanoleuca</i>                   | 1200      | 2401      | 477       | 107267  |
| <i>Leptonychotes weddellii</i>                  | 0         | 283       | 0         | 123392  |
| <i>Odobenus rosmarus divergens</i>              | 0         | 653       | 1         | 131117  |
| <i>Mustela putorius furo</i>                    | 0         | 706       | 0         | 114495  |
| <i>Camelus dromedarius</i>                      | 326       | 677       | 186       | 107671  |
| <i>Camelus ferus</i>                            | 1         | 494       | 49        | 106290  |
| <i>Vicugna pacos</i>                            | 0         | 519       | 0         | 139626  |
| <i>Sus scrofa</i> (Duroc)                       | 193       | 2737      | 209       | 103379  |
| <i>Sus scrofa</i> (Tibetan)                     | 196       | 1635      | 258       | 151885  |
| <i>Sus scrofa</i> (Ellegaard Gottingen minipig) | 20        | 829       | 140       | 142084  |
| <i>Balaenoptera acutorostrata scammoni</i>      | 4036      | 2443      | 1338      | 152546  |
| <i>Physeter catodon</i>                         | 0         | 870       | 0         | 154039  |
| <i>Lipotes vexillifer</i>                       | 972       | 2663      | 372       | 157494  |
| <i>Tursiops truncatus</i>                       | 0         | 458       | 0         | 203768  |
| <i>Orcinus orca</i>                             | 0         | 1087      | 1         | 162421  |
| <i>Pantholops hodgsonii</i>                     | 909       | 1895      | 433       | 100036  |
| <i>Capra hircus</i>                             | 0         | 434       | 0         | 80098   |
| <i>Ovis aries</i> (Texel)                       | 784       | 3146      | 516       | 64077   |
| <i>Ovis aries musimon</i>                       | 0         | 417       | 0         | 94162   |
| <i>Bubalus bubalis</i>                          | 0         | 840       | 0         | 148033  |
| <i>Bison bison bison</i>                        | 0         | 1732      | 7         | 163961  |
| <i>Bos mutus</i>                                | 103       | 1550      | 207       | 104810  |
| <i>Bos indicus</i>                              | 167       | 2454      | 140       | 70711   |
| <i>Bos taurus</i>                               | 49        | 2741      | 98        | 77633   |
| <i>Ochotona princeps</i>                        | 0         | 65        | 0         | 22233   |
| <i>Oryctolagus cuniculus</i>                    | 219       | 2894      | 164       | 51094   |
| <i>Ictidomys tridecemlineatus</i>               | 0         | 123       | 0         | 76954   |
| <i>Heterocephalus glaber</i>                    | 0         | 291       | 0         | 68554   |
| <i>Fukomys damarensis</i>                       | 415       | 635       | 199       | 59287   |
| <i>Cavia aperea</i>                             | 72        | 6288      | 78        | 76014   |
| <i>Cavia porcellus</i>                          | 517       | 6973      | 214       | 83299   |
| <i>Chinchilla lanigera</i>                      | 0         | 200       | 0         | 59866   |
| <i>Octodon degus</i>                            | 0         | 198       | 0         | 54743   |
| <i>Dipodomys ordii</i>                          | 31        | 1654      | 22        | 34212   |
| <i>Jaculus jaculus</i>                          | 0         | 125       | 0         | 32728   |
| <i>Nannospalax galili</i>                       | 0         | 476       | 0         | 55208   |
| <i>Mesocricetus auratus</i>                     | 0         | 221       | 0         | 55280   |
| <i>Cricetulus griseus</i>                       | 14        | 358       | 18        | 66764   |
| <i>Microtus ochrogaster</i>                     | 0         | 158       | 0         | 30629   |
| <i>Peromyscus maniculatus bairdii</i>           | 0         | 240       | 0         | 45868   |
| <i>Rattus norvegicus</i>                        | 841       | 6208      | 529       | 87938   |
| <i>Mus musculus</i>                             | 3774      | 8200      | 629       | 86962   |
| <i>Tupaia belangeri</i>                         | 3         | 1623      | 3         | 65766   |
| <i>Tupaia chinensis</i>                         | 186       | 1189      | 72        | 72148   |
| <i>Galeopterus variegatus</i>                   | 0         | 1422      | 11        | 165452  |
| <i>Otolemur garnettii</i>                       | 0         | 496       | 0         | 100453  |

| Species                                | Both ORFs | ORF1 only | ORF2 only | No ORFs |
|----------------------------------------|-----------|-----------|-----------|---------|
| <i>Microcebus murinus</i>              | 18        | 1564      | 25        | 104391  |
| <i>Tarsius syrichta</i>                | 0         | 1620      | 4         | 166795  |
| <i>Callithrix jacchus</i>              | 13        | 3435      | 14        | 142404  |
| <i>Saimiri boliviensis boliviensis</i> | 0         | 508       | 0         | 126228  |
| <i>Rhinopithecus roxellana</i>         | 2549      | 2377      | 714       | 155523  |
| <i>Nasalis larvatus</i>                | 1         | 806       | 3         | 99602   |
| <i>Chlorocebus sabaeus</i>             | 12        | 808       | 1         | 113514  |
| <i>Macaca fascicularis</i>             | 29        | 3149      | 107       | 110908  |
| <i>Macaca mulatta</i>                  | 96        | 1494      | 68        | 106801  |
| <i>Papio anubis</i>                    | 35        | 3835      | 105       | 119816  |
| <i>Nomascus leucogenys</i>             | 76        | 3660      | 173       | 122321  |
| <i>Pongo abelii</i>                    | 48        | 4308      | 102       | 152923  |
| <i>Gorilla gorilla gorilla</i>         | 2         | 2763      | 15        | 124270  |
| <i>Pan paniscus</i>                    | 0         | 1593      | 7         | 148241  |
| <i>Pan troglodytes</i>                 | 60        | 2932      | 87        | 127819  |
| <i>Homo sapiens</i>                    | 266       | 2918      | 260       | 115223  |

#### SAUROPSIDA

|                                      |   |    |   |      |
|--------------------------------------|---|----|---|------|
| <i>Apalone spinifera</i>             | 0 | 4  | 0 | 2232 |
| <i>Pelodiscus sinensis</i>           | 0 | 5  | 0 | 1618 |
| <i>Chelonia mydas</i>                | 0 | 31 | 0 | 2788 |
| <i>Chrysemys picta bellii</i>        | 2 | 69 | 0 | 2272 |
| <i>Struthio camelus australis</i>    | 0 | 0  | 0 | 47   |
| <i>Tinamus guttatus</i>              | 0 | 0  | 0 | 19   |
| <i>Anas platyrhynchos</i>            | 0 | 0  | 0 | 29   |
| <i>Lyrurus tetrix tetrix</i>         | 0 | 0  | 0 | 13   |
| <i>Gallus gallus</i>                 | 0 | 0  | 0 | 15   |
| <i>Coturnix japonica</i>             | 0 | 0  | 0 | 3    |
| <i>Meleagris gallopavo</i>           | 0 | 0  | 0 | 7    |
| <i>Colinus virginianus</i>           | 0 | 6  | 0 | 115  |
| <i>Acanthisitta chloris</i>          | 0 | 0  | 0 | 33   |
| <i>Manacus vitellinus</i>            | 0 | 0  | 0 | 31   |
| <i>Zonotrichia albicollis</i>        | 0 | 0  | 0 | 30   |
| <i>Geospiza fortis</i>               | 0 | 0  | 0 | 20   |
| <i>Serinus canaria</i>               | 0 | 0  | 0 | 381  |
| <i>Taeniopygia guttata</i>           | 0 | 1  | 0 | 21   |
| <i>Ficedula albicollis</i>           | 0 | 1  | 0 | 27   |
| <i>Pseudopodoces humilis</i>         | 0 | 1  | 0 | 33   |
| <i>Corvus brachyrhynchos</i>         | 0 | 0  | 0 | 45   |
| <i>Corvus cornix cornix</i>          | 0 | 0  | 0 | 32   |
| <i>Ara macao</i>                     | 0 | 0  | 0 | 46   |
| <i>Amazona vittata</i>               | 0 | 0  | 0 | 58   |
| <i>Melopsittacus undulatus</i>       | 0 | 0  | 0 | 34   |
| <i>Nestor notabilis</i>              | 0 | 0  | 0 | 47   |
| <i>Falco cherrug</i>                 | 0 | 0  | 0 | 49   |
| <i>Falco peregrinus</i>              | 0 | 0  | 0 | 47   |
| <i>Cariama cristata</i>              | 0 | 0  | 0 | 54   |
| <i>Merops nubicus</i>                | 0 | 0  | 0 | 33   |
| <i>Picoides pubescens</i>            | 0 | 0  | 0 | 29   |
| <i>Buceros rhinoceros silvestris</i> | 0 | 0  | 0 | 35   |

| Species                                          | Both ORFs | ORF1 only | ORF2 only | No ORFs |
|--------------------------------------------------|-----------|-----------|-----------|---------|
| <i>Apaloderma vittatum</i>                       | 0         | 0         | 0         | 28      |
| <i>Leptosomus discolor</i>                       | 0         | 0         | 0         | 44      |
| <i>Haliaeetus albicilla</i>                      | 0         | 0         | 0         | 52      |
| <i>Haliaeetus leucocephalus</i>                  | 0         | 0         | 0         | 56      |
| <i>Aquila chrysaetos</i><br><i>Canadensis</i>    | 0         | 0         | 0         | 53      |
| <i>Cathartes aura</i>                            | 0         | 0         | 0         | 66      |
| <i>Tyto alba</i>                                 | 0         | 0         | 0         | 90      |
| <i>Colius striatus</i>                           | 0         | 0         | 0         | 33      |
| <i>Charadrius vociferus</i>                      | 0         | 0         | 0         | 51      |
| <i>Balearica regulorum</i><br><i>gibbericeps</i> | 0         | 0         | 0         | 51      |
| <i>Chlamydotis macqueenii</i>                    | 0         | 0         | 0         | 46      |
| <i>Cuculus canorus</i>                           | 0         | 0         | 0         | 33      |
| <i>Fulmarus glacialis</i>                        | 0         | 0         | 0         | 58      |
| <i>Aptenodytes forsteri</i>                      | 0         | 0         | 0         | 67      |
| <i>Pygoscelis adeliae</i>                        | 0         | 0         | 0         | 59      |
| <i>Phalacrocorax carbo</i>                       | 0         | 0         | 0         | 45      |
| <i>Pelecanus crispus</i>                         | 0         | 0         | 0         | 50      |
| <i>Nipponia nippon</i>                           | 0         | 0         | 0         | 57      |
| <i>Egretta garzetta</i>                          | 0         | 0         | 0         | 50      |
| <i>Phaethon lepturus</i>                         | 0         | 0         | 0         | 43      |
| <i>Gavia stellata</i>                            | 0         | 0         | 0         | 60      |
| <i>Tauraco erythrolophus</i>                     | 0         | 0         | 0         | 41      |
| <i>Opisthocomus hoazin</i>                       | 0         | 0         | 0         | 65      |
| <i>Columba livia</i>                             | 0         | 0         | 0         | 46      |
| <i>Pterocles gutturalis</i>                      | 0         | 0         | 0         | 50      |
| <i>Calypte anna</i>                              | 0         | 0         | 0         | 24      |
| <i>Chaetura pelagica</i>                         | 0         | 0         | 0         | 24      |
| <i>Caprimulgus carolinensis</i>                  | 0         | 0         | 0         | 62      |
| <i>Eurypyga helias</i>                           | 0         | 0         | 0         | 33      |
| <i>Mesitornis unicolor</i>                       | 0         | 0         | 0         | 34      |
| <i>Podiceps cristatus</i>                        | 0         | 0         | 0         | 43      |
| <i>Phoenicopterus ruber</i><br><i>ruber</i>      | 0         | 0         | 0         | 62      |
| <i>Alligator mississippiensis</i>                | 0         | 37        | 0         | 2877    |
| <i>Alligator sinensis</i>                        | 0         | 35        | 0         | 3072    |
| <i>Crocodylus porosus</i>                        | 0         | 23        | 0         | 2637    |
| <i>Gavialis gangeticus</i>                       | 0         | 22        | 0         | 2819    |
| <i>Pogona vitticeps</i>                          | 0         | 24        | 0         | 3568    |
| <i>Anolis carolinensis</i>                       | 138       | 385       | 74        | 1461    |
| <i>Vipera berus berus</i>                        | 0         | 99        | 2         | 4070    |
| <i>Crotalus mitchellii</i><br><i>pyrrhus</i>     | 0         | 6         | 0         | 3136    |
| <i>Ophiophagus hannah</i>                        | 0         | 40        | 0         | 7737    |
| <i>Python bivittatus</i>                         | 0         | 5         | 0         | 2485    |
| <b>AMPHIBIA</b>                                  |           |           |           |         |
| <i>Nanorana parkeri</i>                          | 2         | 65        | 12        | 1807    |
| <i>Xenopus tropicalis</i>                        | 102       | 175       | 102       | 926     |
| <b>NEOPTERYGII</b>                               |           |           |           |         |
| <i>Lepisosteus oculatus</i>                      | 0         | 1         | 2         | 173     |

| Species                         | Both ORFs | ORF1 only | ORF2 only | No ORFs |
|---------------------------------|-----------|-----------|-----------|---------|
| <i>Anguilla anguilla</i>        | 2         | 2         | 1         | 744     |
| <i>Anguilla japonica</i>        | 0         | 13        | 4         | 847     |
| <i>Danio rerio</i>              | 182       | 173       | 104       | 1107    |
| <i>Astyanax mexicanus</i>       | 0         | 11        | 0         | 350     |
| <i>Oryzias latipes</i>          | 1         | 27        | 2         | 1692    |
| <i>Poecilia formosa</i>         | 4         | 34        | 1         | 437     |
| <i>Xiphophorus maculatus</i>    | 1         | 12        | 2         | 487     |
| <i>Fundulus heteroclitus</i>    | 4         | 29        | 3         | 1032    |
| <i>Takifugu flavidus</i>        | 0         | 8         | 0         | 322     |
| <i>Takifugu rubripes</i>        | 0         | 10        | 0         | 253     |
| <i>Tetraodon nigroviridis</i>   | 0         | 8         | 0         | 50      |
| <i>Cynoglossus semilaevis</i>   | 0         | 0         | 0         | 81      |
| <i>Haplochromis burtoni</i>     | 0         | 16        | 3         | 764     |
| <i>Pundamilia nyererei</i>      | 0         | 25        | 1         | 776     |
| <i>Maylandia zebra</i>          | 0         | 31        | 3         | 863     |
| <i>Neolamprologus brichardi</i> | 0         | 23        | 0         | 766     |
| <i>Oreochromis niloticus</i>    | 4         | 57        | 3         | 1159    |
| <i>Sebastes nigrocinctus</i>    | 0         | 5         | 0         | 462     |
| <i>Sebastes rubrivinctus</i>    | 0         | 8         | 0         | 451     |
| <i>Gasterosteus aculeatus</i>   | 0         | 22        | 8         | 149     |
| <i>Gadus morhua</i>             | 1         | 20        | 1         | 891     |

#### CHONDRICHTHYES

|                                |   |   |   |      |
|--------------------------------|---|---|---|------|
| <i>Callorhynchus milii</i>     | 0 | 0 | 0 | 113  |
| <i>Carcharhinus brachyurus</i> | 0 | 0 | 0 | 2426 |

#### ECDYSOZOA

|                                  |     |     |    |     |
|----------------------------------|-----|-----|----|-----|
| <i>Aedes aegypti</i>             | 142 | 356 | 45 | 505 |
| <i>Culex quinquefasciatus</i>    | 54  | 147 | 9  | 177 |
| <i>Anopheles albimanus</i>       | 0   | 5   | 0  | 34  |
| <i>Anopheles arabiensis</i>      | 0   | 5   | 0  | 55  |
| <i>Anopheles atroparvus</i>      | 0   | 8   | 0  | 56  |
| <i>Anopheles christyi</i>        | 0   | 3   | 0  | 41  |
| <i>Anopheles culicifacies</i>    | 0   | 5   | 0  | 35  |
| <i>Anopheles darlingi</i>        | 0   | 2   | 1  | 30  |
| <i>Anopheles dirus</i>           | 0   | 9   | 0  | 71  |
| <i>Anopheles epiroticus</i>      | 0   | 8   | 0  | 43  |
| <i>Anopheles farauti</i>         | 0   | 6   | 0  | 52  |
| <i>Anopheles funestus</i>        | 2   | 5   | 0  | 34  |
| <i>Anopheles gambiae</i>         | 3   | 9   | 3  | 52  |
| <i>Anopheles maculatus</i>       | 0   | 2   | 0  | 31  |
| <i>Anopheles melas</i>           | 0   | 3   | 0  | 40  |
| <i>Anopheles merus</i>           | 0   | 5   | 0  | 89  |
| <i>Anopheles minimus</i>         | 0   | 3   | 0  | 35  |
| <i>Anopheles quadriannulatus</i> | 0   | 3   | 0  | 59  |
| <i>Anopheles sinensis</i>        | 0   | 5   | 1  | 33  |
| <i>Anopheles stephensi</i>       | 0   | 5   | 0  | 46  |
| <i>Ceratitis capitata</i>        | 0   | 5   | 0  | 97  |
| <i>Drosophila albomicans</i>     | 0   | 1   | 0  | 49  |
| <i>Drosophila ananassae</i>      | 0   | 5   | 0  | 18  |
| <i>Drosophila biarmipes</i>      | 0   | 1   | 0  | 24  |

| Species                                                 | Both ORFs | ORF1 only | ORF2 only | No ORFs |
|---------------------------------------------------------|-----------|-----------|-----------|---------|
| <i>Drosophila bipectinata</i>                           | 0         | 3         | 0         | 15      |
| <i>Drosophila elegans</i>                               | 0         | 7         | 0         | 25      |
| <i>Drosophila erecta</i>                                | 0         | 5         | 0         | 19      |
| <i>Drosophila eugracilis</i>                            | 0         | 5         | 0         | 20      |
| <i>Drosophila ficusphila</i>                            | 0         | 4         | 2         | 58      |
| <i>Drosophila grimshawi</i>                             | 0         | 6         | 0         | 64      |
| <i>Drosophila kikkawai</i>                              | 0         | 5         | 0         | 28      |
| <i>Drosophila melanogaster</i>                          | 0         | 2         | 0         | 14      |
| <i>Drosophila miranda</i>                               | 0         | 7         | 0         | 22      |
| <i>Drosophila mojavensis</i>                            | 0         | 2         | 0         | 111     |
| <i>Drosophila persimilis</i>                            | 0         | 5         | 0         | 31      |
| <i>Drosophila pseudoobscura</i><br><i>pseudoobscura</i> | 0         | 6         | 0         | 28      |
| <i>Drosophila rhopaloa</i>                              | 0         | 4         | 0         | 14      |
| <i>Drosophila sechellia</i>                             | 0         | 3         | 0         | 14      |
| <i>Drosophila simulans</i>                              | 0         | 2         | 0         | 17      |
| <i>Drosophila suzukii</i>                               | 0         | 6         | 0         | 31      |
| <i>Drosophila takahashii</i>                            | 0         | 2         | 0         | 23      |
| <i>Drosophila virilis</i>                               | 0         | 12        | 0         | 55      |
| <i>Drosophila willistoni</i>                            | 0         | 4         | 0         | 37      |
| <i>Drosophila yakuba</i>                                | 0         | 3         | 0         | 19      |
| <i>Musca domestica</i>                                  | 0         | 8         | 0         | 75      |
| <i>Glossina austeni</i>                                 | 0         | 6         | 0         | 137     |
| <i>Glossina brevipalpis</i>                             | 0         | 2         | 0         | 178     |
| <i>Glossina fuscipes fuscipes</i>                       | 0         | 6         | 0         | 129     |
| <i>Glossina morsitans</i><br><i>morsitans</i>           | 0         | 4         | 0         | 120     |
| <i>Glossina pallidipes</i>                              | 0         | 6         | 0         | 116     |
| <i>Orussus abietinus</i>                                | 0         | 2         | 0         | 18      |
| <i>Microplitis demolitor</i>                            | 0         | 4         | 0         | 65      |
| <i>Blattella germanica</i>                              | 0         | 6         | 4         | 945     |
| <i>Zootermopsis nevadensis</i>                          | 0         | 1         | 0         | 28      |
| <i>Daphnia pulex</i>                                    | 0         | 1         | 0         | 26      |
| <i>Eurytemora affinis</i>                               | 0         | 2         | 0         | 275     |
| <i>Hyalella azteca</i>                                  | 0         | 1         | 0         | 136     |
| <i>Latrodectus hesperus</i>                             | 0         | 2         | 0         | 76      |
| <i>Ixodes ricinus</i>                                   | 2         | 5         | 2         | 437     |
| <i>Ixodes scapularis</i>                                | 0         | 5         | 0         | 1101    |
| <i>Rhipicephalus microplus</i>                          | 0         | 2         | 0         | 86      |
| <i>Metaseiulus occidentalis</i>                         | 0         | 3         | 0         | 31      |
| <i>Centruroides exilicauda</i>                          | 0         | 0         | 1         | 64      |
| <i>Limulus polyphemus</i>                               | 0         | 0         | 0         | 145     |
| <i>Trichinella spiralis</i>                             | 0         | 1         | 0         | 13      |
| <b>ROTIFERA</b>                                         |           |           |           |         |
| <i>Adineta vaga</i>                                     | 0         | 2         | 0         | 21      |
| <b>PLATYHELMINTHES</b>                                  |           |           |           |         |
| <i>Schistosoma curassoni</i>                            | 0         | 0         | 0         | 170     |
| <i>Schistosoma haematobium</i>                          | 0         | 0         | 0         | 151     |
| <i>Schistosoma japonicum</i>                            | 0         | 1         | 0         | 82      |
| <i>Schistosoma mansoni</i>                              | 0         | 1         | 0         | 95      |
| <i>Schistosoma margrebowiei</i>                         | 0         | 0         | 0         | 136     |

| Species                                  | Both ORFs | ORF1 only | ORF2 only | No ORFs |
|------------------------------------------|-----------|-----------|-----------|---------|
| <i>Schistosoma mattheei</i>              | 0         | 3         | 0         | 117     |
| <i>Schistosoma rodhaini</i>              | 0         | 1         | 0         | 93      |
| <i>Clonorchis sinensis</i>               | 0         | 0         | 0         | 213     |
| <b>ANNELIDA</b>                          |           |           |           |         |
| <i>Capitella teleta</i>                  | 0         | 0         | 0         | 10      |
| <i>Helobdella robusta</i>                | 0         | 5         | 0         | 355     |
| <b>MOLLUSCA</b>                          |           |           |           |         |
| <i>Crassostrea gigas</i>                 | 12        | 7         | 21        | 331     |
| <i>Lottia gigantea</i>                   | 0         | 12        | 0         | 69      |
| <i>Aplysia californica</i>               | 0         | 14        | 1         | 1594    |
| <i>Biomphalaria glabrata</i>             | 0         | 9         | 0         | 523     |
| <b>CNIDARIA</b>                          |           |           |           |         |
| <i>Nematostella vectensis</i>            | 1         | 4         | 0         | 30      |
| <i>Hydra vulgaris</i>                    | 1         | 6         | 2         | 308     |
| <b>VIRIDIPLANTAE</b>                     |           |           |           |         |
| <i>Chlamydomonas reinhardtii</i>         | 1         | 1         | 3         | 67      |
| <i>Volvox carteri f. nagariensis</i>     | 1         | 4         | 5         | 99      |
| <i>Chlorella variabilis</i>              | 0         | 0         | 0         | 9       |
| <i>Coccomyxa subellipsoidea C-169</i>    | 13        | 0         | 2         | 45      |
| <i>Physcomitrella patens</i>             | 0         | 0         | 0         | 47      |
| <i>Selaginella moellendorffii</i>        | 7         | 10        | 3         | 35      |
| <i>Pinus taeda</i>                       | 3         | 48        | 2         | 1030    |
| <i>Amborella trichopoda</i>              | 0         | 21        | 0         | 2198    |
| <i>Spirodela polyrhiza</i>               | 0         | 2         | 0         | 46      |
| <i>Phoenix dactylifera</i>               | 1         | 9         | 23        | 2624    |
| <i>Elaeis oleifera</i>                   | 0         | 0         | 0         | 1125    |
| <i>Ensete ventricosum</i>                | 0         | 0         | 0         | 8       |
| <i>Musa acuminata subsp. malaccensis</i> | 0         | 4         | 0         | 208     |
| <i>Sorghum bicolor</i>                   | 29        | 101       | 68        | 991     |
| <i>Zea mays</i>                          | 64        | 147       | 140       | 1540    |
| <i>Setaria italica</i>                   | 14        | 24        | 31        | 868     |
| <i>Brachypodium distachyon</i>           | 1         | 32        | 4         | 737     |
| <i>Leersia perrieri</i>                  | 1         | 19        | 2         | 545     |
| <i>Oryza barthii</i>                     | 3         | 29        | 5         | 668     |
| <i>Oryza brachyantha</i>                 | 1         | 3         | 1         | 175     |
| <i>Oryza glumipatula</i>                 | 0         | 33        | 4         | 636     |
| <i>Oryza longistaminata</i>              | 12        | 25        | 23        | 869     |
| <i>Oryza meridionalis</i>                | 0         | 29        | 2         | 571     |
| <i>Oryza nivara</i>                      | 0         | 30        | 6         | 711     |
| <i>Oryza punctata</i>                    | 0         | 23        | 1         | 580     |
| <i>Oryza sativa Japonica Group</i>       | 8         | 40        | 7         | 768     |
| <i>Zizania latifolia</i>                 | 0         | 3         | 2         | 711     |
| <i>Aegilops tauschii</i>                 | 10        | 362       | 82        | 7989    |
| <i>Triticum urartu</i>                   | 20        | 411       | 120       | 8066    |
| <i>Nelumbo nucifera</i>                  | 0         | 50        | 1         | 4650    |

| Species                                                 | Both ORFs | ORF1 only | ORF2 only | No ORFs |
|---------------------------------------------------------|-----------|-----------|-----------|---------|
| <i>Lupinus angustifolius</i>                            | 0         | 42        | 3         | 1059    |
| <i>Phaseolus vulgaris</i>                               | 0         | 18        | 27        | 1540    |
| <i>Cajanus cajan</i>                                    | 0         | 40        | 1         | 588     |
| <i>Vigna angularis</i> var.<br><i>angularis</i>         | 0         | 0         | 0         | 133     |
| <i>Vigna radiata</i> var. <i>radiata</i>                | 0         | 0         | 0         | 207     |
| <i>Glycine max</i>                                      | 40        | 152       | 52        | 1511    |
| <i>Glycine soja</i>                                     | 37        | 179       | 40        | 1890    |
| <i>Cicer arietinum</i>                                  | 0         | 0         | 0         | 459     |
| <i>Medicago truncatula</i>                              | 16        | 20        | 10        | 309     |
| <i>Trifolium pratense</i>                               | 7         | 48        | 11        | 1430    |
| <i>Lotus japonicus</i>                                  | 0         | 12        | 0         | 807     |
| <i>Malus x domestica</i>                                | 10        | 25        | 10        | 475     |
| <i>Pyrus x bretschneideri</i>                           | 5         | 27        | 8         | 636     |
| <i>Prunus mume</i>                                      | 2         | 17        | 3         | 339     |
| <i>Prunus persica</i>                                   | 5         | 18        | 3         | 254     |
| <i>Fragaria iinumae</i>                                 | 0         | 6         | 0         | 500     |
| <i>Fragaria nubicola</i>                                | 0         | 11        | 0         | 733     |
| <i>Fragaria orientalis</i>                              | 0         | 3         | 0         | 1043    |
| <i>Fragaria vesca</i> subsp.<br><i>vesca</i>            | 1         | 19        | 2         | 452     |
| <i>Fragaria x ananassa</i>                              | 2         | 4         | 1         | 574     |
| <i>Morus notabilis</i>                                  | 0         | 2         | 0         | 677     |
| <i>Cannabis sativa</i>                                  | 12        | 130       | 33        | 1775    |
| <i>Castanea mollissima</i>                              | 0         | 44        | 10        | 2537    |
| <i>Betula nana</i>                                      | 0         | 4         | 11        | 2070    |
| <i>Cucumis melo</i>                                     | 0         | 4         | 2         | 649     |
| <i>Cucumis sativus</i>                                  | 0         | 1         | 3         | 511     |
| <i>Citrullus lanatus</i>                                | 0         | 1         | 0         | 588     |
| <i>Lagenaria siceraria</i>                              | 0         | 0         | 0         | 521     |
| <i>Populus euphratica</i>                               | 51        | 60        | 21        | 316     |
| <i>Populus trichocarpa</i>                              | 9         | 53        | 18        | 448     |
| <i>Jatropha curcas</i>                                  | 1         | 21        | 10        | 390     |
| <i>Manihot esculenta</i> subsp.<br><i>flabellifolia</i> | 1         | 10        | 1         | 618     |
| <i>Ricinus communis</i>                                 | 0         | 3         | 0         | 141     |
| <i>Linum usitatissimum</i>                              | 0         | 0         | 1         | 426     |
| <i>Eucalyptus camaldulensis</i>                         | 5         | 114       | 16        | 3464    |
| <i>Eucalyptus grandis</i>                               | 27        | 217       | 39        | 2307    |
| <i>Carica papaya</i>                                    | 0         | 3         | 0         | 907     |
| <i>Arabidopsis halleri</i> subsp.<br><i>gemmifera</i>   | 37        | 107       | 23        | 2322    |
| <i>Arabidopsis lyrata</i> subsp.<br><i>lyrata</i>       | 43        | 82        | 91        | 611     |
| <i>Arabidopsis thaliana</i>                             | 9         | 40        | 13        | 198     |
| <i>Camelina sativa</i>                                  | 37        | 347       | 94        | 2857    |
| <i>Capsella rubella</i>                                 | 29        | 39        | 29        | 175     |
| <i>Brassica napus</i>                                   | 188       | 362       | 544       | 2833    |
| <i>Brassica oleracea</i> var.<br><i>oleracea</i>        | 33        | 180       | 97        | 2731    |
| <i>Brassica rapa</i>                                    | 90        | 100       | 213       | 1450    |



| Species                                                    | Both ORFs | ORF1 only | ORF2 only | No ORFs |
|------------------------------------------------------------|-----------|-----------|-----------|---------|
| <i>Raphanus raphanistrum</i><br><i>subsp. raphanistrum</i> | 93        | 133       | 126       | 1067    |
| <i>Raphanus sativus</i>                                    | 125       | 190       | 233       | 1047    |
| <i>Aethionema arabicum</i>                                 | 21        | 89        | 32        | 921     |
| <i>Arabis alpina</i>                                       | 18        | 154       | 51        | 1305    |
| <i>Eutrema parvulum</i>                                    | 0         | 20        | 2         | 278     |
| <i>Eutrema salsugineum</i>                                 | 19        | 133       | 35        | 676     |
| <i>Sisymbrium irio</i>                                     | 10        | 74        | 10        | 897     |
| <i>Leavenworthia alabamica</i>                             | 8         | 27        | 16        | 255     |
| <i>Tarenaya hassleriana</i>                                | 4         | 21        | 8         | 206     |
| <i>Gossypium arboreum</i>                                  | 0         | 45        | 1         | 2785    |
| <i>Gossypium raimondii</i>                                 | 1         | 52        | 1         | 1517    |
| <i>Theobroma cacao</i>                                     | 3         | 8         | 14        | 549     |
| <i>Aquilaria agallochum</i>                                | 0         | 6         | 2         | 627     |
| <i>Azadirachta indica</i>                                  | 0         | 1         | 0         | 205     |
| <i>Citrus clementine</i>                                   | 7         | 76        | 13        | 671     |
| <i>Citrus sinensis</i>                                     | 4         | 80        | 13        | 783     |
| <i>Vitis vinifera</i>                                      | 39        | 165       | 80        | 2221    |
| <i>Amaranthus</i><br><i>hypochondriacus</i>                | 0         | 46        | 0         | 1855    |
| <i>Amaranthus tuberculatus</i>                             | 0         | 0         | 0         | 102     |
| <i>Beta vulgaris subsp.</i><br><i>vulgaris</i>             | 69        | 172       | 181       | 1880    |
| <i>Spinacia oleracea</i>                                   | 19        | 129       | 31        | 1444    |
| <i>Dianthus caryophyllus</i>                               | 33        | 92        | 94        | 1023    |
| <i>Actinidia chinensis</i>                                 | 5         | 32        | 3         | 799     |
| <i>Vaccinium macrocarpon</i>                               | 0         | 4         | 2         | 1029    |
| <i>Diospyros lotus</i>                                     | 0         | 0         | 0         | 1       |
| <i>Primula veris</i>                                       | 0         | 5         | 3         | 223     |
| <i>Solanum arcanum</i>                                     | 28        | 68        | 5         | 2218    |
| <i>Solanum habrochaites</i>                                | 10        | 62        | 3         | 2560    |
| <i>Solanum lycopersicum</i>                                | 10        | 63        | 8         | 1945    |
| <i>Solanum melongena</i>                                   | 0         | 18        | 0         | 2609    |
| <i>Solanum pennellii</i>                                   | 1         | 58        | 2         | 2322    |
| <i>Solanum pimpinellifolium</i>                            | 9         | 37        | 2         | 3827    |
| <i>Solanum tuberosum</i>                                   | 8         | 153       | 16        | 2892    |
| <i>Capsicum annum</i>                                      | 0         | 36        | 1         | 7870    |
| <i>Nicotiana sylvestris</i>                                | 1         | 187       | 6         | 5693    |
| <i>Nicotiana</i><br><i>tomentosiformis</i>                 | 0         | 115       | 1         | 4406    |
| <i>Fraxinus excelsior</i>                                  | 3         | 25        | 14        | 1215    |
| <i>Penstemon</i><br><i>centranthifolius</i>                | 0         | 0         | 0         | 14      |
| <i>Penstemon grinnellii</i>                                | 0         | 0         | 0         | 14      |
| <i>Sesamum indicum</i>                                     | 0         | 58        | 8         | 1124    |
| <i>Genlisea aurea</i>                                      | 0         | 1         | 0         | 26      |
| <i>Mimulus guttatus</i>                                    | 10        | 32        | 47        | 325     |
| <i>Conyza canadensis</i>                                   | 0         | 4         | 5         | 307     |
| <b>ECHINOIDEA</b>                                          |           |           |           |         |
| <i>Lytechinus variegatus</i>                               | 0         | 6         | 0         | 1538    |

| Species                              | Both ORFs | ORF1 only | ORF2 only | No ORFs |
|--------------------------------------|-----------|-----------|-----------|---------|
| <i>Strongylocentrotus purpuratus</i> | 3         | 16        | 16        | 2676    |
| <b>ASTEROIDEA</b>                    |           |           |           |         |
| <i>Patiria miniata</i>               | 0         | 0         | 2         | 66      |
| <b>ENTEROPNEUSTA</b>                 |           |           |           |         |
| <i>Saccoglossus kowalevskii</i>      | 2         | 42        | 4         | 581     |
| <b>TUNICATA</b>                      |           |           |           |         |
| <i>Ciona intestinalis</i>            | 0         | 0         | 0         | 9       |
| <i>Ciona savignyi</i>                | 30        | 179       | 13        | 449     |
| <i>Botryllus schlosseri</i>          | 0         | 0         | 0         | 14      |
| <b>LEPTOCARDII</b>                   |           |           |           |         |
| <i>Branchiostoma floridae</i>        | 6         | 7         | 10        | 151     |
| <b>CEPHALASPIDOMORPHI</b>            |           |           |           |         |
| <i>Lethenteron camtschaticum</i>     | 2         | 13        | 2         | 245     |
| <i>Petromyzon marinus</i>            | 1         | 15        | 0         | 121     |
| <b>SARCOPTERYGII</b>                 |           |           |           |         |
| <i>Latimeria chalumnae</i>           | 2         | 265       | 15        | 3439    |

### 3.2.2 Table 7: L1 status of each species

Table 7: **L1 status of each species:** The union of LASTZ and TBLASTN results was used to determine the most likely status of each species: L1- (no L1s found), L1+ (L1s present), or L1\* (L1s present and potentially active, based on the presence of intact ORF2 satisfying our criteria). This was done to control for differences in genome assembly quality and quantity of available nucleotide data.

| No              | Species                                 | LASTZ                            |                | TBLASTN                          |                | L1 status<br>(L1-, L1+<br>or L1*) |
|-----------------|-----------------------------------------|----------------------------------|----------------|----------------------------------|----------------|-----------------------------------|
|                 |                                         | Verified<br>L1s in the<br>genome | Intact<br>ORF2 | Verified<br>L1s for the<br>taxon | Intact<br>ORF2 |                                   |
| <b>MAMMALIA</b> |                                         |                                  |                |                                  |                |                                   |
| 1               | <i>Tachyglossus aculeatus</i>           | N                                | N              | N                                | N              | L1-                               |
| 2               | <i>Ornithorhynchus anatinus</i>         | N                                | N              | N                                | N              | L1-                               |
| 3               | <i>Monodelphis domestica</i>            | Y                                | Y              | Y                                | Y              | L1*                               |
| 4               | <i>Macropus eugenii</i>                 | Y                                | N              | Y                                | Y              | L1*                               |
| 5               | <i>Sarcophilus harrisii</i>             | Y                                | N              | Y                                | N              | L1+                               |
| 6               | <i>Dasypus novemcinctus</i>             | Y                                | Y              | Y                                | Y              | L1*                               |
| 7               | <i>Choloepus hoffmanni</i>              | Y                                | Y              | Y                                | Y              | L1*                               |
| 8               | <i>Chrysochloris asiatica</i>           | Y                                | N              | Y                                | N              | L1+                               |
| 9               | <i>Echinops telfairi</i>                | Y                                | N              | Y                                | Y              | L1*                               |
| 10              | <i>Orycteropus afer afer</i>            | Y                                | N              | Y                                | N              | L1+                               |
| 11              | <i>Elephantulus edwardii</i>            | Y                                | N              | Y                                | N              | L1+                               |
| 12              | <i>Trichechus manatus latirostris</i>   | Y                                | N              | Y                                | N              | L1+                               |
| 13              | <i>Procavia capensis</i>                | Y                                | Y              | Y                                | Y              | L1*                               |
| 14              | <i>Loxodonta africana</i>               | Y                                | Y              | Y                                | Y              | L1*                               |
| 15              | <i>Erinaceus europaeus</i>              | Y                                | N              | Y                                | N              | L1+                               |
| 16              | <i>Sorex araneus</i>                    | Y                                | N              | Y                                | Y              | L1*                               |
| 17              | <i>Condylura cristata</i>               | Y                                | N              | Y                                | N              | L1+                               |
| 18              | <i>Pteropus alecto</i>                  | Y                                | N              | Y                                | N              | L1+                               |
| 19              | <i>Pteropus vampyrus</i>                | Y                                | N              | Y                                | N              | L1+                               |
| 20              | <i>Eidolon helvum</i>                   | Y                                | N              | Y                                | N              | L1+                               |
| 21              | <i>Megaderma lyra</i>                   | Y                                | N              | N                                | N              | L1+                               |
| 22              | <i>Rhinolophus ferrumequinum</i>        | Y                                | N              | Y                                | Y              | L1*                               |
| 23              | <i>Pteronotus parnellii</i>             | Y                                | N              | N                                | N              | L1+                               |
| 24              | <i>Eptesicus fuscus</i>                 | Y                                | N              | Y                                | N              | L1+                               |
| 25              | <i>Myotis brandtii</i>                  | Y                                | Y              | Y                                | N              | L1*                               |
| 26              | <i>Myotis davidii</i>                   | Y                                | N              | Y                                | N              | L1+                               |
| 27              | <i>Myotis lucifugus</i>                 | Y                                | Y              | Y                                | Y              | L1*                               |
| 28              | <i>Ceratotherium simum simum</i>        | Y                                | N              | Y                                | N              | L1+                               |
| 29              | <i>Equus przewalskii</i>                | Y                                | Y              | Y                                | N              | L1*                               |
| 30              | <i>Equus caballus</i><br>(Thoroughbred) | Y                                | Y              | Y                                | Y              | L1*                               |
| 31              | <i>Equus caballus</i><br>(Mongolian)    | Y                                | N              | Y                                | Y              | L1*                               |
| 32              | <i>Manis pentadactyla</i>               | Y                                | Y              | N                                | N              | L1*                               |
| 33              | <i>Felis catus</i>                      | Y                                | Y              | Y                                | Y              | L1*                               |
| 34              | <i>Panthera tigris altaica</i>          | Y                                | Y              | Y                                | N              | L1*                               |

| No | Species                                            | LASTZ                            |                | TBLASTN                          |                | L1 status<br>(L1-, L1+<br>or L1*) |
|----|----------------------------------------------------|----------------------------------|----------------|----------------------------------|----------------|-----------------------------------|
|    |                                                    | Verified<br>L1s in the<br>genome | Intact<br>ORF2 | Verified<br>L1s for the<br>taxon | Intact<br>ORF2 |                                   |
| 35 | <i>Canis lupus familiaris</i>                      | Y                                | Y              | Y                                | Y              | L1*                               |
| 36 | <i>Ursus maritimus</i>                             | Y                                | Y              | Y                                | N              | L1*                               |
| 37 | <i>Ailuropoda melanoleuca</i>                      | Y                                | Y              | Y                                | N              | L1*                               |
| 38 | <i>Leptonychotes weddellii</i>                     | Y                                | N              | Y                                | N              | L1+                               |
| 39 | <i>Odobenus rosmarus<br/>divergens</i>             | Y                                | Y              | Y                                | N              | L1*                               |
| 40 | <i>Mustela putorius furo</i>                       | Y                                | N              | Y                                | Y              | L1*                               |
| 41 | <i>Camelus dromedarius</i>                         | Y                                | Y              | Y                                | N              | L1*                               |
| 42 | <i>Camelus ferus</i>                               | Y                                | Y              | Y                                | N              | L1*                               |
| 43 | <i>Vicugna pacos</i>                               | Y                                | N              | Y                                | Y              | L1*                               |
| 44 | <i>Sus scrofa</i> (Duroc)                          | Y                                | Y              | Y                                | Y              | L1*                               |
| 45 | <i>Sus scrofa</i> (Tibetan)                        | Y                                | Y              | Y                                | Y              | L1*                               |
| 46 | <i>Sus scrofa</i> (Ellegaard<br>Gottingen minipig) | Y                                | Y              | Y                                | Y              | L1*                               |
| 47 | <i>Balaenoptera<br/>acutorostrata scammoni</i>     | Y                                | Y              | Y                                | N              | L1*                               |
| 48 | <i>Physeter catodon</i>                            | Y                                | N              | Y                                | N              | L1+                               |
| 49 | <i>Lipotes vexillifer</i>                          | Y                                | Y              | Y                                | N              | L1*                               |
| 50 | <i>Tursiops truncatus</i>                          | Y                                | N              | Y                                | N              | L1+                               |
| 51 | <i>Orcinus orca</i>                                | Y                                | Y              | Y                                | N              | L1*                               |
| 52 | <i>Panholops hodgsonii</i>                         | Y                                | Y              | Y                                | N              | L1*                               |
| 53 | <i>Capra hircus</i>                                | Y                                | N              | Y                                | N              | L1+                               |
| 54 | <i>Ovis aries</i>                                  | Y                                | Y              | Y                                | N              | L1*                               |
| 55 | <i>Ovis aries musimon</i>                          | Y                                | N              | Y                                | N              | L1+                               |
| 56 | <i>Bubalus bubalis</i>                             | Y                                | N              | Y                                | N              | L1+                               |
| 57 | <i>Bison bison bison</i>                           | Y                                | Y              | Y                                | N              | L1*                               |
| 58 | <i>Bos mutus</i>                                   | Y                                | Y              | Y                                | N              | L1*                               |
| 59 | <i>Bos indicus</i>                                 | Y                                | Y              | Y                                | N              | L1*                               |
| 60 | <i>Bos taurus</i>                                  | Y                                | Y              | Y                                | Y              | L1*                               |
| 61 | <i>Ochotona princeps</i>                           | Y                                | N              | Y                                | Y              | L1*                               |
| 62 | <i>Oryctolagus cuniculus</i>                       | Y                                | Y              | Y                                | Y              | L1*                               |
| 63 | <i>Ictidomys<br/>tridecemlineatus</i>              | Y                                | N              | Y                                | Y              | L1*                               |
| 64 | <i>Heterocephalus glaber</i>                       | Y                                | N              | Y                                | N              | L1+                               |
| 65 | <i>Fukomys damarensis</i>                          | Y                                | Y              | Y                                | N              | L1*                               |
| 66 | <i>Cavia aperea</i>                                | Y                                | Y              | N                                | N              | L1*                               |
| 67 | <i>Cavia porcellus</i>                             | Y                                | Y              | Y                                | Y              | L1*                               |
| 68 | <i>Chinchilla lanigera</i>                         | Y                                | N              | Y                                | N              | L1+                               |
| 69 | <i>Octodon degus</i>                               | Y                                | N              | Y                                | N              | L1+                               |
| 70 | <i>Dipodomys ordii</i>                             | Y                                | Y              | Y                                | N              | L1*                               |
| 71 | <i>Jaculus jaculus</i>                             | Y                                | N              | Y                                | N              | L1+                               |
| 72 | <i>Nannospalax galili</i>                          | Y                                | N              | Y                                | N              | L1+                               |
| 73 | <i>Mesocricetus auratus</i>                        | Y                                | N              | Y                                | N              | L1+                               |
| 74 | <i>Cricetulus griseus</i>                          | Y                                | Y              | Y                                | N              | L1*                               |
| 75 | <i>Microtus ochrogaster</i>                        | Y                                | N              | Y                                | N              | L1+                               |
| 76 | <i>Peromyscus maniculatus<br/>bairdii</i>          | Y                                | N              | Y                                | N              | L1+                               |
| 77 | <i>Rattus norvegicus</i>                           | Y                                | Y              | Y                                | Y              | L1*                               |

| No                | Species                                    | LASTZ                            |                | TBLASTN                          |                | L1 status<br>(L1-, L1+<br>or L1*) |
|-------------------|--------------------------------------------|----------------------------------|----------------|----------------------------------|----------------|-----------------------------------|
|                   |                                            | Verified<br>L1s in the<br>genome | Intact<br>ORF2 | Verified<br>L1s for the<br>taxon | Intact<br>ORF2 |                                   |
| 78                | <i>Mus musculus</i>                        | Y                                | Y              | Y                                | Y              | L1*                               |
| 79                | <i>Tupaia belangeri</i>                    | Y                                | Y              | Y                                | Y              | L1*                               |
| 80                | <i>Tupaia chinensis</i>                    | Y                                | Y              | Y                                | N              | L1*                               |
| 81                | <i>Galeopterus variegatus</i>              | Y                                | Y              | Y                                | N              | L1*                               |
| 82                | <i>Otolemur garnettii</i>                  | Y                                | N              | Y                                | Y              | L1*                               |
| 83                | <i>Microcebus murinus</i>                  | Y                                | Y              | Y                                | Y              | L1*                               |
| 84                | <i>Tarsius syrichta</i>                    | Y                                | Y              | Y                                | N              | L1*                               |
| 85                | <i>Callithrix jacchus</i>                  | Y                                | Y              | Y                                | Y              | L1*                               |
| 86                | <i>Saimiri boliviensis<br/>boliviensis</i> | Y                                | N              | Y                                | Y              | L1*                               |
| 87                | <i>Rhinopithecus roxellana</i>             | Y                                | Y              | Y                                | N              | L1*                               |
| 88                | <i>Nasalis larvatus</i>                    | Y                                | Y              | Y                                | N              | L1*                               |
| 89                | <i>Chlorocebus sabaenus</i>                | Y                                | Y              | Y                                | N              | L1*                               |
| 90                | <i>Macaca fascicularis</i>                 | Y                                | Y              | Y                                | Y              | L1*                               |
| 91                | <i>Macaca mulatta</i>                      | Y                                | Y              | Y                                | Y              | L1*                               |
| 92                | <i>Papio anubis</i>                        | Y                                | Y              | Y                                | Y              | L1*                               |
| 93                | <i>Nomascus leucogenys</i>                 | Y                                | Y              | Y                                | Y              | L1*                               |
| 94                | <i>Pongo abelii</i>                        | Y                                | Y              | Y                                | Y              | L1*                               |
| 95                | <i>Gorilla gorilla gorilla</i>             | Y                                | Y              | Y                                | Y              | L1*                               |
| 96                | <i>Pan paniscus</i>                        | Y                                | Y              | Y                                | Y              | L1*                               |
| 97                | <i>Pan troglodytes</i>                     | Y                                | Y              | Y                                | Y              | L1*                               |
| 98                | <i>Homo sapiens</i>                        | Y                                | Y              | Y                                | Y              | L1*                               |
| <b>SAUROPSIDA</b> |                                            |                                  |                |                                  |                |                                   |
| 99                | <i>Apalone spinifera</i>                   | Y                                | N              | N                                | N              | L1+                               |
| 100               | <i>Pelodiscus sinensis</i>                 | Y                                | N              | Y                                | N              | L1+                               |
| 101               | <i>Chelonia mydas</i>                      | Y                                | N              | Y                                | N              | L1+                               |
| 102               | <i>Chrysemys picta bellii</i>              | Y                                | Y              | Y                                | N              | L1*                               |
| 103               | <i>Struthio camelus<br/>australis</i>      | Y                                | N              | N                                | N              | L1+                               |
| 104               | <i>Tinamus guttatus</i>                    | Y                                | N              | N                                | N              | L1+                               |
| 105               | <i>Anas platyrhynchos</i>                  | Y                                | N              | Y                                | N              | L1+                               |
| 106               | <i>Lyrurus tetrix tetrix</i>               | Y                                | N              | N                                | N              | L1+                               |
| 107               | <i>Gallus gallus</i>                       | Y                                | N              | Y                                | N              | L1+                               |
| 108               | <i>Coturnix japonica</i>                   | Y                                | N              | N                                | N              | L1+                               |
| 109               | <i>Meleagris gallopavo</i>                 | Y                                | N              | N                                | N              | L1+                               |
| 110               | <i>Colinus virginianus</i>                 | Y                                | N              | N                                | N              | L1+                               |
| 111               | <i>Acanthisitta chloris</i>                | Y                                | N              | N                                | N              | L1+                               |
| 112               | <i>Manacus vitellinus</i>                  | Y                                | N              | N                                | N              | L1+                               |
| 113               | <i>Zonotrichia albicollis</i>              | Y                                | N              | N                                | N              | L1+                               |
| 114               | <i>Geospiza fortis</i>                     | Y                                | N              | N                                | N              | L1+                               |
| 115               | <i>Serinus canaria</i>                     | Y                                | N              | N                                | N              | L1+                               |
| 116               | <i>Taeniopygia guttata</i>                 | Y                                | N              | Y                                | N              | L1+                               |
| 117               | <i>Ficedula albicollis</i>                 | Y                                | N              | N                                | N              | L1+                               |
| 118               | <i>Pseudopodoces humilis</i>               | Y                                | N              | N                                | N              | L1+                               |
| 119               | <i>Corvus brachyrhynchos</i>               | Y                                | N              | N                                | N              | L1+                               |
| 120               | <i>Corvus cornix cornix</i>                | Y                                | N              | N                                | N              | L1+                               |
| 121               | <i>Ara macao</i>                           | Y                                | N              | N                                | N              | L1+                               |
| 122               | <i>Amazona vittata</i>                     | Y                                | N              | N                                | N              | L1+                               |

| No  | Species                                    | LASTZ                            |                | TBLASTN                          |                | L1 status<br>(L1-, L1+<br>or L1*) |
|-----|--------------------------------------------|----------------------------------|----------------|----------------------------------|----------------|-----------------------------------|
|     |                                            | Verified<br>L1s in the<br>genome | Intact<br>ORF2 | Verified<br>L1s for the<br>taxon | Intact<br>ORF2 |                                   |
| 123 | <i>Melopsittacus undulatus</i>             | Y                                | N              | N                                | N              | L1+                               |
| 124 | <i>Nestor notabilis</i>                    | Y                                | N              | N                                | N              | L1+                               |
| 125 | <i>Falco cherrug</i>                       | Y                                | N              | N                                | N              | L1+                               |
| 126 | <i>Falco peregrinus</i>                    | Y                                | N              | N                                | N              | L1+                               |
| 127 | <i>Cariama cristata</i>                    | Y                                | N              | N                                | N              | L1+                               |
| 128 | <i>Merops nubicus</i>                      | Y                                | N              | N                                | N              | L1+                               |
| 129 | <i>Picoides pubescens</i>                  | Y                                | N              | N                                | N              | L1+                               |
| 130 | <i>Buceros rhinoceros<br/>silvestris</i>   | Y                                | N              | N                                | N              | L1+                               |
| 131 | <i>Apaloderma vittatum</i>                 | Y                                | N              | N                                | N              | L1+                               |
| 132 | <i>Leptosomus discolor</i>                 | Y                                | N              | N                                | N              | L1+                               |
| 133 | <i>Haliaeetus albicilla</i>                | Y                                | N              | N                                | N              | L1+                               |
| 134 | <i>Haliaeetus leucocephalus</i>            | Y                                | N              | N                                | N              | L1+                               |
| 135 | <i>Aquila chrysaetos<br/>canadensis</i>    | Y                                | N              | N                                | N              | L1+                               |
| 136 | <i>Cathartes aura</i>                      | Y                                | N              | N                                | N              | L1+                               |
| 137 | <i>Tyto alba</i>                           | Y                                | N              | N                                | N              | L1+                               |
| 138 | <i>Colius striatus</i>                     | Y                                | N              | N                                | N              | L1+                               |
| 139 | <i>Charadrius vociferus</i>                | Y                                | N              | N                                | N              | L1+                               |
| 140 | <i>Balearica regulorum<br/>gibbericeps</i> | Y                                | N              | N                                | N              | L1+                               |
| 141 | <i>Chlamydotis macqueenii</i>              | Y                                | N              | N                                | N              | L1+                               |
| 142 | <i>Cuculus canorus</i>                     | Y                                | N              | N                                | N              | L1+                               |
| 143 | <i>Fulmarus glacialis</i>                  | Y                                | N              | N                                | N              | L1+                               |
| 144 | <i>Aptenodytes forsteri</i>                | Y                                | N              | N                                | N              | L1+                               |
| 145 | <i>Pygoscelis adeliae</i>                  | Y                                | N              | N                                | N              | L1+                               |
| 146 | <i>Phalacrocorax carbo</i>                 | Y                                | N              | N                                | N              | L1+                               |
| 147 | <i>Pelecanus crispus</i>                   | Y                                | N              | N                                | N              | L1+                               |
| 148 | <i>Nipponia nippon</i>                     | Y                                | N              | N                                | N              | L1+                               |
| 149 | <i>Egretta garzetta</i>                    | Y                                | N              | N                                | N              | L1+                               |
| 150 | <i>Phaethon lepturus</i>                   | Y                                | N              | N                                | N              | L1+                               |
| 151 | <i>Gavia stellata</i>                      | Y                                | N              | N                                | N              | L1+                               |
| 152 | <i>Tauraco erythrolophus</i>               | Y                                | N              | N                                | N              | L1+                               |
| 153 | <i>Opisthocomus hoazin</i>                 | Y                                | N              | N                                | N              | L1+                               |
| 154 | <i>Columba livia</i>                       | Y                                | N              | N                                | N              | L1+                               |
| 155 | <i>Pterocles gutturalis</i>                | Y                                | N              | N                                | N              | L1+                               |
| 156 | <i>Calypte anna</i>                        | Y                                | N              | N                                | N              | L1+                               |
| 157 | <i>Chaetura pelagica</i>                   | Y                                | N              | N                                | N              | L1+                               |
| 158 | <i>Caprimulgus<br/>carolinensis</i>        | Y                                | N              | N                                | N              | L1+                               |
| 159 | <i>Eurypyga helias</i>                     | Y                                | N              | N                                | N              | L1+                               |
| 160 | <i>Mesitornis unicolor</i>                 | Y                                | N              | N                                | N              | L1+                               |
| 161 | <i>Podiceps cristatus</i>                  | Y                                | N              | N                                | N              | L1+                               |
| 162 | <i>Phoenicopterus ruber<br/>ruber</i>      | Y                                | N              | N                                | N              | L1+                               |
| 163 | <i>Alligator<br/>mississippiensis</i>      | Y                                | N              | Y                                | N              | L1+                               |
| 164 | <i>Alligator sinensis</i>                  | Y                                | N              | Y                                | N              | L1+                               |

| No                    | Species                                | LASTZ                            |                | TBLASTN                          |                | L1 status<br>(L1-, L1+<br>or L1*) |
|-----------------------|----------------------------------------|----------------------------------|----------------|----------------------------------|----------------|-----------------------------------|
|                       |                                        | Verified<br>L1s in the<br>genome | Intact<br>ORF2 | Verified<br>L1s for the<br>taxon | Intact<br>ORF2 |                                   |
| 165                   | <i>Crocodylus porosus</i>              | Y                                | N              | Y                                | N              | L1+                               |
| 166                   | <i>Gavialis gangeticus</i>             | Y                                | N              | N                                | N              | L1+                               |
| 167                   | <i>Pogona vitticeps</i>                | Y                                | N              | Y                                | N              | L1+                               |
| 168                   | <i>Anolis carolinensis</i>             | Y                                | Y              | Y                                | Y              | L1*                               |
| 169                   | <i>Vipera berus berus</i>              | Y                                | Y              | N                                | N              | L1*                               |
| 170                   | <i>Crotalus mitchellii<br/>pyrrhus</i> | Y                                | N              | N                                | N              | L1+                               |
| 171                   | <i>Ophiophagus hannah</i>              | Y                                | N              | Y                                | N              | L1+                               |
| 172                   | <i>Python bivittatus</i>               | Y                                | N              | Y                                | N              | L1+                               |
| <b>AMPHIBIA</b>       |                                        |                                  |                |                                  |                |                                   |
| 173                   | <i>Nanorana parkeri</i>                | Y                                | Y              | N                                | N              | L1*                               |
| 174                   | <i>Xenopus tropicalis</i>              | Y                                | Y              | Y                                | Y              | L1*                               |
| <b>NEOPTERYGII</b>    |                                        |                                  |                |                                  |                |                                   |
| 175                   | <i>Lepisosteus oculatus</i>            | Y                                | Y              | Y                                | N              | L1*                               |
| 176                   | <i>Anguilla anguilla</i>               | Y                                | Y              | N                                | N              | L1*                               |
| 177                   | <i>Anguilla japonica</i>               | Y                                | Y              | N                                | N              | L1*                               |
| 178                   | <i>Danio rerio</i>                     | Y                                | Y              | Y                                | Y              | L1*                               |
| 179                   | <i>Astyanax mexicanus</i>              | Y                                | N              | Y                                | N              | L1+                               |
| 180                   | <i>Oryzias latipes</i>                 | Y                                | Y              | Y                                | Y              | L1*                               |
| 181                   | <i>Poecilia formosa</i>                | Y                                | Y              | Y                                | N              | L1*                               |
| 182                   | <i>Xiphophorus maculatus</i>           | Y                                | Y              | Y                                | N              | L1*                               |
| 183                   | <i>Fundulus heteroclitus</i>           | Y                                | Y              | Y                                | N              | L1*                               |
| 184                   | <i>Takifugu flavidus</i>               | Y                                | N              | N                                | N              | L1+                               |
| 185                   | <i>Takifugu rubripes</i>               | Y                                | N              | Y                                | Y              | L1*                               |
| 186                   | <i>Tetraodon nigroviridis</i>          | Y                                | N              | Y                                | Y              | L1*                               |
| 187                   | <i>Cynoglossus semilaevis</i>          | Y                                | N              | Y                                | N              | L1+                               |
| 188                   | <i>Haplochromis burtoni</i>            | Y                                | Y              | Y                                | Y              | L1*                               |
| 189                   | <i>Pundamilia nyererei</i>             | Y                                | Y              | Y                                | N              | L1*                               |
| 190                   | <i>Maylandia zebra</i>                 | Y                                | Y              | Y                                | N              | L1*                               |
| 191                   | <i>Neolamprologus<br/>brichardi</i>    | Y                                | N              | Y                                | N              | L1+                               |
| 192                   | <i>Oreochromis niloticus</i>           | Y                                | Y              | Y                                | N              | L1*                               |
| 193                   | <i>Sebastes nigrocinctus</i>           | Y                                | N              | N                                | N              | L1+                               |
| 194                   | <i>Sebastes rubrivinctus</i>           | Y                                | N              | N                                | N              | L1+                               |
| 195                   | <i>Gasterosteus aculeatus</i>          | Y                                | Y              | Y                                | N              | L1*                               |
| 196                   | <i>Gadus morhua</i>                    | Y                                | Y              | Y                                | N              | L1*                               |
| <b>CHONDRICHTHYES</b> |                                        |                                  |                |                                  |                |                                   |
| 197                   | <i>Callorhynchus milii</i>             | Y                                | N              | Y                                | N              | L1+                               |
| 198                   | <i>Carcharhinus<br/>brachyurus</i>     | Y                                | N              | N                                | N              | L1+                               |
| <b>ECDYSOZOA</b>      |                                        |                                  |                |                                  |                |                                   |
| 199                   | <i>Ephemera danica</i>                 | N                                | N              | N                                | N              | L1-                               |
| 200                   | <i>Ladona fulva</i>                    | N                                | N              | N                                | N              | L1-                               |
| 201                   | <i>Pediculus humanus<br/>corporis</i>  | N                                | N              | N                                | N              | L1-                               |
| 202                   | <i>Frankliniella<br/>occidentalis</i>  | N                                | N              | N                                | N              | L1-                               |

| No  | Species                              | LASTZ                            |                | TBLASTN                          |                | L1 status<br>(L1-, L1+<br>or L1*) |
|-----|--------------------------------------|----------------------------------|----------------|----------------------------------|----------------|-----------------------------------|
|     |                                      | Verified<br>L1s in the<br>genome | Intact<br>ORF2 | Verified<br>L1s for the<br>taxon | Intact<br>ORF2 |                                   |
| 203 | <i>Diaphorina citri</i>              | N                                | N              | N                                | N              | L1-                               |
| 204 | <i>Pachypsylla venusta</i>           | N                                | N              | N                                | N              | L1-                               |
| 205 | <i>Acyrtosiphon pisum</i>            | N                                | N              | N                                | N              | L1-                               |
| 206 | <i>Nilaparvata lugens</i>            | N                                | N              | N                                | N              | L1-                               |
| 207 | <i>Oncopeltus fasciatus</i>          | N                                | N              | N                                | N              | L1-                               |
| 208 | <i>Rhodnius prolixus</i>             | N                                | N              | N                                | N              | L1-                               |
| 209 | <i>Cimex lectularius</i>             | N                                | N              | N                                | N              | L1-                               |
| 210 | <i>Onthophagus taurus</i>            | N                                | N              | N                                | N              | L1-                               |
| 211 | <i>Agrilus planipennis</i>           | N                                | N              | N                                | N              | L1-                               |
| 212 | <i>Tribolium castaneum</i>           | N                                | N              | N                                | N              | L1-                               |
| 213 | <i>Anoplophora<br/>glabripennis</i>  | N                                | N              | N                                | N              | L1-                               |
| 214 | <i>Leptinotarsa<br/>decemlineata</i> | N                                | N              | N                                | N              | L1-                               |
| 215 | <i>Dendroctonus<br/>ponderosae</i>   | N                                | N              | N                                | N              | L1-                               |
| 216 | <i>Mengenilla moldrzyki</i>          | N                                | N              | N                                | N              | L1-                               |
| 217 | <i>Aedes aegypti</i>                 | Y                                | Y              | Y                                | N              | L1*                               |
| 218 | <i>Culex quinquefasciatus</i>        | Y                                | Y              | Y                                | N              | L1*                               |
| 219 | <i>Anopheles albimanus</i>           | Y                                | N              | N                                | N              | L1+                               |
| 220 | <i>Anopheles arabiensis</i>          | Y                                | N              | N                                | N              | L1+                               |
| 221 | <i>Anopheles atroparvus</i>          | Y                                | N              | N                                | N              | L1+                               |
| 222 | <i>Anopheles christyi</i>            | Y                                | N              | N                                | N              | L1+                               |
| 223 | <i>Anopheles culicifacies</i>        | Y                                | N              | N                                | N              | L1+                               |
| 224 | <i>Anopheles darlingi</i>            | Y                                | Y              | N                                | N              | L1*                               |
| 225 | <i>Anopheles dirus</i>               | Y                                | N              | N                                | N              | L1+                               |
| 226 | <i>Anopheles epiroticus</i>          | Y                                | N              | N                                | N              | L1+                               |
| 227 | <i>Anopheles farauti</i>             | Y                                | N              | N                                | N              | L1+                               |
| 228 | <i>Anopheles funestus</i>            | Y                                | Y              | N                                | N              | L1*                               |
| 229 | <i>Anopheles gambiae</i>             | Y                                | Y              | Y                                | Y              | L1*                               |
| 230 | <i>Anopheles maculatus</i>           | Y                                | N              | N                                | N              | L1+                               |
| 231 | <i>Anopheles melas</i>               | Y                                | N              | N                                | N              | L1+                               |
| 232 | <i>Anopheles merus</i>               | Y                                | N              | N                                | N              | L1+                               |
| 233 | <i>Anopheles minimus</i>             | Y                                | N              | N                                | N              | L1+                               |
| 234 | <i>Anopheles<br/>quadriannulatus</i> | Y                                | N              | N                                | N              | L1+                               |
| 235 | <i>Anopheles sinensis</i>            | Y                                | Y              | N                                | N              | L1*                               |
| 236 | <i>Anopheles stephensi</i>           | Y                                | N              | N                                | N              | L1+                               |
| 237 | <i>Mayetiola destructor</i>          | N                                | N              | N                                | N              | L1-                               |
| 238 | <i>Lutzomyia longipalpis</i>         | N                                | N              | N                                | N              | L1-                               |
| 239 | <i>Phlebotomus papatasi</i>          | N                                | N              | N                                | N              | L1-                               |
| 240 | <i>Ceratitis capitata</i>            | Y                                | N              | Y                                | N              | L1+                               |
| 241 | <i>Drosophila albomicans</i>         | Y                                | N              | N                                | N              | L1+                               |
| 242 | <i>Drosophila ananassae</i>          | Y                                | N              | N                                | N              | L1+                               |
| 243 | <i>Drosophila biarmipes</i>          | Y                                | N              | N                                | N              | L1+                               |
| 244 | <i>Drosophila bipectinata</i>        | Y                                | N              | N                                | N              | L1+                               |
| 245 | <i>Drosophila elegans</i>            | Y                                | N              | N                                | N              | L1+                               |
| 246 | <i>Drosophila erecta</i>             | Y                                | N              | N                                | N              | L1+                               |



| No  | Species                                       | LASTZ                            |                | TBLASTN                          |                | L1 status<br>(L1-, L1+<br>or L1*) |
|-----|-----------------------------------------------|----------------------------------|----------------|----------------------------------|----------------|-----------------------------------|
|     |                                               | Verified<br>L1s in the<br>genome | Intact<br>ORF2 | Verified<br>L1s for the<br>taxon | Intact<br>ORF2 |                                   |
| 247 | <i>Drosophila eugracilis</i>                  | Y                                | N              | N                                | N              | L1+                               |
| 248 | <i>Drosophila ficusphila</i>                  | Y                                | Y              | N                                | N              | L1*                               |
| 249 | <i>Drosophila grimshawi</i>                   | Y                                | N              | N                                | N              | L1+                               |
| 250 | <i>Drosophila kikkawai</i>                    | Y                                | N              | N                                | N              | L1+                               |
| 251 | <i>Drosophila melanogaster</i>                | Y                                | N              | Y                                | N              | L1+                               |
| 252 | <i>Drosophila miranda</i>                     | Y                                | N              | N                                | N              | L1+                               |
| 253 | <i>Drosophila mojavensis</i>                  | Y                                | N              | N                                | N              | L1+                               |
| 254 | <i>Drosophila persimilis</i>                  | Y                                | N              | N                                | N              | L1+                               |
| 255 | <i>Drosophila pseudoobscura pseudoobscura</i> | Y                                | N              | N                                | N              | L1+                               |
| 256 | <i>Drosophila rhopaloa</i>                    | Y                                | N              | N                                | N              | L1+                               |
| 257 | <i>Drosophila sechellia</i>                   | Y                                | N              | N                                | N              | L1+                               |
| 258 | <i>Drosophila simulans</i>                    | Y                                | N              | N                                | N              | L1+                               |
| 259 | <i>Drosophila suzukii</i>                     | Y                                | N              | N                                | N              | L1+                               |
| 260 | <i>Drosophila takahashii</i>                  | Y                                | N              | N                                | N              | L1+                               |
| 261 | <i>Drosophila virilis</i>                     | Y                                | N              | N                                | N              | L1+                               |
| 262 | <i>Drosophila willistoni</i>                  | Y                                | N              | N                                | N              | L1+                               |
| 263 | <i>Drosophila yakuba</i>                      | Y                                | N              | N                                | N              | L1+                               |
| 264 | <i>Musca domestica</i>                        | Y                                | N              | Y                                | N              | L1+                               |
| 265 | <i>Glossina austeni</i>                       | Y                                | N              | N                                | N              | L1+                               |
| 266 | <i>Glossina brevipalpis</i>                   | Y                                | N              | N                                | N              | L1+                               |
| 267 | <i>Glossina fuscipes fuscipes</i>             | Y                                | N              | N                                | N              | L1+                               |
| 268 | <i>Glossina morsitans morsitans</i>           | Y                                | N              | N                                | N              | L1+                               |
| 269 | <i>Glossina pallidipes</i>                    | Y                                | N              | N                                | N              | L1+                               |
| 270 | <i>Limnephilus lunatus</i>                    | N                                | N              | N                                | N              | L1-                               |
| 271 | <i>Papilio glaucus</i>                        | N                                | N              | N                                | N              | L1-                               |
| 272 | <i>Papilio polytes</i>                        | N                                | N              | N                                | N              | L1-                               |
| 273 | <i>Papilio ruthus</i>                         | N                                | N              | N                                | N              | L1-                               |
| 274 | <i>Heliconius melpomene melpomene</i>         | N                                | N              | N                                | N              | L1-                               |
| 275 | <i>Melitaea cinxia</i>                        | N                                | N              | N                                | N              | L1-                               |
| 276 | <i>Danaus plexippus</i>                       | N                                | N              | N                                | N              | L1-                               |
| 277 | <i>Bombyx mori</i>                            | N                                | N              | N                                | N              | L1-                               |
| 278 | <i>Manduca sexta</i>                          | N                                | N              | N                                | N              | L1-                               |
| 279 | <i>Plutella xylostella</i>                    | N                                | N              | N                                | N              | L1-                               |
| 280 | <i>Athalia rosae</i>                          | N                                | N              | N                                | N              | L1-                               |
| 281 | <i>Cephus cinctus</i>                         | N                                | N              | N                                | N              | L1-                               |
| 282 | <i>Orussus abietinus</i>                      | Y                                | N              | Y                                | N              | L1+                               |
| 283 | <i>Ceratosolen solmsi marchali</i>            | N                                | N              | N                                | N              | L1-                               |
| 284 | <i>Nasonia giraulti</i>                       | N                                | N              | N                                | N              | L1-                               |
| 285 | <i>Nasonia longicornis</i>                    | N                                | N              | N                                | N              | L1-                               |
| 286 | <i>Nasonia vitripennis</i>                    | N                                | N              | N                                | N              | L1-                               |
| 287 | <i>Copidosoma floridanum</i>                  | N                                | N              | N                                | N              | L1-                               |

| No  | Species                             | LASTZ                            |                | TBLASTN                          |                | L1 status<br>(L1-, L1+<br>or L1*) |
|-----|-------------------------------------|----------------------------------|----------------|----------------------------------|----------------|-----------------------------------|
|     |                                     | Verified<br>L1s in the<br>genome | Intact<br>ORF2 | Verified<br>L1s for the<br>taxon | Intact<br>ORF2 |                                   |
| 288 | <i>Trichogramma pretiosum</i>       | N                                | N              | N                                | N              | L1-                               |
| 289 | <i>Microplitis demolitor</i>        | Y                                | N              | Y                                | N              | L1+                               |
| 290 | <i>Megachile rotundata</i>          | N                                | N              | N                                | N              | L1-                               |
| 291 | <i>Apis dorsata</i>                 | N                                | N              | N                                | N              | L1-                               |
| 292 | <i>Apis florea</i>                  | N                                | N              | N                                | N              | L1-                               |
| 293 | <i>Apis mellifera</i>               | N                                | N              | N                                | N              | L1-                               |
| 294 | <i>Bombus impatiens</i>             | N                                | N              | N                                | N              | L1-                               |
| 295 | <i>Bombus terrestris</i>            | N                                | N              | N                                | N              | L1-                               |
| 296 | <i>Linepithema humile</i>           | N                                | N              | N                                | N              | L1-                               |
| 297 | <i>Camponotus floridanus</i>        | N                                | N              | N                                | N              | L1-                               |
| 298 | <i>Acromyrmex echinator</i>         | N                                | N              | N                                | N              | L1-                               |
| 299 | <i>Atta cephalotes</i>              | N                                | N              | N                                | N              | L1-                               |
| 300 | <i>Solenopsis invicta</i>           | N                                | N              | N                                | N              | L1-                               |
| 301 | <i>Pogonomyrmex barbatus</i>        | N                                | N              | N                                | N              | L1-                               |
| 302 | <i>Harpegnathos saltator</i>        | N                                | N              | N                                | N              | L1-                               |
| 303 | <i>Cerapachys biroi</i>             | N                                | N              | N                                | N              | L1-                               |
| 304 | <i>Blattella germanica</i>          | Y                                | Y              | Y                                | Y              | L1*                               |
| 305 | <i>Zootermopsis nevadensis</i>      | Y                                | N              | N                                | N              | L1+                               |
| 306 | <i>Daphnia pulex</i>                | Y                                | N              | Y                                | N              | L1+                               |
| 307 | <i>Eurytemora affinis</i>           | Y                                | N              | N                                | N              | L1+                               |
| 308 | <i>Hyalella azteca</i>              | Y                                | N              | N                                | N              | L1+                               |
| 309 | <i>Strigamia maritima</i>           | N                                | N              | N                                | N              | L1-                               |
| 310 | <i>Stegodyphus mimosarum</i>        | N                                | N              | N                                | N              | L1-                               |
| 311 | <i>Latrodectus hesperus</i>         | Y                                | N              | Y                                | N              | L1+                               |
| 312 | <i>Parasteatoda tepidariorum</i>    | N                                | N              | N                                | N              | L1-                               |
| 313 | <i>Tetranychus urticae</i>          | N                                | N              | N                                | N              | L1-                               |
| 314 | <i>Dermatophagoides farinae</i>     | N                                | N              | N                                | N              | L1-                               |
| 315 | <i>Sarcoptes scabiei type canis</i> | N                                | N              | N                                | N              | L1-                               |
| 316 | <i>Achipteria coleoptrata</i>       | N                                | N              | N                                | N              | L1-                               |
| 317 | <i>Hypochthonius rufulus</i>        | N                                | N              | N                                | N              | L1-                               |
| 318 | <i>Platynocheilus peltifer</i>      | N                                | N              | N                                | N              | L1-                               |
| 319 | <i>Steganacarus magnus</i>          | N                                | N              | N                                | N              | L1-                               |
| 320 | <i>Ixodes ricinus</i>               | Y                                | Y              | N                                | N              | L1*                               |
| 321 | <i>Ixodes scapularis</i>            | Y                                | N              | Y                                | Y              | L1*                               |
| 322 | <i>Rhipicephalus microplus</i>      | Y                                | N              | Y                                | N              | L1+                               |
| 323 | <i>Metaseiulus occidentalis</i>     | Y                                | N              | Y                                | N              | L1+                               |
| 324 | <i>Varroa destructor</i>            | N                                | N              | N                                | N              | L1-                               |
| 325 | <i>Centruroides exilicauda</i>      | Y                                | Y              | N                                | N              | L1*                               |
| 326 | <i>Mesobuthus martensii</i>         | N                                | N              | N                                | N              | L1-                               |
| 327 | <i>Limulus polyphemus</i>           | Y                                | N              | Y                                | N              | L1+                               |
| 328 | <i>Trichinella spiralis</i>         | Y                                | N              | Y                                | N              | L1+                               |
| 329 | <i>Ascaris suum</i>                 | N                                | N              | N                                | N              | L1-                               |

| No                     | Species                                   | LASTZ                            |                | TBLASTN                          |                | L1 status<br>(L1-, L1+<br>or L1*) |
|------------------------|-------------------------------------------|----------------------------------|----------------|----------------------------------|----------------|-----------------------------------|
|                        |                                           | Verified<br>L1s in the<br>genome | Intact<br>ORF2 | Verified<br>L1s for the<br>taxon | Intact<br>ORF2 |                                   |
| 330                    | <i>Elaeophora elaphi</i>                  | N                                | N              | N                                | N              | L1-                               |
| 331                    | <i>Onchocerca volvulus</i>                | N                                | N              | N                                | N              | L1-                               |
| 332                    | <i>Steinernema monticolum</i>             | N                                | N              | N                                | N              | L1-                               |
| 333                    | <i>Panagrellus redivivus</i>              | N                                | N              | N                                | N              | L1-                               |
| 334                    | <i>Haemonchus contortus</i>               | N                                | N              | N                                | N              | L1-                               |
| 335                    | <i>Necator americanus</i>                 | N                                | N              | N                                | N              | L1-                               |
| 336                    | <i>Heterorhabditis bacteriophora</i>      | N                                | N              | N                                | N              | L1-                               |
| 337                    | <i>Caenorhabditis angaria</i>             | N                                | N              | N                                | N              | L1-                               |
| 338                    | <i>Caenorhabditis brenneri</i>            | N                                | N              | N                                | N              | L1-                               |
| 339                    | <i>Caenorhabditis briggsae</i>            | N                                | N              | N                                | N              | L1-                               |
| 340                    | <i>Caenorhabditis elegans</i>             | N                                | N              | N                                | N              | L1-                               |
| 341                    | <i>Caenorhabditis japonica</i>            | N                                | N              | N                                | N              | L1-                               |
| 342                    | <i>Caenorhabditis sp. 11<br/>MAF-2010</i> | N                                | N              | N                                | N              | L1-                               |
| 343                    | <i>Priapulus caudatus</i>                 | N                                | N              | N                                | N              | L1-                               |
| <b>ROTIFERA</b>        |                                           |                                  |                |                                  |                |                                   |
| 344                    | <i>Adineta vaga</i>                       | Y                                | N              | N                                | N              | L1+                               |
| <b>PLATYHELMINTHES</b> |                                           |                                  |                |                                  |                |                                   |
| 345                    | <i>Schistosoma curassoni</i>              | Y                                | N              | Y                                | N              | L1+                               |
| 346                    | <i>Schistosoma haematobium</i>            | Y                                | N              | N                                | N              | L1+                               |
| 347                    | <i>Schistosoma japonicum</i>              | Y                                | N              | Y                                | N              | L1+                               |
| 348                    | <i>Schistosoma mansoni</i>                | Y                                | N              | Y                                | N              | L1+                               |
| 349                    | <i>Schistosoma margrebowiei</i>           | Y                                | N              | N                                | N              | L1+                               |
| 350                    | <i>Schistosoma mattheei</i>               | Y                                | N              | Y                                | N              | L1+                               |
| 351                    | <i>Schistosoma rodhaini</i>               | Y                                | N              | N                                | N              | L1+                               |
| 352                    | <i>Clonorchis sinensis</i>                | Y                                | N              | N                                | N              | L1+                               |
| 353                    | <i>Echinococcus granulosus</i>            | N                                | N              | N                                | N              | L1-                               |
| 354                    | <i>Echinococcus multilocularis</i>        | N                                | N              | N                                | N              | L1-                               |
| 355                    | <i>Hymenolepis microstoma</i>             | N                                | N              | N                                | N              | L1-                               |
| <b>ANNELIDA</b>        |                                           |                                  |                |                                  |                |                                   |
| 356                    | <i>Capitella teleta</i>                   | Y                                | N              | N                                | N              | L1+                               |
| 357                    | <i>Helobdella robusta</i>                 | Y                                | N              | Y                                | N              | L1+                               |
| <b>MOLLUSCA</b>        |                                           |                                  |                |                                  |                |                                   |
| 358                    | <i>Crassostrea gigas</i>                  | Y                                | Y              | Y                                | Y              | L1*                               |
| 359                    | <i>Lottia gigantea</i>                    | Y                                | N              | Y                                | N              | L1+                               |
| 360                    | <i>Aplysia californica</i>                | Y                                | Y              | Y                                | N              | L1*                               |
| 361                    | <i>Biomphalaria glabrata</i>              | Y                                | N              | Y                                | Y              | L1*                               |
| <b>CNIDARIA</b>        |                                           |                                  |                |                                  |                |                                   |
| 362                    | <i>Nematostella vectensis</i>             | Y                                | Y              | Y                                | N              | L1*                               |
| 363                    | <i>Hydra vulgaris</i>                     | Y                                | Y              | Y                                | N              | L1*                               |
| <b>TENTACULATA</b>     |                                           |                                  |                |                                  |                |                                   |

| No                   | Species                                            | LASTZ                            |                | TBLASTN                          |                | L1 status<br>(L1-, L1+<br>or L1*) |
|----------------------|----------------------------------------------------|----------------------------------|----------------|----------------------------------|----------------|-----------------------------------|
|                      |                                                    | Verified<br>L1s in the<br>genome | Intact<br>ORF2 | Verified<br>L1s for the<br>taxon | Intact<br>ORF2 |                                   |
| 364                  | <i>Mnemiopsis leidyi</i>                           | N                                | N              | N                                | N              | L1-                               |
| <b>PLACOZOA</b>      |                                                    |                                  |                |                                  |                |                                   |
| 365                  | <i>Trichoplax adhaerens</i>                        | N                                | N              | N                                | N              | L1-                               |
| <b>PORIFERA</b>      |                                                    |                                  |                |                                  |                |                                   |
| 366                  | <i>Amphimedon queenslandica</i>                    | N                                | N              | N                                | N              | L1-                               |
| <b>VIRIDIPLANTAE</b> |                                                    |                                  |                |                                  |                |                                   |
| 367                  | <i>Micromonas pusilla</i><br><i>CCMP1545</i>       | N                                | N              | N                                | N              | L1-                               |
| 368                  | <i>Micromonas</i> sp.<br><i>RCC299</i>             | N                                | N              | N                                | N              | L1-                               |
| 369                  | <i>Ostreococcus</i><br><i>lucimarinus CCE9901</i>  | N                                | N              | N                                | N              | L1-                               |
| 370                  | <i>Ostreococcus tauri</i>                          | N                                | N              | N                                | N              | L1-                               |
| 371                  | <i>Chlamydomonas</i><br><i>reinhardtii</i>         | Y                                | Y              | Y                                | N              | L1*                               |
| 372                  | <i>Volvox carteri</i> f.<br><i>nagariensis</i>     | Y                                | Y              | Y                                | N              | L1*                               |
| 373                  | <i>Chlorella variabilis</i>                        | Y                                | N              | Y                                | N              | L1+                               |
| 374                  | <i>Auxenochlorella</i><br><i>protothecoides</i>    | N                                | N              | N                                | N              | L1-                               |
| 375                  | <i>Helicosporidium</i> sp.<br><i>ATCC 50920</i>    | N                                | N              | N                                | N              | L1-                               |
| 376                  | <i>Coccomyxa</i><br><i>subellipsoidea C-169</i>    | Y                                | Y              | Y                                | N              | L1*                               |
| 377                  | <i>Klebsormidium</i><br><i>flaccidum</i>           | N                                | N              | N                                | N              | L1-                               |
| 378                  | <i>Physcomitrella patens</i>                       | Y                                | N              | Y                                | N              | L1+                               |
| 379                  | <i>Selaginella</i><br><i>moellendorffii</i>        | Y                                | Y              | Y                                | N              | L1*                               |
| 380                  | <i>Pinus taeda</i>                                 | Y                                | Y              | Y                                | Y              | L1*                               |
| 381                  | <i>Amborella trichopoda</i>                        | Y                                | N              | Y                                | N              | L1+                               |
| 382                  | <i>Spirodela polyrhiza</i>                         | Y                                | N              | Y                                | N              | L1+                               |
| 383                  | <i>Phoenix dactylifera</i>                         | Y                                | Y              | Y                                | Y              | L1*                               |
| 384                  | <i>Elaeis oleifera</i>                             | Y                                | N              | N                                | N              | L1+                               |
| 385                  | <i>Ensete ventricosum</i>                          | Y                                | N              | N                                | N              | L1+                               |
| 386                  | <i>Musa acuminata</i> subsp.<br><i>malaccensis</i> | Y                                | N              | Y                                | N              | L1+                               |
| 387                  | <i>Sorghum bicolor</i>                             | Y                                | Y              | Y                                | Y              | L1*                               |
| 388                  | <i>Zea mays</i>                                    | Y                                | Y              | Y                                | Y              | L1*                               |
| 389                  | <i>Setaria italica</i>                             | Y                                | Y              | Y                                | Y              | L1*                               |
| 390                  | <i>Brachypodium</i><br><i>distachyon</i>           | Y                                | Y              | Y                                | Y              | L1*                               |
| 391                  | <i>Leersia perrieri</i>                            | Y                                | Y              | Y                                | N              | L1*                               |
| 392                  | <i>Oryza barthii</i>                               | Y                                | Y              | N                                | N              | L1*                               |
| 393                  | <i>Oryza brachyantha</i>                           | Y                                | Y              | Y                                | N              | L1*                               |
| 394                  | <i>Oryza glumipatula</i>                           | Y                                | Y              | Y                                | N              | L1*                               |
| 395                  | <i>Oryza longistaminata</i>                        | Y                                | Y              | N                                | N              | L1*                               |

| No  | Species                                       | LASTZ                            |                | TBLASTN                          |                | L1 status<br>(L1-, L1+<br>or L1*) |
|-----|-----------------------------------------------|----------------------------------|----------------|----------------------------------|----------------|-----------------------------------|
|     |                                               | Verified<br>L1s in the<br>genome | Intact<br>ORF2 | Verified<br>L1s for the<br>taxon | Intact<br>ORF2 |                                   |
| 396 | <i>Oryza meridionalis</i>                     | Y                                | Y              | N                                | N              | L1*                               |
| 397 | <i>Oryza nivara</i>                           | Y                                | Y              | N                                | N              | L1*                               |
| 398 | <i>Oryza punctata</i>                         | Y                                | Y              | Y                                | N              | L1*                               |
| 399 | <i>Oryza sativa Japonica Group</i>            | Y                                | Y              | Y                                | Y              | L1*                               |
| 400 | <i>Zizania latifolia</i>                      | Y                                | Y              | N                                | N              | L1*                               |
| 401 | <i>Aegilops tauschii</i>                      | Y                                | Y              | Y                                | N              | L1*                               |
| 402 | <i>Triticum urartu</i>                        | Y                                | Y              | Y                                | N              | L1*                               |
| 403 | <i>Nelumbo nucifera</i>                       | Y                                | Y              | Y                                | N              | L1*                               |
| 404 | <i>Lupinus angustifolius</i>                  | Y                                | Y              | Y                                | N              | L1*                               |
| 405 | <i>Phaseolus vulgaris</i>                     | Y                                | Y              | Y                                | Y              | L1*                               |
| 406 | <i>Cajanus cajan</i>                          | Y                                | Y              | N                                | N              | L1*                               |
| 407 | <i>Vigna angularis var. angularis</i>         | Y                                | N              | Y                                | N              | L1+                               |
| 408 | <i>Vigna radiata var. radiata</i>             | Y                                | N              | Y                                | N              | L1+                               |
| 409 | <i>Glycine max</i>                            | Y                                | Y              | Y                                | Y              | L1*                               |
| 410 | <i>Glycine soja</i>                           | Y                                | Y              | Y                                | N              | L1*                               |
| 411 | <i>Cicer arietinum</i>                        | Y                                | N              | Y                                | N              | L1+                               |
| 412 | <i>Medicago truncatula</i>                    | Y                                | Y              | Y                                | Y              | L1*                               |
| 413 | <i>Trifolium pratense</i>                     | Y                                | Y              | Y                                | N              | L1*                               |
| 414 | <i>Lotus japonicus</i>                        | Y                                | N              | Y                                | Y              | L1*                               |
| 415 | <i>Malus x domestica</i>                      | Y                                | Y              | Y                                | Y              | L1*                               |
| 416 | <i>Pyrus x bretschneideri</i>                 | Y                                | Y              | Y                                | Y              | L1*                               |
| 417 | <i>Prunus mume</i>                            | Y                                | Y              | Y                                | Y              | L1*                               |
| 418 | <i>Prunus persica</i>                         | Y                                | Y              | Y                                | Y              | L1*                               |
| 419 | <i>Fragaria iinumae</i>                       | Y                                | N              | N                                | N              | L1+                               |
| 420 | <i>Fragaria nubicola</i>                      | Y                                | N              | N                                | N              | L1+                               |
| 421 | <i>Fragaria orientalis</i>                    | Y                                | N              | N                                | N              | L1+                               |
| 422 | <i>Fragaria vesca subsp. vesca</i>            | Y                                | Y              | Y                                | Y              | L1*                               |
| 423 | <i>Fragaria x ananassa</i>                    | Y                                | Y              | N                                | N              | L1*                               |
| 424 | <i>Morus notabilis</i>                        | Y                                | N              | Y                                | N              | L1+                               |
| 425 | <i>Cannabis sativa</i>                        | Y                                | Y              | Y                                | N              | L1*                               |
| 426 | <i>Castanea mollissima</i>                    | Y                                | Y              | N                                | N              | L1*                               |
| 427 | <i>Betula nana</i>                            | Y                                | Y              | N                                | N              | L1*                               |
| 428 | <i>Cucumis melo</i>                           | Y                                | Y              | Y                                | Y              | L1*                               |
| 429 | <i>Cucumis sativus</i>                        | Y                                | Y              | Y                                | N              | L1*                               |
| 430 | <i>Citrullus lanatus</i>                      | Y                                | N              | Y                                | N              | L1+                               |
| 431 | <i>Lagenaria siceraria</i>                    | Y                                | N              | N                                | N              | L1+                               |
| 432 | <i>Populus euphratica</i>                     | Y                                | Y              | Y                                | N              | L1*                               |
| 433 | <i>Populus trichocarpa</i>                    | Y                                | Y              | Y                                | Y              | L1*                               |
| 434 | <i>Jatropha curcas</i>                        | Y                                | Y              | Y                                | Y              | L1*                               |
| 435 | <i>Manihot esculenta subsp. flabellifolia</i> | Y                                | Y              | N                                | N              | L1*                               |
| 436 | <i>Ricinus communis</i>                       | Y                                | N              | Y                                | N              | L1+                               |
| 437 | <i>Linum usitatissimum</i>                    | Y                                | Y              | Y                                | N              | L1*                               |

| No  | Species                                                    | LASTZ                            |                | TBLASTN                          |                | L1 status<br>(L1-, L1+<br>or L1*) |
|-----|------------------------------------------------------------|----------------------------------|----------------|----------------------------------|----------------|-----------------------------------|
|     |                                                            | Verified<br>L1s in the<br>genome | Intact<br>ORF2 | Verified<br>L1s for the<br>taxon | Intact<br>ORF2 |                                   |
| 438 | <i>Eucalyptus camaldulensis</i>                            | Y                                | Y              | N                                | N              | L1*                               |
| 439 | <i>Eucalyptus grandis</i>                                  | Y                                | Y              | Y                                | Y              | L1*                               |
| 440 | <i>Carica papaya</i>                                       | Y                                | N              | Y                                | N              | L1+                               |
| 441 | <i>Arabidopsis halleri</i><br><i>subsp. gemmifera</i>      | Y                                | Y              | N                                | N              | L1*                               |
| 442 | <i>Arabidopsis lyrata subsp.</i><br><i>lyrata</i>          | Y                                | Y              | Y                                | N              | L1*                               |
| 443 | <i>Arabidopsis thaliana</i>                                | Y                                | Y              | Y                                | Y              | L1*                               |
| 444 | <i>Camelina sativa</i>                                     | Y                                | Y              | Y                                | Y              | L1*                               |
| 445 | <i>Capsella rubella</i>                                    | Y                                | Y              | Y                                | Y              | L1*                               |
| 446 | <i>Brassica napus</i>                                      | Y                                | Y              | Y                                | Y              | L1*                               |
| 447 | <i>Brassica oleracea var.</i><br><i>oleracea</i>           | Y                                | Y              | Y                                | Y              | L1*                               |
| 448 | <i>Brassica rapa</i>                                       | Y                                | Y              | Y                                | Y              | L1*                               |
| 449 | <i>Raphanus raphanistrum</i><br><i>subsp. raphanistrum</i> | Y                                | Y              | N                                | N              | L1*                               |
| 450 | <i>Raphanus sativus</i>                                    | Y                                | Y              | Y                                | Y              | L1*                               |
| 451 | <i>Aethionema arabicum</i>                                 | Y                                | Y              | N                                | N              | L1*                               |
| 452 | <i>Arabis alpina</i>                                       | Y                                | Y              | Y                                | N              | L1*                               |
| 453 | <i>Eutrema parvulum</i>                                    | Y                                | Y              | N                                | N              | L1*                               |
| 454 | <i>Eutrema salsugineum</i>                                 | Y                                | Y              | Y                                | N              | L1*                               |
| 455 | <i>Sisymbrium irio</i>                                     | Y                                | Y              | Y                                | N              | L1*                               |
| 456 | <i>Leavenworthia alabamica</i>                             | Y                                | Y              | Y                                | N              | L1*                               |
| 457 | <i>Tarenaya hassleriana</i>                                | Y                                | Y              | Y                                | Y              | L1*                               |
| 458 | <i>Gossypium arboreum</i>                                  | Y                                | Y              | Y                                | N              | L1*                               |
| 459 | <i>Gossypium raimondii</i>                                 | Y                                | Y              | Y                                | Y              | L1*                               |
| 460 | <i>Theobroma cacao</i>                                     | Y                                | Y              | Y                                | Y              | L1*                               |
| 461 | <i>Aquilaria agallochum</i>                                | Y                                | Y              | N                                | N              | L1*                               |
| 462 | <i>Azadirachta indica</i>                                  | Y                                | N              | N                                | N              | L1+                               |
| 463 | <i>Citrus clementina</i>                                   | Y                                | Y              | Y                                | N              | L1*                               |
| 464 | <i>Citrus sinensis</i>                                     | Y                                | Y              | Y                                | Y              | L1*                               |
| 465 | <i>Vitis vinifera</i>                                      | Y                                | Y              | Y                                | Y              | L1*                               |
| 466 | <i>Amaranthus hypochondriacus</i>                          | Y                                | N              | Y                                | N              | L1+                               |
| 467 | <i>Amaranthus tuberculatus</i>                             | Y                                | N              | N                                | N              | L1+                               |
| 468 | <i>Beta vulgaris subsp.</i><br><i>vulgaris</i>             | Y                                | Y              | Y                                | Y              | L1*                               |
| 469 | <i>Spinacia oleracea</i>                                   | Y                                | Y              | Y                                | N              | L1*                               |
| 470 | <i>Dianthus caryophyllus</i>                               | Y                                | Y              | Y                                | N              | L1*                               |
| 471 | <i>Actinidia chinensis</i>                                 | Y                                | Y              | N                                | N              | L1*                               |
| 472 | <i>Vaccinium macrocarpon</i>                               | Y                                | Y              | Y                                | N              | L1*                               |
| 473 | <i>Diospyros lotus</i>                                     | Y                                | N              | N                                | N              | L1+                               |
| 474 | <i>Primula veris</i>                                       | Y                                | Y              | N                                | N              | L1*                               |
| 475 | <i>Solanum arcanum</i>                                     | Y                                | Y              | N                                | N              | L1*                               |
| 476 | <i>Solanum habrochaites</i>                                | Y                                | Y              | Y                                | N              | L1*                               |

| No                        | Species                                  | LASTZ                            |                | TBLASTN                          |                | L1 status<br>(L1-, L1+<br>or L1*) |
|---------------------------|------------------------------------------|----------------------------------|----------------|----------------------------------|----------------|-----------------------------------|
|                           |                                          | Verified<br>L1s in the<br>genome | Intact<br>ORF2 | Verified<br>L1s for the<br>taxon | Intact<br>ORF2 |                                   |
| 477                       | <i>Solanum lycopersicum</i>              | Y                                | Y              | Y                                | Y              | L1*                               |
| 478                       | <i>Solanum melongena</i>                 | Y                                | N              | N                                | N              | L1+                               |
| 479                       | <i>Solanum pennellii</i>                 | Y                                | Y              | Y                                | Y              | L1*                               |
| 480                       | <i>Solanum<br/>pimpinellifolium</i>      | Y                                | Y              | Y                                | N              | L1*                               |
| 481                       | <i>Solanum tuberosum</i>                 | Y                                | Y              | Y                                | Y              | L1*                               |
| 482                       | <i>Capsicum annuum</i>                   | Y                                | Y              | Y                                | N              | L1*                               |
| 483                       | <i>Nicotiana glauca</i>                  | Y                                | Y              | Y                                | N              | L1*                               |
| 484                       | <i>Nicotiana<br/>tomentosiformis</i>     | Y                                | Y              | Y                                | N              | L1*                               |
| 485                       | <i>Fraxinus excelsior</i>                | Y                                | Y              | N                                | N              | L1*                               |
| 486                       | <i>Penstemon<br/>centranthifolius</i>    | Y                                | N              | N                                | N              | L1+                               |
| 487                       | <i>Penstemon grinnellii</i>              | Y                                | N              | N                                | N              | L1+                               |
| 488                       | <i>Sesamum indicum</i>                   | Y                                | Y              | Y                                | Y              | L1*                               |
| 489                       | <i>Genlisea aurea</i>                    | Y                                | N              | N                                | N              | L1+                               |
| 490                       | <i>Mimulus guttatus</i>                  | Y                                | Y              | Y                                | Y              | L1*                               |
| 491                       | <i>Conyza canadensis</i>                 | Y                                | Y              | N                                | N              | L1*                               |
| <b>ECHINOIDEA</b>         |                                          |                                  |                |                                  |                |                                   |
| 492                       | <i>Lytechinus variegatus</i>             | Y                                | N              | Y                                | Y              | L1*                               |
| 493                       | <i>Strongylocentrotus<br/>purpuratus</i> | Y                                | Y              | Y                                | Y              | L1*                               |
| <b>ASTEROIDEA</b>         |                                          |                                  |                |                                  |                |                                   |
| 494                       | <i>Patiria miniata</i>                   | Y                                | Y              | N                                | N              | L1*                               |
| <b>ENTEROPNEUSTA</b>      |                                          |                                  |                |                                  |                |                                   |
| 495                       | <i>Saccoglossus kowalevskii</i>          | Y                                | Y              | Y                                | Y              | L1*                               |
| <b>TUNICATA</b>           |                                          |                                  |                |                                  |                |                                   |
| 496                       | <i>Ciona intestinalis</i>                | Y                                | N              | Y                                | Y              | L1*                               |
| 497                       | <i>Ciona savignyi</i>                    | Y                                | Y              | Y                                | Y              | L1*                               |
| 498                       | <i>Botryllus schlosseri</i>              | Y                                | N              | N                                | N              | L1+                               |
| 499                       | <i>Oikopleura dioica</i>                 | N                                | N              | N                                | N              | L1-                               |
| <b>LEPTOCARDII</b>        |                                          |                                  |                |                                  |                |                                   |
| 500                       | <i>Branchiostoma floridae</i>            | Y                                | Y              | Y                                | Y              | L1*                               |
| <b>CEPHALASPIDOMORPHI</b> |                                          |                                  |                |                                  |                |                                   |
| 501                       | <i>Lethenteron<br/>camtschaticum</i>     | Y                                | Y              | Y                                | N              | L1*                               |
| 502                       | <i>Petromyzon marinus</i>                | Y                                | Y              | N                                | N              | L1*                               |
| <b>SARCOPTERYGII</b>      |                                          |                                  |                |                                  |                |                                   |
| 503                       | <i>Latimeria chalumnae</i>               | Y                                | Y              | Y                                | N              | L1*                               |

### 3.2.3 Figure 5: L1 activity superimposed on the inferred tree of life

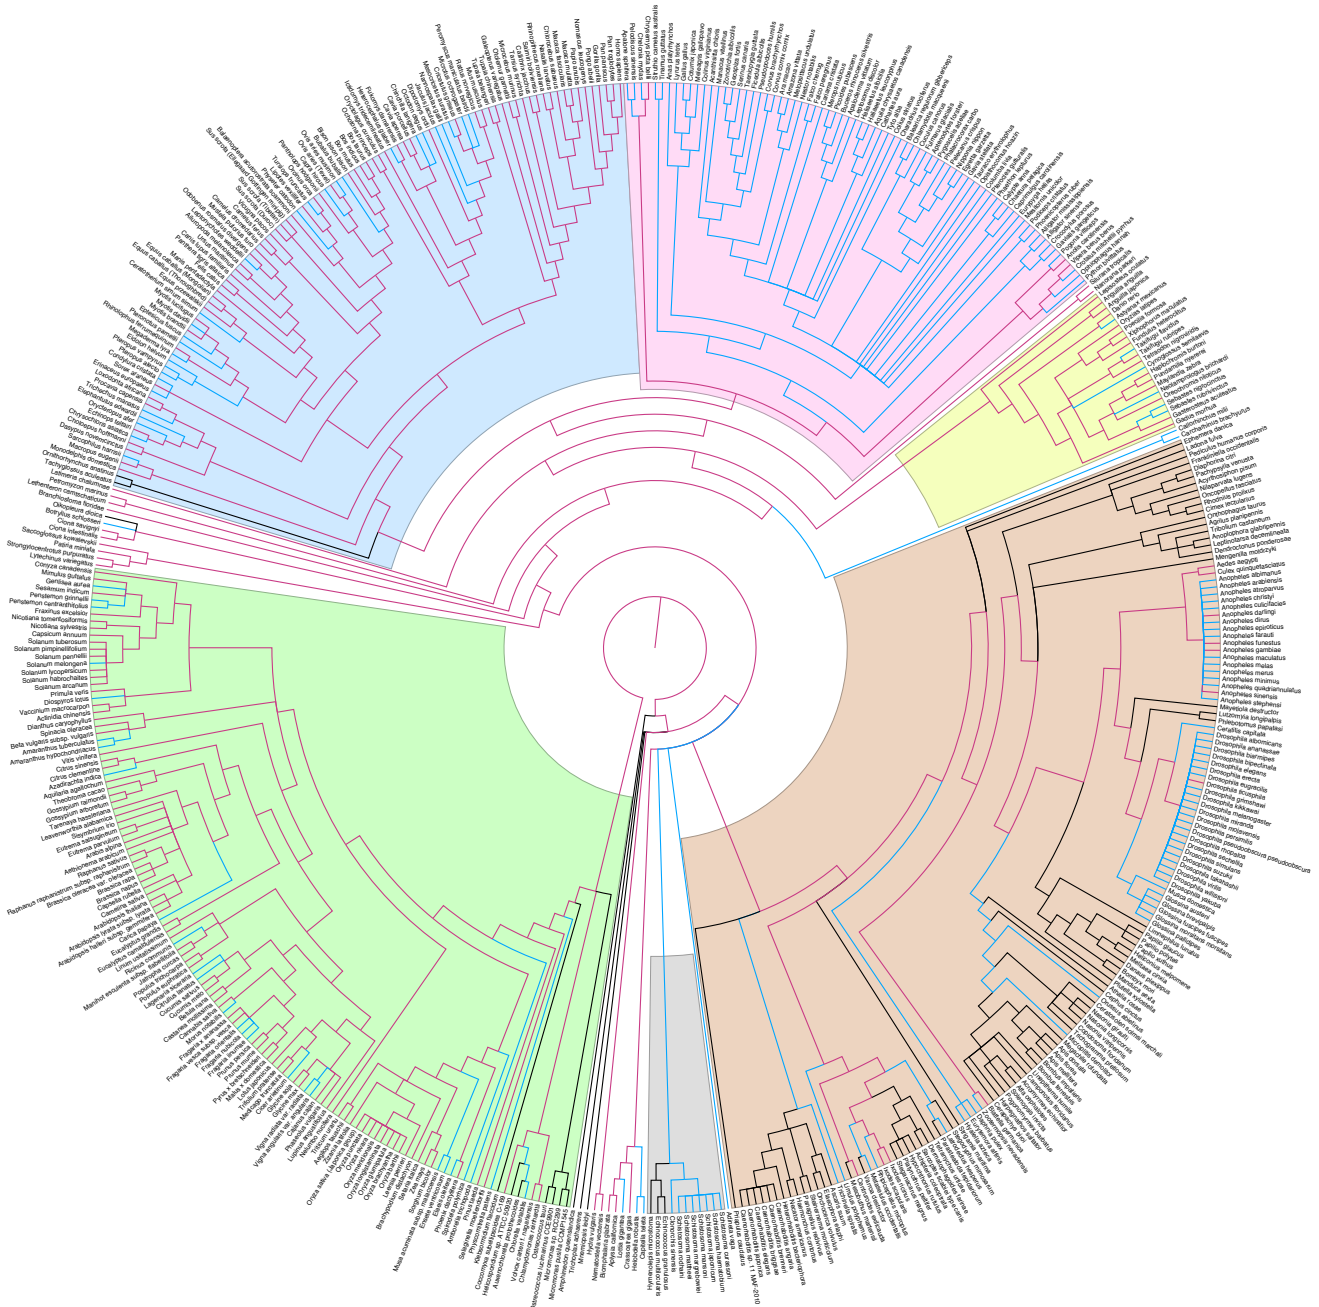

Figure 5: **Active versus extinct L1s:** The inferred eukaryotic tree of life with branches coloured to indicate the presence of active or ORF2-intact L1s (magenta) versus extinct L1s (blue). Species with complete absence of L1 elements are unchanged (i.e. black), as in Fig. 1. Since we can only observe the L1 status (active/extinct) at the tree tips, interior branches were coloured based on the most parsimonious explanation being that a loss-of-function is more likely than a gain.



### 3.2.4 Table 8: Active proportion of full-length L1 elements

Table 8: **Percentage of L1s active in the genome:** 206 species contain potentially active ORF2-intact L1s (67 mammals, 47 non-mammalian animals, 92 plants). For each species, we calculated the proportion of full-length (or near full-length) L1s that are active. The L1s had to be long enough to contain both ORFs. A range of different cut-off lengths were tested (e.g. 3.8 - 4.5kb at 100bp intervals), and the active/total percentage (column 4) was calculated each time, as well as the average and standard deviation. This, along with the L1 length distributions, helped determine the best cut-off length for each species (e.g. 4.5kb for most mammals, reduced to 3.8 - 4kb for some non-mammals and plants). The percentages did not change significantly regardless of the cut-off used. These sequences are labelled ‘near full-length’ because they may not have complete 5’ and 3’ ends. Species where the TBLASTN analysis showed active L1s but the LASTZ analysis did not (e.g. *Macropus eugenii*) are marked as ‘TBLASTN only’ and do not have a percentage (since 0 intact ORF2 were found in the genome).

| Species                                            | # L1s (near full-length) | # active L1s | # active L1s/<br># total L1s (%) |
|----------------------------------------------------|--------------------------|--------------|----------------------------------|
| <b>MAMMALIAN SPECIES</b>                           |                          |              |                                  |
| <i>Monodelphis domestica</i>                       | 15714                    | 1540         | 9.80018                          |
| <i>Macropus eugenii</i>                            | 572                      | TBLASTN only | -                                |
| <i>Dasypus novemcinctus</i>                        | 13067                    | 69           | 0.528048                         |
| <i>Choloepus hoffmanni</i>                         | 9584                     | 13           | 0.135643                         |
| <i>Echinops telfairi</i>                           | 1325                     | TBLASTN only | -                                |
| <i>Procavia capensis</i>                           | 3762                     | 8            | 0.212653                         |
| <i>Loxodonta africana</i>                          | 22244                    | 538          | 2.41863                          |
| <i>Sorex araneus</i>                               | 1722                     | TBLASTN only | -                                |
| <i>Rhinolophus ferrumequinum</i>                   | 1073                     | TBLASTN only | -                                |
| <i>Myotis brandtii</i>                             | 1659                     | 362          | 21.8204                          |
| <i>Myotis lucifugus</i>                            | 3185                     | 120          | 3.76766                          |
| <i>Equus przewalskii</i>                           | 7812                     | 60           | 0.768049                         |
| <i>Equus caballus</i><br>(Thoroughbred)            | 10921                    | 288          | 2.63712                          |
| <i>Equus caballus</i><br>(Mongolian)               | 7078                     | TBLASTN only | -                                |
| <i>Manis pentadactyla</i>                          | 5837                     | 37           | 0.633887                         |
| <i>Felis catus</i>                                 | 6162                     | 2            | 0.032457                         |
| <i>Panthera tigris altaica</i>                     | 5737                     | 582          | 10.1447                          |
| <i>Canis lupus familiaris</i>                      | 7772                     | 518          | 6.66495                          |
| <i>Ursus maritimus</i>                             | 5253                     | 869          | 16.5429                          |
| <i>Ailuropoda melanoleuca</i>                      | 4411                     | 1307         | 29.6305                          |
| <i>Odobenus rosmarus divergens</i>                 | 4752                     | 1            | 0.0210438                        |
| <i>Mustela putorius furo</i>                       | 5134                     | TBLASTN only | -                                |
| <i>Camelus dromedarius</i>                         | 2273                     | 411          | 18.0818                          |
| <i>Camelus ferus</i>                               | 2187                     | 27           | 1.23457                          |
| <i>Vicugna pacos</i>                               | 1696                     | TBLASTN only | -                                |
| <i>Sus scrofa</i> (Duroc)                          | 5596                     | 251          | 4.48535                          |
| <i>Sus scrofa</i> (Tibetan)                        | 4773                     | 322          | 6.74628                          |
| <i>Sus scrofa</i> (Ellegaard<br>Gottingen minipig) | 4779                     | 110          | 2.30174                          |
| <i>Balaenoptera acutorostrata scammoni</i>         | 8012                     | 5006         | 62.4813                          |
| <i>Lipotes vexillifer</i>                          | 23066                    | 1191         | 5.16344                          |
| <i>Orcinus orca</i>                                | 9293                     | 1            | 0.01076                          |

| Species                                | # L1s (near full-length) | # active L1s | # active L1s/<br># total L1s (%) |
|----------------------------------------|--------------------------|--------------|----------------------------------|
| <i>Pantholops hodgsonii</i>            | 2493                     | 1109         | 44.4846                          |
| <i>Ovis aries</i> (Texel)              | 3117                     | 1042         | 33.4296                          |
| <i>Bison bison bison</i>               | 2149                     | 3            | 0.1396                           |
| <i>Bos mutus</i>                       | 2145                     | 174          | 8.11189                          |
| <i>Bos indicus</i>                     | 3480                     | 259          | 7.44253                          |
| <i>Bos taurus</i>                      | 3649                     | 90           | 2.46643                          |
| <i>Ochotona princeps</i>               | 352                      | TBLASTN only | -                                |
| <i>Oryctolagus cuniculus</i>           | 6001                     | 280          | 4.66589                          |
| <i>Ictidomys tridecemlineatus</i>      | 3155                     | TBLASTN only | -                                |
| <i>Fukomys damarensis</i>              | 8423                     | 461          | 5.47311                          |
| <i>Cavia aperea</i>                    | 2816                     | 42           | 1.49148                          |
| <i>Cavia porcellus</i>                 | 14285                    | 651          | 4.55723                          |
| <i>Dipodomys ordii</i>                 | 1162                     | 41           | 3.5284                           |
| <i>Cricetulus griseus</i>              | 3416                     | 21           | 0.614754                         |
| <i>Rattus norvegicus</i>               | 10678                    | 1092         | 10.2266                          |
| <i>Mus musculus</i>                    | 18280                    | 4143         | 22.6641                          |
| <i>Tupaia belangeri</i>                | 802                      | 4            | 0.498753                         |
| <i>Tupaia chinensis</i>                | 3262                     | 232          | 7.1122                           |
| <i>Galeopterus variegatus</i>          | 7565                     | 2            | 0.0264375                        |
| <i>Otolemur garnettii</i>              | 4030                     | TBLASTN only | -                                |
| <i>Microcebus murinus</i>              | 1100                     | 33           | 3                                |
| <i>Tarsius syrichta</i>                | 16086                    | 2            | 0.0124332                        |
| <i>Callithrix jacchus</i>              | 9148                     | 18           | 0.196764                         |
| <i>Saimiri boliviensis boliviensis</i> | 6163                     | TBLASTN only | -                                |
| <i>Rhinopithecus roxellana</i>         | 11115                    | 2954         | 26.5767                          |
| <i>Nasalis larvatus</i>                | 4217                     | 1            | 0.0237135                        |
| <i>Chlorocebus sabaesus</i>            | 7864                     | 13           | 0.16531                          |
| <i>Macaca fascicularis</i>             | 9655                     | 89           | 0.921802                         |
| <i>Macaca mulatta</i>                  | 3947                     | 128          | 3.24297                          |
| <i>Papio anubis</i>                    | 8205                     | 82           | 0.999391                         |
| <i>Nomascus leucogenys</i>             | 9990                     | 178          | 1.78178                          |
| <i>Pongo abelii</i>                    | 9466                     | 103          | 1.0881                           |
| <i>Gorilla gorilla gorilla</i>         | 6802                     | 8            | 0.117612                         |
| <i>Pan paniscus</i>                    | 11833                    | 4            | 0.0338038                        |
| <i>Pan troglodytes</i>                 | 10521                    | 115          | 1.09305                          |
| <i>Homo sapiens</i>                    | 13224                    | 480          | 3.62976                          |
| <b>NON-MAMMALIAN ANIMAL SPECIES</b>    |                          |              |                                  |
| <i>Chrysemys picta bellii</i>          | 141                      | 1            | 0.70922                          |
| <i>Anolis carolinensis</i>             | 694                      | 187          | 26.9452                          |
| <i>Vipera berus berus</i>              | 146                      | 2            | 1.36986                          |
| <i>Nanorana parkeri</i>                | 487                      | 11           | 2.25873                          |
| <i>Xenopus tropicalis</i>              | 580                      | 198          | 34.1379                          |
| <i>Lepisosteus oculatus</i>            | 16                       | 2            | 12.5                             |
| <i>Anguilla anguilla</i>               | 68                       | 3            | 4.41176                          |
| <i>Anguilla japonica</i>               | 100                      | 4            | 4                                |
| <i>Danio rerio</i>                     | 590                      | 268          | 45.4237                          |
| <i>Oryzias latipes</i>                 | 45                       | 2            | 4.44444                          |
| <i>Poecilia formosa</i>                | 41                       | 5            | 12.1951                          |

| Species                               | # L1s (near full-length) | # active L1s | # active L1s/<br># total L1s (%) |
|---------------------------------------|--------------------------|--------------|----------------------------------|
| <i>Xiphophorus maculatus</i>          | 18                       | 3            | 16.6667                          |
| <i>Fundulus heteroclitus</i>          | 47                       | 7            | 14.8936                          |
| <i>Takifugu rubripes</i>              | 33                       | TBLASTN only | -                                |
| <i>Tetraodon nigroviridis</i>         | 15                       | TBLASTN only | -                                |
| <i>Haplochromis burtoni</i>           | 48                       | 3            | 6.25                             |
| <i>Pundamilia nyererei</i>            | 42                       | 1            | 2.38095                          |
| <i>Maylandia zebra</i>                | 45                       | 3            | 6.66667                          |
| <i>Oreochromis niloticus</i>          | 98                       | 6            | 6.12245                          |
| <i>Gasterosteus aculeatus</i>         | 24                       | 8            | 33.3333                          |
| <i>Gadus morhua</i>                   | 30                       | 2            | 6.66667                          |
| <i>Aedes aegypti</i>                  | 519                      | 184          | 35.4528                          |
| <i>Culex quinquefasciatus</i>         | 128                      | 61           | 47.6562                          |
| <i>Anopheles darlingi</i>             | 1                        | 1            | 100                              |
| <i>Anopheles funestus</i>             | 3                        | 2            | 66.6667                          |
| <i>Anopheles gambiae</i>              | 10                       | 6            | 60                               |
| <i>Anopheles sinensis</i>             | 7                        | 1            | 14.2857                          |
| <i>Drosophila ficusphila</i>          | 8                        | 2            | 25                               |
| <i>Blattella germanica</i>            | 52                       | 4            | 7.69231                          |
| <i>Ixodes ricinus</i>                 | 27                       | 4            | 14.8148                          |
| <i>Ixodes scapularis</i>              | 88                       | TBLASTN only | -                                |
| <i>Centruroides exilicauda</i>        | 5                        | 1            | 20                               |
| <i>Crassostrea gigas</i>              | 97                       | 30           | 30.9278                          |
| <i>Aplysia californica</i>            | 10                       | 1            | 10                               |
| <i>Biomphalaria glabrata</i>          | 4                        | TBLASTN only | -                                |
| <i>Nematostella vectensis</i>         | 8                        | 1            | 12.5                             |
| <i>Hydra vulgaris</i>                 | 83                       | 3            | 3.61446                          |
| <i>Lytechinus variegatus</i>          | 25                       | TBLASTN only | -                                |
| <i>Strongylocentrotus purpuratus</i>  | 149                      | 19           | 12.7517                          |
| <i>Patiria miniata</i>                | 8                        | 2            | 25                               |
| <i>Saccoglossus kowalevskii</i>       | 122                      | 6            | 4.91803                          |
| <i>Ciona intestinalis</i>             | 2                        | TBLASTN only | -                                |
| <i>Ciona savignyi</i>                 | 311                      | 42           | 13.5048                          |
| <i>Branchiostoma floridae</i>         | 48                       | 16           | 33.3333                          |
| <i>Lethenteron camtschaticum</i>      | 38                       | 4            | 10.5263                          |
| <i>Petromyzon marinus</i>             | 46                       | 1            | 2.17391                          |
| <i>Latimeria chalumnae</i>            | 921                      | 17           | 1.84582                          |
| <b>PLANT SPECIES</b>                  |                          |              |                                  |
| <i>Chlamydomonas reinhardtii</i>      | 9                        | 4            | 44.4444                          |
| <i>Volvox carteri f. nagariensis</i>  | 11                       | 6            | 54.5455                          |
| <i>Coccomyxa subellipsoidea C-169</i> | 15                       | 15           | 100                              |
| <i>Selaginella moellendorffii</i>     | 25                       | 10           | 40                               |
| <i>Pinus taeda</i>                    | 324                      | 5            | 1.54321                          |
| <i>Phoenix dactylifera</i>            | 307                      | 22           | 7.16612                          |
| <i>Sorghum bicolor</i>                | 358                      | 61           | 17.0391                          |
| <i>Zea mays</i>                       | 744                      | 165          | 22.1774                          |

| Species                                       | # L1s (near full-length) | # active L1s | # active L1s/<br># total L1s (%) |
|-----------------------------------------------|--------------------------|--------------|----------------------------------|
| <i>Setaria italica</i>                        | 289                      | 34           | 11.7647                          |
| <i>Brachypodium distachyon</i>                | 165                      | 3            | 1.81818                          |
| <i>Leersia perrieri</i>                       | 106                      | 2            | 1.88679                          |
| <i>Oryza barthii</i>                          | 130                      | 5            | 3.84615                          |
| <i>Oryza brachyantha</i>                      | 39                       | 2            | 5.12821                          |
| <i>Oryza glumipatula</i>                      | 95                       | 2            | 2.10526                          |
| <i>Oryza longistaminata</i>                   | 118                      | 26           | 22.0339                          |
| <i>Oryza meridionalis</i>                     | 77                       | 2            | 2.5974                           |
| <i>Oryza nivara</i>                           | 128                      | 4            | 3.125                            |
| <i>Oryza punctata</i>                         | 93                       | 1            | 1.07527                          |
| <i>Oryza sativa Japonica Group</i>            | 176                      | 14           | 7.95455                          |
| <i>Zizania latifolia</i>                      | 102                      | 2            | 1.96078                          |
| <i>Aegilops tauschii</i>                      | 1579                     | 38           | 2.40659                          |
| <i>Triticum urartu</i>                        | 2040                     | 86           | 4.21569                          |
| <i>Nelumbo nucifera</i>                       | 905                      | 1            | 0.11050                          |
| <i>Lupinus angustifolius</i>                  | 271                      | 2            | 0.738007                         |
| <i>Phaseolus vulgaris</i>                     | 295                      | 17           | 5.76271                          |
| <i>Cajanus cajan</i>                          | 52                       | 1            | 1.92308                          |
| <i>Glycine max</i>                            | 523                      | 81           | 15.4876                          |
| <i>Glycine soja</i>                           | 494                      | 65           | 13.1579                          |
| <i>Medicago truncatula</i>                    | 95                       | 24           | 25.2632                          |
| <i>Trifolium pratense</i>                     | 49                       | 12           | 24.4898                          |
| <i>Lotus japonicus</i>                        | 10                       | TBLASTN      | -                                |
| <i>Malus x domestica</i>                      | 131                      | 20           | 15.2672                          |
| <i>Pyrus x bretschneideri</i>                 | 176                      | 13           | 7.38636                          |
| <i>Prunus mume</i>                            | 49                       | 5            | 10.2041                          |
| <i>Prunus persica</i>                         | 47                       | 8            | 17.0213                          |
| <i>Fragaria vesca subsp. vesca</i>            | 46                       | 3            | 6.52174                          |
| <i>Fragaria x ananassa</i>                    | 13                       | 2            | 15.3846                          |
| <i>Cannabis sativa</i>                        | 93                       | 20           | 21.5054                          |
| <i>Castanea mollissima</i>                    | 381                      | 3            | 0.787402                         |
| <i>Betula nana</i>                            | 96                       | 2            | 2.08333                          |
| <i>Cucumis melo</i>                           | 66                       | 2            | 3.03030                          |
| <i>Cucumis sativus</i>                        | 11                       | 3            | 27.27273                         |
| <i>Populus euphratica</i>                     | 139                      | 52           | 37.4101                          |
| <i>Populus trichocarpa</i>                    | 104                      | 17           | 16.3462                          |
| <i>Jatropha curcas</i>                        | 73                       | 5            | 6.84932                          |
| <i>Manihot esculenta subsp. flabellifolia</i> | 35                       | 2            | 5.71429                          |
| <i>Linum usitatissimum</i>                    | 58                       | 1            | 1.72414                          |
| <i>Eucalyptus camaldulensis</i>               | 256                      | 11           | 4.29688                          |
| <i>Eucalyptus grandis</i>                     | 512                      | 49           | 9.57031                          |
| <i>Arabidopsis halleri subsp. gemmifera</i>   | 267                      | 50           | 18.7266                          |
| <i>Arabidopsis lyrata subsp. lyrata</i>       | 366                      | 103          | 28.1421                          |
| <i>Arabidopsis thaliana</i>                   | 99                       | 20           | 20.202                           |
| <i>Camelina sativa</i>                        | 1175                     | 106          | 9.02128                          |

| Species                                                    | # L1s (near full-length) | # active L1s | # active L1s/<br># total L1s (%) |
|------------------------------------------------------------|--------------------------|--------------|----------------------------------|
| <i>Capsella rubella</i>                                    | 147                      | 53           | 36.0544                          |
| <i>Brassica napus</i>                                      | 1929                     | 565          | 29.2898                          |
| <i>Brassica oleracea</i> var.<br><i>oleracea</i>           | 831                      | 84           | 10.1083                          |
| <i>Brassica rapa</i>                                       | 543                      | 228          | 41.989                           |
| <i>Raphanus raphanistrum</i><br>subsp. <i>raphanistrum</i> | 535                      | 182          | 34.0187                          |
| <i>Raphanus sativus</i>                                    | 866                      | 287          | 33.1409                          |
| <i>Aethionema arabicum</i>                                 | 361                      | 51           | 14.1274                          |
| <i>Arabis alpina</i>                                       | 689                      | 53           | 7.69231                          |
| <i>Eutrema parvulum</i>                                    | 129                      | 2            | 1.55039                          |
| <i>Eutrema salsugineum</i>                                 | 480                      | 52           | 10.8333                          |
| <i>Sisymbrium irio</i>                                     | 357                      | 16           | 4.48179                          |
| <i>Leavenworthia alabamica</i>                             | 103                      | 18           | 17.4757                          |
| <i>Tarenaya hassleriana</i>                                | 45                       | 8            | 17.7778                          |
| <i>Gossypium arboreum</i>                                  | 341                      | 1            | 0.293255                         |
| <i>Gossypium raimondii</i>                                 | 152                      | 2            | 1.31579                          |
| <i>Theobroma cacao</i>                                     | 115                      | 16           | 13.913                           |
| <i>Aquilaria agallochum</i>                                | 134                      | 2            | 1.49254                          |
| <i>Citrus clementina</i>                                   | 144                      | 16           | 11.1111                          |
| <i>Citrus sinensis</i>                                     | 131                      | 14           | 10.687                           |
| <i>Vitis vinifera</i>                                      | 1134                     | 111          | 9.78836                          |
| <i>Beta vulgaris</i> subsp.<br><i>vulgaris</i>             | 671                      | 187          | 27.8689                          |
| <i>Spinacia oleracea</i>                                   | 227                      | 33           | 14.5374                          |
| <i>Dianthus caryophyllus</i>                               | 63                       | 18           | 28.5714                          |
| <i>Actinidia chinensis</i>                                 | 94                       | 6            | 6.38298                          |
| <i>Vaccinium macrocarpon</i>                               | 13                       | 1            | 7.69231                          |
| <i>Primula veris</i>                                       | 21                       | 1            | 4.7619                           |
| <i>Solanum arcanum</i>                                     | 420                      | 33           | 7.85714                          |
| <i>Solanum habrochaites</i>                                | 422                      | 12           | 2.8436                           |
| <i>Solanum lycopersicum</i>                                | 467                      | 18           | 3.85439                          |
| <i>Solanum pennellii</i>                                   | 443                      | 3            | 0.677201                         |
| <i>Solanum pimpinellifolium</i>                            | 364                      | 11           | 3.02198                          |
| <i>Solanum tuberosum</i>                                   | 470                      | 20           | 4.25532                          |
| <i>Capsicum annuum</i>                                     | 1006                     | 1            | 0.0994036                        |
| <i>Nicotiana sylvestris</i>                                | 1124                     | 6            | 0.533808                         |
| <i>Nicotiana</i><br><i>tomentosiformis</i>                 | 1055                     | 1            | 0.0947867                        |
| <i>Fraxinus excelsior</i>                                  | 157                      | 12           | 7.64331                          |
| <i>Sesamum indicum</i>                                     | 60                       | 1            | 1.66667                          |
| <i>Mimulus guttatus</i>                                    | 114                      | 38           | 33.3333                          |
| <i>Conyza canadensis</i>                                   | 30                       | 4            | 13.3333                          |

### 3.3 Mammalian species typically have a dominant active cluster

#### 3.3.1 Table 9: Master versus multiple lineage models

Table 9: **Mammalian L1 lineages:** Shows the predicted lineage model for L1\* mammalian species, based on the clustering and dendrogram results. A master lineage is characterised by a single dominant cluster which contains the majority of the active L1s in the genome with high pairwise identity to each other. The L1s from each mammalian species were initially clustered at 70% identity - the following results show the number of active L1s in the dominant cluster(s) at this percent identity. 31 mammalian species seem to adhere to the master lineage model. However, there are 12 species which have several distinct active clusters - indicative of a ‘multiple lineage’ model. Finally, some species do not have enough active L1s to discern the model type (listed below as ‘low active copy number species’).

| Species                                  | Dominant active cluster(s) | Active proportion (# active L1s/ # L1s in cluster) |
|------------------------------------------|----------------------------|----------------------------------------------------|
| <b>MASTER lineage species</b>            |                            |                                                    |
| <i>Monodelphis domestica</i>             | cluster_1                  | 1292/3752                                          |
| <i>Dasyopus novemcinctus</i>             | cluster_0                  | 68/5203                                            |
| <i>Loxodonta africana</i>                | cluster_9                  | 439/3670                                           |
| <i>Canis lupus</i>                       | cluster_4                  | 465/2684                                           |
| <i>Ursus maritimus</i>                   | cluster_2                  | 847/1532                                           |
| <i>Ailuropoda melanoleuca</i>            | cluster_0                  | 1166/1224                                          |
| <i>Camelus dromedarius</i>               | cluster_4                  | 377/530                                            |
| <i>Sus scrofa</i> (Duroc)                | cluster_13                 | 250/1458                                           |
| <i>Sus scrofa</i> (Tibetan)              | cluster_14                 | 157/341                                            |
| <i>Sus scrofa</i> (minipig)              | cluster_327                | 92/134                                             |
| <i>Balaenoptera acutorostrata</i>        | cluster_8                  | 1932/2171                                          |
| <i>Lipotes vexillifer</i>                | cluster_0                  | 581/10452                                          |
| <i>Pantholops hodgsonii</i>              | cluster_6                  | 1094/1438                                          |
| <i>Ovis aries</i> (Texel)                | cluster_1                  | 990/1629                                           |
| <i>Bos mutus</i>                         | cluster_441                | 58/76                                              |
| <i>Bos indicus</i>                       | cluster_0                  | 234/1960                                           |
| <i>Bos taurus</i>                        | cluster_2                  | 83/1953                                            |
| <i>Fukomys damarensis</i>                | cluster_0                  | 447/1366                                           |
| <i>Rattus norvegicus</i>                 | cluster_0                  | 664/4209                                           |
| <i>Mus musculus</i>                      | cluster_0                  | 2388/4712                                          |
| <i>Microcebus murinus</i>                | cluster_1                  | 33/775                                             |
| <i>Callithrix jacchus</i>                | cluster_0                  | 14/1853                                            |
| <i>Rhinopithecus roxellana</i>           | cluster_4                  | 1570/2602                                          |
| <i>Chlorocebus sabaues</i>               | cluster_0                  | 12/1878                                            |
| <i>Macaca fascicularis</i>               | cluster_0                  | 72/3009                                            |
| <i>Macaca mulatta</i>                    | cluster_91                 | 94/276                                             |
| <i>Papio anubis</i>                      | cluster_5                  | 61/1835                                            |
| <i>Nomascus leucogenys</i>               | cluster_2                  | 117/3187                                           |
| <i>Pongo abelii</i>                      | cluster_3                  | 59/514                                             |
| <i>Pan troglodytes</i>                   | cluster_7                  | 75/3982                                            |
| <i>Homo sapiens</i>                      | cluster_0                  | 409/2725                                           |
| <b>Possible MULTIPLE lineage species</b> |                            |                                                    |
| <i>Myotis brandtii</i>                   | cluster_1                  | 11/128                                             |
|                                          | cluster_140                | 250/339                                            |
|                                          | cluster_39                 | 97/196                                             |

| Species                               | Dominant active cluster(s)                                     | Active proportion (# active L1s/ # L1s in cluster)   |
|---------------------------------------|----------------------------------------------------------------|------------------------------------------------------|
| <i>Myotis lucifugus</i>               | cluster_197<br>cluster_2<br>cluster_328<br>cluster_7           | 9/83<br>57/836<br>37/218<br>15/250                   |
| <i>Equus przewalskii</i>              | cluster_13<br>cluster_189<br>cluster_290                       | 57/289<br>1/8<br>2/8                                 |
| <i>Equus caballus</i> (Thoroughbred)  | cluster_1<br>cluster_142<br>cluster_55                         | 41/420<br>200/788<br>46/1436                         |
| <i>Manis pentadactyla</i>             | cluster_0<br>cluster_49                                        | 27/151<br>10/655                                     |
| <i>Panthera tigris</i>                | cluster_1<br>cluster_1745<br>cluster_628<br>cluster_78         | 221/460<br>131/236<br>24/29<br>195/275               |
| <i>Oryctolagus cuniculus</i>          | cluster_0<br>cluster_1<br>cluster_424                          | 98/1685<br>157/1807<br>14/168                        |
| <i>Cavia aperea</i>                   | cluster_0<br>cluster_8                                         | 16/421<br>26/1609                                    |
| <i>Cavia porcellus</i>                | cluster_0<br>cluster_1<br>cluster_18<br>cluster_2<br>cluster_3 | 214/1396<br>179/2194<br>31/597<br>222/2350<br>3/3204 |
| <i>Dipodomys ordii</i>                | cluster_0<br>cluster_1<br>cluster_2                            | 27/536<br>11/229<br>3/282                            |
| <i>Cricetulus griseus</i>             | cluster_0<br>cluster_74                                        | 20/331<br>1/22                                       |
| <i>Tupaia chinensis</i>               | cluster_129<br>cluster_1391<br>cluster_9                       | 149/196<br>40/40<br>38/84                            |
| <b>LOW ACTIVE COPY NUMBER species</b> |                                                                |                                                      |
| <i>Choloepus hoffmannis</i>           | -                                                              | -                                                    |
| <i>Procapra capensis</i>              | -                                                              | -                                                    |
| <i>Felis catus</i>                    | -                                                              | -                                                    |
| <i>Odobenus rosmarus</i>              | -                                                              | -                                                    |
| <i>Camelus ferus</i>                  | -                                                              | -                                                    |
| <i>Orcinus orca</i>                   | -                                                              | -                                                    |
| <i>Bison bison</i>                    | -                                                              | -                                                    |
| <i>Tupaia belangeri</i>               | -                                                              | -                                                    |
| <i>Galeopterus variegatus</i>         | -                                                              | -                                                    |
| <i>Tarsius syrichta</i>               | -                                                              | -                                                    |
| <i>Nasalis larvatus</i>               | -                                                              | -                                                    |
| <i>Gorilla gorilla</i>                | -                                                              | -                                                    |
| <i>Pan paniscus</i>                   | -                                                              | -                                                    |

## 3.4 Reverse transcriptase domain reveals distinct L1 groups

### 3.4.1 Table 10: Plant-specific domains

Table 10: **Reverse transcriptase domains found in plants:** L1 ORF2p are known to encode an apurinic endonuclease and reverse transcriptase. RVT\_1 (pfam.xfam.org) is the typical ORF2p reverse transcriptase, and it was found in every single ORF2-intact species. However, most plant species had an additional reverse transcriptase RVT\_3, often accompanied by a ribonuclease H domain. Sometimes RVT\_3 was included in the ORF2 after RVT\_1; other times it was found in a separate, third ORF. The following table shows the variety of reverse transcriptase-like domains found in plant L1s (not restricted to just the ORF2 region).

| Plant species                            | Reverse transcriptase | Ribonuclease |
|------------------------------------------|-----------------------|--------------|
| <i>Chlamydomonas reinhardtii</i>         | RVT_1                 | -            |
| <i>Volvox carteri f. nagariensis</i>     | RVT_1                 | -            |
| <i>Chlorella variabilis</i>              | RVT_1                 | -            |
| <i>Coccomyxa subellipsoidea C-169</i>    | RVT_1                 | -            |
| <i>Physcomitrella patens</i>             | RVT_1                 | -            |
| <i>Selaginella moellendorffii</i>        | RVT_1                 | RNH          |
| <i>Pinus taeda</i>                       | RVT_1, RVT_3          | RNH          |
| <i>Amborella trichopoda</i>              | RVT_1, RVT_3          | RNH          |
| <i>Spirodela polyrhiza</i>               | RVT_1, RVT_3          | RNH          |
| <i>Phoenix dactylifera</i>               | RVT_1, RVT_3          | RNH          |
| <i>Elaeis oleifera</i>                   | RVT_1, RVT_3          | -            |
| <i>Ensete ventricosum</i>                | -                     | -            |
| <i>Musa acuminata subsp. malaccensis</i> | RVT_1                 | -            |
| <i>Sorghum bicolor</i>                   | RVT_1, RVT_3          | RNH          |
| <i>Zea mays</i>                          | RVT_1, RVT_3          | RNH          |
| <i>Setaria italica</i>                   | RVT_1, RVT_3          | RNH          |
| <i>Brachypodium distachyon</i>           | RVT_1, RVT_3          | RNH          |
| <i>Leersia perrieri</i>                  | RVT_1, RVT_3          | RNH          |
| <i>Oryza barthii</i>                     | RVT_1, RVT_3          | RNH          |
| <i>Oryza brachyantha</i>                 | RVT_1, RVT_3          | RNH          |
| <i>Oryza glumipatula</i>                 | RVT_1, RVT_3          | RNH          |
| <i>Oryza longistaminata</i>              | RVT_1, RVT_3          | RNH          |
| <i>Oryza meridionalis</i>                | RVT_1, RVT_3          | RNH          |
| <i>Oryza nivara</i>                      | RVT_1, RVT_3          | RNH          |
| <i>Oryza punctata</i>                    | RVT_1, RVT_3          | RNH          |
| <i>Oryza sativa Japonica Group</i>       | RVT_1, RVT_3          | -            |
| <i>Zizania latifolia</i>                 | RVT_1                 | -            |
| <i>Aegilops tauschii</i>                 | RVT_1, RVT_3          | RNH          |
| <i>Triticum urartu</i>                   | RVT_1, RVT_3          | RNH          |
| <i>Nelumbo nucifera</i>                  | RVT_1, RVT_3          | RNH          |
| <i>Lupinus angustifolius</i>             | RVT_1, RVT_3          | RNH          |
| <i>Phaseolus vulgaris</i>                | RVT_1, RVT_3          | RNH          |
| <i>Cajanus cajan</i>                     | RVT_1, RVT_3          | RNH          |
| <i>Vigna angularis var. angularis</i>    | -                     | -            |
| <i>Vigna radiata var. radiata</i>        | -                     | -            |
| <i>Glycine max</i>                       | RVT_1, RVT_3          | RNH          |
| <i>Glycine soja</i>                      | RVT_1, RVT_3          | RNH          |
| <i>Cicer arietinum</i>                   | -                     | -            |
| <i>Medicago truncatula</i>               | RVT_1, RVT_3          | RNH          |
| <i>Trifolium pratense</i>                | RVT_1, RVT_3          | RNH          |



| <b>Plant species</b>                             | <b>Reverse transcriptase</b> | <b>Ribonuclease</b> |
|--------------------------------------------------|------------------------------|---------------------|
| <i>Lotus japonicus</i>                           | RVT_1, RVT_3                 | RNH                 |
| <i>Malus x domestica</i>                         | RVT_1, RVT_3                 | RNH                 |
| <i>Pyrus x bretschneideri</i>                    | RVT_1, RVT_3                 | RNH                 |
| <i>Prunus mume</i>                               | RVT_1, RVT_3                 | RNH                 |
| <i>Prunus persica</i>                            | RVT_1, RVT_3                 | RNH                 |
| <i>Fragaria iinumae</i>                          | RVT_1, RVT_3                 | RNH                 |
| <i>Fragaria nubicola</i>                         | RVT_1, RVT_3                 | RNH                 |
| <i>Fragaria orientalis</i>                       | RVT_1, RVT_3                 | RNH                 |
| <i>Fragaria vesca subsp. vesca</i>               | RVT_1, RVT_3                 | RNH                 |
| <i>Fragaria x ananassa</i>                       | RVT_1, RVT_3                 | RNH                 |
| <i>Morus notabilis</i>                           | RVT_1, RVT_3                 | -                   |
| <i>Cannabis sativa</i>                           | RVT_1, RVT_3                 | RNH                 |
| <i>Castanea mollissima</i>                       | RVT_1, RVT_3                 | RNH                 |
| <i>Betula nana</i>                               | RVT_1, RVT_3                 | -                   |
| <i>Cucumis melo</i>                              | RVT_1                        | -                   |
| <i>Cucumis sativus</i>                           | RVT_1                        | -                   |
| <i>Citrullus lanatus</i>                         | RVT_1                        | -                   |
| <i>Lagenaria siceraria</i>                       | RVT_1                        | -                   |
| <i>Populus euphratica</i>                        | RVT_1, RVT_3                 | RNH                 |
| <i>Populus trichocarpa</i>                       | RVT_1, RVT_3                 | RNH                 |
| <i>Jatropha curcas</i>                           | RVT_1, RVT_3                 | RNH                 |
| <i>Manihot esculenta subsp. flabellifolia</i>    | RVT_1, RVT_3                 | RNH                 |
| <i>Ricinus communis</i>                          | RVT_1                        | -                   |
| <i>Linum usitatissimum</i>                       | RVT_1                        | -                   |
| <i>Eucalyptus camaldulensis</i>                  | RVT_1, RVT_3                 | RNH                 |
| <i>Eucalyptus grandis</i>                        | RVT_1, RVT_3                 | RNH                 |
| <i>Carica papaya</i>                             | RVT_1                        | -                   |
| <i>Arabidopsis halleri subsp. gemmifera</i>      | RVT_1, RVT_3                 | RNH                 |
| <i>Arabidopsis lyrata subsp. lyrata</i>          | RVT_1, RVT_3                 | RNH                 |
| <i>Arabidopsis thaliana</i>                      | RVT_1, RVT_3                 | RNH                 |
| <i>Camelina sativa</i>                           | RVT_1, RVT_3                 | RNH                 |
| <i>Capsella rubella</i>                          | RVT_1, RVT_3                 | RNH                 |
| <i>Brassica napus</i>                            | RVT_1, RVT_3                 | RNH                 |
| <i>Brassica oleracea var. oleracea</i>           | RVT_1, RVT_3                 | RNH                 |
| <i>Brassica rapa</i>                             | RVT_1, RVT_3                 | RNH                 |
| <i>Raphanus raphanistrum subsp. raphanistrum</i> | RVT_1, RVT_3                 | RNH                 |
| <i>Raphanus sativus</i>                          | RVT_1, RVT_3                 | RNH                 |
| <i>Aethionema arabicum</i>                       | RVT_1, RVT_3                 | RNH                 |
| <i>Arabis alpina</i>                             | RVT_1, RVT_3                 | RNH                 |
| <i>Eutrema parvulum</i>                          | RVT_1, RVT_3                 | RNH                 |
| <i>Eutrema salsugineum</i>                       | RVT_1, RVT_3                 | RNH                 |
| <i>Sisymbrium irio</i>                           | RVT_1, RVT_3                 | RNH                 |
| <i>Leavenworthia alabamica</i>                   | RVT_1, RVT_3                 | RNH                 |
| <i>Tarenaya hassleriana</i>                      | RVT_1, RVT_3                 | -                   |
| <i>Gossypium arboreum</i>                        | RVT_1, RVT_3                 | -                   |
| <i>Gossypium raimondii</i>                       | RVT_1, RVT_3                 | -                   |
| <i>Theobroma cacao</i>                           | RVT_1, RVT_3                 | RNH                 |
| <i>Aquilaria agallochum</i>                      | RVT_1, RVT_3                 | RNH                 |

| Plant species                        | Reverse transcriptase | Ribonuclease |
|--------------------------------------|-----------------------|--------------|
| <i>Azadirachta indica</i>            | RVT_1, RVT_3          | -            |
| <i>Citrus clementina</i>             | RVT_1, RVT_3          | RNH          |
| <i>Citrus sinensis</i>               | RVT_1, RVT_3          | RNH          |
| <i>Vitis vinifera</i>                | RVT_1, RVT_3          | -            |
| <i>Amaranthus hypochondriacus</i>    | RVT_1, RVT_3          | -            |
| <i>Amaranthus tuberculatus</i>       | -                     | -            |
| <i>Beta vulgaris subsp. vulgaris</i> | RVT_1, RVT_3          | RNH          |
| <i>Spinacia oleracea</i>             | RVT_1, RVT_3          | RNH          |
| <i>Dianthus caryophyllus</i>         | RVT_1, RVT_3          | RNH          |
| <i>Actinidia chinensis</i>           | RVT_1, RVT_3          | -            |
| <i>Vaccinium macrocarpon</i>         | RVT_1, RVT_3          | -            |
| <i>Diospyros lotus</i>               | -                     | -            |
| <i>Primula veris</i>                 | RVT_1, RVT_3          | -            |
| <i>Solanum arcanum</i>               | RVT_1, RVT_3          | RNH          |
| <i>Solanum habrochaites</i>          | RVT_1, RVT_3          | RNH          |
| <i>Solanum lycopersicum</i>          | RVT_1, RVT_3          | RNH          |
| <i>Solanum melongena</i>             | RVT_1, RVT_3          | RNH          |
| <i>Solanum pennellii</i>             | RVT_1, RVT_3          | RNH          |
| <i>Solanum pimpinellifolium</i>      | RVT_1, RVT_3          | RNH          |
| <i>Solanum tuberosum</i>             | RVT_1, RVT_3          | RNH          |
| <i>Capsicum annuum</i>               | RVT_1, RVT_3          | RNH          |
| <i>Nicotiana sylvestris</i>          | RVT_1, RVT_3          | RNH          |
| <i>Nicotiana tomentosiformis</i>     | RVT_1, RVT_3          | RNH          |
| <i>Fraxinus excelsior</i>            | RVT_1, RVT_3          | -            |
| <i>Penstemon centranthifolius</i>    | -                     | -            |
| <i>Penstemon grinnellii</i>          | -                     | -            |
| <i>Sesamum indicum</i>               | RVT_1, RVT_3          | RNH          |
| <i>Genlisea aurea</i>                | RVT_1                 | -            |
| <i>Mimulus guttatus</i>              | RVT_1, RVT_3          | RNH          |
| <i>Conyza canadensis</i>             | RVT_1, RVT_3          | RNH          |

### 3.4.2 Figure 6: ORF2p associated domain network diagrams

The following figures show network graphs of known ORF2p domains (e.g. reverse transcriptase RVT\_1) and their strongly associated domains, for each designated order of taxa: Mammalia, Sauropsida, Amphibia, Neopterygii, Ecdysozoa, Other (e.g. 'primitive' organisms) and Viridiplantae. For every ORF2p in every L1 (in each group of species), the HMM top hit was ranked first (this was always RVT\_1) and other domains next to the top hit were ranked afterwards by decreasing score. This was used to generate a .csv file and visualise the corresponding network in Gephi. Nodes are the domain hits, and edges are weighted according to the strength of the association (i.e. how frequently they appear in that group of species). Note that edges have been rescaled to allow easy visualisation.

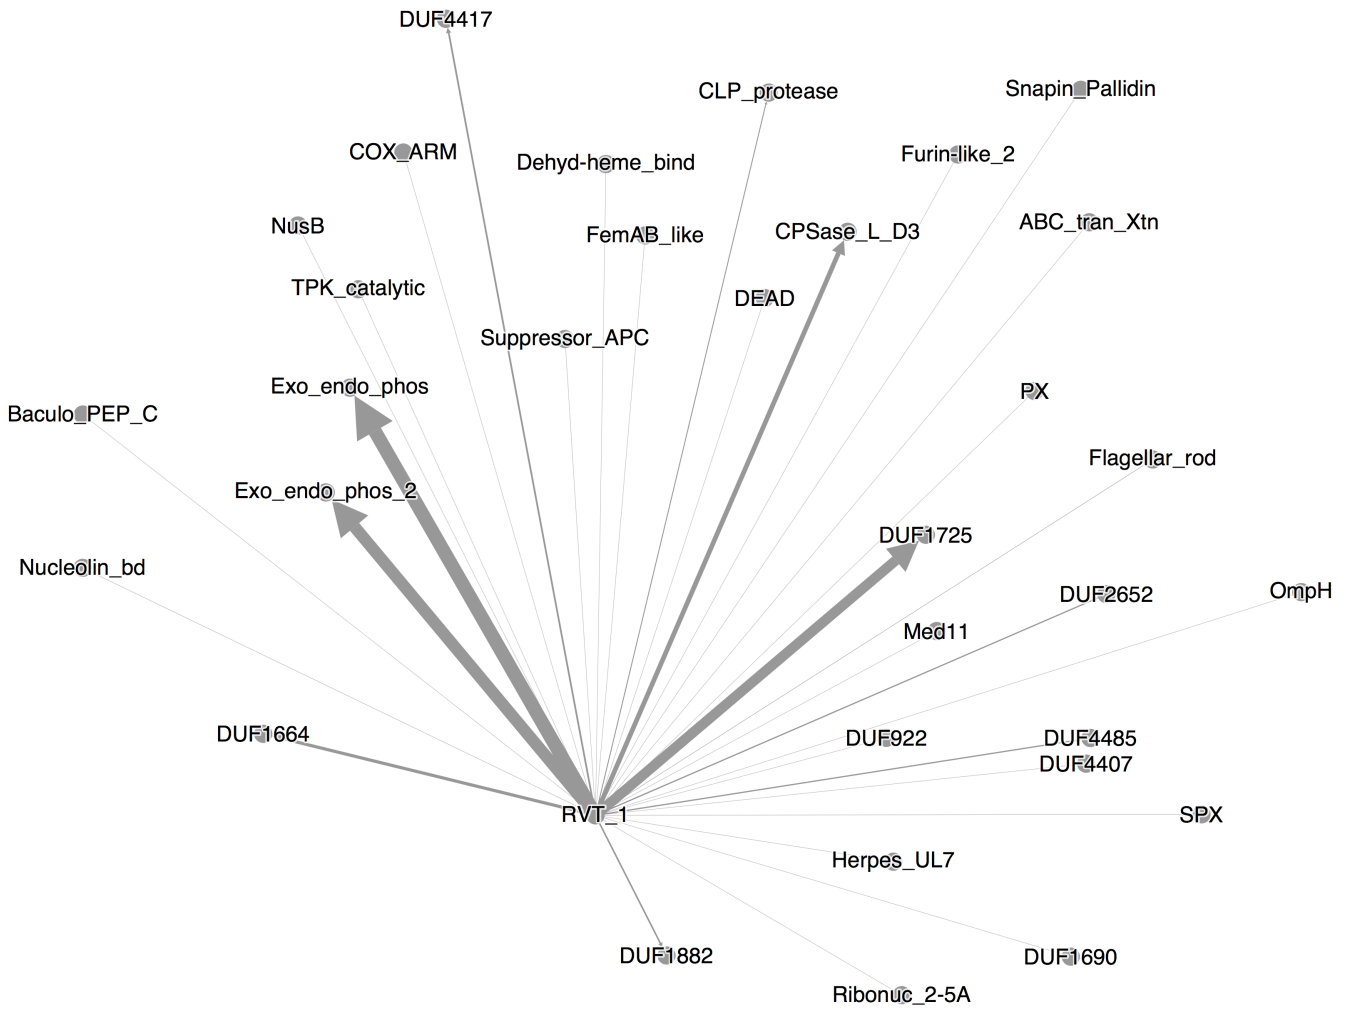

Figure 6a: Mammalia ORF2p domains

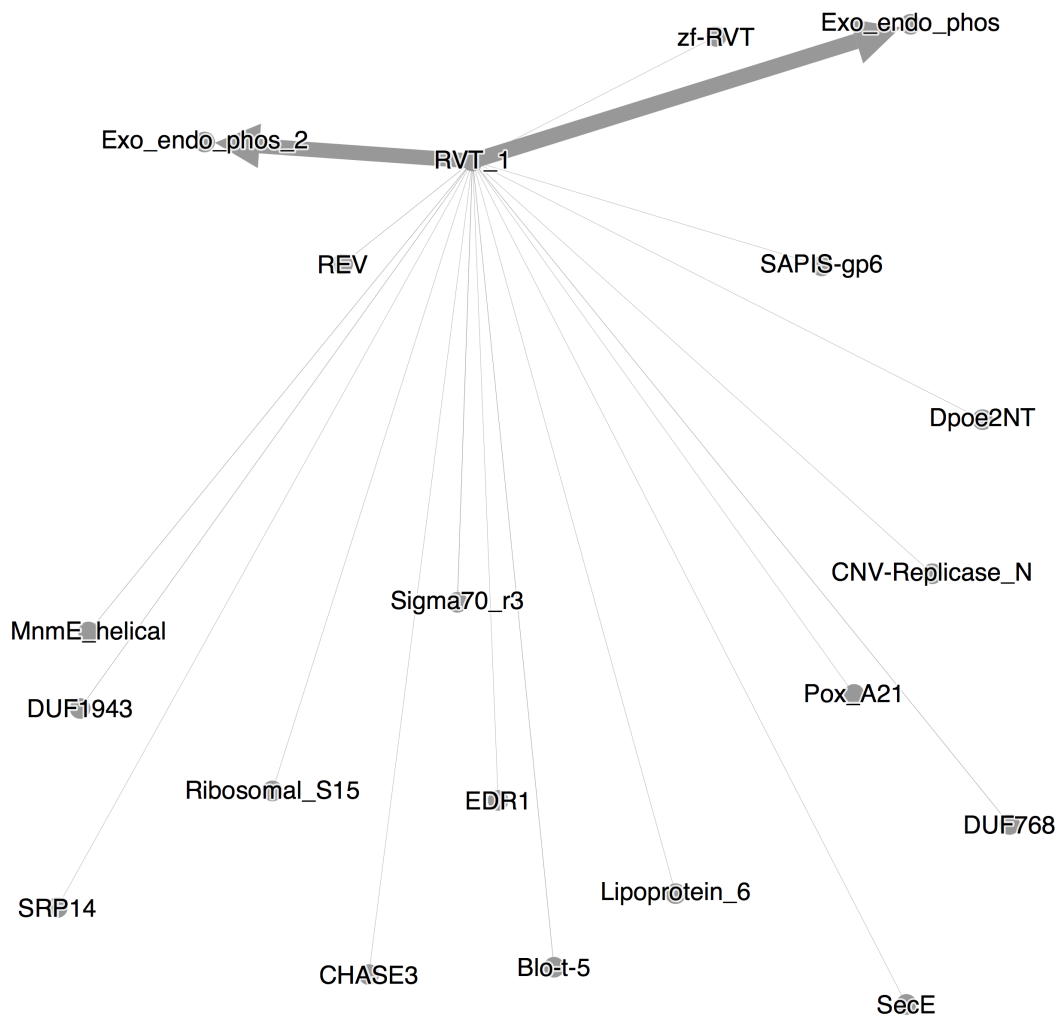

Figure 6b: **Sauropsida ORF2p domains**

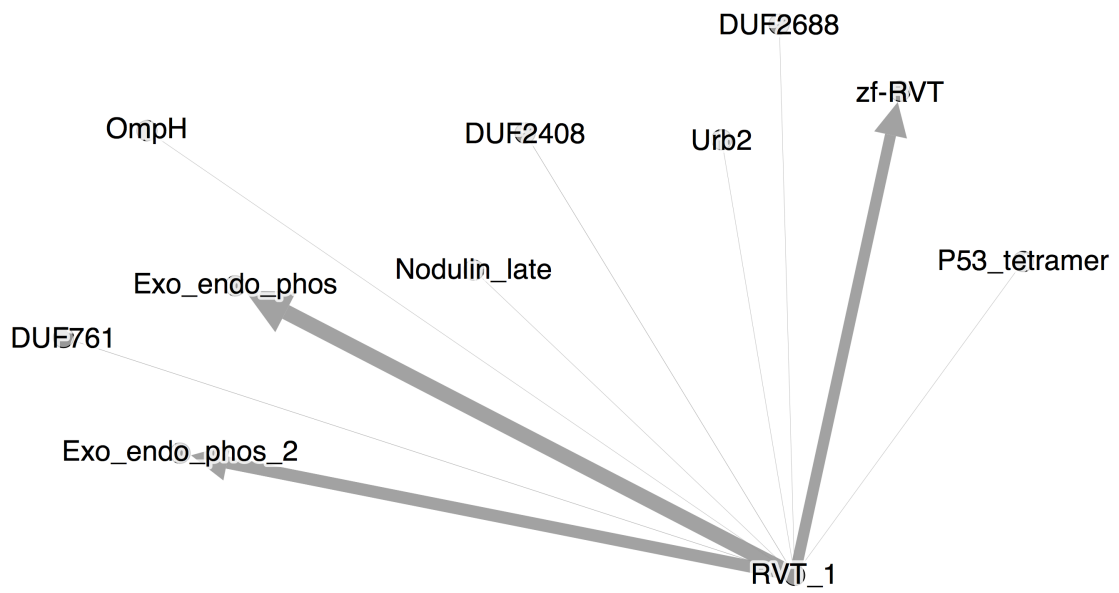

Figure 6c: **Amphibia ORF2p domains**

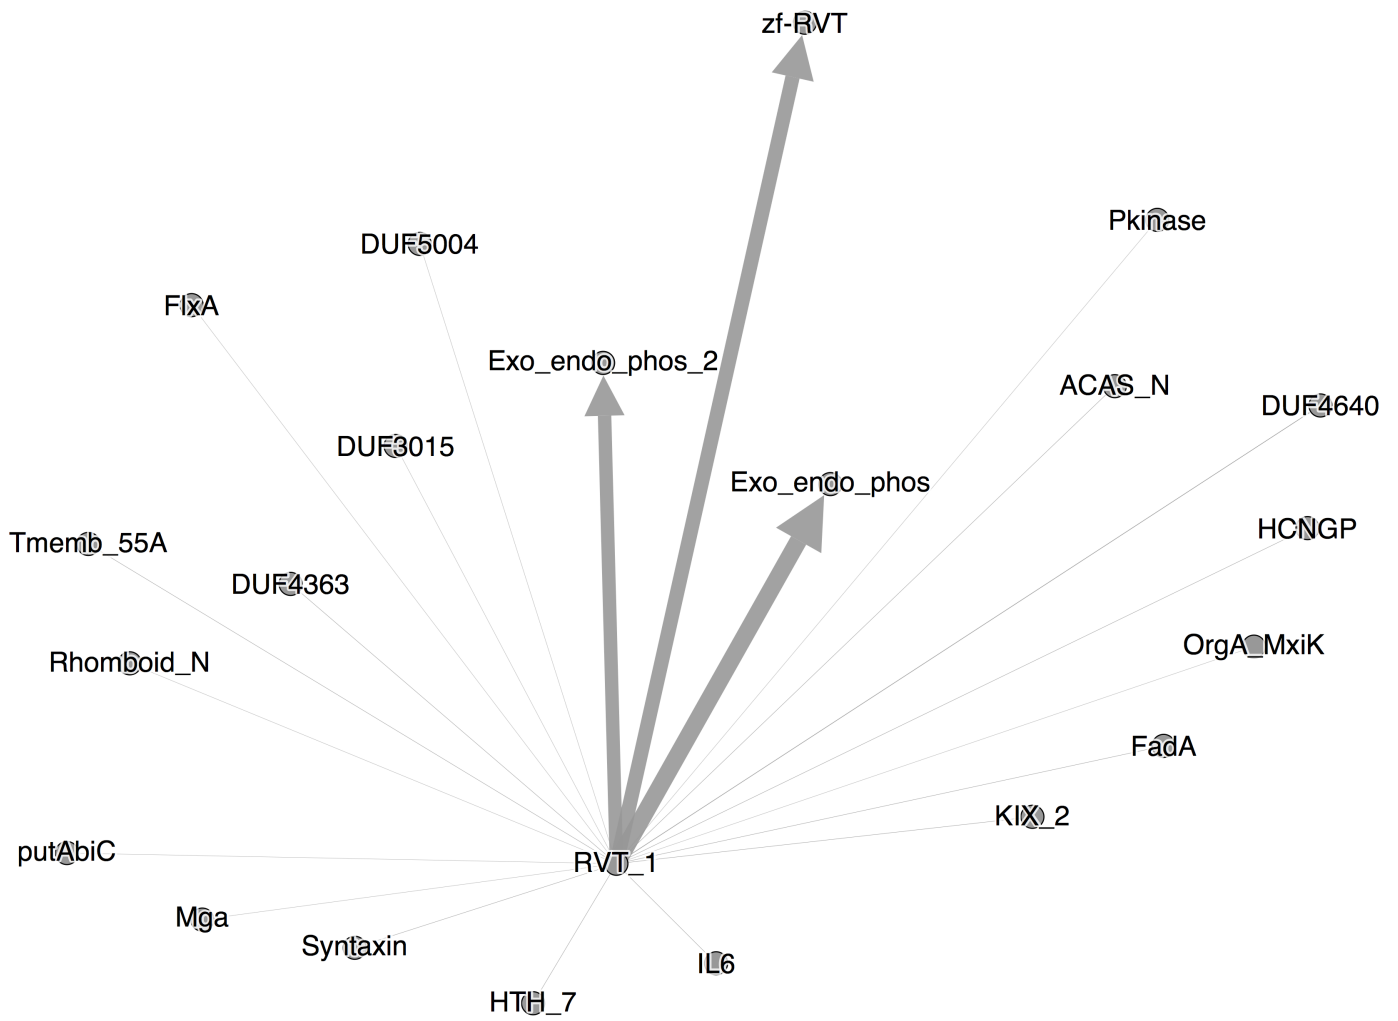

Figure 6d: Neopterygii ORF2p domains

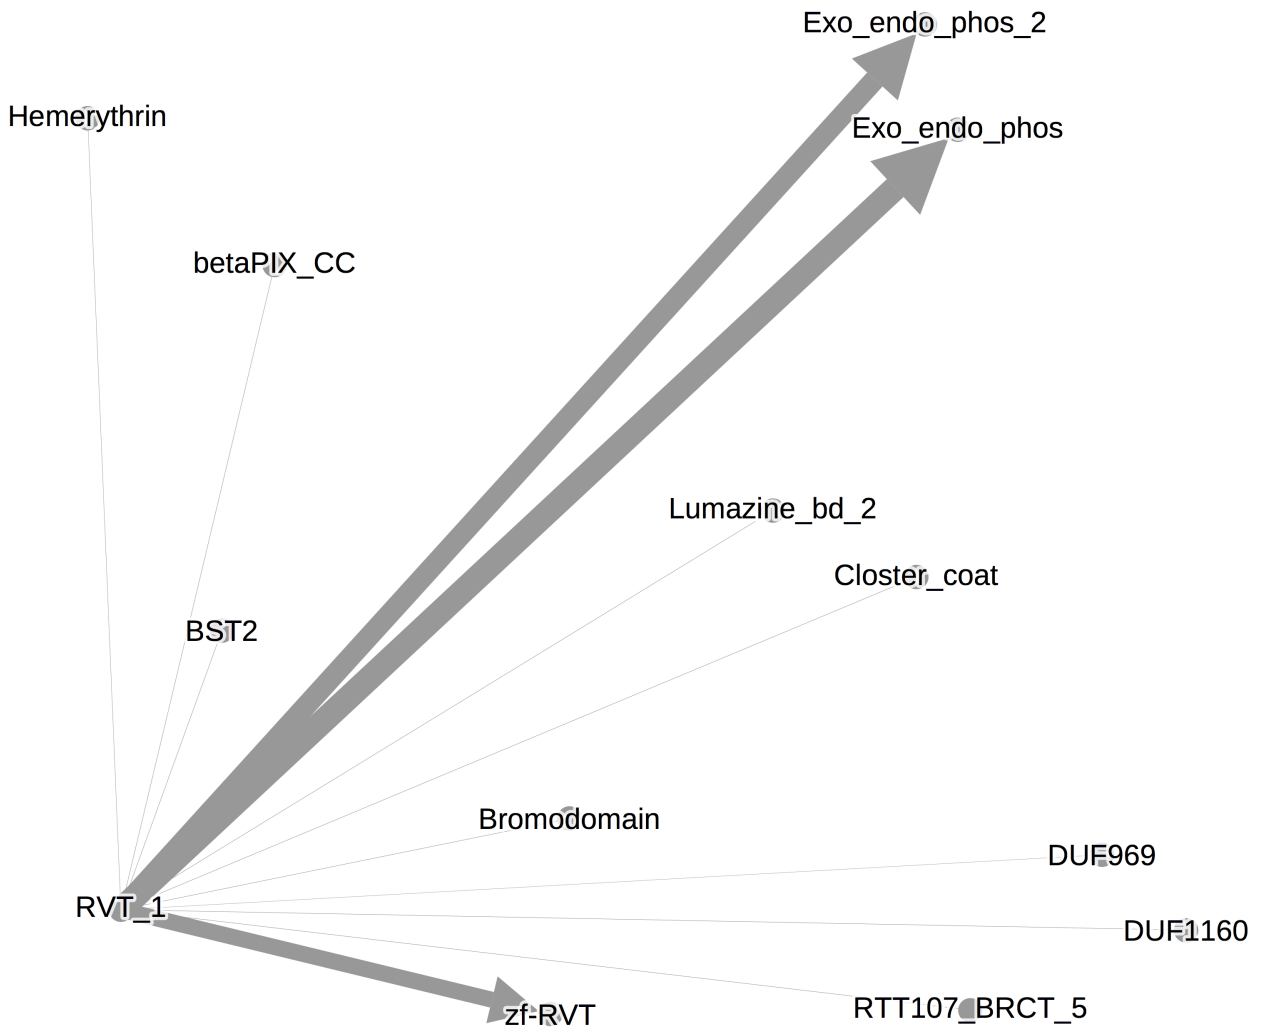

Figure 6e: **Ecdysozoa ORF2p domains**

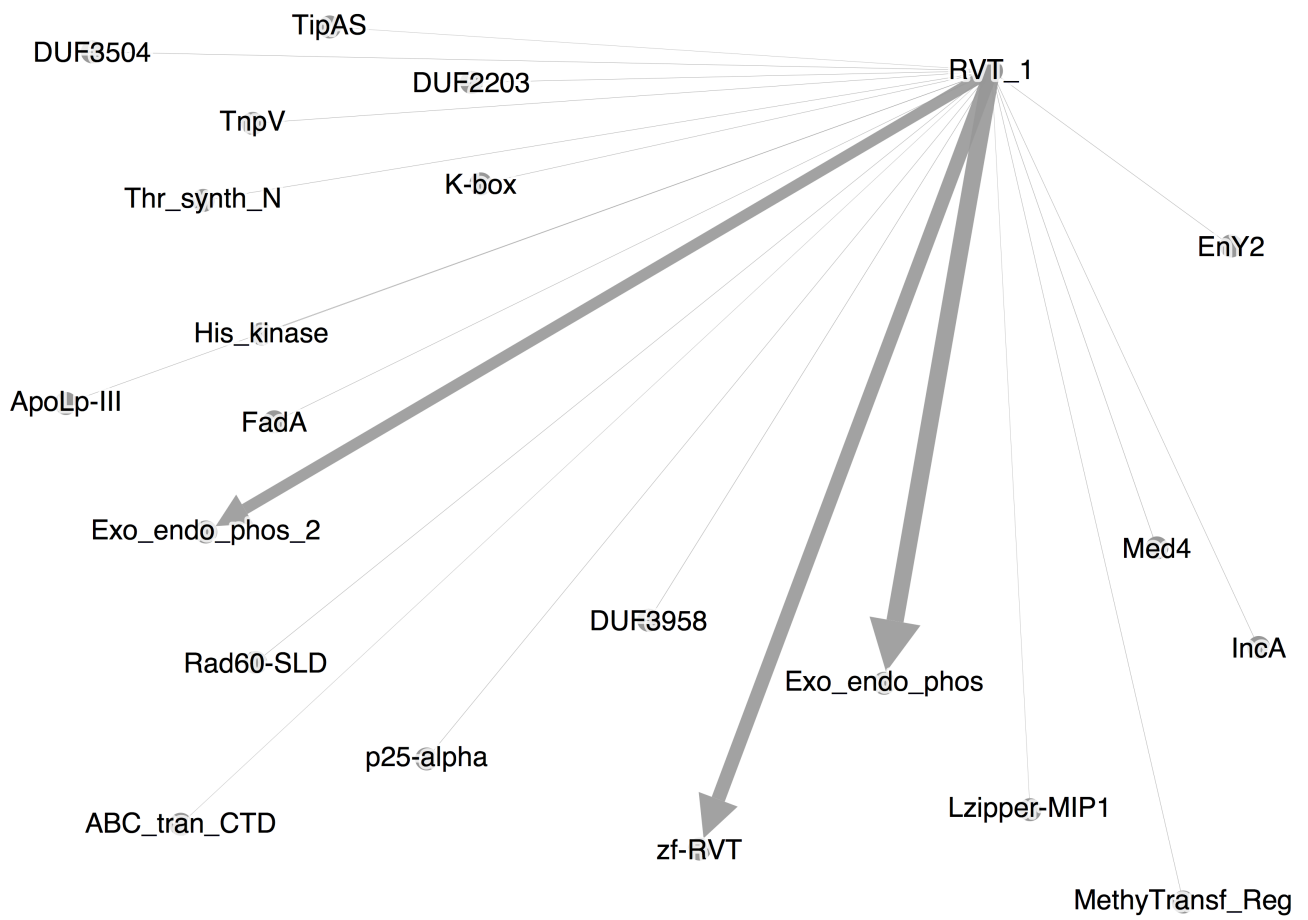

Figure 6f: **Other, primitive non-mammalian species - ORF2p domains**



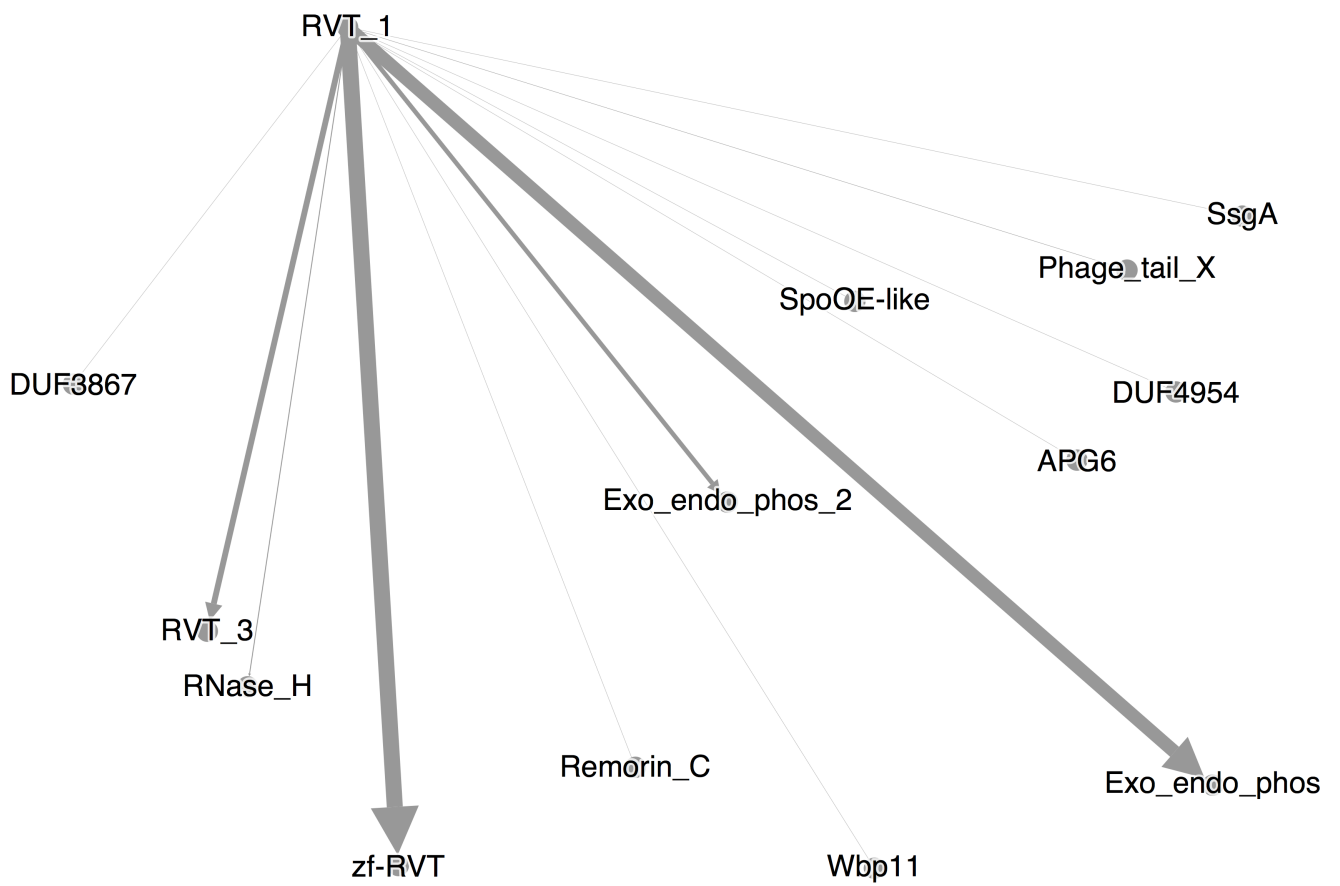

Figure 6g: Viridiplantae ORF2p domains

## 3.5 Variation of ORF1 proteins across species

### 3.5.1 Tables 11, 12: ORF1p domain identification analysis

Table 11: **Domains found within ORF1p sequences:** Known domains associated with L1 ORF1p include Transposase\_22 (vertebrates) and RRM/zf-CCHC (plants, diverse species). This table summarises the known domains seen in each species, and key unknown domains which appear frequently (DUF4283 in plants) or with very high support (HTH.1 in *Coccomyxa subellipsoidea*). Note that even some mammals contain diverse L1s with RRM/zf-CCHC combinations.

| Species                               | Known ORF1p domains |                        |                                                   | Novel ORF1p domains |     |
|---------------------------------------|---------------------|------------------------|---------------------------------------------------|---------------------|-----|
|                                       | Transposase         | RRM                    | zf-CCHC                                           | DUF4283             | HTH |
| <b>MAMMALIAN SPECIES</b>              |                     |                        |                                                   |                     |     |
| <i>Monodelphis domestica</i>          | Transposase_22      |                        | zf-CCHC,<br>zf-CCHC_2,<br>zf-CCHC_3               |                     |     |
| <i>Macropus eugenii</i>               | Transposase_22      |                        |                                                   |                     |     |
| <i>Sarcophilus harrisii</i>           | Transposase_22      |                        |                                                   |                     |     |
| <i>Dasypus novemcinctus</i>           | Transposase_22      |                        | zf-CCHC_2                                         |                     |     |
| <i>Choloepus hoffmanni</i>            | Transposase_22      |                        | zf-CCHC_2                                         |                     |     |
| <i>Chrysochloris asiatica</i>         | Transposase_22      |                        |                                                   |                     |     |
| <i>Echinops telfairi</i>              | Transposase_22      |                        |                                                   |                     |     |
| <i>Orycteropus afer afer</i>          | Transposase_22      |                        |                                                   |                     |     |
| <i>Elephantulus edwardii</i>          | Transposase_22      | RRM_1, RRM_6           | zf-CCHC                                           |                     |     |
| <i>Trichechus manatus latirostris</i> | Transposase_22      |                        | zf-CCHC,<br>zf-CCHC_2                             |                     |     |
| <i>Procavia capensis</i>              | Transposase_22      |                        |                                                   |                     |     |
| <i>Loxodonta africana</i>             | Transposase_22      |                        |                                                   |                     |     |
| <i>Erinaceus europaeus</i>            | Transposase_22      |                        |                                                   |                     |     |
| <i>Sorex araneus</i>                  | Transposase_22      |                        |                                                   |                     |     |
| <i>Condylura cristata</i>             | Transposase_22      |                        |                                                   |                     |     |
| <i>Pteropus alecto</i>                | Transposase_22      |                        |                                                   |                     |     |
| <i>Pteropus vampyrus</i>              | Transposase_22      |                        |                                                   |                     |     |
| <i>Eidolon helvum</i>                 | Transposase_22      |                        |                                                   |                     |     |
| <i>Rhinolophus ferrumequinum</i>      | Transposase_22      |                        |                                                   |                     |     |
| <i>Pteronotus parnellii</i>           | Transposase_22      |                        |                                                   |                     |     |
| <i>Eptesicus fuscus</i>               | Transposase_22      |                        |                                                   |                     |     |
| <i>Myotis brandtii</i>                | Transposase_22      |                        |                                                   |                     |     |
| <i>Myotis davidii</i>                 | Transposase_22      |                        |                                                   |                     |     |
| <i>Myotis lucifugus</i>               | Transposase_22      | RRM_1, RRM_6,<br>RRM_7 | zf-CCHC,<br>zf-CCHC_3,<br>zf-CCHC_4,<br>zf-CCHC_5 |                     |     |
| <i>Ceratotherium simum simum</i>      | Transposase_22      | RRM_4                  |                                                   |                     |     |
| <i>Equus przewalskii</i>              | Transposase_22      | Nup35_RRM              |                                                   |                     |     |
| <i>Equus caballus</i> (Thoroughbred)  | Transposase_22      | Nup35_RRM              |                                                   |                     |     |
| <i>Equus caballus</i> (Mongolian)     | Transposase_22      | Nup35_RRM              |                                                   |                     |     |
| <i>Manis pentadactyla</i>             | Transposase_22      |                        |                                                   |                     |     |
| <i>Felis catus</i>                    | Transposase_22      |                        |                                                   |                     |     |

| Species                                         | Transposase    | RRM                                                                                  | zf-CCHC                                                         | DUF4283 | HTH |
|-------------------------------------------------|----------------|--------------------------------------------------------------------------------------|-----------------------------------------------------------------|---------|-----|
| <i>Panthera tigris altaica</i>                  | Transposase_22 |                                                                                      |                                                                 |         |     |
| <i>Canis lupus familiaris</i>                   | Transposase_22 | RRM_1, RRM_5,<br>RRM_6, RRM_7                                                        |                                                                 |         |     |
| <i>Ursus maritimus</i>                          | Transposase_22 |                                                                                      |                                                                 |         |     |
| <i>Ailuropoda melanoleuca</i>                   | Transposase_22 |                                                                                      |                                                                 |         |     |
| <i>Leptonychotes weddellii</i>                  | Transposase_22 |                                                                                      |                                                                 |         |     |
| <i>Odobenus rosmarus divergens</i>              | Transposase_22 | Nup35_RRM_2,<br>RBM1CTR,<br>RRM_1, RRM_3,<br>RRM_5, RRM_6,<br>RRM_7,<br>RRM_occluded |                                                                 |         |     |
| <i>Mustela putorius furo</i>                    | Transposase_22 |                                                                                      |                                                                 |         |     |
| <i>Camelus dromedarius</i>                      | Transposase_22 |                                                                                      |                                                                 |         |     |
| <i>Camelus ferus</i>                            | Transposase_22 |                                                                                      |                                                                 |         |     |
| <i>Vicugna pacos</i>                            | Transposase_22 |                                                                                      |                                                                 |         |     |
| <i>Sus scrofa</i> (Duroc)                       | Transposase_22 | RRM_5                                                                                |                                                                 |         |     |
| <i>Sus scrofa</i> (Tibetan)                     | Transposase_22 |                                                                                      |                                                                 |         |     |
| <i>Sus scrofa</i> (Ellegaard Gottingen minipig) | Transposase_22 |                                                                                      |                                                                 |         |     |
| <i>Balaenoptera acutorostrata scammoni</i>      | Transposase_22 | Nup35_RRM_2,<br>RRM_1, RRM_5,<br>RRM_6, RRM_7                                        |                                                                 |         |     |
| <i>Physeter catodon</i>                         | Transposase_22 |                                                                                      |                                                                 |         |     |
| <i>Lipotes vexillifer</i>                       | Transposase_22 | RRM_4                                                                                |                                                                 |         |     |
| <i>Tursiops truncatus</i>                       | Transposase_22 |                                                                                      |                                                                 |         |     |
| <i>Orcinus orca</i>                             | Transposase_22 | RRM_1, RRM_3,<br>RRM_5, RRM_6                                                        |                                                                 |         |     |
| <i>Pantholops hodgsonii</i>                     | Transposase_22 |                                                                                      |                                                                 |         |     |
| <i>Capra hircus</i>                             | Transposase_22 |                                                                                      |                                                                 |         |     |
| <i>Ovis aries</i> (Texel)                       | Transposase_22 |                                                                                      |                                                                 |         |     |
| <i>Ovis aries musimon</i>                       | Transposase_22 | RRM_1, RRM_5,<br>RRM_6, RRM_7,<br>RRM_occluded                                       |                                                                 |         |     |
| <i>Bubalus bubalis</i>                          | Transposase_22 |                                                                                      |                                                                 |         |     |
| <i>Bison bison bison</i>                        | Transposase_22 |                                                                                      |                                                                 |         |     |
| <i>Bos mutus</i>                                | Transposase_22 |                                                                                      |                                                                 |         |     |
| <i>Bos indicus</i>                              | Transposase_22 |                                                                                      |                                                                 |         |     |
| <i>Bos taurus</i>                               | Transposase_22 |                                                                                      |                                                                 |         |     |
| <i>Ochotona princeps</i>                        | Transposase_22 |                                                                                      |                                                                 |         |     |
| <i>Oryctolagus cuniculus</i>                    | Transposase_22 |                                                                                      |                                                                 |         |     |
| <i>Ictidomys tridecemlineatus</i>               | Transposase_22 |                                                                                      |                                                                 |         |     |
| <i>Heterocephalus glaber</i>                    | Transposase_22 |                                                                                      |                                                                 |         |     |
| <i>Fukomys damarensis</i>                       | Transposase_22 |                                                                                      |                                                                 |         |     |
| <i>Cavia aperea</i>                             | Transposase_22 |                                                                                      |                                                                 |         |     |
| <i>Cavia porcellus</i>                          | Transposase_22 |                                                                                      | zf-CCHC,<br>zf-CCHC_2,<br>zf-CCHC_5,<br>zf-CCHC_3,<br>zf-CCHC_4 |         |     |
| <i>Chinchilla lanigera</i>                      | Transposase_22 |                                                                                      |                                                                 |         |     |

| Species                                | Transposase    | RRM                                           | zf-CCHC                                           | DUF4283 | HTH |
|----------------------------------------|----------------|-----------------------------------------------|---------------------------------------------------|---------|-----|
| <i>Octodon degus</i>                   | Transposase_22 |                                               |                                                   |         |     |
| <i>Dipodomys ordii</i>                 | Transposase_22 |                                               |                                                   |         |     |
| <i>Jaculus jaculus</i>                 | Transposase_22 | RRM_5                                         |                                                   |         |     |
| <i>Nannospalax galili</i>              | Transposase_22 | RRM_5                                         | zf-CCHC_3,<br>zf-CCHC_5                           |         |     |
| <i>Mesocricetus auratus</i>            | Transposase_22 |                                               |                                                   |         |     |
| <i>Cricetulus griseus</i>              | Transposase_22 |                                               | zf-CCHC_5,<br>zf-CCHC,<br>zf-CCHC_3,<br>zf-CCHC_2 |         |     |
| <i>Microtus ochrogaster</i>            | Transposase_22 |                                               |                                                   |         |     |
| <i>Peromyscus maniculatus bairdii</i>  | Transposase_22 |                                               |                                                   |         |     |
| <i>Rattus norvegicus</i>               | Transposase_22 |                                               | zf-CCHC,<br>zf-CCHC_4,<br>zf-CCHC_5               |         |     |
| <i>Mus musculus</i>                    | Transposase_22 |                                               | zf-CCHC                                           |         |     |
| <i>Tupaia belangeri</i>                | Transposase_22 | RRM_1                                         |                                                   |         |     |
| <i>Tupaia chinensis</i>                | Transposase_22 | RRM_1, RRM_6                                  |                                                   |         |     |
| <i>Galeopterus variegatus</i>          | Transposase_22 | RRM_occluded                                  |                                                   |         |     |
| <i>Otolemur garnettii</i>              | Transposase_22 |                                               |                                                   |         |     |
| <i>Microcebus murinus</i>              | Transposase_22 | RRM_5, RRM_6                                  | zf-CCHC,<br>zf-CCHC_3,<br>zf-CCHC_4,<br>zf-CCHC_5 |         |     |
| <i>Tarsius syrichta</i>                | Transposase_22 |                                               |                                                   |         |     |
| <i>Callithrix jacchus</i>              | Transposase_22 | Nup35_RRM_2,<br>RRM_1, RRM_5,<br>RRM_6, RRM_7 |                                                   |         |     |
| <i>Saimiri boliviensis boliviensis</i> | Transposase_22 |                                               |                                                   |         |     |
| <i>Rhinopithecus roxellana</i>         | Transposase_22 |                                               |                                                   |         |     |
| <i>Nasalis larvatus</i>                | Transposase_22 |                                               |                                                   |         |     |
| <i>Chlorocebus sabaeus</i>             | Transposase_22 | RRM_1, RRM_6,<br>RRM_7                        |                                                   |         |     |
| <i>Macaca fascicularis</i>             | Transposase_22 |                                               |                                                   |         |     |
| <i>Macaca mulatta</i>                  | Transposase_22 | RRM_1, RRM_5,<br>RRM_6, RRM_7                 |                                                   |         |     |
| <i>Papio anubis</i>                    | Transposase_22 |                                               |                                                   |         |     |
| <i>Nomascus leucogenys</i>             | Transposase_22 |                                               |                                                   |         |     |
| <i>Pongo abelii</i>                    | Transposase_22 | RRM_6                                         |                                                   |         |     |
| <i>Gorilla gorilla gorilla</i>         | Transposase_22 | RRM_1, RRM_5,<br>RRM_6, RRM_7                 |                                                   |         |     |
| <i>Pan paniscus</i>                    | Transposase_22 | RRM_1, RRM_6,<br>RRM_7                        |                                                   |         |     |
| <i>Pan troglodytes</i>                 | Transposase_22 |                                               |                                                   |         |     |
| <i>Homo sapiens</i>                    | Transposase_22 |                                               |                                                   |         |     |
| <b>NON-MAMMALIAN ANIMAL SPECIES</b>    |                |                                               |                                                   |         |     |
| <b>Sauropsida</b>                      |                |                                               |                                                   |         |     |
| <i>Apalone spinifera</i>               |                |                                               | zf-CCHC,<br>zf-CCHC_4                             |         |     |

| Species                            | Transposase    | RRM                    | zf-CCHC                                                                       | DUF4283 | HTH |
|------------------------------------|----------------|------------------------|-------------------------------------------------------------------------------|---------|-----|
| <i>Pelodiscus sinensis</i>         |                |                        | zf-CCHC,<br>zf-CCHC_2,<br>zf-CCHC_4,<br>zf-CCHC_6                             |         |     |
| <i>Chelonia mydas</i>              |                |                        | zf-CCHC,<br>zf-CCHC_2,<br>zf-CCHC_4,<br>zf-CCHC_6                             |         |     |
| <i>Chrysemys picta bellii</i>      | Transposase_22 |                        | zf-CCHC,<br>zf-CCHC_2,<br>zf-CCHC_4,<br>zf-CCHC_6                             |         |     |
| <i>Alligator mississippiensis</i>  |                | RRM_6                  | zf-CCHC,<br>zf-CCHC_2,<br>zf-CCHC_3,<br>zf-CCHC_4,<br>zf-CCHC_5               |         |     |
| <i>Alligator sinensis</i>          |                | RRM_6                  | zf-CCHC,<br>zf-CCHC_2,<br>zf-CCHC_3,<br>zf-CCHC_4,<br>zf-CCHC_5,<br>zf-CCHC_6 |         |     |
| <i>Crocodylus porosus</i>          | Transposase_22 | RRM_1, RRM_6,<br>RRM_7 | zf-CCHC,<br>zf-CCHC_2,<br>zf-CCHC_3,<br>zf-CCHC_4,<br>zf-CCHC_5               |         |     |
| <i>Gavialis gangeticus</i>         | Transposase_22 | RRM_1, RRM_6           | zf-CCHC,<br>zf-CCHC_3,<br>zf-CCHC_4,<br>zf-CCHC_5,<br>zf-CCHC_6               |         |     |
| <i>Anolis carolinensis</i>         | Transposase_22 |                        | zf-CCHC                                                                       |         |     |
| <i>Vipera berus berus</i>          | Transposase_22 |                        |                                                                               |         |     |
| <i>Crotalus mitchellii pyrrhus</i> | Transposase_22 |                        |                                                                               |         |     |
| <i>Ophiophagus hannah</i>          | Transposase_22 |                        |                                                                               |         |     |
| <b>Amphibia</b>                    |                |                        |                                                                               |         |     |
| <i>Xenopus tropicalis</i>          | Transposase_22 |                        | zf-CCHC,<br>zf-CCHC_2,<br>zf-CCHC_3,<br>zf-CCHC_4,<br>zf-CCHC_5,<br>zf-CCHC_6 |         |     |
| <i>Nanorana parkeri</i>            | Transposase_22 |                        | zf-CCHC,<br>zf-CCHC_2,<br>zf-CCHC_3,<br>zf-CCHC_4,<br>zf-CCHC_6               |         |     |
| <b>Neopterygii</b>                 |                |                        |                                                                               |         |     |

| Species                       | Transposase    | RRM                    | zf-CCHC                                                                       | DUF4283 | HTH |
|-------------------------------|----------------|------------------------|-------------------------------------------------------------------------------|---------|-----|
| <i>Lepisosteus oculatus</i>   |                |                        | zf-CCHC,<br>zf-CCHC_2,<br>zf-CCHC_6                                           |         |     |
| <i>Anguilla anguilla</i>      | Transposase_22 |                        | zf-CCHC,<br>zf-CCHC_2,<br>zf-CCHC_3,<br>zf-CCHC_4,<br>zf-CCHC_5               |         |     |
| <i>Anguilla japonica</i>      | Transposase_22 |                        | zf-CCHC,<br>zf-CCHC_2,<br>zf-CCHC_3,<br>zf-CCHC_4,<br>zf-CCHC_5,<br>zf-CCHC_6 |         |     |
| <i>Danio rerio</i>            | Transposase_22 | RRM_1, RRM_6,<br>RRM_7 | zf-CCHC,<br>zf-CCHC_2,<br>zf-CCHC_3,<br>zf-CCHC_4,<br>zf-CCHC_5,<br>zf-CCHC_6 |         |     |
| <i>Astyanax mexicanus</i>     | Transposase_22 |                        | zf-CCHC,<br>zf-CCHC_2,<br>zf-CCHC_4,<br>zf-CCHC_6                             |         |     |
| <i>Oryzias latipes</i>        | Transposase_22 |                        | zf-CCHC,<br>zf-CCHC_2,<br>zf-CCHC_4,<br>zf-CCHC_6                             |         |     |
| <i>Poecilia formosa</i>       | Transposase_22 | RRM_6                  | zf-CCHC,<br>zf-CCHC_2,<br>zf-CCHC_4                                           |         |     |
| <i>Xiphophorus maculatus</i>  | Transposase_22 |                        |                                                                               |         |     |
| <i>Fundulus heteroclitus</i>  | Transposase_22 |                        | zf-CCHC,<br>zf-CCHC_2                                                         |         |     |
| <i>Takifugu flavidus</i>      |                |                        | zf-CCHC,<br>zf-CCHC_2,<br>zf-CCHC_6                                           |         |     |
| <i>Takifugu rubripes</i>      |                |                        | zf-CCHC,<br>zf-CCHC_2,<br>zf-CCHC_4,<br>zf-CCHC_6                             |         |     |
| <i>Tetraodon nigroviridis</i> |                | RRM_6, RRM_7           | zf-CCHC,<br>zf-CCHC_2,<br>zf-CCHC_4,<br>zf-CCHC_6                             |         |     |
| <i>Haplochromis burtoni</i>   | Transposase_22 |                        | zf-CCHC,<br>zf-CCHC_2,<br>zf-CCHC_3,<br>zf-CCHC_6                             |         |     |
| <i>Pundamilia nyererei</i>    | Transposase_22 |                        | zf-CCHC,<br>zf-CCHC_6                                                         |         |     |

| Species                         | Transposase    | RRM                                                                      | zf-CCHC                                                         | DUF4283 | HTH |
|---------------------------------|----------------|--------------------------------------------------------------------------|-----------------------------------------------------------------|---------|-----|
| <i>Maylandia zebra</i>          | Transposase_22 |                                                                          | zf-CCHC,<br>zf-CCHC_2,<br>zf-CCHC_3,<br>zf-CCHC_4               |         |     |
| <i>Neolamprologus brichardi</i> | Transposase_22 |                                                                          | zf-CCHC,<br>zf-CCHC_2,<br>zf-CCHC_4,<br>zf-CCHC_6               |         |     |
| <i>Oreochromis niloticus</i>    | Transposase_22 | Nup35_RRM,<br>RRM_6                                                      | zf-CCHC,<br>zf-CCHC_2,<br>zf-CCHC_3,<br>zf-CCHC_4,<br>zf-CCHC_6 |         |     |
| <i>Sebastes nigrocinctus</i>    | Transposase_22 |                                                                          |                                                                 |         |     |
| <i>Sebastes rubrivinctus</i>    | Transposase_22 |                                                                          | zf-CCHC,<br>zf-CCHC_2,<br>zf-CCHC_3,<br>zf-CCHC_4,<br>zf-CCHC_5 |         |     |
| <i>Gasterosteus aculeatus</i>   |                | RRM_6                                                                    | zf-CCHC,<br>zf-CCHC_2,<br>zf-CCHC_4,<br>zf-CCHC_5               |         |     |
| <i>Gadus morhua</i>             | Transposase_22 | RRM_6                                                                    | zf-CCHC,<br>zf-CCHC_2,<br>zf-CCHC_3,<br>zf-CCHC_4,<br>zf-CCHC_5 |         |     |
| <b>Ecdysozoa</b>                |                |                                                                          |                                                                 |         |     |
| <i>Aedes aegypti</i>            |                | Nup35_RRM_2,<br>RRM_1, RRM_3,<br>RRM_5, RRM_6,<br>RRM_7,<br>RRM_occluded | zf-CCHC,<br>zf-CCHC_2,<br>zf-CCHC_3,<br>zf-CCHC_4               |         |     |
| <i>Culex quinquefasciatus</i>   |                | Nup35_RRM_2,<br>RRM_1, RRM_5,<br>RRM_6,<br>RRM_occluded                  | zf-CCHC,<br>zf-CCHC_4,<br>zf-CCHC_5                             |         |     |
| <i>Anopheles arabiensis</i>     |                | RRM_1, RRM_6                                                             |                                                                 |         |     |
| <i>Anopheles atroparvus</i>     |                | RRM_1                                                                    |                                                                 |         |     |
| <i>Anopheles culicifacies</i>   |                | RRM_occluded                                                             |                                                                 |         |     |
| <i>Anopheles dirus</i>          |                | RRM_1, RRM_6                                                             |                                                                 |         |     |
| <i>Anopheles epiroticus</i>     |                | RRM_1, RRM_6,<br>RRM_occluded                                            |                                                                 |         |     |
| <i>Anopheles farauti</i>        |                | RRM_1, RRM_5                                                             |                                                                 |         |     |
| <i>Anopheles funestus</i>       |                | RRM_6,<br>RRM_occluded                                                   |                                                                 |         |     |
| <i>Anopheles gambiae</i>        |                | RRM_1, RRM_6,<br>RRM_occluded                                            |                                                                 |         |     |
| <i>Anopheles maculatus</i>      |                | RRM_6                                                                    |                                                                 |         |     |
| <i>Anopheles sinensis</i>       |                | RRM_1                                                                    |                                                                 |         |     |

| Species                              | Transposase            | RRM   | zf-CCHC                                                                       | DUF4283 | HTH |
|--------------------------------------|------------------------|-------|-------------------------------------------------------------------------------|---------|-----|
| <i>Drosophila ananassae</i>          | RRM_1, RRM_6,<br>RRM_7 |       |                                                                               |         |     |
| <i>Drosophila virilis</i>            |                        | RRM_5 |                                                                               |         |     |
| <i>Ixodes ricinus</i>                | Transposase_22         |       | zf-CCHC,<br>zf-CCHC_4,<br>zf-CCHC_5,<br>zf-CCHC_6                             |         |     |
| <i>Ixodes scapularis</i>             | Transposase_22         |       | zf-CCHC,<br>zf-CCHC_2,<br>zf-CCHC_4,<br>zf-CCHC_5                             |         |     |
| <i>Rhipicephalus microplus</i>       | Transposase_22         |       |                                                                               |         |     |
| <b>Other</b>                         |                        |       |                                                                               |         |     |
| <i>Crassostrea gigas</i>             |                        |       | zf-CCHC,<br>zf-CCHC_2,<br>zf-CCHC_3                                           |         |     |
| <i>Lottia gigantea</i>               |                        |       | zf-CCHC,<br>zf-CCHC_2,<br>zf-CCHC_3,<br>zf-CCHC_4                             |         |     |
| <i>Aplysia californica</i>           |                        |       | zf-CCHC,<br>zf-CCHC_3,<br>zf-CCHC_4                                           |         |     |
| <i>Nematostella vectensis</i>        | Transposase_22         |       | zf-CCHC,<br>zf-CCHC_3                                                         |         |     |
| <i>Strongylocentrotus purpuratus</i> |                        |       | zf-CCHC,<br>zf-CCHC_2,<br>zf-CCHC_3,<br>zf-CCHC_4                             |         |     |
| <i>Saccoglossus kowalevskii</i>      | Transposase_22         | RRM_6 | zf-CCHC,<br>zf-CCHC_2,<br>zf-CCHC_3,<br>zf-CCHC_4,<br>zf-CCHC_5               |         |     |
| <i>Ciona savignyi</i>                |                        |       | zf-CCHC,<br>zf-CCHC_2,<br>zf-CCHC_3,<br>zf-CCHC_4,<br>zf-CCHC_6               |         |     |
| <i>Branchiostoma floridae</i>        |                        |       | zf-CCHC,<br>zf-CCHC_2,<br>zf-CCHC_3,<br>zf-CCHC_4,<br>zf-CCHC_5,<br>zf-CCHC_6 |         |     |
| <i>Lethenteron camtschaticum</i>     |                        |       | zf-CCHC,<br>zf-CCHC_2,<br>zf-CCHC_4,<br>zf-CCHC_6                             |         |     |
| <i>Petromyzon marinus</i>            |                        |       | zf-CCHC,<br>zf-CCHC_2,<br>zf-CCHC_4                                           |         |     |



| Species                    | Transposase    | RRM | zf-CCHC                                                                       | DUF4283 | HTH |
|----------------------------|----------------|-----|-------------------------------------------------------------------------------|---------|-----|
| <i>Latimeria chalumnae</i> | Transposase_22 |     | zf-CCHC,<br>zf-CCHC_2,<br>zf-CCHC_3,<br>zf-CCHC_4,<br>zf-CCHC_5,<br>zf-CCHC_6 |         |     |

**PLANT SPECIES**

|                                                   |  |  |                                                                               |         |       |
|---------------------------------------------------|--|--|-------------------------------------------------------------------------------|---------|-------|
| <i>Coccothraux subellipsoidea</i><br><i>C-169</i> |  |  |                                                                               |         | HTH_1 |
| <i>Selaginella moellendorffii</i>                 |  |  | zf-CCHC,<br>zf-CCHC_4                                                         | DUF4283 |       |
| <i>Pinus taeda</i>                                |  |  | zf-CCHC,<br>zf-CCHC_2,<br>zf-CCHC_3,<br>zf-CCHC_4,<br>zf-CCHC_6               | DUF4283 |       |
| <i>Amborella trichopoda</i>                       |  |  | zf-CCHC_4                                                                     | DUF4283 |       |
| <i>Phoenix dactylifera</i>                        |  |  | zf-CCHC_4,<br>zf-CCHC_6                                                       | DUF4283 |       |
| <i>Musa acuminata</i>                             |  |  | zf-CCHC,<br>zf-CCHC_2                                                         | DUF4283 |       |
| <i>Sorghum bicolor</i>                            |  |  | zf-CCHC,<br>zf-CCHC_2,<br>zf-CCHC_3,<br>zf-CCHC_4,<br>zf-CCHC_5,<br>zf-CCHC_6 | DUF4283 |       |
| <i>Zea mays</i>                                   |  |  | zf-CCHC,<br>zf-CCHC_2,<br>zf-CCHC_3,<br>zf-CCHC_4,<br>zf-CCHC_5,<br>zf-CCHC_6 | DUF4283 |       |
| <i>Setaria italica</i>                            |  |  | zf-CCHC,<br>zf-CCHC_3,<br>zf-CCHC_4,<br>zf-CCHC_5,<br>zf-CCHC_6               | DUF4283 |       |
| <i>Brachypodium distachyon</i>                    |  |  | zf-CCHC,<br>zf-CCHC_2,<br>zf-CCHC_4,<br>zf-CCHC_5,<br>zf-CCHC_6               | DUF4283 |       |
| <i>Leersia perrieri</i>                           |  |  | zf-CCHC,<br>zf-CCHC_4                                                         | DUF4283 |       |
| <i>Oryza barthii</i>                              |  |  | zf-CCHC,<br>zf-CCHC_2,<br>zf-CCHC_3,<br>zf-CCHC_4,<br>zf-CCHC_5,<br>zf-CCHC_6 | DUF4283 |       |

| Species                            | Transposase | RRM   | zf-CCHC                                                                       | DUF4283 | HTH |
|------------------------------------|-------------|-------|-------------------------------------------------------------------------------|---------|-----|
| <i>Oryza brachyantha</i>           |             |       | zf-CCHC,<br>zf-CCHC_3,<br>zf-CCHC_4                                           | DUF4283 |     |
| <i>Oryza glumipatula</i>           |             |       | zf-CCHC,<br>zf-CCHC_2,<br>zf-CCHC_3,<br>zf-CCHC_4,<br>zf-CCHC_5               | DUF4283 |     |
| <i>Oryza longistaminata</i>        |             |       | zf-CCHC,<br>zf-CCHC_2,<br>zf-CCHC_3,<br>zf-CCHC_4,<br>zf-CCHC_5               | DUF4283 |     |
| <i>Oryza meridionalis</i>          |             |       | zf-CCHC,<br>zf-CCHC_3,<br>zf-CCHC_4,<br>zf-CCHC_5                             | DUF4283 |     |
| <i>Oryza nivara</i>                |             |       | zf-CCHC,<br>zf-CCHC_3,<br>zf-CCHC_4,<br>zf-CCHC_5                             | DUF4283 |     |
| <i>Oryza punctata</i>              |             |       | zf-CCHC,<br>zf-CCHC_3,<br>zf-CCHC_4,<br>zf-CCHC_5                             | DUF4283 |     |
| <i>Oryza sativa Japonica Group</i> |             |       | zf-CCHC,<br>zf-CCHC_3,<br>zf-CCHC_4,<br>zf-CCHC_5                             | DUF4283 |     |
| <i>Aegilops tauschii</i>           |             |       | zf-CCHC,<br>zf-CCHC_2,<br>zf-CCHC_3,<br>zf-CCHC_4,<br>zf-CCHC_5,<br>zf-CCHC_6 | DUF4283 |     |
| <i>Triticum urartu</i>             |             |       | zf-CCHC,<br>zf-CCHC_2,<br>zf-CCHC_3,<br>zf-CCHC_4,<br>zf-CCHC_5,<br>zf-CCHC_6 | DUF4283 |     |
| <i>Nelumbo nucifera</i>            |             |       | zf-CCHC_4                                                                     | DUF4283 |     |
| <i>Lupinus angustifolius</i>       |             | RRM_7 | zf-CCHC,<br>zf-CCHC_2,<br>zf-CCHC_3,<br>zf-CCHC_4,<br>zf-CCHC_6               | DUF4283 |     |
| <i>Phaseolus vulgaris</i>          |             |       | zf-CCHC_4                                                                     | DUF4283 |     |
| <i>Cajanus cajan</i>               |             |       | zf-CCHC,<br>zf-CCHC_4,<br>zf-CCHC_5,<br>zf-CCHC_6                             | DUF4283 |     |

| Species                            | Transposase | RRM                           | zf-CCHC                                                         | DUF4283 | HTH |
|------------------------------------|-------------|-------------------------------|-----------------------------------------------------------------|---------|-----|
| <i>Glycine max</i>                 |             | RRM_1, RRM_5,<br>RRM_6, RRM_7 | zf-CCHC,<br>zf-CCHC_4,<br>zf-CCHC_6                             | DUF4283 |     |
| <i>Glycine soja</i>                |             | RRM_1, RRM_5,<br>RRM_6, RRM_7 | zf-CCHC,<br>zf-CCHC_4,<br>zf-CCHC_6                             | DUF4283 |     |
| <i>Medicago truncatula</i>         |             | RRM_1                         | zf-CCHC,<br>zf-CCHC_4,<br>zf-CCHC_6                             | DUF4283 |     |
| <i>Trifolium pratense</i>          |             | RRM_1, RRM_5                  | zf-CCHC,<br>zf-CCHC_2,<br>zf-CCHC_3,<br>zf-CCHC_4,<br>zf-CCHC_6 | DUF4283 |     |
| <i>Lotus japonicus</i>             |             |                               | zf-CCHC,<br>zf-CCHC_3,<br>zf-CCHC_4,<br>zf-CCHC_5,<br>zf-CCHC_6 | DUF4283 |     |
| <i>Malus x domestica</i>           |             |                               | zf-CCHC,<br>zf-CCHC_4,<br>zf-CCHC_5,<br>zf-CCHC_6               | DUF4283 |     |
| <i>Pyrus x bretschneideri</i>      |             |                               | zf-CCHC,<br>zf-CCHC_3,<br>zf-CCHC_4,<br>zf-CCHC_5,<br>zf-CCHC_6 | DUF4283 |     |
| <i>Prunus mume</i>                 |             |                               | zf-CCHC,<br>zf-CCHC_2,<br>zf-CCHC_4                             | DUF4283 |     |
| <i>Prunus persica</i>              |             |                               | zf-CCHC,<br>zf-CCHC_2,<br>zf-CCHC_4,<br>zf-CCHC_6               | DUF4283 |     |
| <i>Fragaria iinumae</i>            |             |                               | zf-CCHC_4,<br>zf-CCHC_6                                         | DUF4283 |     |
| <i>Fragaria nubicola</i>           |             | Nup35_RRM_2                   | zf-CCHC,<br>zf-CCHC_4,<br>zf-CCHC_5                             | DUF4283 |     |
| <i>Fragaria orientalis</i>         |             |                               | zf-CCHC,<br>zf-CCHC_4                                           | DUF4283 |     |
| <i>Fragaria vesca subsp. vesca</i> |             |                               | zf-CCHC,<br>zf-CCHC_4,<br>zf-CCHC_6                             | DUF4283 |     |
| <i>Fragaria x ananassa</i>         |             |                               | zf-CCHC,<br>zf-CCHC_4,<br>zf-CCHC_6                             | DUF4283 |     |
| <i>Morus notabilis</i>             |             |                               | zf-CCHC,<br>zf-CCHC_3,<br>zf-CCHC_4                             | DUF4283 |     |

| Species                                     | Transposase | RRM                   | zf-CCHC                                                                       | DUF4283 | HTH |
|---------------------------------------------|-------------|-----------------------|-------------------------------------------------------------------------------|---------|-----|
| <i>Cannabis sativa</i>                      |             |                       | zf-CCHC,<br>zf-CCHC_2,<br>zf-CCHC_3,<br>zf-CCHC_4,<br>zf-CCHC_6               | DUF4283 |     |
| <i>Castanea mollissima</i>                  |             |                       | zf-CCHC,<br>zf-CCHC_4                                                         | DUF4283 |     |
| <i>Betula nana</i>                          |             |                       | zf-CCHC_3,<br>zf-CCHC_4                                                       | DUF4283 |     |
| <i>Cucumis melo</i>                         |             |                       | zf-CCHC_4                                                                     | DUF4283 |     |
| <i>Cucumis sativus</i>                      |             |                       | zf-CCHC_2,<br>zf-CCHC_4,<br>zf-CCHC_6                                         | DUF4283 |     |
| <i>Citrullus lanatus</i>                    |             |                       | zf-CCHC,<br>zf-CCHC_4                                                         | DUF4283 |     |
| <i>Populus euphratica</i>                   |             |                       | zf-CCHC,<br>zf-CCHC_3,<br>zf-CCHC_4,<br>zf-CCHC_6                             | DUF4283 |     |
| <i>Populus trichocarpa</i>                  |             | RRM_1                 | zf-CCHC,<br>zf-CCHC_2,<br>zf-CCHC_4,<br>zf-CCHC_6                             | DUF4283 |     |
| <i>Jatropha curcas</i>                      |             |                       | zf-CCHC,<br>zf-CCHC_4                                                         | DUF4283 |     |
| <i>Manihot esculenta</i>                    |             |                       | zf-CCHC,<br>zf-CCHC_4,<br>zf-CCHC_5,<br>zf-CCHC_6                             | DUF4283 |     |
| <i>Ricinus communis</i>                     |             |                       | zf-CCHC,<br>zf-CCHC_4,<br>zf-CCHC_5                                           | DUF4283 |     |
| <i>Eucalyptus camaldulensis</i>             |             | RRM_6                 | zf-CCHC,<br>zf-CCHC_4,<br>zf-CCHC_6                                           | DUF4283 |     |
| <i>Eucalyptus grandis</i>                   |             | Nup35_RRM_2,<br>RRM_6 | zf-CCHC,<br>zf-CCHC_3,<br>zf-CCHC_4,<br>zf-CCHC_5,<br>zf-CCHC_6               | DUF4283 |     |
| <i>Carica papaya</i>                        |             |                       |                                                                               | DUF4283 |     |
| <i>Arabidopsis halleri subsp. gemmifera</i> |             |                       | zf-CCHC,<br>zf-CCHC_2,<br>zf-CCHC_3,<br>zf-CCHC_4,<br>zf-CCHC_5,<br>zf-CCHC_6 | DUF4283 |     |
| <i>Arabidopsis lyrata subsp. lyrata</i>     |             |                       | zf-CCHC,<br>zf-CCHC_2,<br>zf-CCHC_3,<br>zf-CCHC_4,<br>zf-CCHC_6               | DUF4283 |     |

| Species                                          | Transposase | RRM         | zf-CCHC                                                                       | DUF4283 | HTH |
|--------------------------------------------------|-------------|-------------|-------------------------------------------------------------------------------|---------|-----|
| <i>Arabidopsis thaliana</i>                      |             |             | zf-CCHC,<br>zf-CCHC_2,<br>zf-CCHC_3,<br>zf-CCHC_4,<br>zf-CCHC_6               | DUF4283 |     |
| <i>Camelina sativa</i>                           |             | Nup35_RRM.2 | zf-CCHC,<br>zf-CCHC_2,<br>zf-CCHC_3,<br>zf-CCHC_4,<br>zf-CCHC_5,<br>zf-CCHC_6 | DUF4283 |     |
| <i>Capsella rubella</i>                          |             |             | zf-CCHC,<br>zf-CCHC_2,<br>zf-CCHC_3,<br>zf-CCHC_4,<br>zf-CCHC_6               | DUF4283 |     |
| <i>Brassica napus</i>                            |             |             | zf-CCHC,<br>zf-CCHC_2,<br>zf-CCHC_3,<br>zf-CCHC_4,<br>zf-CCHC_5,<br>zf-CCHC_6 | DUF4283 |     |
| <i>Brassica oleracea var. oleracea</i>           |             |             | zf-CCHC,<br>zf-CCHC_2,<br>zf-CCHC_3,<br>zf-CCHC_4,<br>zf-CCHC_5,<br>zf-CCHC_6 | DUF4283 |     |
| <i>Brassica rapa</i>                             |             |             | zf-CCHC,<br>zf-CCHC_2,<br>zf-CCHC_3,<br>zf-CCHC_4,<br>zf-CCHC_6               | DUF4283 |     |
| <i>Raphanus raphanistrum subsp. raphanistrum</i> |             |             | zf-CCHC,<br>zf-CCHC_2,<br>zf-CCHC_3,<br>zf-CCHC_4,<br>zf-CCHC_5,<br>zf-CCHC_6 | DUF4283 |     |
| <i>Raphanus sativus</i>                          |             |             | zf-CCHC,<br>zf-CCHC_2,<br>zf-CCHC_3,<br>zf-CCHC_4,<br>zf-CCHC_5,<br>zf-CCHC_6 | DUF4283 |     |
| <i>Aethionema arabicum</i>                       |             | RRM_6       | zf-CCHC,<br>zf-CCHC_2,<br>zf-CCHC_3,<br>zf-CCHC_4,<br>zf-CCHC_6               | DUF4283 |     |

| Species                           | Transposase | RRM          | zf-CCHC                                                                       | DUF4283 | HTH |
|-----------------------------------|-------------|--------------|-------------------------------------------------------------------------------|---------|-----|
| <i>Arabis alpina</i>              |             | RRM_6        | zf-CCHC,<br>zf-CCHC_2,<br>zf-CCHC_3,<br>zf-CCHC_4,<br>zf-CCHC_5,<br>zf-CCHC_6 | DUF4283 |     |
| <i>Eutrema parvulum</i>           |             |              | zf-CCHC_4                                                                     | DUF4283 |     |
| <i>Eutrema salsugineum</i>        |             |              | zf-CCHC,<br>zf-CCHC_2,<br>zf-CCHC_3,<br>zf-CCHC_4,<br>zf-CCHC_5,<br>zf-CCHC_6 | DUF4283 |     |
| <i>Sisymbrium irio</i>            |             |              | zf-CCHC,<br>zf-CCHC_2,<br>zf-CCHC_3,<br>zf-CCHC_4,<br>zf-CCHC_6               | DUF4283 |     |
| <i>Leavenworthia alabamica</i>    |             |              | zf-CCHC,<br>zf-CCHC_2,<br>zf-CCHC_4,<br>zf-CCHC_6                             | DUF4283 |     |
| <i>Tarenaya hassleriana</i>       |             |              | zf-CCHC,<br>zf-CCHC_2,<br>zf-CCHC_3,<br>zf-CCHC_4,<br>zf-CCHC_6               | DUF4283 |     |
| <i>Gossypium arboretum</i>        |             | RRM_5        | zf-CCHC,<br>zf-CCHC_4                                                         | DUF4283 |     |
| <i>Gossypium raimondii</i>        |             |              | zf-CCHC,<br>zf-CCHC_4                                                         | DUF4283 |     |
| <i>Theobroma cacao</i>            |             |              | zf-CCHC,<br>zf-CCHC_4,<br>zf-CCHC_6                                           | DUF4283 |     |
| <i>Aquilaria agallochum</i>       |             |              | zf-CCHC,<br>zf-CCHC_4                                                         | DUF4283 |     |
| <i>Azadirachta indica</i>         |             |              | zf-CCHC_4                                                                     | DUF4283 |     |
| <i>Citrus clementine</i>          |             | RRM_5, RRM_6 | zf-CCHC,<br>zf-CCHC_2,<br>zf-CCHC_4,<br>zf-CCHC_5,<br>zf-CCHC_6               | DUF4283 |     |
| <i>Citrus sinensis</i>            |             | RRM_5, RRM_6 | zf-CCHC,<br>zf-CCHC_2,<br>zf-CCHC_4,<br>zf-CCHC_6                             | DUF4283 |     |
| <i>Vitis vinifera</i>             |             | RRM_5, RRM_6 |                                                                               | DUF4283 |     |
| <i>Amaranthus hypochondriacus</i> |             | RRM_ocluded  | zf-CCHC,<br>zf-CCHC_3,<br>zf-CCHC_4                                           | DUF4283 |     |

| Species                              | Transposase | RRM                                            | zf-CCHC                                             | DUF4283 | HTH |
|--------------------------------------|-------------|------------------------------------------------|-----------------------------------------------------|---------|-----|
| <i>Beta vulgaris subsp. vulgaris</i> |             | Nup35_RRM.2, RRM.1, RRM.5, RRM.6, RRM.7        | zf-CCHC, zf-CCHC.2, zf-CCHC.3, zf-CCHC.4, zf-CCHC.6 | DUF4283 |     |
| <i>Spinacia oleracea</i>             |             | Nup35_RRM.2, RRM.1, RRM.2, RRM.5, RRM.6, RRM.7 | zf-CCHC, zf-CCHC.2, zf-CCHC.3, zf-CCHC.4, zf-CCHC.5 | DUF4283 |     |
| <i>Dianthus caryophyllus</i>         |             | RRM.3                                          | zf-CCHC, zf-CCHC.3, zf-CCHC.4, zf-CCHC.6            | DUF4283 |     |
| <i>Actinidia chinensis</i>           |             |                                                | zf-CCHC, zf-CCHC.4, zf-CCHC.5                       | DUF4283 |     |
| <i>Vaccinium macrocarpon</i>         |             |                                                | zf-CCHC.4                                           | DUF4283 |     |
| <i>Primula veris</i>                 |             |                                                | zf-CCHC.2, zf-CCHC.4                                | DUF4283 |     |
| <i>Solanum arcanum</i>               |             |                                                | zf-CCHC.3, zf-CCHC.4                                | DUF4283 |     |
| <i>Solanum habrochaites</i>          |             | Nup35_RRM.2                                    | zf-CCHC, zf-CCHC.3, zf-CCHC.4                       | DUF4283 |     |
| <i>Solanum lycopersicum</i>          |             | Nup35_RRM.2                                    | zf-CCHC.4                                           | DUF4283 |     |
| <i>Solanum melongena</i>             |             |                                                | zf-CCHC.4                                           | DUF4283 |     |
| <i>Solanum pennellii</i>             |             |                                                | zf-CCHC.4                                           | DUF4283 |     |
| <i>Solanum pimpinellifolium</i>      |             |                                                | zf-CCHC, zf-CCHC.2, zf-CCHC.4                       | DUF4283 |     |
| <i>Solanum tuberosum</i>             |             |                                                | zf-CCHC, zf-CCHC.3, zf-CCHC.4                       | DUF4283 |     |
| <i>Capsicum annuum</i>               |             |                                                | zf-CCHC.4                                           | DUF4283 |     |
| <i>Nicotiana sylvestris</i>          |             | RRM.5                                          | zf-CCHC, zf-CCHC.3, zf-CCHC.4, zf-CCHC.6            | DUF4283 |     |
| <i>Nicotiana tomentosiformis</i>     |             | RRM.5                                          | zf-CCHC.3, zf-CCHC.4, zf-CCHC.6                     | DUF4283 |     |
| <i>Fraxinus excelsior</i>            |             |                                                | zf-CCHC, zf-CCHC.2, zf-CCHC.3, zf-CCHC.4, zf-CCHC.6 | DUF4283 |     |
| <i>Sesamum indicum</i>               |             |                                                | zf-CCHC, zf-CCHC.4, zf-CCHC.6                       | DUF4283 |     |

| Species                  | Transposase | RRM | zf-CCHC                             | DUF4283 | HTH |
|--------------------------|-------------|-----|-------------------------------------|---------|-----|
| <i>Mimulus guttatus</i>  |             |     | zf-CCHC,<br>zf-CCHC_4,<br>zf-CCHC_6 | DUF4283 |     |
| <i>Conyza canadensis</i> |             |     |                                     | DUF4283 |     |

Table 12: **ORF1p domain summary:** Used to construct the bar plot in Fig. 9(a) of the main text.

|                              | Known ORF1p domains |     |         | Novel ORF1p domains |     |
|------------------------------|---------------------|-----|---------|---------------------|-----|
| Species                      | Transposase         | RRM | zf-CCHC | DUF4283             | HTH |
| <b>MAMMALS</b>               | 99850               | 167 | 29      | 0                   | 0   |
| <b>NON-MAMMALIAN ANIMALS</b> | 943                 | 624 | 1127    | 0                   | 0   |
| <b>PLANTS</b>                | 0                   | 258 | 5784    | 6491                | 13  |

### 3.5.2 Figure 7: ORF1p associated domain network diagrams

As with the ORF2p network graphs - shows strongly associated domains with known ORF1p domains (Transposase\_22, RRM or zf-CCHC). The graph for Viridiplantae (plants) is shown as Figure 9c in the main text.



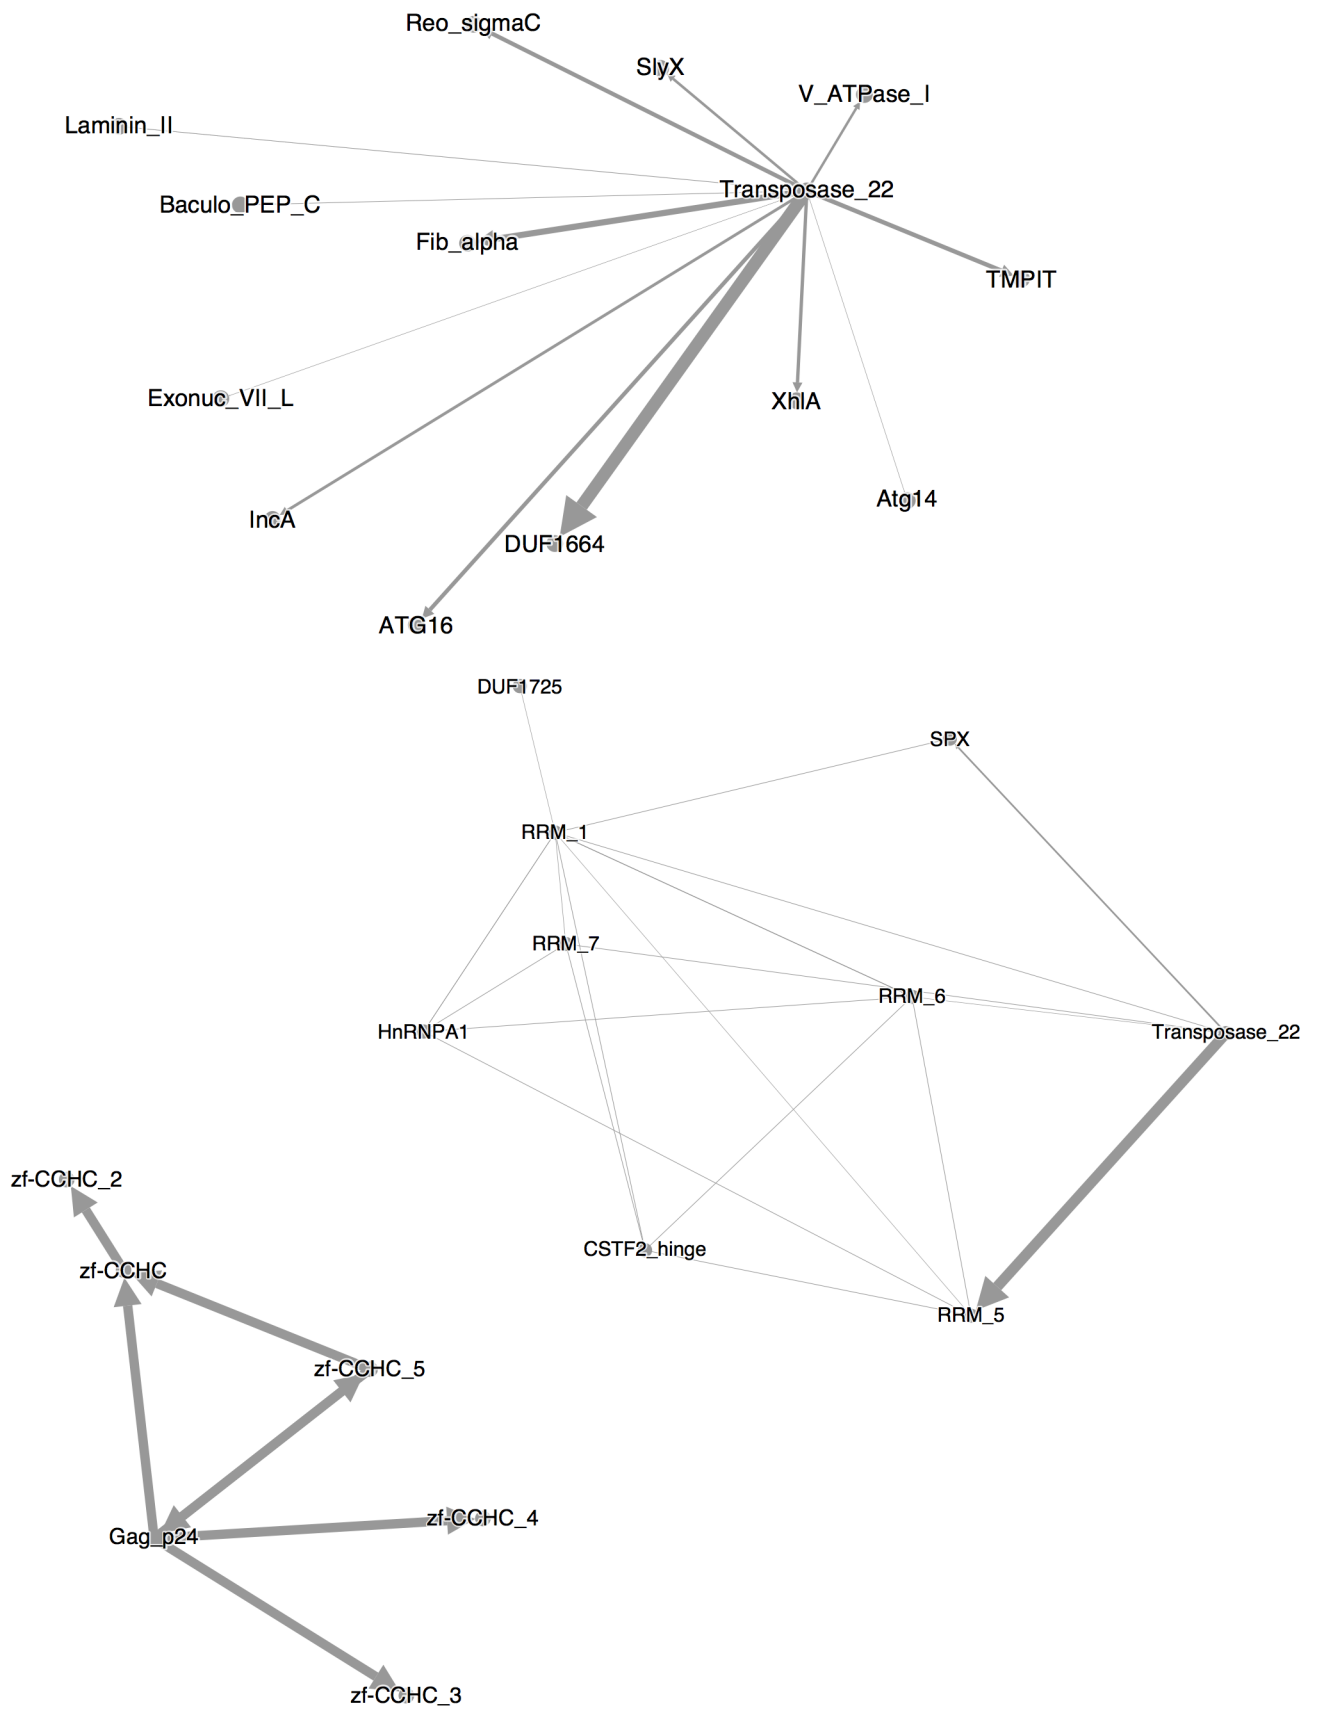

Figure 7a: Mammalia ORF1p domains

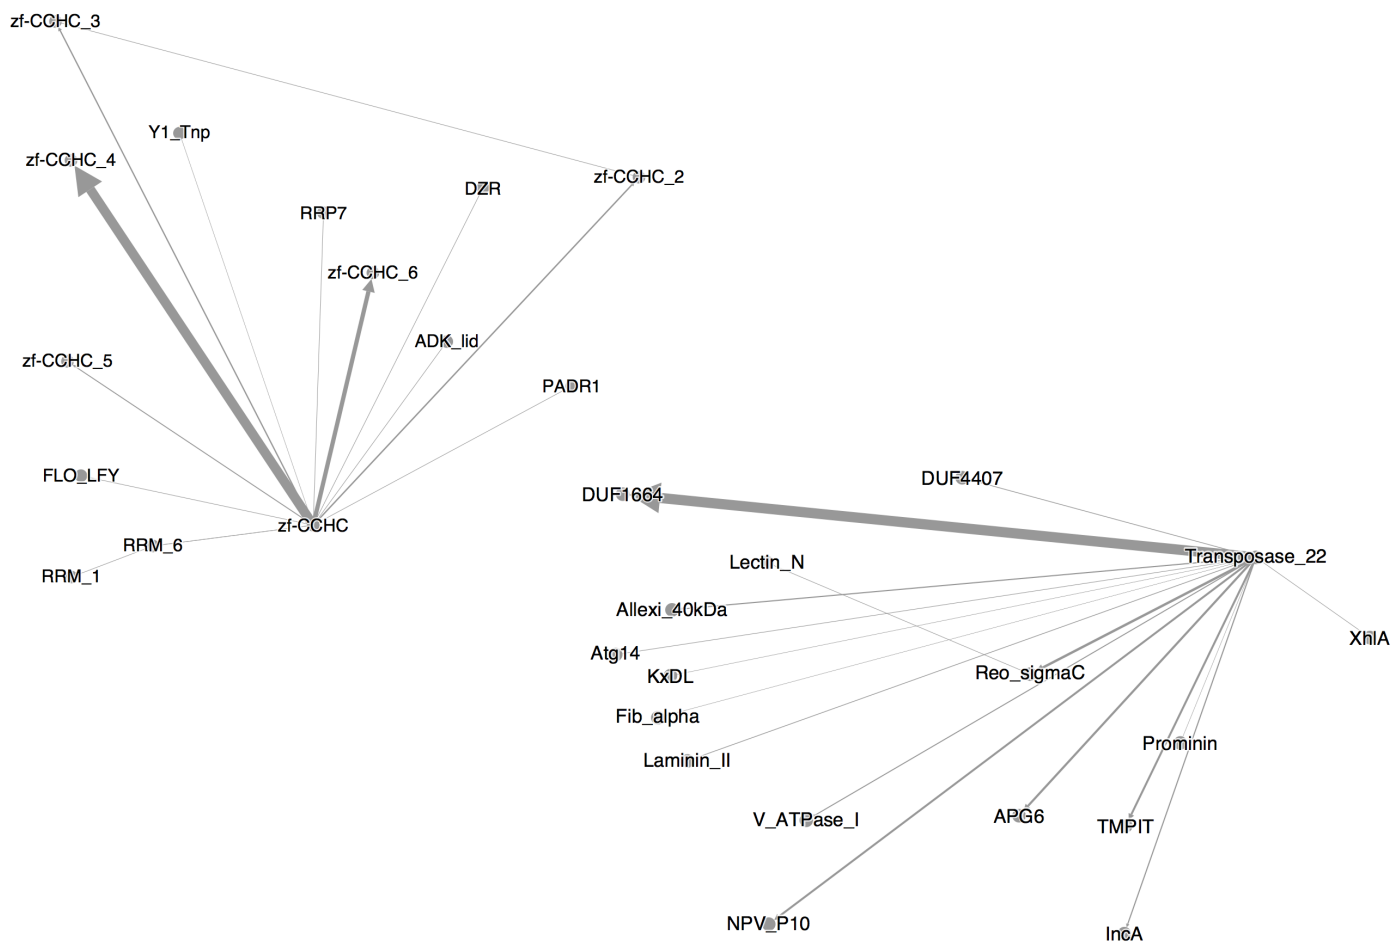

Figure 7b: **Sauropsida ORF1p domains**

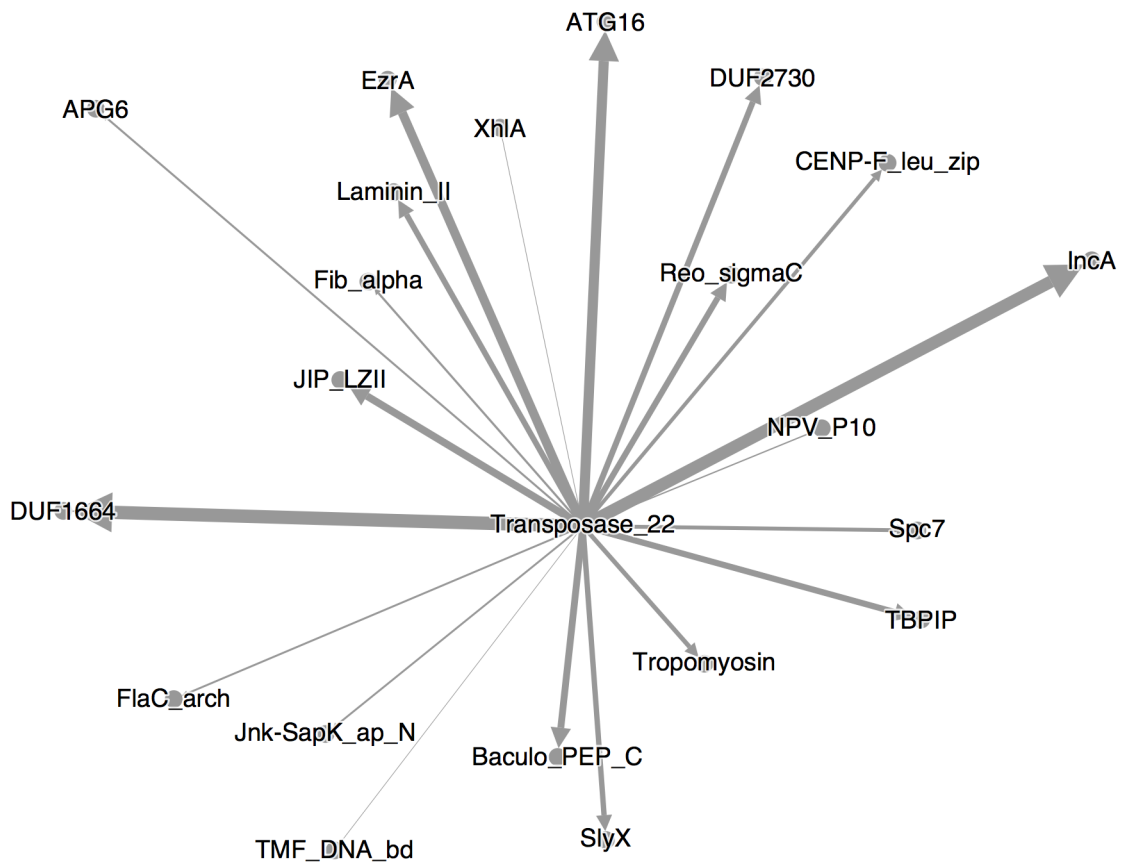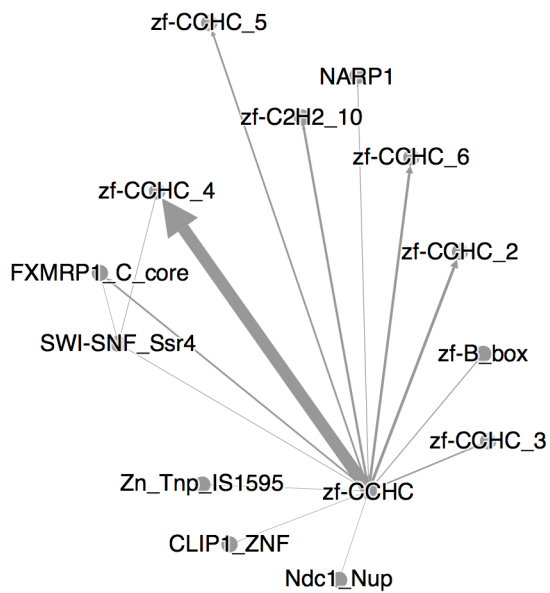

Figure 7c: **Amphibia ORF1p domains**

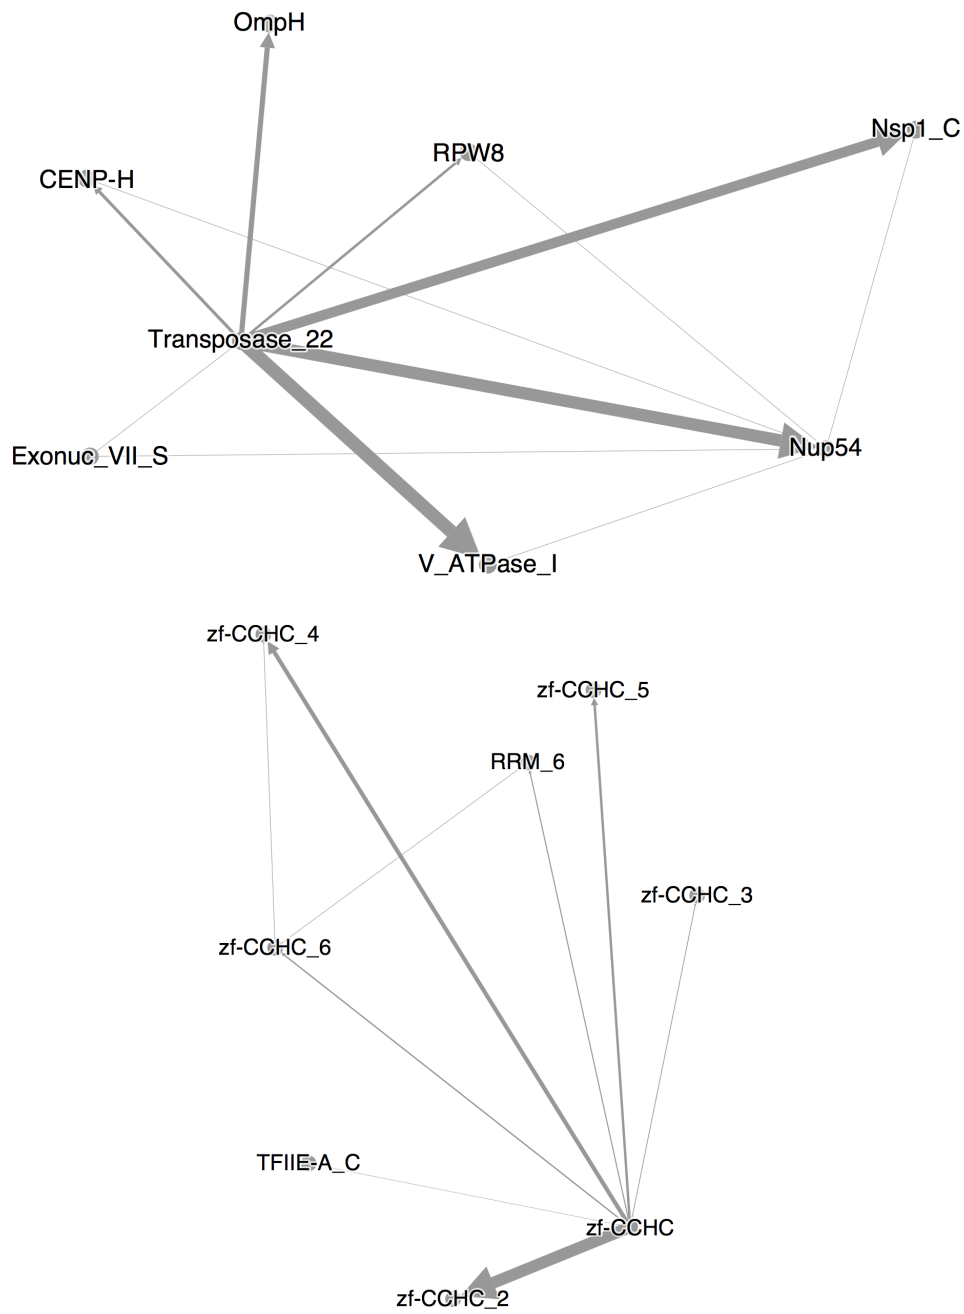

Figure 7d: *Neopterygii* ORF1p domains

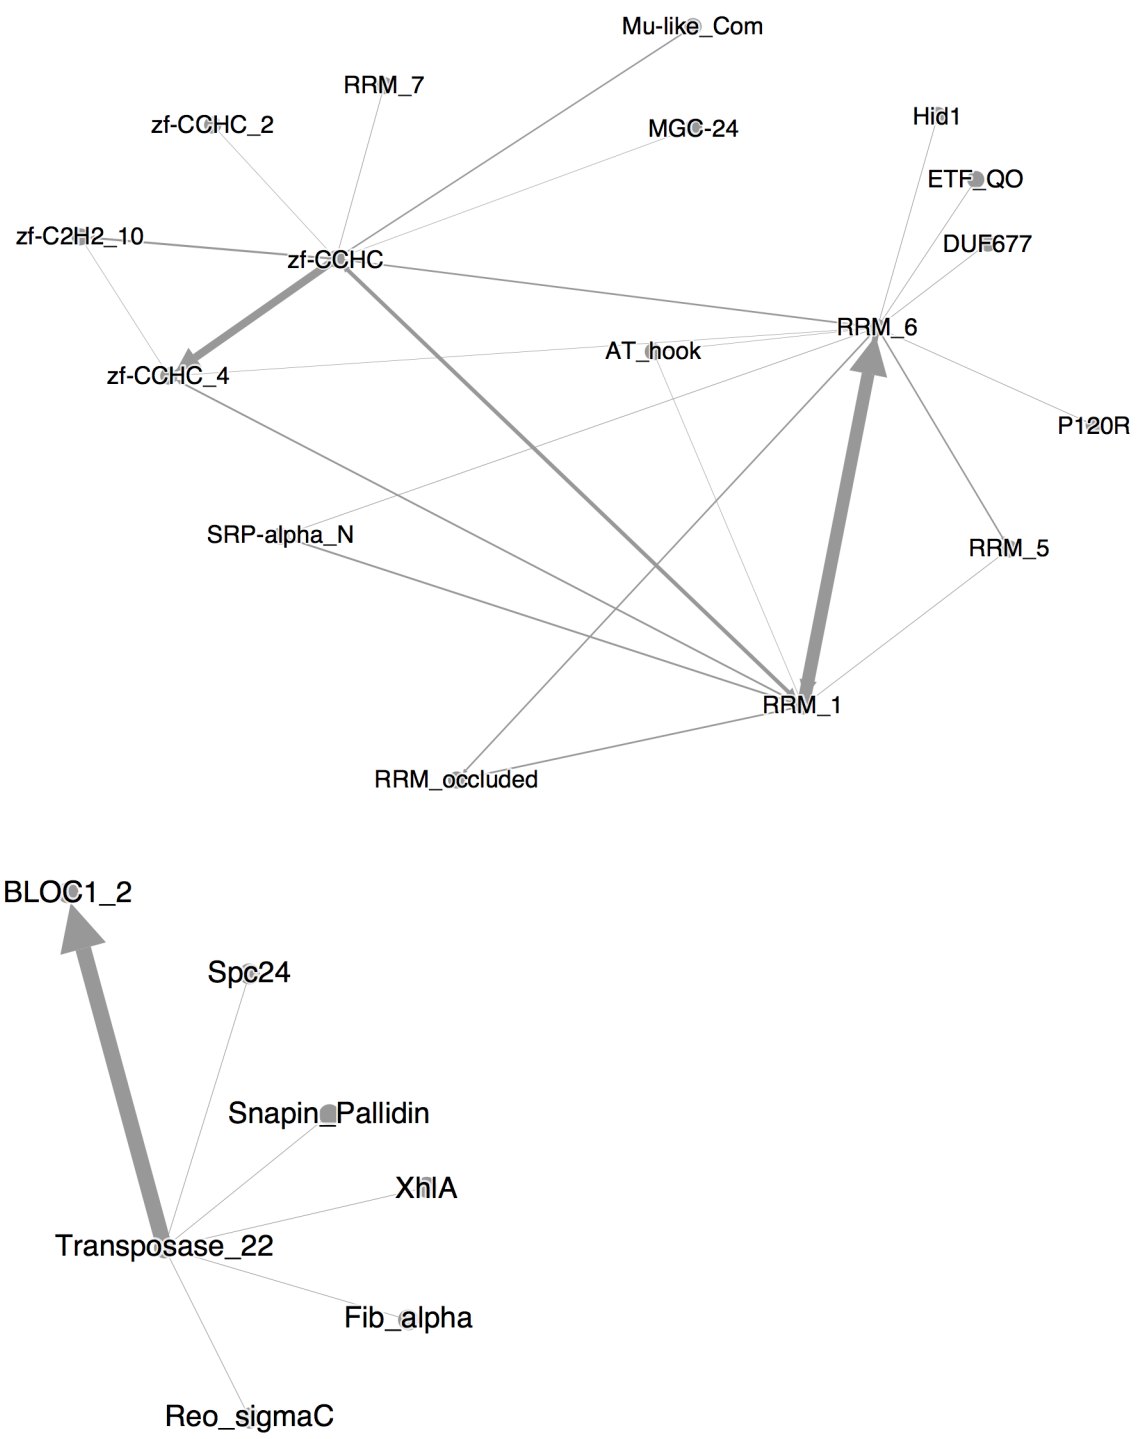

Figure 7e: **Ecdysozoa ORF1p domains**

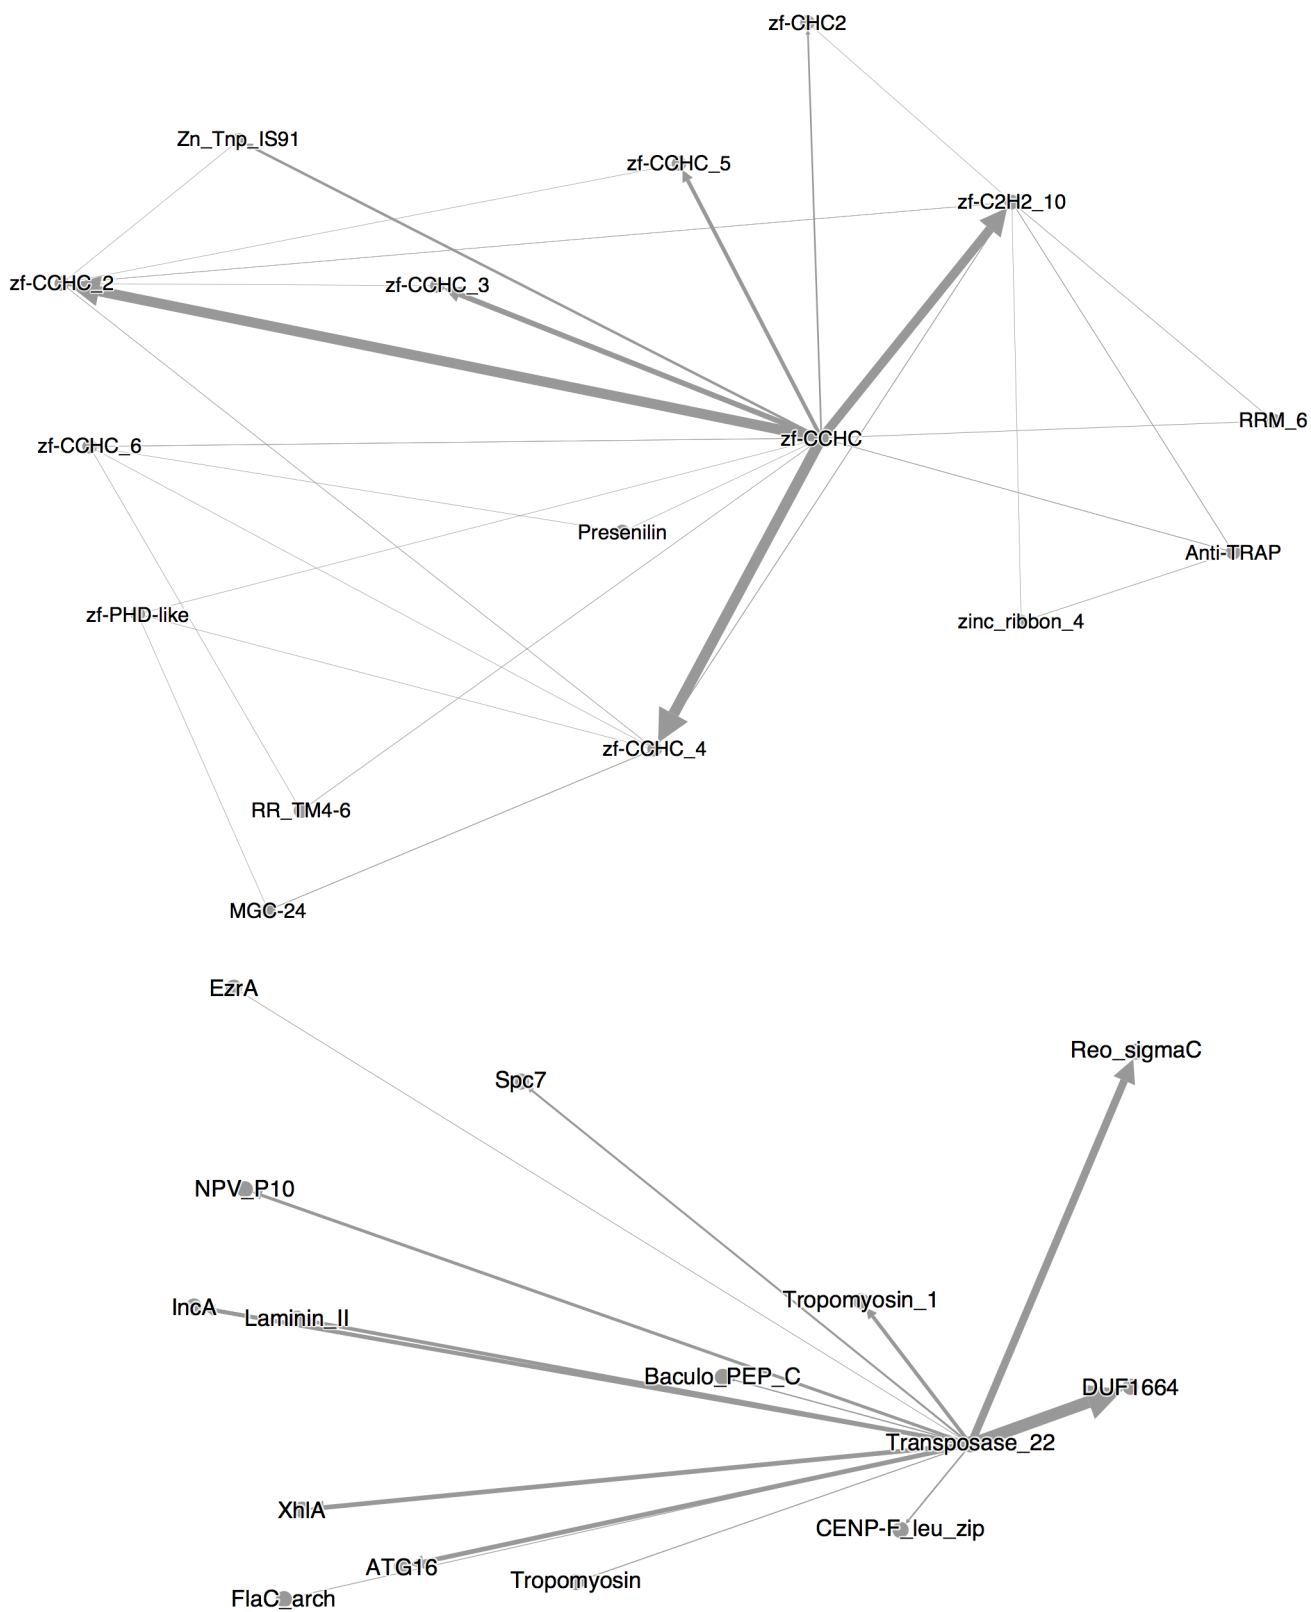

Figure 7f: **Other, primitive non-mammalian species - ORF1p domains**
